# Supplementary material for: DNA Sequencing Predicts 1st-Line Tuberculosis Drug Susceptibility Profiles
Source: PubMed Central journal article supplement (PMC6121966; doi:10.1056/nejmoa1800474), 2018-09-26
Supplement: NEJMoa1800474_Walker_SuppApp.pdf [file NEJMoa1800474_Walker_SuppApp.pdf]

## DNA Sequencing Predicts 1st-Line Tuberculosis Drug Susceptibility Profiles

### Supplementary materials

#### Contents:

|                                                                                                                                                            |       |
|------------------------------------------------------------------------------------------------------------------------------------------------------------|-------|
| Further details on sampling frame (including Table S0), missing data, <i>in silico</i> predictions for commercial molecular assays, and mislabeling rates. | p.2   |
| S1 summary.                                                                                                                                                | p.4   |
| S1 details.<br>(All isolates, SRA accession numbers, phenotypic methods and results, and genotypic predictions)                                            | p.5   |
| S2:<br>(Knowledgebase of mutations used to make genomic predictions)                                                                                       | p.94  |
| S3:<br>(Performance of predictions by drug, and against different associated drug phenotypes)                                                              | p.108 |
| S4:<br>(Performance of predictions for de-duplicated data set, i.e. using only one representative per genomic cluster)                                     | p.117 |
| S5:<br>(Drug profile predictions)                                                                                                                          | p.118 |
| S6:<br>(Performance for individual drugs for isolates with complete phenotypic data available)                                                             | p.119 |
| S7:<br>(Performance of drug profile predictions for isolates from countries' collections that were not enriched for resistance)                            | p.120 |
| S8:<br>(Re-phenotyping results, and results of clerical cross-checking analysis)                                                                           | p.121 |
| S9:<br>(Performance of individual mutations that led to discrepancies, across the whole data set)                                                          | p.122 |
| S10:<br>(Estimated proportion of isolates discrepant due to mislabelling error)                                                                            | p.124 |

Further details on sampling frames, missing data, *in silico* predictions for commercial molecular assays, and mislabelling rates

1. Sampling frame:

Isolates were derived from different collections, as detailed in table S1. All were enriched for resistance, with the exception of the collections from Germany (Hamburg), UK (Birmingham, Oxford, Leeds), Netherlands, and Italy (MGIT study).

The unenriched UK isolates were drawn from a prospective population study from Birmingham (2009-13) and from a collection of routinely sequenced clinical isolates from all of Birmingham since 2013. The surrounding region (the 'Midlands') has been prospectively sequenced since 2014, and was retrospectively sequenced from 2012-14. All isolates from the Midlands region are referred to the one centralised reference laboratory and stored there. Additional UK isolates were prospectively sequenced in Leeds as part of a study to sequence all positive MGIT cultures coming through Leeds laboratory between Oct 2013 to January 2014. Samples from Oxford were all sequenced as part of a prospective local surveillance effort, as well as part of the same study as in Leeds.

The unenriched Italian isolates were sequenced as part of a different prospective study of all positive MGIT cultures in Florence and surrounding province between February and October 2016. In Florence, all TB samples are referred to this one, centralised laboratory.

Isolates from Germany were all sequenced as part of a population study in Hamburg.

Isolates from the Netherlands were sequenced as part of a prospective population-based study in 2016, with additional samples sequenced from previous years as part of outbreak surveillance work. These latter samples were not enriched for resistance.

Although samples from the Birmingham, Oxford and Hamburg population studies were included in a previous study from which part of the knowledgebase of resistance mutations was derived, as described in the methods section ([http://www.thelancet.com/journals/laninf/article/PIIS1473-3099\(15\)00062-6/abstract](http://www.thelancet.com/journals/laninf/article/PIIS1473-3099(15)00062-6/abstract)), no samples that were included in that 2015 paper were re-used in this study (i.e. there is zero overlap across the studies).

Had any of the components of this subset been inadvertently enriched for resistance, we would expect bias towards worse outcome in terms of the negative predictive value, rather than better outcomes. To be secure that no bias occurred, the subset analysis was re-run using only the truly prospectively sampled isolates (samples from Birmingham, only prospective samples from the Midlands outside of Birmingham, samples from Leeds, from Florence, from Hamburg over the final 3 years of that study, and from the Netherlands from 2016 only). The results are shown in table S0 below and are not materially different from those presented in Table 2c, based on all isolates from 'collections unenriched for resistance'.

Table S0:

|     | Resistant phenotype, n (%) |   |   |   | Susceptible phenotype, n (%) |    |       |     | Sensitivity | Specificity | PPV   | NPV  |      |       |
|-----|----------------------------|---|---|---|------------------------------|----|-------|-----|-------------|-------------|-------|------|------|-------|
|     | R                          | S | U | F | R                            | S  | U     | F   |             |             |       |      |      |       |
| INH | 269                        | 8 | 5 | 4 | 286                          | 14 | 2,746 | 80  | 59          | 2,899       | 97.1  | 99.5 | 95.1 | 99.7  |
| RIF | 113                        | 0 | 0 | 9 | 122                          | 27 | 2,877 | 85  | 104         | 3,093       | 100.0 | 99.1 | 80.7 | 100.0 |
| EMB | 64                         | 1 | 0 | 0 | 65                           | 44 | 2,716 | 342 | 33          | 3,135       | 98.5  | 98.4 | 59.3 | 100.0 |
| PZA | 92                         | 6 | 3 | 6 | 107                          | 23 | 2,938 | 10  | 51          | 3,022       | 93.9  | 99.2 | 80.0 | 99.8  |

2. Missing phenotypic data

Missing phenotypic data was largely systematic, with different countries and laboratories having different policies on what was routinely tested. Details are shown in table S1. Some within centre variation was seen, which reflects of occasional assay failure or individual clinical decision to only test a subset of drugs – for example in the context of >1 isolate from the same patient having been referred to the laboratory for testing, or one culture becoming contaminated and another clinical isolate being sought. Alternatively, where PZA susceptibility was not routinely tested, clinical grounds occasionally determined that phenotypic PZA assays were performed.

### 3. *In silico* predictions for the MTB/RIF Xpert and the HAIN MTBDR<sub>plus</sub> and MTBDR<sub>s</sub> v1.0

All genomic loci probed by these tests were explored in the genome sequence data. Where a nucleotide call other than 'wild type' was identified, a prediction was made that the molecular assay in question would report 'resistance'. This included both synonymous and non-synonymous mutations, and therefore covered both HAIN line-probe eventualities of 'MUT' or 'wild type loss'. No prediction for these assays was made where there was a mixed population in the genomic data as it is not clear how the molecular assays would perform in such circumstances.

### 4. Mislabelling rates

The estimated mislabelling rate for isoniazid was greater than for rifampicin. The reason for this is not certain, but a significantly higher error rate was seen in mono-resistant isolates than for MDR-TB. For example, for isoniazid susceptible isolates containing rpoB\_S450L mutations, 8/347 (2.2%) were phenotypically rifampicin susceptible, whilst for isoniazid resistant isolates containing rpoB\_S450L mutations only 11/1527 (0.7%) were phenotypically rifampicin susceptible ( $p=0.01$ ). Similarly, for katG\_S315T mutations, for rifampicin susceptible isolates containing katG\_S315T mutations, 20/1093 (1.8%) were phenotypically isoniazid susceptible, whereas for rifampicin resistant isolates containing katG\_S315T mutations, only 13/1501 (0.9%) were phenotypically isoniazid susceptible ( $p=0.03$ ). It may therefore be that concern about MDR-TB resulted in more careful cross-checking in individual centres, and that this concern was more often present when rpoB mutations had been detected (e.g. by MTB/RIF Xpert pre-testing), leading to a lower error rate than for katG mutations.

# Table S1 summary

Agents routinely tested in this centre (for exceptions, see phenotypic results in Table S1)

| <u>Source of original samples</u>       | <u>Source of data</u>                                                    | <u>Country</u> | <u>WGS location</u> | <u>Phenotypic method</u>                                                                                             | <u>Agents routinely tested in this centre (for exceptions, see phenotypic results in Table S1)</u> | <u>Critical concentrations</u>                                                  |
|-----------------------------------------|--------------------------------------------------------------------------|----------------|---------------------|----------------------------------------------------------------------------------------------------------------------|----------------------------------------------------------------------------------------------------|---------------------------------------------------------------------------------|
| Birmingham and surrounding Midlands, UK | Public Health England, Birmingham, UK                                    | UK             | UK                  | MGIT 960                                                                                                             | HREZ                                                                                               | H 0.1µg/mL; R 1µg/mL; E 5µg/mL; Z 100µg/mL                                      |
| British Columbia , Canada               | British Columbia Centre for Disease Control, Canada                      | Canada         | Canada              | MGIT 960                                                                                                             | HRE                                                                                                | H 0.1µg/mL; R 1µg/mL; E 5µg/mL; Z - direct detection of pyrazinamidase activity |
| Samara, Russian Federation              | Casali et. al. Nat Genet. 2014 (PMID: 24464101)                          | Russia         | Russia              | Resistance ratio method on LJ slopes. Modified Marks biphasic method for pyrazinamide, with confirmation in MGIT 960 | HREZ                                                                                               | n/a                                                                             |
| Belgium                                 | Genoscreen                                                               | Belgium        | France              | MGIT 960                                                                                                             | HREZ                                                                                               | H 0.1µg/mL; R 1.0µg/mL; E 5.0µg/mL; Z 100µg/mL                                  |
| Hamburg                                 | Forschungszentrum Borstel, Germany                                       | Germany        | Germany             | MGIT 960                                                                                                             | HREZ                                                                                               | H 0.1µg/mL; R 1µg/mL; E 5µg/mL; Z 100µg/mL                                      |
| Netherlands                             | Harvard School of Public Health, USA                                     | Netherlands    | USA                 | MGIT 960                                                                                                             | HREZ                                                                                               | H 0.1µg/mL; R 1.0µg/mL; E 5.0µg/mL; Z 100µg/mL                                  |
| Peru                                    | Harvard School of Public Health, USA                                     | Peru           | USA                 | MGIT 960                                                                                                             | HREZ                                                                                               | H 0.2µg/mL; R 1.0µg/mL; E 5.0µg/mL; Z 100µg/mL                                  |
| Italy                                   | San Raffaele Hospital, Milan, Italy                                      | Italy          | Italy               | MGIT 960                                                                                                             | HREZ                                                                                               | H 0.1µg/mL; R 1µg/mL; E 5µg/mL; Z 100µg/mL                                      |
| Italy, MGIT study in Florence           | San Raffaele Hospital, Milan, Italy                                      | Italy          | Italy               | MGIT 960                                                                                                             | HREZ                                                                                               | H 0.1µg/mL; R 1µg/mL; E 5µg/mL; Z 100µg/mL                                      |
| Leeds                                   | Public Health England and Leeds NHS teaching hospital, UK                | UK             | UK                  | MGIT 960                                                                                                             | HREZ                                                                                               | H 0.1µg/mL; R 1µg/mL; E 5µg/mL; Z 100µg/mL                                      |
| London                                  | Public Health England, London and Birmingham, UK                         | UK             | UK                  | Resistance ratio method on LJ slopes. Modified Marks biphasic method for pyrazinamide, with confirmation in MGIT 960 | HREZ                                                                                               | n/a                                                                             |
| Swaziland                               | MSF Swaziland and Forschungszentrum Borstel, Germany                     | Swaziland      | Germany             | MGIT 960                                                                                                             | HRE                                                                                                | H 0.1µg/mL; R 1µg/mL; E 5µg/mL; Z 100µg/mL                                      |
| Netherlands                             | RIVM, Netherlands                                                        | Netherlands    | Netherlands         | MGIT 960                                                                                                             | HREZ                                                                                               | H 0.1µg/mL; R 1µg/mL; E 5µg/mL; Z 100µg/mL                                      |
| Oxford                                  | Oxford University Hospitals NHS Foundation Trust                         | UK             | UK                  | Resistance ratio method on LJ slopes. Modified Marks biphasic method for pyrazinamide, with confirmation in MGIT 960 | HREZ                                                                                               | n/a                                                                             |
| Pakistan                                | National TB Control Programme, Pakistan and San Raffaele Hospital, Milan | Pakistan       | Italy               | LJ proportion method                                                                                                 | HREZ                                                                                               | H 0.2µg/mL; R 40µg/mL; E 2µg/mL; Z 100µg/mL                                     |
| Lima, Peru                              | Lima, Peru and London School of Hygiene and Tropical Medicine, UK        | Peru           | UK                  | MODS                                                                                                                 | HR                                                                                                 | H 0.4µg/mL; R 1.0µg/mL                                                          |
| Serbia                                  | University of Belgrade, Serbia and Forschungszentrum Borstel, Germany    | Serbia         | Serbia              | MGIT 960                                                                                                             | HREZ                                                                                               | H 0.1µg/mL; R 1µg/mL; E 5µg/mL; Z 100µg/mL                                      |
| South Africa                            | NICD, Johannesburg, South Africa                                         | South Africa   | South Africa        | MGIT 960                                                                                                             | HREZ                                                                                               | H 0.1µg/mL; R 1µg/mL; E 5µg/mL; Z 100µg/mL                                      |
| Valencia, Spain                         | Valencia, Spain                                                          | Spain          | Spain               | MGIT 960                                                                                                             | HREZ                                                                                               | H 0.1µg/mL; R 1µg/mL; E 5µg/mL; Z 100µg/mL                                      |
| Thailand                                | National University of Singapore                                         | Thailand       | Singapore           | Middlebrooks 7H10 Agar                                                                                               | HRE                                                                                                | H 0.2µg/mL; R 1.0µg/mL; E 5.0µg/mL                                              |
| New South Wales, Australia              | University of Sydney, Australia                                          | Australia      | Australia           | MGIT 960                                                                                                             | HREZ                                                                                               | H 0.1µg/mL; R 1µg/mL; E 5µg/mL; Z 100µg/mL                                      |
| Shanghai, China                         | Yang et. al. Lancet Infect Diseases 2017 (PMID: 27919643)                | China          | China               | MGIT 960                                                                                                             | HRE                                                                                                | H 0.1µg/mL; R 1µg/mL; E 5µg/mL                                                  |
| China                                   | Zhang et. al. Nat Genet. 2013 (PMID: 23995137)                           | China          | China               | Agar proportion                                                                                                      | HRE                                                                                                | H 0.2µg/mL; R 40µg/mL; E 2µg/mL                                                 |

# Table S1, details

| labnumber | source               | country   | lineage  | SRA        | Bioproject  | Phenotype |            |            |              | Prediction |            |            |              |
|-----------|----------------------|-----------|----------|------------|-------------|-----------|------------|------------|--------------|------------|------------|------------|--------------|
|           |                      |           |          |            |             | Isoniazid | Rifampicin | Ethambutol | Pyrazinamide | Isoniazid  | Rifampicin | Ethambutol | Pyrazinamide |
| S15       | University of Sydney | Australia | Beijing  | SRR2333215 | PRJNA270697 | R         | R          | S          | R            | R          | R          | R          | R            |
| S43       | University of Sydney | Australia | Beijing  | SRR2328057 | PRJNA270697 | R         | S          | S          | R            | R          | S          | S          | R            |
| S6        | University of Sydney | Australia | lineage4 | SRR6369878 | PRJNA393378 | R         | R          | S          | R            | R          | S          | S          | R            |
| S27       | University of Sydney | Australia | Beijing  | SRR6339651 | PRJNA393378 | R         | R          | R          | S            | R          | R          | R          | S            |
| S3        | University of Sydney | Australia | LAM      | SRR6369876 | PRJNA393378 | R         | R          | S          | R            | R          | R          | R          | R            |
| S11       | University of Sydney | Australia | Beijing  | SRR6339662 | PRJNA393378 | R         | R          | S          | S            | R          | R          | R          | R            |
| S37       | University of Sydney | Australia | Beijing  | SRR6339664 | PRJNA393378 | R         | R          | S          | S            | R          | R          | S          | S            |
| S19       | University of Sydney | Australia | LAM      | SRR5817471 | PRJNA393378 | R         | R          | S          | R            | R          | R          | S          | S            |
| S18       | University of Sydney | Australia | Delhi    | SRR5817467 | PRJNA393378 | R         | R          | S          | S            | R          | R          | S          | S            |
| S4        | University of Sydney | Australia | Beijing  | SRR6369875 | PRJNA393378 | R         | R          | S          | R            | S          | F          | S          | S            |
| S21       | University of Sydney | Australia | EAI      | SRR6367396 | PRJNA393378 | R         | R          | S          | S            | S          | S          | S          | S            |
| S28       | University of Sydney | Australia | lineage4 | SRR6339645 | PRJNA393378 | R         | R          | S          | S            | S          | R          | U          | S            |
| S44       | University of Sydney | Australia | Beijing  | SRR6369877 | PRJNA393378 | R         | S          | R          | S            | R          | S          | R          | S            |
| S2        | University of Sydney | Australia | Beijing  | SRR5817478 | PRJNA393378 | R         | R          | S          | R            | R          | R          | R          | R            |
| S22       | University of Sydney | Australia | Delhi    | SRR6339641 | PRJNA393378 | R         | R          | S          | S            | R          | R          | S          | S            |
| S31       | University of Sydney | Australia | EAI      | SRR6339667 | PRJNA393378 | R         | S          | R          | S            | R          | S          | R          | S            |
| S30       | University of Sydney | Australia | Delhi    | SRR6339661 | PRJNA393378 | R         | R          | S          | S            | R          | R          | R          | R            |
| S33       | University of Sydney | Australia | LAM      | SRR5817480 | PRJNA393378 | R         | R          | S          | S            | R          | R          | R          | S            |
| S26       | University of Sydney | Australia | Haarlem  | SRR6339648 | PRJNA393378 | R         | R          | S          | S            | R          | R          | S          | S            |
| S29       | University of Sydney | Australia | EAI      | SRR6339653 | PRJNA393378 | R         | R          | R          | R            | R          | R          | R          | R            |
| S13       | University of Sydney | Australia | Beijing  | SRR6367401 | PRJNA393378 | R         | R          | R          | R            | R          | R          | R          | R            |
| S20       | University of Sydney | Australia | Beijing  | SRR6339640 | PRJNA393378 | R         | R          | S          | R            | R          | R          | R          | R            |
| S8        | University of Sydney | Australia | Beijing  | SRR6339666 | PRJNA393378 | R         | R          | S          | R            | R          | R          | R          | R            |
| S25       | University of Sydney | Australia | LAM      | SRR6339637 | PRJNA393378 | R         | R          | S          | S            | R          | R          | S          | S            |
| S17       | University of Sydney | Australia | Beijing  | SRR6339643 | PRJNA393378 | R         | R          | R          | R            | R          | R          | R          | R            |
| S39       | University of Sydney | Australia | Beijing  | SRR5817472 | PRJNA393378 | R         | R          | R          | R            | S          | F          | F          | F            |
| S10       | University of Sydney | Australia | Beijing  | SRR5817475 | PRJNA393378 | R         | R          | S          | S            | R          | R          | S          | S            |
| S16       | University of Sydney | Australia | Beijing  | SRR5817469 | PRJNA393378 | R         | R          | R          | R            | R          | R          | R          | R            |
| S14       | University of Sydney | Australia | Beijing  | SRR5817464 | PRJNA393378 | R         | R          | R          | R            | R          | R          | R          | R            |
| S34       | University of Sydney | Australia | Haarlem  | SRR5817470 | PRJNA393378 | R         | R          | R          | R            | R          | R          | R          | R            |
| S35       | University of Sydney | Australia | Tur      | SRR6339649 | PRJNA393378 | R         | R          | R          | S            | R          | R          | R          | S            |
| S23       | University of Sydney | Australia | EAI      | SRR5817479 | PRJNA393378 | R         | R          | S          | R            | R          | R          | R          | R            |
| S42       | University of Sydney | Australia | Beijing  | SRR6339665 | PRJNA393378 | R         | S          | S          | R            | R          | S          | S          | R            |
| S38       | University of Sydney | Australia | Beijing  | SRR5817473 | PRJNA393378 | R         | R          | S          | R            | R          | R          | U          | R            |
| S9        | University of Sydney | Australia | EAI      | SRR6339644 | PRJNA393378 | R         | R          | R          | R            | R          | R          | R          | R            |
| S1        | University of Sydney | Australia | EAI      | SRR6367399 | PRJNA393378 | R         | R          | R          | R            | R          | R          | R          | R            |
| S32       | University of Sydney | Australia | EAI      | SRR5817481 | PRJNA393378 | R         | R          | R          | S            | R          | F          | R          | F            |
| S41       | University of Sydney | Australia | Beijing  | SRR6367398 | PRJNA393378 | R         | R          | S          | R            | R          | R          | R          | F            |
| S36       | University of Sydney | Australia | Beijing  | SRR5817466 | PRJNA393378 | R         | R          | R          | R            | R          | F          | R          | R            |
| S12       | University of Sydney | Australia | Delhi    | SRR6339642 | PRJNA393378 | R         | R          | R          | R            | R          | R          | R          | R            |
| S7        | University of Sydney | Australia | Delhi    | SRR5817463 | PRJNA393378 | R         | R          | S          | S            | R          | R          | R          | S            |
| S5        | University of Sydney | Australia | Beijing  | SRR6367400 | PRJNA393378 | R         | R          | R          | S            | R          | R          | R          | S            |
| 12MY1752  | Genoscreen           | Belgium   | lineage4 |            |             | R         | R          | R          | R            | R          | R          | R          | R            |
| 10MY0917  | Genoscreen           | Belgium   | lineage4 |            |             | R         | R          | R          | R            | R          | R          | R          | U            |
| 13MY0792  | Genoscreen           | Belgium   | lineage4 |            |             | S         | S          | S          | S            | S          | S          | S          | S            |
| 13MY0573  | Genoscreen           | Belgium   | lineage4 |            |             | S         | S          | S          | S            | S          | S          | S          | S            |
| 13MY0452  | Genoscreen           | Belgium   | Haarlem  |            |             | S         | S          | S          | S            | S          | S          | S          | S            |
| 13MY0772  | Genoscreen           | Belgium   | LAM      |            |             | S         | S          | S          | S            | S          | S          | S          | S            |
| 13MY1139  | Genoscreen           | Belgium   | Delhi    |            |             | S         | S          | S          | S            | S          | S          | S          | S            |
| 13MY0669  | Genoscreen           | Belgium   | Haarlem  |            |             | S         | S          | S          | S            | S          | S          | S          | S            |
| 13MY1440  | Genoscreen           | Belgium   | S-type   |            |             | S         | S          | S          | S            | S          | S          | S          | S            |
| 12MY1792  | Genoscreen           | Belgium   | LAM      |            |             | R         | R          | S          | R            | R          | R          | R          | R            |
| 07MY0662  | Genoscreen           | Belgium   | lineage4 |            |             | R         | R          | R          | n/a          | R          | R          | R          | S            |
| 10MY1099  | Genoscreen           | Belgium   | Beijing  |            |             | R         | R          | R          | R            | R          | R          | R          | R            |
| 13MY1270  | Genoscreen           | Belgium   | lineage4 |            |             | R         | R          | S          | S            | R          | R          | S          | S            |
| 13MY1250  | Genoscreen           | Belgium   | Haarlem  |            |             | S         | S          | S          | S            | F          | F          | S          | F            |
| 13MY2090  | Genoscreen           | Belgium   | Delhi    |            |             | S         | S          | S          | S            | S          | S          | S          | S            |
| 11MY0618  | Genoscreen           | Belgium   | LAM      |            |             | R         | R          | R          | R            | R          | R          | R          | R            |
| 08MY1539  | Genoscreen           | Belgium   | Beijing  |            |             | S         | S          | S          | R            | S          | S          | U          | S            |
| 08MY0449  | Genoscreen           | Belgium   | Beijing  |            |             | R         | R          | R          | R            | R          | R          | R          | R            |
| 13MY1366  | Genoscreen           | Belgium   | S-type   |            |             | S         | S          | S          | S            | S          | S          | S          | S            |
| 13MY2169  | Genoscreen           | Belgium   | LAM      |            |             | S         | S          | S          | S            | S          | S          | S          | S            |
| 09MY0190  | Genoscreen           | Belgium   | Beijing  |            |             | R         | R          | R          | S            | R          | R          | R          | R            |
| 13MY2158  | Genoscreen           | Belgium   | Haarlem  |            |             | S         | S          | S          | S            | S          | U          | S          | S            |
| 14MY0713  | Genoscreen           | Belgium   | Beijing  |            |             | R         | R          | R          | R            | R          | R          | R          | S            |
| 13MY0539  | Genoscreen           | Belgium   | BCG      |            |             | S         | S          | S          | R            | S          | S          | U          | R            |
| 08MY1353  | Genoscreen           | Belgium   | Haarlem  |            |             | R         | R          | S          | n/a          | U          | R          | S          | S            |
| 13MY0773  | Genoscreen           | Belgium   | BCG      |            |             | S         | S          | S          | R            | S          | S          | S          | R            |
| 15MY0145  | Genoscreen           | Belgium   | Tur      |            |             | R         | R          | S          | S            | R          | R          | S          | R            |
| 13MY1143  | Genoscreen           | Belgium   | lineage4 |            |             | S         | S          | S          | S            | S          | S          | U          | S            |
| 13MY1533  | Genoscreen           | Belgium   | Beijing  |            |             | S         | S          | S          | S            | S          | S          | S          | S            |
| 13MY0570  | Genoscreen           | Belgium   | Uganda   |            |             | S         | S          | S          | S            | S          | S          | S          | S            |
| 14MY0112  | Genoscreen           | Belgium   | Beijing  |            |             | R         | R          | R          | R            | R          | R          | R          | R            |
| 13MY1206  | Genoscreen           | Belgium   | lineage4 |            |             | S         | S          | S          | S            | U          | S          | S          | S            |
| 11MY0284  | Genoscreen           | Belgium   | Beijing  |            |             | R         | R          | R          | R            | R          | R          | R          | S            |
| 14MY1450  | Genoscreen           | Belgium   | Haarlem  |            |             | R         | R          | R          | R            | S          | R          | R          | R            |
| 13MY0526  | Genoscreen           | Belgium   | S-type   |            |             | S         | S          | S          | S            | S          | S          | S          | S            |
| 13MY0757  | Genoscreen           | Belgium   | LAM      |            |             | S         | S          | S          | S            | S          | S          | U          | S            |
| 13MY1824  | Genoscreen           | Belgium   | Haarlem  |            |             | S         | S          | S          | S            | S          | S          | S          | S            |
| 13MY0319  | Genoscreen           | Belgium   | Beijing  |            |             | R         | R          | S          | S            | R          | R          | R          | R            |
| 13MY1058  | Genoscreen           | Belgium   | Haarlem  |            |             | S         | S          | S          | S            | S          | S          | S          | S            |
| 13MY1372  | Genoscreen           | Belgium   | S-type   |            |             | S         | S          | S          | S            | S          | S          | S          | S            |
| 11MY1855  | Genoscreen           | Belgium   | LAM      |            |             | R         | R          | R          | R            | R          | R          | R          | R            |
| 13MY1557  | Genoscreen           | Belgium   | M. bovis |            |             | S         | S          | S          | R            | S          | S          | S          | S            |
| 08MY0205  | Genoscreen           | Belgium   | LAM      |            |             | R         | R          | R          | S            | R          | R          | R          | S            |
| 08MY1581  | Genoscreen           | Belgium   | Beijing  |            |             | R         | R          | R          | R            | R          | R          | R          | U            |
| 13MY1309  | Genoscreen           | Belgium   | Delhi    |            |             | S         | S          | S          | S            | S          | S          | S          | S            |
| 13MY1985  | Genoscreen           | Belgium   | Haarlem  |            |             | S         | S          | S          | S            | S          | S          | S          | S            |
| 13MY1307  | Genoscreen           | Belgium   | LAM      |            |             | S         | S          | S          | S            | S          | S          | S          | S            |
| 13MY0494  | Genoscreen           | Belgium   | Beijing  |            |             | R         | R          | R          | R            | R          | R          | R          | R            |
| 14MY2137  | Genoscreen           | Belgium   | Beijing  |            |             | R         | R          | S          | R            | R          | R          | F          | F            |
| 13MY0586  | Genoscreen           | Belgium   | BCG      |            |             | S         | S          | S          | R            | S          | S          | S          | R            |
| 13MY1114  | Genoscreen           | Belgium   | lineage4 |            |             | S         | S          | S          | S            | U          | S          | S          | S            |
| 08MY0349  | Genoscreen           | Belgium   | Beijing  |            |             | R         | R          | R          | R            | R          | R          | R          | R            |
| 13MY1467  | Genoscreen           | Belgium   | S-type   |            |             | S         | S          | S          | S            | S          | S          | S          | S            |
| 08MY0385  | Genoscreen           | Belgium   | Beijing  |            |             | R         | R          | S          | S            | U          | R          | S          | S            |
| 14MY1571  | Genoscreen           | Belgium   | lineage4 |            |             | R         | R          | S          | R            | R          | R          | S          | R            |
| 13MY2082  | Genoscreen           | Belgium   | Haarlem  |            |             | S         | S          | S          | S            | S          | U          | S          | S            |
| 13MY2202  | Genoscreen           | Belgium   | Haarlem  |            |             | S         | S          | S          | S            | S          | S          | S          | S            |
| 13MY1123  | Genoscreen           | Belgium   | Haarlem  |            |             | S         | S          | S          | S            | S          | S          | S          | S            |
| 13MY1199  | Genoscreen           | Belgium   | LAM      |            |             | S         | S          | S          | S            | S          | S          | S          | S            |
| 13MY1221  | Genoscreen           | Belgium   | lineage4 |            |             | S         | S          | S          | S            | S          | S          | S          | S            |
| 09MY0467  | Genoscreen           | Belgium   | Beijing  |            |             | R         | R          | R          | R            | R          | R          | R          | S            |
| 13MY1311  | Genoscreen           | Belgium   | lineage4 |            |             | S         | S          | S          | S            | S          | S          | S          | S            |
| 13MY0822  | Genoscreen           | Belgium   | lineage4 |            |             | S         | S          | S          | S            | S          | S          | S          | S            |
| 07MY1001  | Genoscreen           | Belgium   | Beijing  |            |             | R         | R          | R          | n/a          | R          | R          | R          | R            |
| 13MY1442  | Genoscreen           | Belgium   | Beijing  |            |             | R         | R          | R          | R            | R          | R          | R          | R            |
| 13MY2048  | Genoscreen           | Belgium   | Haarlem  |            |             | S         | S          | S          | S            | S          | S          | S          | S            |
| 07MY0942  | Genoscreen           | Belgium   | Uganda   |            |             | R         | R          | R          | n/a          | R          | R          | R          | R            |
| 13MY0518  | Genoscreen           | Belgium   | Haarlem  |            |             | S         | S          | S          | S            | S          | S          | S          | S            |
| 13MY1981  | Genoscreen           | Belgium   | Haarlem  |            |             | S         | S          | S          | S            | S          | S          | S          | S            |
| 13MY0965  | Genoscreen           | Belgium   | Haarlem  |            |             | S         | S          | S          | S            | S          | S          | S          | S            |
| 13MY1265  | Genoscreen           | Belgium   | Haarlem  |            |             | S         | S          | S          | S            | S          | S          | S          | S            |
| 07MY0789  | Genoscreen           | Belgium   | Uganda   |            |             | R         | R          | R          | n/a          | R          | R          | R          | R            |



|          |                                             |         |              |             |     |   |     |     |   |   |   |
|----------|---------------------------------------------|---------|--------------|-------------|-----|---|-----|-----|---|---|---|
| 13MY1937 | Genoscreen                                  | Belgium | LAM          | S           | S   | S | S   | S   | S | S | S |
| 13MY0475 | Genoscreen                                  | Belgium | Haarlem      | S           | S   | S | S   | S   | S | S | S |
| 09MY1304 | Genoscreen                                  | Belgium | Beijing      | R           | R   | S | S   | R   | R | U | S |
| 12MY0223 | Genoscreen                                  | Belgium | lineage4     | R           | R   | S | S   | R   | R | S | S |
| 13MY1983 | Genoscreen                                  | Belgium | lineage4     | S           | S   | S | S   | S   | S | S | S |
| 07MY0788 | Genoscreen                                  | Belgium | Beijing      | R           | R   | R | n/a | R   | R | R | R |
| 13MY1065 | Genoscreen                                  | Belgium | Beijing      | S           | S   | S | S   | U   | S | S | S |
| 11MY0630 | Genoscreen                                  | Belgium | Delhi        | R           | R   | S | R   | R   | R | R | R |
| 13MY1323 | Genoscreen                                  | Belgium | S-type       | S           | S   | S | S   | S   | S | S | S |
| 13MY0578 | Genoscreen                                  | Belgium | lineage4     | S           | S   | S | S   | S   | S | S | S |
| 12MY1157 | Genoscreen                                  | Belgium | Beijing      | R           | R   | R | R   | R   | R | R | R |
| 12MY1487 | Genoscreen                                  | Belgium | Beijing      | R           | R   | S | R   | U   | R | S | R |
| 13MY0866 | Genoscreen                                  | Belgium | LAM          | S           | S   | S | S   | S   | S | S | S |
| 09MY0426 | Genoscreen                                  | Belgium | Beijing      | R           | R   | R | R   | R   | R | R | U |
| 13MY2189 | Genoscreen                                  | Belgium | lineage4     | S           | S   | S | S   | S   | U | S | S |
| 13MY1127 | Genoscreen                                  | Belgium | Haarlem      | S           | S   | S | S   | S   | S | S | S |
| 13MY1163 | Genoscreen                                  | Belgium | lineage4     | S           | S   | S | S   | S   | S | S | U |
| 13MY1581 | Genoscreen                                  | Belgium | Cameroon     | S           | S   | S | S   | S   | S | S | S |
| 13MY1003 | Genoscreen                                  | Belgium | lineage4     | S           | S   | S | S   | S   | S | S | S |
| 11MY0214 | Genoscreen                                  | Belgium | Beijing      | R           | R   | R | R   | R   | R | R | R |
| 13MY1864 | Genoscreen                                  | Belgium | lineage4     | S           | S   | S | S   | S   | S | S | S |
| 11MY1117 | Genoscreen                                  | Belgium | LAM          | R           | R   | R | S   | R   | R | U | S |
| 13MY1095 | Genoscreen                                  | Belgium | BCG          | S           | S   | S | R   | S   | S | S | R |
| 10MY1264 | Genoscreen                                  | Belgium | Beijing      | R           | R   | S | S   | R   | R | S | S |
| 13MY1825 | Genoscreen                                  | Belgium | LAM          | S           | S   | S | S   | S   | S | S | S |
| 13MY0969 | Genoscreen                                  | Belgium | Ural         | S           | S   | S | S   | S   | S | S | S |
| 13MY1216 | Genoscreen                                  | Belgium | Ghana        | S           | S   | S | S   | S   | S | S | S |
| 13MY1867 | Genoscreen                                  | Belgium | LAM          | S           | S   | S | S   | S   | S | U | S |
| 11MY0596 | Genoscreen                                  | Belgium | Beijing      | R           | R   | R | R   | R   | R | R | R |
| 13MY1106 | Genoscreen                                  | Belgium | EAI          | S           | S   | S | S   | S   | S | S | S |
| 13MY1164 | Genoscreen                                  | Belgium | West Africar | S           | S   | S | S   | S   | U | U | S |
| 13MY0803 | Genoscreen                                  | Belgium | Haarlem      | S           | S   | S | S   | S   | S | U | S |
| 13MY0702 | Genoscreen                                  | Belgium | Haarlem      | S           | S   | S | S   | S   | S | S | S |
| 07MY1281 | Genoscreen                                  | Belgium | Beijing      | R           | R   | R | R   | R   | R | R | R |
| 13MY1832 | Genoscreen                                  | Belgium | lineage4     | S           | S   | S | S   | S   | S | S | S |
| 15MY0479 | Genoscreen                                  | Belgium | Ural         | R           | R   | S | S   | R   | R | U | S |
| 07MY0066 | Genoscreen                                  | Belgium | Beijing      | R           | R   | R | n/a | R   | R | R | R |
| 08MY1602 | Genoscreen                                  | Belgium | LAM          | R           | R   | R | R   | R   | R | R | R |
| 12MY1124 | Genoscreen                                  | Belgium | Delhi        | R           | R   | S | S   | R   | R | S | S |
| 13MY0537 | Genoscreen                                  | Belgium | LAM          | S           | S   | S | S   | S   | S | S | S |
| 13MY0802 | Genoscreen                                  | Belgium | Haarlem      | S           | S   | S | R   | S   | S | S | S |
| 13MY2167 | Genoscreen                                  | Belgium | S-type       | S           | S   | S | S   | S   | S | S | S |
| 14MY1492 | Genoscreen                                  | Belgium | Beijing      | R           | R   | R | R   | R   | R | R | R |
| 14MY1932 | Genoscreen                                  | Belgium | Haarlem      | R           | R   | S | R   | R   | R | R | U |
| 13MY0734 | Genoscreen                                  | Belgium | EAI          | S           | S   | S | R   | S   | S | S | S |
| 08MY1520 | Genoscreen                                  | Belgium | Beijing      | R           | R   | R | R   | R   | R | R | R |
| 14s464   | British Columbia Centre for Disease Control | Canada  | EAI          | PRJNA413593 | S   | S | S   | n/a | S | S | S |
| 10s433   | British Columbia Centre for Disease Control | Canada  | EAI          | PRJNA413593 | S   | S | S   | n/a | S | S | S |
| A9s165   | British Columbia Centre for Disease Control | Canada  | Beijing      | PRJNA413593 | R   | S | S   | n/a | R | S | S |
| 10s098   | British Columbia Centre for Disease Control | Canada  | EAI          | PRJNA413593 | S   | S | S   | n/a | S | S | S |
| 13s341   | British Columbia Centre for Disease Control | Canada  | S-type       | PRJNA413593 | S   | S | S   | n/a | S | S | S |
| 14s364   | British Columbia Centre for Disease Control | Canada  | Delhi        | PRJNA413593 | R   | S | S   | S   | R | S | S |
| A9s053   | British Columbia Centre for Disease Control | Canada  | EAI          | PRJNA413593 | S   | S | S   | n/a | S | S | S |
| 11s419   | British Columbia Centre for Disease Control | Canada  | Beijing      | PRJNA413593 | R   | R | S   | R   | R | R | R |
| 11s350   | British Columbia Centre for Disease Control | Canada  | Ural         | PRJNA413593 | S   | S | S   | n/a | S | S | S |
| A6s148   | British Columbia Centre for Disease Control | Canada  | Beijing      | PRJNA413593 | S   | S | S   | n/a | S | S | S |
| 13s039   | British Columbia Centre for Disease Control | Canada  | lineage4     | PRJNA413593 | S   | S | S   | n/a | S | S | U |
| A4s024   | British Columbia Centre for Disease Control | Canada  | LAM          | PRJNA413593 | S   | S | S   | n/a | S | S | S |
| A8s260   | British Columbia Centre for Disease Control | Canada  | Beijing      | PRJNA413593 | R   | S | S   | n/a | R | S | S |
| A6s372   | British Columbia Centre for Disease Control | Canada  | S-type       | PRJNA413593 | S   | S | S   | n/a | S | U | S |
| 13s350   | British Columbia Centre for Disease Control | Canada  | EAI          | PRJNA413593 | S   | S | S   | n/a | S | S | S |
| A7s071   | British Columbia Centre for Disease Control | Canada  | lineage4     | PRJNA413593 | S   | S | S   | n/a | S | S | S |
| 10s195   | British Columbia Centre for Disease Control | Canada  | Beijing      | PRJNA413593 | S   | S | S   | n/a | S | S | S |
| A7s217   | British Columbia Centre for Disease Control | Canada  | Beijing      | PRJNA413593 | S   | S | S   | n/a | S | S | S |
| A8s145   | British Columbia Centre for Disease Control | Canada  | Delhi        | PRJNA413593 | S   | S | S   | n/a | S | S | S |
| A6s145   | British Columbia Centre for Disease Control | Canada  | lineage4     | PRJNA413593 | S   | S | S   | n/a | S | S | S |
| 14s063   | British Columbia Centre for Disease Control | Canada  | EAI          | PRJNA413593 | S   | S | S   | n/a | S | S | S |
| 10s354   | British Columbia Centre for Disease Control | Canada  | EAI          | PRJNA413593 | S   | S | S   | n/a | S | S | S |
| 11s045   | British Columbia Centre for Disease Control | Canada  | S-type       | PRJNA413593 | S   | S | S   | n/a | S | S | S |
| A5s023   | British Columbia Centre for Disease Control | Canada  | lineage4     | PRJNA413593 | R   | S | S   | n/a | R | S | S |
| 12s051   | British Columbia Centre for Disease Control | Canada  | LAM          | PRJNA413593 | S   | S | S   | n/a | S | S | S |
| A6s400   | British Columbia Centre for Disease Control | Canada  | EAI          | PRJNA413593 | S   | S | S   | n/a | S | S | S |
| A5s137   | British Columbia Centre for Disease Control | Canada  | S-type       | PRJNA413593 | S   | S | S   | n/a | S | S | S |
| 13s450   | British Columbia Centre for Disease Control | Canada  | Delhi        | PRJNA413593 | S   | S | S   | n/a | S | S | S |
| A8s057   | British Columbia Centre for Disease Control | Canada  | Ural         | PRJNA413593 | S   | S | S   | n/a | S | S | S |
| 11s234   | British Columbia Centre for Disease Control | Canada  | Beijing      | PRJNA413593 | R   | S | S   | S   | R | S | S |
| A8s259   | British Columbia Centre for Disease Control | Canada  | Haarlem      | PRJNA413593 | S   | S | S   | n/a | S | S | S |
| 14s316   | British Columbia Centre for Disease Control | Canada  | EAI          | PRJNA413593 | R   | S | S   | S   | R | S | S |
| 12s384   | British Columbia Centre for Disease Control | Canada  | lineage4     | PRJNA413593 | S   | S | S   | n/a | S | S | S |
| A7s235   | British Columbia Centre for Disease Control | Canada  | Beijing      | PRJNA413593 | R   | R | R   | R   | R | R | R |
| A6s187   | British Columbia Centre for Disease Control | Canada  | Haarlem      | PRJNA413593 | S   | S | S   | n/a | S | S | S |
| 13s446   | British Columbia Centre for Disease Control | Canada  | Delhi        | PRJNA413593 | S   | S | S   | n/a | U | S | S |
| 11s386   | British Columbia Centre for Disease Control | Canada  | LAM          | PRJNA413593 | S   | S | S   | n/a | S | S | S |
| A6s025   | British Columbia Centre for Disease Control | Canada  | Beijing      | PRJNA413593 | S   | S | S   | n/a | S | U | S |
| A5s298   | British Columbia Centre for Disease Control | Canada  | EAI          | PRJNA413593 | S   | S | S   | n/a | S | S | U |
| A5s070   | British Columbia Centre for Disease Control | Canada  | S-type       | PRJNA413593 | S   | S | S   | n/a | S | U | S |
| A5s043   | British Columbia Centre for Disease Control | Canada  | Delhi        | PRJNA413593 | R   | S | S   | S   | R | S | S |
| A2s309   | British Columbia Centre for Disease Control | Canada  | Delhi        | PRJNA413593 | S   | S | S   | n/a | S | S | S |
| 14s308   | British Columbia Centre for Disease Control | Canada  | Beijing      | PRJNA413593 | R   | S | S   | S   | U | S | U |
| 10s171   | British Columbia Centre for Disease Control | Canada  | lineage4     | PRJNA413593 | S   | S | S   | n/a | S | S | S |
| A5s172   | British Columbia Centre for Disease Control | Canada  | Beijing      | PRJNA413593 | S   | S | S   | n/a | U | S | S |
| A9s079   | British Columbia Centre for Disease Control | Canada  | LAM          | PRJNA413593 | R   | S | R   | n/a | R | S | R |
| 12s025   | British Columbia Centre for Disease Control | Canada  | lineage4     | PRJNA413593 | R   | S | S   | S   | R | S | S |
| A8s323   | British Columbia Centre for Disease Control | Canada  | Delhi        | PRJNA413593 | R   | R | R   | R   | R | R | R |
| 11s357   | British Columbia Centre for Disease Control | Canada  | EAI          | PRJNA413593 | R   | S | S   | S   | R | S | S |
| A7s265   | British Columbia Centre for Disease Control | Canada  | EAI          | PRJNA413593 | n/a | S | S   | S   | S | S | S |
| A8s083   | British Columbia Centre for Disease Control | Canada  | lineage4     | PRJNA413593 | S   | S | S   | n/a | S | S | S |
| 12s343   | British Columbia Centre for Disease Control | Canada  | S-type       | PRJNA413593 | S   | S | S   | n/a | S | U | S |
| A5s131   | British Columbia Centre for Disease Control | Canada  | Beijing      | PRJNA413593 | S   | S | S   | n/a | S | S | S |
| 12s182   | British Columbia Centre for Disease Control | Canada  | Tur          | PRJNA413593 | R   | S | S   | S   | R | S | R |
| 10s312   | British Columbia Centre for Disease Control | Canada  | Ural         | PRJNA413593 | S   | S | S   | n/a | S | S | S |
| 10s348   | British Columbia Centre for Disease Control | Canada  | Beijing      | PRJNA413593 | S   | S | S   | n/a | S | S | S |
| 11s159   | British Columbia Centre for Disease Control | Canada  | LAM          | PRJNA413593 | S   | S | S   | n/a | S | S | U |
| A9s029   | British Columbia Centre for Disease Control | Canada  | S-type       | PRJNA413593 | S   | S | S   | n/a | U | S | S |
| 10s020   | British Columbia Centre for Disease Control | Canada  | Beijing      | PRJNA413593 | S   | S | S   | n/a | S | S | S |
| A7s267   | British Columbia Centre for Disease Control | Canada  | EAI          | PRJNA413593 | S   | S | S   | n/a | S | S | S |
| 10s291   | British Columbia Centre for Disease Control | Canada  | Ural         | PRJNA413593 | S   | S | S   | n/a | S | S | S |
| 13s095   | British Columbia Centre for Disease Control | Canada  | Haarlem      | PRJNA413593 | S   | S | S   | n/a | S | S | S |
| 11s411   | British Columbia Centre for Disease Control | Canada  | Beijing      | PRJNA413593 | S   | S | S   | n/a | S | S | S |
| 14s482   | British Columbia Centre for Disease Control | Canada  | Ural         | PRJNA413593 | S   | S | S   | n/a | S | S | S |
| 13s320   | British Columbia Centre for Disease Control | Canada  | Beijing      | PRJNA413593 | S   | S | S   | n/a | S | S | S |
| A8s004   | British Columbia Centre for Disease Control | Canada  | EAI          | PRJNA413593 | S   | S | S   | n/a | S | S | S |
| A7s159   | British Columbia Centre for Disease Control | Canada  | Ural         | PRJNA413593 | S   | S | S   | n/a | S | S | S |
| A9s356   | British Columbia Centre for Disease Control | Canada  | Delhi        | PRJNA413593 | S   | S | S   | n/a | S | S | S |
| A8s220   | British Columbia Centre for Disease Control | Canada  | Haarlem      | PRJNA413593 | S   | S | S   | n/a | S | S | S |
| 10s205   | British Columbia Centre for Disease Control | Canada  | Beijing      | PRJNA413593 | S   | S | S   | n/a | S | S | S |





























|                |                                                       |       |          |           |           |   |     |   |     |   |   |   |   |
|----------------|-------------------------------------------------------|-------|----------|-----------|-----------|---|-----|---|-----|---|---|---|---|
| 09_0716        | Yang et al. Lancet Infect Dis. 2017 Mar;17(3):275-284 | China | Beijing  | SRS935926 | SRP058221 | R | R   | S | n/a | R | R | S | S |
| 12_0583        | Yang et al. Lancet Infect Dis. 2017 Mar;17(3):275-284 | China | Beijing  | SRS935920 | SRP058221 | R | R   | R | n/a | R | R | R | S |
| BGI_252        | Zhang et al. Nat Genet. 2013 Oct;45(10):1255-60       | China | Beijing  | SR671867  |           | R | R   | S | n/a | R | R | U | R |
| BGI_HEN06035   | Zhang et al. Nat Genet. 2013 Oct;45(10):1255-60       | China | Beijing  | SR671856  |           | S | S   | S | n/a | S | S | S | S |
| BGI_B-160      | Zhang et al. Nat Genet. 2013 Oct;45(10):1255-60       | China | Beijing  | SR671723  |           | S | S   | S | n/a | S | R | S | S |
| BGI_LN228      | Zhang et al. Nat Genet. 2013 Oct;45(10):1255-60       | China | Beijing  | SR671796  |           | R | R   | R | n/a | R | R | R | U |
| BGI_J-x09105   | Zhang et al. Nat Genet. 2013 Oct;45(10):1255-60       | China | Beijing  | SR671735  |           | R | R   | S | n/a | R | R | U | S |
| BGI_SH171      | Zhang et al. Nat Genet. 2013 Oct;45(10):1255-60       | China | Beijing  | SR671808  |           | S | S   | S | n/a | S | S | S | S |
| BGI_GuangZ8    | Zhang et al. Nat Genet. 2013 Oct;45(10):1255-60       | China | Beijing  | SR671726  |           | R | R   | R | n/a | R | R | R | R |
| BGI_GZ066      | Zhang et al. Nat Genet. 2013 Oct;45(10):1255-60       | China | Beijing  | SR671843  |           | R | R   | S | n/a | R | R | U | S |
| BGI_J-x09061   | Zhang et al. Nat Genet. 2013 Oct;45(10):1255-60       | China | Beijing  | SR671734  |           | R | R   | S | n/a | R | R | S | S |
| BGI_140        | Zhang et al. Nat Genet. 2013 Oct;45(10):1255-60       | China | Beijing  | SR671722  |           | R | R   | S | n/a | R | R | U | R |
| BGI_FJ05189    | Zhang et al. Nat Genet. 2013 Oct;45(10):1255-60       | China | lineage4 | SR671757  |           | R | R   | S | n/a | U | R | R | R |
| BGI_GuangZ0016 | Zhang et al. Nat Genet. 2013 Oct;45(10):1255-60       | China | S-type   | SR671861  |           | R | R   | S | n/a | R | R | R | R |
| BGI_GuangZ0026 | Zhang et al. Nat Genet. 2013 Oct;45(10):1255-60       | China | S-type   | SR671862  |           | R | R   | R | n/a | R | R | U | R |
| BGI_XJ06007    | Zhang et al. Nat Genet. 2013 Oct;45(10):1255-60       | China | Beijing  | SR671871  |           | S | S   | S | n/a | S | S | S | S |
| BGI_GZ119      | Zhang et al. Nat Genet. 2013 Oct;45(10):1255-60       | China | Beijing  | SR671837  |           | R | R   | R | n/a | R | R | R | U |
| BGI_LN373      | Zhang et al. Nat Genet. 2013 Oct;45(10):1255-60       | China | Beijing  | SR671854  |           | R | R   | R | n/a | R | R | F | U |
| BGI_144        | Zhang et al. Nat Genet. 2013 Oct;45(10):1255-60       | China | Beijing  | SR671869  |           | R | R   | S | n/a | R | R | U | U |
| BGI_LN236      | Zhang et al. Nat Genet. 2013 Oct;45(10):1255-60       | China | Beijing  | SR671799  |           | R | R   | R | n/a | R | R | U | R |
| BGI_XZ06030    | Zhang et al. Nat Genet. 2013 Oct;45(10):1255-60       | China | lineage4 | SR671838  |           | R | R   | S | n/a | R | R | F | S |
| BGI_SH166      | Zhang et al. Nat Genet. 2013 Oct;45(10):1255-60       | China | Beijing  | SR671806  |           | R | R   | R | n/a | R | R | R | F |
| BGI_FJ07070    | Zhang et al. Nat Genet. 2013 Oct;45(10):1255-60       | China | Beijing  | SR671842  |           | R | R   | R | n/a | R | R | R | R |
| BGI_SH311      | Zhang et al. Nat Genet. 2013 Oct;45(10):1255-60       | China | Beijing  | SR671815  |           | R | R   | R | n/a | R | R | R | R |
| BGI_NM11008    | Zhang et al. Nat Genet. 2013 Oct;45(10):1255-60       | China | Beijing  | SR671870  |           | S | S   | S | n/a | S | S | S | S |
| BGI_SH327      | Zhang et al. Nat Genet. 2013 Oct;45(10):1255-60       | China | Beijing  | SR671816  |           | R | R   | S | n/a | S | R | F | R |
| BGI_NM11014    | Zhang et al. Nat Genet. 2013 Oct;45(10):1255-60       | China | Beijing  | SR671876  |           | S | S   | S | n/a | S | S | S | S |
| BGI_U-x09006   | Zhang et al. Nat Genet. 2013 Oct;45(10):1255-60       | China | Beijing  | SR671745  |           | R | R   | S | n/a | R | R | S | S |
| BGI_L-x09102   | Zhang et al. Nat Genet. 2013 Oct;45(10):1255-60       | China | Beijing  | SR671736  |           | R | R   | S | n/a | R | R | U | S |
| BGI_SHK05178   | Zhang et al. Nat Genet. 2013 Oct;45(10):1255-60       | China | lineage4 | SR671853  |           | R | R   | S | n/a | U | R | R | S |
| BGI_FJ05136    | Zhang et al. Nat Genet. 2013 Oct;45(10):1255-60       | China | Beijing  | SR671752  |           | R | R   | S | n/a | R | R | R | F |
| BGI_XJ06090    | Zhang et al. Nat Genet. 2013 Oct;45(10):1255-60       | China | lineage4 | SR671874  |           | S | S   | S | n/a | S | S | S | S |
| BGI_LN270      | Zhang et al. Nat Genet. 2013 Oct;45(10):1255-60       | China | Beijing  | SR671801  |           | R | R   | S | n/a | R | R | R | S |
| BGI_BJ05026    | Zhang et al. Nat Genet. 2013 Oct;45(10):1255-60       | China | lineage4 | SR671859  |           | S | S   | S | n/a | S | S | S | S |
| BGI_GZ10125    | Zhang et al. Nat Genet. 2013 Oct;45(10):1255-60       | China | lineage4 | SR671768  |           | R | R   | S | n/a | R | R | S | S |
| BGI_V-x09011   | Zhang et al. Nat Genet. 2013 Oct;45(10):1255-60       | China | Beijing  | SR671746  |           | R | R   | S | n/a | R | R | S | S |
| BGI_XZ06017    | Zhang et al. Nat Genet. 2013 Oct;45(10):1255-60       | China | Beijing  | SR671848  |           | R | R   | S | n/a | R | R | U | S |
| BGI_XZ06217    | Zhang et al. Nat Genet. 2013 Oct;45(10):1255-60       | China | Beijing  | SR671840  |           | R | R   | R | n/a | R | R | U | S |
| BGI_Q-x09122   | Zhang et al. Nat Genet. 2013 Oct;45(10):1255-60       | China | Beijing  | SR671742  |           | R | R   | S | n/a | R | R | R | F |
| BGI_Y-x09033   | Zhang et al. Nat Genet. 2013 Oct;45(10):1255-60       | China | Beijing  | SR671747  |           | S | S   | S | n/a | S | S | S | S |
| BGI_336        | Zhang et al. Nat Genet. 2013 Oct;45(10):1255-60       | China | Beijing  | SR671866  |           | R | R   | R | n/a | R | R | R | R |
| BGI_SH361      | Zhang et al. Nat Genet. 2013 Oct;45(10):1255-60       | China | Beijing  | SR671820  |           | R | R   | S | n/a | R | R | R | S |
| BGI_NM11011    | Zhang et al. Nat Genet. 2013 Oct;45(10):1255-60       | China | Beijing  | SR671877  |           | S | S   | S | n/a | S | S | S | S |
| BGI_SH127      | Zhang et al. Nat Genet. 2013 Oct;45(10):1255-60       | China | Beijing  | SR671795  |           | R | R   | S | n/a | R | R | R | U |
| BGI_SH292      | Zhang et al. Nat Genet. 2013 Oct;45(10):1255-60       | China | Beijing  | SR671813  |           | R | R   | R | n/a | U | R | R | S |
| BGI_A-x09095   | Zhang et al. Nat Genet. 2013 Oct;45(10):1255-60       | China | Beijing  | SR671727  |           | R | R   | S | n/a | U | R | F | F |
| BGI_40195      | Zhang et al. Nat Genet. 2013 Oct;45(10):1255-60       | China | Beijing  | SR671780  |           | R | R   | S | n/a | F | R | F | S |
| BGI_GuangZ0017 | Zhang et al. Nat Genet. 2013 Oct;45(10):1255-60       | China | Beijing  | SR671864  |           | R | R   | R | n/a | R | R | R | R |
| BGI_X-x09017   | Zhang et al. Nat Genet. 2013 Oct;45(10):1255-60       | China | Beijing  | SR671738  |           | R | R   | S | n/a | R | R | R | S |
| BGI_GZ104      | Zhang et al. Nat Genet. 2013 Oct;45(10):1255-60       | China | Beijing  | SR671845  |           | R | R   | R | n/a | U | R | R | S |
| BGI_SH519      | Zhang et al. Nat Genet. 2013 Oct;45(10):1255-60       | China | Beijing  | SR671798  |           | R | R   | S | n/a | R | R | U | S |
| BGI_P-x09119   | Zhang et al. Nat Genet. 2013 Oct;45(10):1255-60       | China | Delhi    | SR671741  |           | S | S   | S | n/a | S | S | S | S |
| BGI_SH390      | Zhang et al. Nat Genet. 2013 Oct;45(10):1255-60       | China | Beijing  | SR671822  |           | R | R   | R | n/a | R | R | R | R |
| BGI_LN151      | Zhang et al. Nat Genet. 2013 Oct;45(10):1255-60       | China | Beijing  | SR671792  |           | S | S   | S | n/a | S | S | S | S |
| BGI_GZ10115    | Zhang et al. Nat Genet. 2013 Oct;45(10):1255-60       | China | Beijing  | SR671771  |           | R | R   | R | n/a | R | R | R | U |
| BGI_315        | Zhang et al. Nat Genet. 2013 Oct;45(10):1255-60       | China | Beijing  | SR671724  |           | R | R   | R | n/a | R | R | R | R |
| BGI_SH287      | Zhang et al. Nat Genet. 2013 Oct;45(10):1255-60       | China | Beijing  | SR671812  |           | R | R   | S | n/a | R | R | R | U |
| BGI_FJ05121    | Zhang et al. Nat Genet. 2013 Oct;45(10):1255-60       | China | lineage4 | SR671750  |           | R | R   | S | n/a | R | R | R | F |
| BGI_FJ05132    | Zhang et al. Nat Genet. 2013 Oct;45(10):1255-60       | China | lineage4 | SR671751  |           | R | R   | R | n/a | R | R | R | R |
| BGI_FJ05141    | Zhang et al. Nat Genet. 2013 Oct;45(10):1255-60       | China | Beijing  | SR671841  |           | R | R   | R | n/a | R | R | R | F |
| BGI_R-x09105   | Zhang et al. Nat Genet. 2013 Oct;45(10):1255-60       | China | Beijing  | SR671743  |           | R | R   | S | n/a | R | R | U | S |
| BGI_FJ05112    | Zhang et al. Nat Genet. 2013 Oct;45(10):1255-60       | China | Beijing  | SR671748  |           | R | R   | R | n/a | R | R | F | R |
| BGI_10         | Zhang et al. Nat Genet. 2013 Oct;45(10):1255-60       | China | LAM      | SR671775  |           | S | S   | S | n/a | S | S | S | S |
| BGI_LN175      | Zhang et al. Nat Genet. 2013 Oct;45(10):1255-60       | China | Beijing  | SR671797  |           | R | R   | R | n/a | R | R | R | R |
| BGI_FJ05474    | Zhang et al. Nat Genet. 2013 Oct;45(10):1255-60       | China | S-type   | SR671764  |           | S | S   | S | n/a | S | S | S | S |
| BGI_LN007      | Zhang et al. Nat Genet. 2013 Oct;45(10):1255-60       | China | Beijing  | SR671788  |           | S | S   | S | n/a | S | S | U | S |
| BGI_GuangZ29   | Zhang et al. Nat Genet. 2013 Oct;45(10):1255-60       | China | S-type   | SR671790  |           | R | R   | R | n/a | S | U | S | S |
| BGI_XZ06194    | Zhang et al. Nat Genet. 2013 Oct;45(10):1255-60       | China | Beijing  | SR671851  |           | R | R   | R | n/a | R | R | R | R |
| BGI_322        | Zhang et al. Nat Genet. 2013 Oct;45(10):1255-60       | China | Beijing  | SR671720  |           | R | R   | R | n/a | R | R | R | S |
| BGI_GZ077      | Zhang et al. Nat Genet. 2013 Oct;45(10):1255-60       | China | Beijing  | SR671834  |           | R | R   | R | n/a | R | R | S | S |
| BGI_SH396      | Zhang et al. Nat Genet. 2013 Oct;45(10):1255-60       | China | Beijing  | SR671823  |           | S | S   | S | n/a | S | S | S | S |
| BGI_LN018      | Zhang et al. Nat Genet. 2013 Oct;45(10):1255-60       | China | Beijing  | SR671855  |           | R | R   | R | n/a | R | R | U | R |
| BGI_LN230      | Zhang et al. Nat Genet. 2013 Oct;45(10):1255-60       | China | Beijing  | SR671829  |           | R | R   | S | n/a | R | R | R | S |
| BGI_GuangZ0008 | Zhang et al. Nat Genet. 2013 Oct;45(10):1255-60       | China | Beijing  | SR671863  |           | R | R   | R | n/a | R | R | R | R |
| BGI_XZ06055    | Zhang et al. Nat Genet. 2013 Oct;45(10):1255-60       | China | lineage4 | SR671850  |           | R | R   | R | n/a | R | R | R | U |
| BGI_GuangZ6    | Zhang et al. Nat Genet. 2013 Oct;45(10):1255-60       | China | S-type   | SR671725  |           | R | R   | R | n/a | R | R | R | R |
| BGI_HEN05034   | Zhang et al. Nat Genet. 2013 Oct;45(10):1255-60       | China | Beijing  | SR671857  |           | R | R   | R | n/a | R | R | S | S |
| BGI_LN077      | Zhang et al. Nat Genet. 2013 Oct;45(10):1255-60       | China | Beijing  | SR671787  |           | R | R   | R | n/a | R | R | R | R |
| BGI_FJ05060    | Zhang et al. Nat Genet. 2013 Oct;45(10):1255-60       | China | S-type   | SR671762  |           | S | S   | S | n/a | S | S | U | S |
| BGI_G-x09148   | Zhang et al. Nat Genet. 2013 Oct;45(10):1255-60       | China | Beijing  | SR671732  |           | R | R   | R | n/a | R | R | S | S |
| BGI_XJ06017    | Zhang et al. Nat Genet. 2013 Oct;45(10):1255-60       | China | S-type   | SR671878  |           | S | S   | S | n/a | S | S | S | S |
| BGI_GZ10108    | Zhang et al. Nat Genet. 2013 Oct;45(10):1255-60       | China | Beijing  | SR671765  |           | R | R   | R | n/a | R | R | R | S |
| BGI_GZ10145    | Zhang et al. Nat Genet. 2013 Oct;45(10):1255-60       | China | lineage4 | SR671773  |           | S | S   | S | n/a | S | S | S | S |
| BGI_SH068      | Zhang et al. Nat Genet. 2013 Oct;45(10):1255-60       | China | Beijing  | SR671811  |           | R | R   | R | n/a | R | R | R | R |
| BGI_SH404      | Zhang et al. Nat Genet. 2013 Oct;45(10):1255-60       | China | Beijing  | SR671825  |           | R | R   | R | n/a | R | R | R | R |
| BGI_SH002      | Zhang et al. Nat Genet. 2013 Oct;45(10):1255-60       | China | Beijing  | SR671804  |           | R | R   | R | n/a | R | R | R | F |
| BGI_SH060      | Zhang et al. Nat Genet. 2013 Oct;45(10):1255-60       | China | Beijing  | SR671810  |           | R | R   | R | n/a | R | R | R | R |
| BGI_GZ126      | Zhang et al. Nat Genet. 2013 Oct;45(10):1255-60       | China | lineage4 | SR671846  |           | S | S   | S | n/a | S | S | S | S |
| BGI_BJ05010    | Zhang et al. Nat Genet. 2013 Oct;45(10):1255-60       | China | Beijing  | SR671858  |           | S | S   | S | n/a | S | S | S | S |
| BGI_SH477      | Zhang et al. Nat Genet. 2013 Oct;45(10):1255-60       | China | Beijing  | SR671793  |           | S | S   | S | n/a | S | S | S | S |
| BGI_FJ09132    | Zhang et al. Nat Genet. 2013 Oct;45(10):1255-60       | China | Beijing  | SR671754  |           | R | R   | R | n/a | R | R | R | F |
| BGI_GuangZ24   | Zhang et al. Nat Genet. 2013 Oct;45(10):1255-60       | China | Beijing  | SR671789  |           | R | R   | S | n/a | R | R | R | R |
| BGI_FJ09114    | Zhang et al. Nat Genet. 2013 Oct;45(10):1255-60       | China | Beijing  | SR671756  |           | R | R   | R | n/a | R | R | R | R |
| BGI_GZ10059    | Zhang et al. Nat Genet. 2013 Oct;45(10):1255-60       | China | lineage4 | SR671769  |           | R | R   | R | n/a | R | R | R | S |
| BGI_E-x09109   | Zhang et al. Nat Genet. 2013 Oct;45(10):1255-60       | China | Beijing  | SR671730  |           | S | S   | S | n/a | S | S | S | S |
| BGI_SH298      | Zhang et al. Nat Genet. 2013 Oct;45(10):1255-60       | China | Beijing  | SR671814  |           | S | S   | S | n/a | S | S | S | S |
| BGI_143        | Zhang et al. Nat Genet. 2013 Oct;45(10):1255-60       | China | lineage4 | SR671868  |           | R | R   | R | n/a | R | R | U | F |
| BGI_SH147      | Zhang et al. Nat Genet. 2013 Oct;45(10):1255-60       | China | Beijing  | SR671805  |           | S | S   | S | n/a | S | S | S | S |
| BGI_GZ113      | Zhang et al. Nat Genet. 2013 Oct;45(10):1255-60       | China | Beijing  | SR671836  |           | R | R   | S | n/a | U | S | S | S |
| BGI_SH400      | Zhang et al. Nat Genet. 2013 Oct;45(10):1255-60       | China | Beijing  | SR671824  |           | R | R   | S | n/a | R | R | R | R |
| BGI_BJ05043    | Zhang et al. Nat Genet. 2013 Oct;45(10):1255-60       | China | S-type   | SR671860  |           | S | S   | S | n/a | S | S | U | S |
| BGI_SH415      | Zhang et al. Nat Genet. 2013 Oct;45(10):1255-60       | China | Beijing  | SR671826  |           | R | R   | R | n/a | R | R | R | R |
| BGI_SH340      | Zhang et al. Nat Genet. 2013 Oct;45(10):1255-60       | China | Beijing  | SR671819  |           | R | R</ |   |     |   |   |   |   |











|                  |                 |             |              |   |   |   |     |   |   |   |   |
|------------------|-----------------|-------------|--------------|---|---|---|-----|---|---|---|---|
| Italy_MGITTOUNAW | Italy_MGITstudy | Italy       | Tur          | S | S | S | S   | S | S | S | S |
| Italy_MGITVOFLO  | Italy_MGITstudy | Italy       | lineage4     | S | S | S | S   | S | S | S | S |
| Italy_MGITPALG2  | Italy_MGITstudy | Italy       | LAM          | S | S | S | S   | S | F | S | S |
| Italy_MGITAMBF   | Italy_MGITstudy | Italy       | Haarlem      | S | S | S | S   | S | S | S | S |
| Italy_MGIT72     | Italy_MGITstudy | Italy       | Ural         | S | S | S | S   | S | S | S | S |
| Italy_MGIT42     | Italy_MGITstudy | Italy       | Beijing      | S | S | S | S   | S | S | S | S |
| Italy_MGIT46     | Italy_MGITstudy | Italy       | Haarlem      | S | S | S | S   | S | S | S | S |
| Italy_MGIT121    | Italy_MGITstudy | Italy       | lineage4     | S | S | S | S   | S | S | S | S |
| Italy_MGITMELAL  | Italy_MGITstudy | Italy       | S-type       | S | S | S | S   | S | S | S | S |
| Italy_MGITPIMO   | Italy_MGITstudy | Italy       |              | R | S | S | S   | U | S | S | S |
| Italy_MGITMARK   | Italy_MGITstudy | Italy       | lineage4     | S | S | S | S   | U | F | S | S |
| Italy_MGIT86     | Italy_MGITstudy | Italy       | LAM          | S | S | S | S   | S | S | S | S |
| Italy_MGIT74     | Italy_MGITstudy | Italy       | Delhi        | S | S | S | S   | S | S | S | S |
| Italy_MGIT_BENP  | Italy_MGITstudy | Italy       | Haarlem      | S | S | S | S   | F | S | S | S |
| Italy_MGIT88     | Italy_MGITstudy | Italy       | Haarlem      | S | S | S | S   | S | S | S | S |
| Italy_MGITBEQU   | Italy_MGITstudy | Italy       | EAI          | S | S | S | S   | S | S | S | S |
| Italy_MGIT76     | Italy_MGITstudy | Italy       | West Africar | S | S | S | S   | S | U | U | S |
| Italy_MGIT54     | Italy_MGITstudy | Italy       | Haarlem      | S | S | S | S   | U | S | S | S |
| Italy_MGIT117    | Italy_MGITstudy | Italy       | S-type       | S | S | S | S   | S | S | S | S |
| Italy_MGIT64     | Italy_MGITstudy | Italy       | lineage4     | S | S | S | S   | S | S | S | S |
| Italy_MGIT44     | Italy_MGITstudy | Italy       | EAI          | S | S | S | S   | S | S | S | S |
| Italy_MGIT98     | Italy_MGITstudy | Italy       | Beijing      | S | S | S | S   | S | F | S | S |
| Italy_MGIT96     | Italy_MGITstudy | Italy       | Haarlem      | S | S | S | S   | F | S | S | F |
| Italy_MGIT108    | Italy_MGITstudy | Italy       | Haarlem      | S | S | S | S   | S | S | U | S |
| Italy_MGIT65     | Italy_MGITstudy | Italy       | Haarlem      | S | S | S | S   | S | S | S | S |
| Italy_MGIT62     | Italy_MGITstudy | Italy       | Haarlem      | S | S | S | S   | S | S | S | S |
| Italy_MGIT77     | Italy_MGITstudy | Italy       | EAI          | S | S | S | S   | S | S | S | S |
| Italy_MGITDIYA   | Italy_MGITstudy | Italy       |              | R | S | S | S   | R | S | S | S |
| Italy_MGIT50     | Italy_MGITstudy | Italy       | Beijing      | S | S | S | n/a | S | S | R | R |
| Italy_MGIT52     | Italy_MGITstudy | Italy       | lineage4     | R | R | R | R   | R | R | R | R |
| Italy_MGIT80     | Italy_MGITstudy | Italy       | Haarlem      | S | S | S | S   | S | S | S | S |
| Italy_MGIT69     | Italy_MGITstudy | Italy       | Tur          | S | S | S | S   | S | S | S | S |
| Italy_MGIT83     | Italy_MGITstudy | Italy       | lineage4     | S | S | S | S   | S | F | U | S |
| Italy_MGIT102    | Italy_MGITstudy | Italy       | Haarlem      | S | S | S | R   | S | S | S | R |
| Italy_MGIT90     | Italy_MGITstudy | Italy       | Haarlem      | S | S | S | S   | S | S | U | S |
| Italy_MGIT53     | Italy_MGITstudy | Italy       | lineage4     | R | R | R | R   | R | F | R | R |
| Italy_MGIT59     | Italy_MGITstudy | Italy       | Haarlem      | S | S | S | S   | S | S | S | S |
| Italy_MGITKEN    | Italy_MGITstudy | Italy       | Beijing      | S | S | S | S   | S | S | S | S |
| Italy_MGITCROCO  | Italy_MGITstudy | Italy       | lineage4     | S | S | S | S   | F | S | U | S |
| Italy_MGIT60     | Italy_MGITstudy | Italy       | Uganda       | S | S | S | S   | S | S | S | S |
| Italy_MGIT_PAGGL | Italy_MGITstudy | Italy       | lineage4     | S | S | S | S   | F | S | S | S |
| Italy_MGIT79     | Italy_MGITstudy | Italy       | EAI          | S | S | S | S   | S | S | S | S |
| Italy_MGIT5OW    | Italy_MGITstudy | Italy       | Haarlem      | S | S | S | S   | F | S | S | S |
| Italy_MGIT51     | Italy_MGITstudy | Italy       | LAM          | R | S | S | S   | R | S | S | S |
| Italy_MGIT73     | Italy_MGITstudy | Italy       | Haarlem      | S | S | S | S   | S | S | S | S |
| Italy_MGIT100    | Italy_MGITstudy | Italy       | Haarlem      | S | S | S | S   | S | S | S | S |
| Italy_MGITDIMOU  | Italy_MGITstudy | Italy       | EAI          | S | S | S | S   | F | S | U | S |
| Italy_MGIT55     | Italy_MGITstudy | Italy       | Haarlem      | S | S | S | S   | S | S | S | S |
| Italy_MGIT99     | Italy_MGITstudy | Italy       | lineage4     | S | S | S | S   | S | S | U | S |
| Italy_MGIT92     | Italy_MGITstudy | Italy       | Haarlem      | S | S | S | S   | S | S | S | S |
| Italy_MGIT101    | Italy_MGITstudy | Italy       | S-type       | S | S | S | S   | S | S | S | S |
| Italy_MGIT43     | Italy_MGITstudy | Italy       |              | R | S | S | S   | R | S | S | S |
| Italy_MGITAH5    | Italy_MGITstudy | Italy       | Uganda       | S | S | S | S   | S | S | S | S |
| Italy_MGIT67     | Italy_MGITstudy | Italy       | West Africar | S | S | S | S   | S | U | U | S |
| Italy_MGIT94     | Italy_MGITstudy | Italy       | lineage4     | S | S | S | S   | S | S | S | S |
| Italy_MGIT_SABD  | Italy_MGITstudy | Italy       | lineage4     | S | S | S | S   | S | S | S | S |
| Italy_MGIT63     | Italy_MGITstudy | Italy       | EAI          | S | S | S | S   | S | S | S | S |
| Italy_MGITDPB    | Italy_MGITstudy | Italy       | West Africar | S | S | S | S   | S | U | U | S |
| Italy_MGIT_MANA  | Italy_MGITstudy | Italy       | S-type       | S | S | S | S   | S | S | S | S |
| Italy_MGIT113    | Italy_MGITstudy | Italy       | lineage4     | S | S | S | S   | S | S | S | S |
| Italy_MGIT97     | Italy_MGITstudy | Italy       | LAM          | S | S | S | S   | S | S | S | S |
| Italy_MGIT82     | Italy_MGITstudy | Italy       | West Africar | S | S | S | S   | S | U | U | S |
| Italy_MGIT107    | Italy_MGITstudy | Italy       | Beijing      | S | S | S | S   | S | S | S | S |
| Italy_MGIT114    | Italy_MGITstudy | Italy       | Haarlem      | S | S | S | S   | S | S | S | S |
| Italy_MGITTU     | Italy_MGITstudy | Italy       | lineage4     | S | S | S | S   | S | S | S | S |
| Italy_MGIT66     | Italy_MGITstudy | Italy       | Beijing      | R | S | S | S   | S | S | S | S |
| Italy_MGIT87     | Italy_MGITstudy | Italy       | LAM          | R | S | S | S   | R | F | S | S |
| Italy_MGIT47     | Italy_MGITstudy | Italy       | Ural         | S | S | S | S   | S | S | S | S |
| Italy_MGIT61     | Italy_MGITstudy | Italy       | lineage4     | S | S | S | S   | S | S | S | S |
| Italy_MGIT109    | Italy_MGITstudy | Italy       | Beijing      | S | S | S | S   | S | S | U | S |
| Italy_MGIT85     | Italy_MGITstudy | Italy       | LAM          | S | S | S | S   | S | F | R | S |
| Italy_MGIT116    | Italy_MGITstudy | Italy       | S-type       | S | S | S | S   | S | S | S | S |
| Italy_MGIT84     | Italy_MGITstudy | Italy       | LAM          | R | R | R | R   | R | F | R | R |
| Italy_MGITFRAU   | Italy_MGITstudy | Italy       | Haarlem      | S | S | S | S   | S | S | S | S |
| Italy_MGIT118    | Italy_MGITstudy | Italy       | lineage4     | S | S | S | S   | S | S | S | S |
| Italy_MGIT75     | Italy_MGITstudy | Italy       | LAM          | S | S | S | S   | S | S | S | S |
| Italy_MGIT5OW2   | Italy_MGITstudy | Italy       | Haarlem      | S | S | S | S   | F | S | S | S |
| Italy_MGIT105    | Italy_MGITstudy | Italy       | Haarlem      | S | S | S | S   | S | S | S | S |
| Italy_MGIT81     | Italy_MGITstudy | Italy       | Cameroon     | S | S | S | S   | S | F | S | S |
| Italy_MGITABOK   | Italy_MGITstudy | Italy       | Ghana        | S | S | S | S   | S | S | S | S |
| NLA009401354     | Harvard         | Netherlands | lineage4     | R | R | S | n/a | U | R | U | R |
| NLA009601030     | Harvard         | Netherlands | Delhi        | R | R | S | n/a | R | R | S | S |
| NLA000301128     | Harvard         | Netherlands | Haarlem      | R | R | R | S   | R | R | R | S |
| NLA009401480     | Harvard         | Netherlands | Tur          | R | R | S | n/a | R | R | S | S |
| NLA009900478     | Harvard         | Netherlands | LAM          | R | R | S | R   | R | R | R | R |
| NLA009901354     | Harvard         | Netherlands | Ural         | R | R | S | S   | R | R | R | R |
| NLA000201001     | Harvard         | Netherlands | Tur          | R | R | R | S   | R | R | R | S |
| NLA009900895     | Harvard         | Netherlands | Beijing      | R | R | R | S   | R | R | R | S |
| NLA009402429     | Harvard         | Netherlands | Uganda       | R | R | S | n/a | U | R | S | S |
| NLA000200042     | Harvard         | Netherlands | Beijing      | R | R | R | n/a | R | R | F | R |
| NLA000700569     | Harvard         | Netherlands | LAM          | R | R | R | R   | R | R | R | R |
| NLA000001768     | Harvard         | Netherlands | LAM          | R | R | S | S   | R | R | U | R |
| NLA000400122     | Harvard         | Netherlands | LAM          | R | R | S | S   | R | R | S | S |
| NLA000401745     | Harvard         | Netherlands | Beijing      | R | R | S | S   | R | R | S | U |
| NLA000301149     | Harvard         | Netherlands | Haarlem      | R | R | S | S   | R | R | S | S |
| NLA009601360     | Harvard         | Netherlands | LAM          | R | R | R | n/a | R | R | R | R |
| NLA000017744     | Harvard         | Netherlands | LAM          | R | R | R | n/a | R | R | R | S |
| NLA000801695     | Harvard         | Netherlands | Beijing      | R | R | R | n/a | R | R | U | R |
| NLA009901304     | Harvard         | Netherlands | lineage4     | R | R | R | n/a | U | R | R | U |
| NLA000300848     | Harvard         | Netherlands | Haarlem      | R | R | R | S   | R | F | F | S |
| NLA009501837     | Harvard         | Netherlands | Haarlem      | R | R | S | n/a | R | R | S | R |
| NLA009702191     | Harvard         | Netherlands | Tur          | R | R | S | S   | R | R | S | S |
| NLA009802070     | Harvard         | Netherlands | EAI          | R | R | R | R   | R | R | R | R |
| NLA009702403     | Harvard         | Netherlands | Cameroon     | R | R | S | S   | R | R | S | R |
| NLA000017891     | Harvard         | Netherlands | LAM          | R | R | R | S   | R | R | R | S |
| NLA009501599     | Harvard         | Netherlands | M. bovis     | R | R | R | n/a | R | R | R | R |
| NLA000016604     | Harvard         | Netherlands | Haarlem      | R | R | S | n/a | R | R | S | U |
| NLA000701259     | Harvard         | Netherlands | Beijing      | R | R | R | R   | R | R | R | R |
| NLA009700174     | Harvard         | Netherlands | Haarlem      | R | R | S | S   | R | R | U | S |
| NLA009400010     | Harvard         | Netherlands | Delhi        | R | R | S | n/a | U | R | S | F |
| NLA000102124     | Harvard         | Netherlands | LAM          | R | R | R | S   | R | R | S | R |
| NLA009600800     | Harvard         | Netherlands | EAI          | R | R | S | n/a | R | R | S | S |
| NLA009701938     | Harvard         | Netherlands | EAI          | R | R | S | n/a | R | R | S | S |
| NLA000400074     | Harvard         | Netherlands | Ural         | R | R | R | R   | R | R | R | R |
| NLA000201392     | Harvard         | Netherlands | Beijing      | R | R | R | S   | R | R | R | R |
| NLA000101954     | Harvard         | Netherlands | Ghana        | R | R | S | S   | R | R | S | S |





|       |             |             |          |     |   |     |     |   |   |   |   |
|-------|-------------|-------------|----------|-----|---|-----|-----|---|---|---|---|
| NL304 | Netherlands | Netherlands | lineage4 | S   | S | S   | S   | S | S | U | S |
| NL534 | Netherlands | Netherlands | lineage4 | S   | S | S   | S   | S | S | S | S |
| NL485 | Netherlands | Netherlands | EAI      | S   | S | S   | S   | S | S | S | S |
| NL309 | Netherlands | Netherlands | Ghana    | S   | S | S   | n/a | S | S | S | S |
| NL315 | Netherlands | Netherlands | lineage4 | S   | S | S   | S   | S | S | S | S |
| NL108 | Netherlands | Netherlands | Delhi    | S   | S | S   | S   | S | S | S | S |
| NL156 | Netherlands | Netherlands | Delhi    | S   | S | S   | S   | S | U | S | S |
| NL414 | Netherlands | Netherlands | LAM      | S   | S | S   | S   | S | S | S | S |
| NL382 | Netherlands | Netherlands | lineage4 | S   | S | S   | S   | S | S | S | S |
| NL275 | Netherlands | Netherlands | LAM      | R   | S | S   | S   | R | S | R | S |
| NL563 | Netherlands | Netherlands | lineage4 | S   | S | S   | n/a | S | S | S | S |
| NL549 | Netherlands | Netherlands | LAM      | S   | S | S   | S   | S | S | S | S |
| NL003 | Netherlands | Netherlands | Haarlem  | S   | S | S   | S   | S | S | S | S |
| NL082 | Netherlands | Netherlands | EAI      | S   | S | S   | S   | S | S | S | S |
| NL439 | Netherlands | Netherlands | LAM      | S   | S | S   | S   | S | S | U | S |
| NL072 | Netherlands | Netherlands | Delhi    | R   | R | n/a | S   | R | R | R | S |
| NL178 | Netherlands | Netherlands | EAI      | R   | S | S   | S   | R | S | S | S |
| NL354 | Netherlands | Netherlands | Tur      | S   | S | S   | n/a | S | S | S | S |
| NL471 | Netherlands | Netherlands | lineage4 | S   | S | S   | S   | S | S | S | S |
| NL445 | Netherlands | Netherlands | Cameroon | S   | S | S   | S   | S | S | S | S |
| NL409 | Netherlands | Netherlands | EAI      | S   | S | S   | S   | S | S | S | S |
| NL133 | Netherlands | Netherlands | Haarlem  | S   | S | S   | S   | S | S | S | S |
| NL126 | Netherlands | Netherlands | lineage4 | S   | S | S   | S   | S | S | S | S |
| NL018 | Netherlands | Netherlands | lineage4 | S   | S | S   | S   | S | S | S | S |
| NL583 | Netherlands | Netherlands | lineage4 | S   | S | S   | n/a | S | U | S | S |
| NL207 | Netherlands | Netherlands | EAI      | S   | S | S   | S   | S | S | S | S |
| NL480 | Netherlands | Netherlands | EAI      | S   | S | S   | S   | S | S | S | S |
| NL167 | Netherlands | Netherlands | LAM      | S   | S | S   | S   | S | S | S | S |
| NL380 | Netherlands | Netherlands | Haarlem  | S   | S | S   | S   | S | S | S | S |
| NL232 | Netherlands | Netherlands | LAM      | S   | S | S   | S   | S | S | S | S |
| NL204 | Netherlands | Netherlands | Haarlem  | S   | S | S   | S   | S | S | S | S |
| NL361 | Netherlands | Netherlands | Haarlem  | S   | S | S   | S   | S | S | U | S |
| NL456 | Netherlands | Netherlands | Haarlem  | S   | S | S   | S   | S | S | S | S |
| NL452 | Netherlands | Netherlands | Delhi    | S   | S | S   | S   | U | S | S | S |
| NL401 | Netherlands | Netherlands | EAI      | S   | S | S   | S   | S | S | S | S |
| NL152 | Netherlands | Netherlands | Cameroon | R   | R | S   | S   | R | R | S | S |
| NL435 | Netherlands | Netherlands | LAM      | S   | S | S   | S   | S | S | S | S |
| NL569 | Netherlands | Netherlands | LAM      | S   | S | S   | S   | S | S | S | S |
| NL012 | Netherlands | Netherlands | Beijing  | R   | S | S   | S   | R | S | S | S |
| NL479 | Netherlands | Netherlands | S-type   | S   | S | S   | S   | S | S | S | S |
| NL343 | Netherlands | Netherlands | Delhi    | S   | S | S   | S   | S | S | S | S |
| NL176 | Netherlands | Netherlands | LAM      | S   | S | S   | S   | S | S | S | S |
| NL104 | Netherlands | Netherlands | S-type   | S   | S | S   | n/a | S | S | U | S |
| NL599 | Netherlands | Netherlands | EAI      | S   | S | S   | S   | S | S | S | S |
| NL266 | Netherlands | Netherlands | Delhi    | S   | S | S   | S   | S | S | S | S |
| NL500 | Netherlands | Netherlands | EAI      | S   | S | S   | S   | S | S | S | S |
| NL295 | Netherlands | Netherlands | Delhi    | S   | S | S   | S   | S | S | S | S |
| NL069 | Netherlands | Netherlands | EAI      | S   | S | S   | S   | S | S | U | S |
| NL609 | Netherlands | Netherlands | LAM      | R   | S | S   | S   | R | S | S | S |
| NL134 | Netherlands | Netherlands | S-type   | S   | S | S   | n/a | S | S | U | S |
| NL043 | Netherlands | Netherlands | EAI      | S   | S | S   | S   | S | S | S | S |
| NL574 | Netherlands | Netherlands | EAI      | S   | S | S   | S   | S | S | S | S |
| NL611 | Netherlands | Netherlands | LAM      | S   | S | S   | S   | S | S | S | S |
| NL181 | Netherlands | Netherlands | LAM      | S   | S | S   | n/a | S | S | S | S |
| NL400 | Netherlands | Netherlands | lineage4 | S   | S | S   | S   | S | S | S | S |
| NL058 | Netherlands | Netherlands | S-type   | S   | S | S   | S   | S | S | S | S |
| NL572 | Netherlands | Netherlands | EAI      | S   | S | S   | R   | S | S | U | S |
| NL422 | Netherlands | Netherlands | Delhi    | S   | S | S   | S   | S | S | S | S |
| NL493 | Netherlands | Netherlands | LAM      | S   | S | S   | S   | S | S | S | S |
| NL586 | Netherlands | Netherlands | LAM      | S   | S | S   | S   | S | S | U | S |
| NL249 | Netherlands | Netherlands | LAM      | S   | S | S   | S   | S | S | S | S |
| NL283 | Netherlands | Netherlands | Delhi    | R   | R | n/a | R   | R | R | R | R |
| NL081 | Netherlands | Netherlands | EAI      | S   | S | S   | S   | S | S | S | S |
| NL404 | Netherlands | Netherlands | Haarlem  | S   | S | S   | S   | S | S | S | S |
| NL225 | Netherlands | Netherlands | S-type   | n/a | S | S   | S   | R | S | S | S |
| NL313 | Netherlands | Netherlands | EAI      | S   | S | S   | S   | R | S | S | S |
| NL592 | Netherlands | Netherlands | Delhi    | S   | S | S   | S   | S | S | S | S |
| NL042 | Netherlands | Netherlands | Beijing  | S   | S | S   | S   | S | S | S | S |
| NL415 | Netherlands | Netherlands | Delhi    | S   | S | S   | S   | S | S | S | S |
| NL490 | Netherlands | Netherlands | EAI      | S   | S | S   | S   | S | S | S | S |
| NL132 | Netherlands | Netherlands | S-type   | S   | S | S   | S   | S | S | S | S |
| NL088 | Netherlands | Netherlands | S-type   | S   | S | S   | n/a | S | S | U | S |
| NL005 | Netherlands | Netherlands | lineage4 | S   | S | S   | S   | S | S | S | S |
| NL379 | Netherlands | Netherlands | Haarlem  | S   | S | S   | S   | S | S | S | S |
| NL155 | Netherlands | Netherlands | Haarlem  | n/a | S | S   | S   | R | S | S | S |
| NL107 | Netherlands | Netherlands | Tur      | S   | S | S   | S   | S | S | S | S |
| NL154 | Netherlands | Netherlands | Tur      | S   | S | S   | S   | F | S | S | S |
| NL022 | Netherlands | Netherlands | Tur      | S   | S | S   | n/a | S | S | S | S |
| NL412 | Netherlands | Netherlands | lineage4 | S   | S | S   | S   | S | S | U | S |
| NL371 | Netherlands | Netherlands | Delhi    | S   | S | S   | S   | S | S | S | S |
| NL478 | Netherlands | Netherlands | Cameroon | S   | S | S   | S   | S | S | S | S |
| NL297 | Netherlands | Netherlands | Tur      | S   | S | S   | S   | S | S | S | S |
| NL221 | Netherlands | Netherlands | LAM      | S   | S | S   | S   | S | S | S | S |
| NL466 | Netherlands | Netherlands | Beijing  | S   | S | S   | S   | S | S | S | S |
| NL442 | Netherlands | Netherlands | Haarlem  | S   | S | S   | S   | S | S | S | S |
| NL571 | Netherlands | Netherlands | M. bovis | S   | S | S   | R   | S | S | S | R |
| NL171 | Netherlands | Netherlands | Beijing  | n/a | S | S   | S   | R | S | S | S |
| NL537 | Netherlands | Netherlands | Tur      | S   | S | S   | S   | S | S | S | S |
| NL296 | Netherlands | Netherlands | EAI      | S   | S | S   | S   | S | S | U | S |
| NL587 | Netherlands | Netherlands | Haarlem  | S   | S | S   | S   | S | S | U | S |
| NL095 | Netherlands | Netherlands | Delhi    | S   | S | S   | S   | S | S | U | S |
| NL458 | Netherlands | Netherlands | M. bovis | S   | S | S   | R   | S | S | S | R |
| NL405 | Netherlands | Netherlands | Cameroon | S   | S | S   | S   | S | S | U | S |
| NL120 | Netherlands | Netherlands | EAI      | S   | S | S   | R   | S | S | U | S |
| NL498 | Netherlands | Netherlands | lineage4 | S   | S | S   | S   | S | S | S | S |
| NL501 | Netherlands | Netherlands | LAM      | S   | S | S   | S   | S | S | S | S |
| NL163 | Netherlands | Netherlands | Haarlem  | S   | S | S   | n/a | S | S | S | S |
| NL157 | Netherlands | Netherlands | Haarlem  | S   | S | S   | S   | S | S | S | S |
| NL420 | Netherlands | Netherlands | Delhi    | R   | S | S   | S   | R | S | U | S |
| NL438 | Netherlands | Netherlands | LAM      | S   | S | S   | S   | S | U | S | S |
| NL166 | Netherlands | Netherlands | EAI      | S   | S | S   | S   | S | S | S | S |
| NL137 | Netherlands | Netherlands | Haarlem  | S   | S | S   | S   | S | U | S | S |
| NL170 | Netherlands | Netherlands | Tur      | R   | S | S   | S   | R | S | U | S |
| NL215 | Netherlands | Netherlands | lineage4 | S   | S | S   | S   | S | S | U | S |
| NL378 | Netherlands | Netherlands | Delhi    | S   | S | S   | S   | S | S | S | S |
| NL462 | Netherlands | Netherlands | Haarlem  | S   | S | S   | S   | S | S | S | S |
| NL535 | Netherlands | Netherlands | LAM      | S   | S | S   | S   | S | S | S | S |
| NL372 | Netherlands | Netherlands | Delhi    | S   | S | S   | S   | S | S | S | S |
| NL230 | Netherlands | Netherlands | Delhi    | S   | S | S   | S   | S | S | S | S |
| NL598 | Netherlands | Netherlands | Delhi    | S   | S | S   | S   | S | S | S | S |
| NL486 | Netherlands | Netherlands | Haarlem  | S   | S | S   | S   | S | S | S | S |
| NL308 | Netherlands | Netherlands | lineage4 | S   | S | S   | n/a | S | S | S | S |
| NL284 | Netherlands | Netherlands | Beijing  | S   | S | S   | S   | S | S | S | S |
| NL540 | Netherlands | Netherlands | Delhi    | S   | S | S   | S   | S | S | S | S |
| NL387 | Netherlands | Netherlands | Delhi    | S   | S | S   | S   | F | U | U | S |
| NL209 | Netherlands | Netherlands | Haarlem  | S   | S | S   | n/a | S | S | S | S |

|       |             |                          |   |   |     |     |   |   |   |   |
|-------|-------------|--------------------------|---|---|-----|-----|---|---|---|---|
| NL246 | Netherlands | Netherlands Haarlem      | S | S | S   | S   | S | S | S | S |
| NL381 | Netherlands | Netherlands lineage4     | S | S | S   | S   | S | S | S | S |
| NL292 | Netherlands | Netherlands lineage4     | S | S | S   | S   | S | S | S | S |
| NL180 | Netherlands | Netherlands Beijing      | S | S | S   | S   | S | S | S | S |
| NL538 | Netherlands | Netherlands Delhi        | S | S | S   | S   | S | S | S | S |
| NL048 | Netherlands | Netherlands lineage4     | S | S | S   | S   | S | S | S | S |
| NL289 | Netherlands | Netherlands LAM          | S | S | S   | S   | S | S | S | S |
| NL321 | Netherlands | Netherlands LAM          | S | S | S   | S   | S | S | S | S |
| NL511 | Netherlands | Netherlands EAI          | S | S | S   | S   | S | S | S | S |
| NL168 | Netherlands | Netherlands Haarlem      | S | S | S   | S   | S | S | S | S |
| NL408 | Netherlands | Netherlands lineage4     | S | S | S   | S   | S | S | S | S |
| NL255 | Netherlands | Netherlands M. caprae    | S | S | S   | S   | S | S | S | S |
| NL169 | Netherlands | Netherlands Haarlem      | S | S | S   | S   | S | S | S | S |
| NL546 | Netherlands | Netherlands lineage4     | S | S | S   | S   | S | S | S | S |
| NL350 | Netherlands | Netherlands lineage4     | S | S | S   | S   | S | S | S | S |
| NL578 | Netherlands | Netherlands Delhi        | S | S | S   | S   | S | S | S | S |
| NL144 | Netherlands | Netherlands Delhi        | S | S | S   | S   | S | S | S | S |
| NL397 | Netherlands | Netherlands Delhi        | S | S | S   | n/a | S | S | S | S |
| NL239 | Netherlands | Netherlands Delhi        | S | S | S   | S   | S | S | S | S |
| NL227 | Netherlands | Netherlands lineage4     | S | S | S   | S   | S | S | S | S |
| NL199 | Netherlands | Netherlands LAM          | S | S | S   | n/a | S | S | S | S |
| NL375 | Netherlands | Netherlands Delhi        | S | S | S   | S   | S | S | S | S |
| NL013 | Netherlands | Netherlands Delhi        | S | S | S   | S   | F | S | S | S |
| NL377 | Netherlands | Netherlands lineage4     | S | S | S   | S   | S | S | S | S |
| NL139 | Netherlands | Netherlands Delhi        | S | S | S   | S   | S | S | S | S |
| NL063 | Netherlands | Netherlands Haarlem      | S | S | S   | S   | S | S | S | S |
| NL318 | Netherlands | Netherlands lineage4     | S | S | S   | S   | S | S | S | S |
| NL179 | Netherlands | Netherlands Haarlem      | S | S | S   | S   | S | S | S | S |
| NL510 | Netherlands | Netherlands Haarlem      | S | S | S   | S   | S | S | S | S |
| NL234 | Netherlands | Netherlands EAI          | S | S | S   | S   | S | S | S | S |
| NL505 | Netherlands | Netherlands Haarlem      | S | S | S   | S   | S | S | S | S |
| NL294 | Netherlands | Netherlands Tur          | R | R | S   | S   | R | R | R | R |
| NL083 | Netherlands | Netherlands Haarlem      | S | S | S   | S   | S | S | S | S |
| NL183 | Netherlands | Netherlands LAM          | S | S | S   | S   | S | S | S | S |
| NL278 | Netherlands | Netherlands Ural         | S | S | S   | S   | S | S | S | S |
| NL521 | Netherlands | Netherlands Haarlem      | S | S | S   | S   | S | S | S | S |
| NL307 | Netherlands | Netherlands LAM          | S | S | S   | S   | S | S | S | S |
| NL595 | Netherlands | Netherlands Haarlem      | S | S | S   | S   | S | S | S | S |
| NL019 | Netherlands | Netherlands LAM          | S | S | S   | S   | S | S | S | S |
| NL527 | Netherlands | Netherlands Delhi        | S | S | S   | S   | S | S | S | S |
| NL484 | Netherlands | Netherlands Beijing      | S | S | S   | S   | S | S | S | S |
| NL582 | Netherlands | Netherlands Delhi        | S | S | S   | S   | S | S | S | S |
| NL413 | Netherlands | Netherlands Haarlem      | S | S | S   | S   | S | S | S | S |
| NL477 | Netherlands | Netherlands LAM          | S | S | S   | S   | S | S | S | S |
| NL268 | Netherlands | Netherlands BCG          | S | S | S   | R   | S | S | S | R |
| NL585 | Netherlands | Netherlands LAM          | S | S | S   | S   | S | S | S | S |
| NL252 | Netherlands | Netherlands Uganda       | S | S | S   | S   | S | S | S | S |
| NL281 | Netherlands | Netherlands Beijing      | S | S | S   | S   | S | S | U | S |
| NL436 | Netherlands | Netherlands West Africar | S | S | S   | S   | S | U | U | S |
| NL233 | Netherlands | Netherlands Haarlem      | S | S | S   | S   | S | S | S | S |
| NL551 | Netherlands | Netherlands Delhi        | S | S | S   | S   | S | S | S | S |
| NL305 | Netherlands | Netherlands Haarlem      | S | S | S   | S   | S | S | S | S |
| NL333 | Netherlands | Netherlands Beijing      | S | S | S   | S   | S | S | S | S |
| NL256 | Netherlands | Netherlands Haarlem      | S | S | S   | n/a | S | S | S | S |
| NL562 | Netherlands | Netherlands Haarlem      | S | S | S   | S   | S | S | S | S |
| NL038 | Netherlands | Netherlands Delhi        | S | S | S   | S   | S | S | S | S |
| NL312 | Netherlands | Netherlands Delhi        | S | S | S   | S   | S | S | S | S |
| NL025 | Netherlands | Netherlands Beijing      | S | S | S   | S   | S | S | S | S |
| NL314 | Netherlands | Netherlands Beijing      | S | S | S   | S   | S | S | S | S |
| NL533 | Netherlands | Netherlands Delhi        | S | S | S   | S   | S | S | S | S |
| NL614 | Netherlands | Netherlands Beijing      | S | S | S   | S   | U | S | S | S |
| NL050 | Netherlands | Netherlands Beijing      | S | S | S   | S   | U | S | U | S |
| NL216 | Netherlands | Netherlands lineage4     | S | S | S   | S   | S | S | S | S |
| NL389 | Netherlands | Netherlands LAM          | S | S | S   | S   | S | S | S | S |
| NL186 | Netherlands | Netherlands EAI          | S | S | S   | S   | S | U | U | S |
| NL002 | Netherlands | Netherlands EAI          | S | S | S   | S   | S | S | S | S |
| NL055 | Netherlands | Netherlands Uganda       | S | S | S   | S   | S | S | S | S |
| NL504 | Netherlands | Netherlands LAM          | S | S | S   | n/a | S | S | S | S |
| NL368 | Netherlands | Netherlands Delhi        | S | S | S   | S   | S | S | S | S |
| NL522 | Netherlands | Netherlands Delhi        | S | S | S   | S   | S | S | S | S |
| NL016 | Netherlands | Netherlands Haarlem      | S | S | S   | S   | S | S | S | S |
| NL223 | Netherlands | Netherlands LAM          | R | S | S   | S   | R | S | R | S |
| NL411 | Netherlands | Netherlands LAM          | S | S | S   | S   | S | S | S | S |
| NL074 | Netherlands | Netherlands LAM          | S | S | S   | S   | S | S | S | S |
| NL257 | Netherlands | Netherlands LAM          | S | S | S   | S   | S | S | S | S |
| NL218 | Netherlands | Netherlands EAI          | S | S | S   | S   | F | S | F | S |
| NL064 | Netherlands | Netherlands Delhi        | S | S | S   | S   | S | S | S | S |
| NL518 | Netherlands | Netherlands Haarlem      | S | S | S   | S   | S | S | S | S |
| NL460 | Netherlands | Netherlands Haarlem      | S | S | S   | S   | S | S | S | S |
| NL467 | Netherlands | Netherlands lineage4     | S | S | S   | S   | S | S | S | S |
| NL516 | Netherlands | Netherlands Tur          | R | R | n/a | R   | R | R | R | R |
| NL150 | Netherlands | Netherlands Delhi        | S | S | S   | S   | S | S | S | S |
| NL142 | Netherlands | Netherlands Delhi        | S | S | S   | S   | S | S | S | S |
| NL373 | Netherlands | Netherlands M. bovis     | S | S | S   | R   | S | S | S | R |
| NL506 | Netherlands | Netherlands Haarlem      | S | S | S   | S   | S | S | S | S |
| NL116 | Netherlands | Netherlands lineage4     | S | S | S   | n/a | S | S | S | S |
| NL384 | Netherlands | Netherlands EAI          | S | S | S   | S   | S | S | S | S |
| NL211 | Netherlands | Netherlands LAM          | R | S | S   | S   | R | S | S | S |
| NL519 | Netherlands | Netherlands Haarlem      | S | S | S   | S   | S | S | S | S |
| NL600 | Netherlands | Netherlands EAI          | S | S | S   | S   | S | U | S | S |
| NL612 | Netherlands | Netherlands lineage4     | S | S | S   | S   | S | S | R | S |
| NL031 | Netherlands | Netherlands Delhi        | S | S | S   | S   | S | S | S | S |
| NL581 | Netherlands | Netherlands Delhi        | S | S | S   | S   | S | S | U | S |
| NL357 | Netherlands | Netherlands Beijing      | S | S | S   | S   | S | S | U | S |
| NL602 | Netherlands | Netherlands Haarlem      | S | S | S   | S   | F | S | S | F |
| NL280 | Netherlands | Netherlands BCG          | S | S | S   | R   | S | S | S | R |
| NL206 | Netherlands | Netherlands LAM          | R | S | S   | S   | R | S | S | S |
| NL335 | Netherlands | Netherlands Beijing      | S | S | S   | S   | S | S | S | S |
| NL040 | Netherlands | Netherlands Haarlem      | S | S | S   | S   | S | S | S | S |
| NL593 | Netherlands | Netherlands lineage4     | S | S | S   | S   | S | S | S | S |
| NL604 | Netherlands | Netherlands Haarlem      | S | S | S   | S   | S | S | S | S |
| NL450 | Netherlands | Netherlands S-type       | S | S | S   | S   | S | S | S | S |
| NL226 | Netherlands | Netherlands lineage4     | S | S | S   | S   | S | S | S | S |
| NL191 | Netherlands | Netherlands lineage4     | S | S | S   | S   | S | S | S | U |
| NL558 | Netherlands | Netherlands LAM          | S | S | S   | S   | S | S | S | S |
| NL561 | Netherlands | Netherlands Haarlem      | S | S | S   | S   | U | S | S | S |
| NL259 | Netherlands | Netherlands M. bovis     | S | S | S   | R   | S | S | S | R |
| NL276 | Netherlands | Netherlands lineage4     | S | S | S   | S   | S | S | S | S |
| NL267 | Netherlands | Netherlands Tur          | S | S | S   | n/a | S | S | S | S |
| NL345 | Netherlands | Netherlands Delhi        | S | S | S   | S   | S | S | S | S |
| NL306 | Netherlands | Netherlands Haarlem      | S | S | S   | S   | S | S | S | S |
| NL298 | Netherlands | Netherlands Tur          | S | S | S   | n/a | S | S | S | F |
| NL141 | Netherlands | Netherlands EAI          | R | S | S   | S   | R | S | S | S |
| NL376 | Netherlands | Netherlands Delhi        | S | S | S   | S   | S | S | U | S |
| NL448 | Netherlands | Netherlands LAM          | S | S | S   | S   | S | S | S | S |
| NL547 | Netherlands | Netherlands M. orygis    | S | S | S   | n/a | S | S | U | S |



|              |             |                          |     |   |     |     |   |   |   |   |
|--------------|-------------|--------------------------|-----|---|-----|-----|---|---|---|---|
| NL446        | Netherlands | Netherlands EAI          | S   | S | S   | S   | S | S | S | S |
| NL103        | Netherlands | Netherlands LAM          | S   | S | S   | S   | S | S | S | S |
| NL499        | Netherlands | Netherlands Haarlem      | S   | S | S   | S   | S | S | S | S |
| NL608        | Netherlands | Netherlands LAM          | S   | S | S   | S   | S | S | U | S |
| NL028        | Netherlands | Netherlands lineage4     | S   | S | S   | S   | S | S | S | S |
| NL469        | Netherlands | Netherlands LAM          | S   | S | S   | S   | S | S | S | S |
| NL495        | Netherlands | Netherlands Haarlem      | S   | S | S   | S   | S | S | S | S |
| NL291        | Netherlands | Netherlands West Africar | S   | S | S   | S   | S | S | U | S |
| NL418        | Netherlands | Netherlands Beijing      | n/a | R | S   | S   | R | R | U | S |
| NL110        | Netherlands | Netherlands Delhi        | S   | S | S   | S   | S | S | S | S |
| NL489        | Netherlands | Netherlands lineage4     | S   | S | S   | S   | S | S | S | S |
| NL119        | Netherlands | Netherlands LAM          | R   | S | S   | S   | R | S | S | S |
| NL348        | Netherlands | Netherlands lineage4     | S   | S | S   | S   | S | S | S | S |
| NL388        | Netherlands | Netherlands Haarlem      | S   | S | S   | n/a | S | S | S | S |
| NL426        | Netherlands | Netherlands Delhi        | S   | S | S   | S   | S | S | S | S |
| NL394        | Netherlands | Netherlands Haarlem      | S   | S | S   | S   | S | S | S | S |
| NL523        | Netherlands | Netherlands lineage4     | S   | S | S   | S   | S | S | S | S |
| NL497        | Netherlands | Netherlands lineage4     | S   | S | S   | S   | S | S | S | S |
| NL465        | Netherlands | Netherlands Delhi        | S   | S | S   | S   | S | S | U | S |
| NL046        | Netherlands | Netherlands BCG          | S   | S | S   | R   | S | S | S | R |
| NL453        | Netherlands | Netherlands lineage4     | S   | S | S   | S   | F | S | U | S |
| NL020        | Netherlands | Netherlands Beijing      | S   | S | S   | S   | S | S | S | S |
| NL464        | Netherlands | Netherlands lineage4     | S   | S | S   | S   | S | S | S | S |
| NL240        | Netherlands | Netherlands Haarlem      | S   | S | S   | S   | S | S | S | S |
| NL017        | Netherlands | Netherlands Delhi        | S   | S | S   | S   | S | S | S | S |
| NL174        | Netherlands | Netherlands lineage4     | S   | S | S   | S   | S | S | S | S |
| NL482        | Netherlands | Netherlands lineage4     | S   | S | S   | S   | S | S | S | S |
| NL053        | Netherlands | Netherlands Delhi        | S   | S | S   | S   | S | S | S | S |
| NL070        | Netherlands | Netherlands Delhi        | S   | S | S   | S   | S | S | S | S |
| NL115        | Netherlands | Netherlands Haarlem      | S   | S | S   | S   | S | S | U | S |
| NL329        | Netherlands | Netherlands Haarlem      | S   | S | S   | S   | S | S | S | S |
| NL440        | Netherlands | Netherlands LAM          | S   | S | S   | S   | S | S | S | S |
| NL007        | Netherlands | Netherlands Haarlem      | S   | S | S   | S   | S | S | S | S |
| NL000        | Netherlands | Netherlands Delhi        | S   | S | S   | S   | S | S | U | S |
| NL124        | Netherlands | Netherlands LAM          | S   | S | S   | S   | S | S | S | S |
| NL236        | Netherlands | Netherlands EAI          | S   | S | S   | n/a | S | S | S | S |
| NL235        | Netherlands | Netherlands Cameroon     | S   | S | S   | S   | S | S | U | S |
| NL596        | Netherlands | Netherlands Cameroon     | S   | S | S   | S   | S | S | S | S |
| NL112        | Netherlands | Netherlands M. bovis     | S   | S | S   | R   | U | S | U | R |
| NL507        | Netherlands | Netherlands Haarlem      | S   | S | S   | n/a | S | S | U | S |
| NL557        | Netherlands | Netherlands Delhi        | S   | S | S   | n/a | S | S | S | S |
| NL301        | Netherlands | Netherlands Tur          | S   | S | S   | n/a | S | S | S | S |
| NL488        | Netherlands | Netherlands LAM          | S   | S | S   | S   | S | S | S | S |
| NL011        | Netherlands | Netherlands lineage4     | S   | S | S   | S   | S | S | S | S |
| NL311        | Netherlands | Netherlands Beijing      | S   | S | S   | S   | S | U | S | S |
| NL320        | Netherlands | Netherlands S-type       | S   | S | S   | S   | S | S | S | S |
| NL326        | Netherlands | Netherlands lineage4     | S   | S | S   | S   | S | S | S | S |
| NL589        | Netherlands | Netherlands Beijing      | S   | S | S   | S   | S | S | U | S |
| NL461        | Netherlands | Netherlands LAM          | S   | S | S   | S   | S | S | S | S |
| NL364        | Netherlands | Netherlands Beijing      | S   | S | S   | S   | S | S | S | S |
| NL272        | Netherlands | Netherlands Delhi        | S   | S | S   | S   | S | S | S | S |
| CRYPAK227-17 | Pakistan    | Pakistan Delhi           | R   | S | S   | S   | R | S | S | S |
| CRYPAK239-17 | Pakistan    | Pakistan Delhi           | R   | R | S   | R   | R | R | R | R |
| CRYPAK319-17 | Pakistan    | Pakistan Delhi           | R   | R | S   | R   | R | R | R | U |
| CRYPAK422-16 | Pakistan    | Pakistan Delhi           | R   | R | R   | R   | R | R | R | U |
| CRYPAK47-17  | Pakistan    | Pakistan X-type          | R   | R | R   | R   | R | R | R | R |
| CRYPAK479-16 | Pakistan    | Pakistan Delhi           | R   | R | R   | S   | R | R | R | R |
| CRYPAK434-16 | Pakistan    | Pakistan EAI             | R   | R | R   | S   | R | R | R | S |
| CRYPAK212-17 | Pakistan    | Pakistan Delhi           | R   | R | R   | R   | R | R | R | R |
| CRYPAK175-17 | Pakistan    | Pakistan Delhi           | R   | R | S   | S   | R | R | S | S |
| CRYPAK204-17 | Pakistan    | Pakistan Delhi           | S   | S | S   | S   | S | S | S | S |
| CRYPAK86-17  | Pakistan    | Pakistan Cameroon        | R   | R | S   | S   | R | R | S | R |
| CRYPAK560-16 | Pakistan    | Pakistan Beijing         | R   | R | S   | S   | R | F | F | S |
| CRYPAK273-17 | Pakistan    | Pakistan Delhi           | R   | R | S   | R   | R | R | R | F |
| CRYPAK439-16 | Pakistan    | Pakistan Delhi           | R   | R | S   | S   | S | S | S | S |
| CRYPAK470-16 | Pakistan    | Pakistan Delhi           | R   | R | R   | R   | R | R | R | R |
| 332-16       | Pakistan    | Pakistan Delhi           | R   | R | R   | S   | R | R | S | S |
| CRYPAK561-16 | Pakistan    | Pakistan Delhi           | R   | R | S   | S   | R | R | F | S |
| CRYPAK468-16 | Pakistan    | Pakistan Delhi           | R   | R | R   | S   | S | R | S | S |
| CRYPAK419-16 | Pakistan    | Pakistan Delhi           | R   | R | R   | S   | R | R | R | U |
| CRYPAK87-17  | Pakistan    | Pakistan Delhi           | R   | R | R   | S   | R | R | R | U |
| CRYPAK396-16 | Pakistan    | Pakistan EAI             | R   | R | R   | R   | R | R | S | R |
| CRYPAK128-17 | Pakistan    | Pakistan Delhi           | S   | R | S   | S   | S | R | S | S |
| CRYPAK152-17 | Pakistan    | Pakistan lineage4        | R   | R | R   | R   | R | R | R | R |
| CRYPAK420-16 | Pakistan    | Pakistan Delhi           | R   | R | R   | R   | R | R | R | R |
| CRYPAK282-17 | Pakistan    | Pakistan Delhi           | R   | S | S   | S   | R | S | S | S |
| CRYPAK295-17 | Pakistan    | Pakistan Delhi           | R   | R | S   | S   | R | R | U | S |
| CRYPAK512-16 | Pakistan    | Pakistan Ural            | R   | R | R   | R   | R | R | R | R |
| CRYPAK240-17 | Pakistan    | Pakistan Delhi           | R   | R | S   | S   | R | R | R | S |
| CRYPAK49-17  | Pakistan    | Pakistan Delhi           | R   | R | R   | S   | R | R | R | S |
| CRYPAK262-17 | Pakistan    | Pakistan Delhi           | S   | S | n/a | S   | S | S | S | S |
| CRYPAK398-16 | Pakistan    | Pakistan Delhi           | R   | R | S   | S   | R | R | S | S |
| CRYPAK169-17 | Pakistan    | Pakistan Delhi           | R   | R | S   | S   | R | F | S | S |
| CRYPAK78-17  | Pakistan    | Pakistan Delhi           | R   | R | R   | R   | R | R | R | R |
| CRYPAK267-17 | Pakistan    | Pakistan Delhi           | S   | S | S   | S   | S | S | S | S |
| CRYPAK137-17 | Pakistan    | Pakistan Delhi           | R   | R | S   | S   | R | R | R | S |
| CRYPAK417-16 | Pakistan    | Pakistan Beijing         | R   | R | S   | S   | R | R | U | S |
| CRYPAK418-16 | Pakistan    | Pakistan Tur             | R   | R | R   | R   | R | R | R | U |
| CRYPAK548-16 | Pakistan    | Pakistan Delhi           | R   | R | R   | S   | R | R | F | F |
| CRYPAK198-17 | Pakistan    | Pakistan Delhi           | R   | R | R   | S   | F | R | U | S |
| CRYPAK558-16 | Pakistan    | Pakistan lineage4        | R   | R | R   | R   | R | R | R | R |
| CRYPAK112-17 | Pakistan    | Pakistan Delhi           | R   | R | R   | R   | R | R | R | R |
| CRYPAK209-17 | Pakistan    | Pakistan Delhi           | R   | R | S   | S   | U | R | U | S |
| CRYPAK80-17  | Pakistan    | Pakistan Beijing         | R   | R | R   | R   | R | R | R | R |
| CRYPAK121-17 | Pakistan    | Pakistan EAI             | R   | R | R   | R   | R | R | F | R |
| CRYPAK254-17 | Pakistan    | Pakistan Delhi           | S   | S | S   | S   | S | S | S | S |
| CRYPAK221-17 | Pakistan    | Pakistan Delhi           | R   | R | R   | R   | R | R | R | U |
| 321-16       | Pakistan    | Pakistan Delhi           | R   | R | S   | S   | R | R | R | U |
| CRYPAK45-17  | Pakistan    | Pakistan Delhi           | R   | R | R   | S   | R | R | R | S |
| CRYPAK416-16 | Pakistan    | Pakistan Tur             | R   | R | R   | S   | R | R | R | S |
| CRYPAK322-17 | Pakistan    | Pakistan Delhi           | R   | R | R   | R   | R | R | R | R |
| CRYPAK480-16 | Pakistan    | Pakistan lineage4        | R   | R | R   | S   | R | R | R | S |
| CRYPAK433-16 | Pakistan    | Pakistan Beijing         | R   | R | R   | S   | R | R | R | U |
| CRYPAK299-17 | Pakistan    | Pakistan Delhi           | S   | S | S   | S   | S | S | S | S |
| CRYPAK555-16 | Pakistan    | Pakistan Delhi           | R   | R | S   | S   | R | R | R | S |
| CRYPAK117-17 | Pakistan    | Pakistan Beijing         | R   | R | R   | S   | R | R | R | S |
| CRYPAK378-16 | Pakistan    | Pakistan Delhi           | R   | R | R   | S   | R | R | R | R |
| CRYPAK44-17  | Pakistan    | Pakistan Delhi           | R   | R | S   | S   | R | R | R | S |
| CRYPAK465-16 | Pakistan    | Pakistan lineage4        | R   | R | R   | S   | R | R | R | R |
| CRYPAK278-17 | Pakistan    | Pakistan Delhi           | S   | S | S   | S   | S | S | S | S |
| CRYPAK494-16 | Pakistan    | Pakistan Delhi           | R   | R | R   | S   | R | R | R | S |
| CRYPAK244-17 | Pakistan    | Pakistan lineage4        | R   | R | R   | R   | R | R | R | R |
| CRYPAK189-17 | Pakistan    | Pakistan Delhi           | S   | S | S   | n/a | S | S | S | S |
| CRYPAK216-17 | Pakistan    | Pakistan Delhi           | R   | R | S   | R   | R | R | U | R |
| CRYPAK95-17  | Pakistan    | Pakistan Delhi           | R   | R | R   | S   | R | R | R | S |
| CRYPAK200-17 | Pakistan    | Pakistan Delhi           | R   | R | R   | n/a | R | R | R | R |

|              |          |          |          |   |   |   |     |         |   |   |   |
|--------------|----------|----------|----------|---|---|---|-----|---------|---|---|---|
| CRYPAK466-16 | Pakistan | Pakistan | Delhi    | R | R | S | R   | R       | R | R | R |
| CRYPAK73-17  | Pakistan | Pakistan | Delhi    | R | R | R | S   | R       | R | U | S |
| CRYPAK359-16 | Pakistan | Pakistan | Delhi    | R | R | R | R   | R       | R | R | R |
| CRYPAK219-17 | Pakistan | Pakistan | Delhi    | R | R | S | S   | R       | R | S | S |
| CRYPAK493-16 | Pakistan | Pakistan | Delhi    | R | R | S | S   | R       | R | S | S |
| CRYPAK471-16 | Pakistan | Pakistan | Delhi    | R | R | R | R   | R       | R | R | R |
| CRYPAK550-16 | Pakistan | Pakistan | Delhi    | R | R | R | S   | R       | R | R | R |
| CRYPAK361-16 | Pakistan | Pakistan | Delhi    | R | R | R | S   | R       | R | R | S |
| CRYPAK113-17 | Pakistan | Pakistan | lineage4 | R | R | R | S   | R       | R | F | S |
| CRYPAK71-17  | Pakistan | Pakistan | Delhi    | R | R | S | S   | R       | R | R | S |
| CRYPAK506-16 | Pakistan | Pakistan | Beijing  | R | R | R | R   | U       | R | R | F |
| 315-16       | Pakistan | Pakistan | Delhi    | R | R | R | S   | R       | R | R | S |
| CRYPAK491-16 | Pakistan | Pakistan | Delhi    | R | R | R | R   | U       | R | R | F |
| CRYPAK141-17 | Pakistan | Pakistan | Delhi    | R | R | R | R   | R       | R | R | R |
| CRYPAK328-17 | Pakistan | Pakistan | Delhi    | S | S | S | n/a | S       | S | S | S |
| CRYPAK191-17 | Pakistan | Pakistan | Delhi    | S | S | S | S   | S       | S | S | S |
| CRYPAK423-16 | Pakistan | Pakistan | Delhi    | R | R | S | S   | R       | R | R | S |
| CRYPAK237-17 | Pakistan | Pakistan | Delhi    | R | R | R | S   | R       | R | S | R |
| CRYPAK109-17 | Pakistan | Pakistan | Delhi    | R | R | R | S   | R       | R | R | S |
| CRYPAK395-16 | Pakistan | Pakistan | Delhi    | R | R | R | S   | R       | R | S | S |
| 333-16       | Pakistan | Pakistan | Delhi    | R | R | R | R   | R       | R | R | R |
| CRYPAK76-17  | Pakistan | Pakistan | Delhi    | R | R | R | S   | R       | R | R | R |
| CRYPAK500-16 | Pakistan | Pakistan | Delhi    | R | R | R | S   | R       | R | R | R |
| CRYPAK293-17 | Pakistan | Pakistan | Delhi    | S | S | S | S   | S       | S | S | S |
| CRYPAK153-17 | Pakistan | Pakistan | lineage4 | S | S | S | S   | U       | S | S | S |
| CRYPAK171-17 | Pakistan | Pakistan | Delhi    | R | R | R | S   | R       | R | R | S |
| CRYPAK104-17 | Pakistan | Pakistan | Delhi    | R | R | R | R   | R       | R | R | R |
| CRYPAK393-16 | Pakistan | Pakistan | lineage4 | R | R | R | R   | R       | R | R | R |
| CRYPAK211-17 | Pakistan | Pakistan | Delhi    | R | R | R | S   | F       | R | F | S |
| CRYPAK339-16 | Pakistan | Pakistan | Delhi    | R | R | R | R   | R       | F | F | F |
| CRYPAK270-17 | Pakistan | Pakistan | Delhi    | S | S | S | S   | S       | S | S | S |
| CRYPAK187-17 | Pakistan | Pakistan | Delhi    | R | R | S | S   | R       | R | R | S |
| CRYPAK190-17 | Pakistan | Pakistan | Delhi    | S | S | S | S   | S       | S | S | S |
| CRYPAK384-16 | Pakistan | Pakistan | Delhi    | R | R | R | R   | R       | R | R | R |
| CRYPAK315-17 | Pakistan | Pakistan | Delhi    | S | S | S | S   | S       | U | S | S |
| CRYPAK389-16 | Pakistan | Pakistan | lineage4 | R | R | S | R   | R       | R | R | R |
| CRYPAK210-17 | Pakistan | Pakistan | Delhi    | R | R | R | n/a | R       | R | R | S |
| CRYPAK400-16 | Pakistan | Pakistan | Delhi    | R | R | R | S   | R       | R | R | U |
| CRYPAK444-16 | Pakistan | Pakistan | Delhi    | R | R | R | S   | R       | R | F | S |
| CRYPAK562-16 | Pakistan | Pakistan | Delhi    | R | R | R | S   | R       | R | R | S |
| CRYPAK385-16 | Pakistan | Pakistan | Tur      | R | R | R | R   | R       | R | R | S |
| CRYPAK324-17 | Pakistan | Pakistan | Delhi    | R | R | S | S   | R       | R | S | S |
| CRYPAK106-17 | Pakistan | Pakistan | EAI      | R | R | R | R   | R       | R | R | U |
| CRYPAK263-17 | Pakistan | Pakistan | Delhi    | R | R | R | R   | R       | R | R | R |
| CRYPAK82-17  | Pakistan | Pakistan | Delhi    | R | R | S | S   | R       | R | U | S |
| CRYPAK443-16 | Pakistan | Pakistan | Delhi    | R | R | R | S   | R       | R | R | S |
| CRYPAK111-17 | Pakistan | Pakistan | Delhi    | R | R | S | S   | R       | R | R | S |
| CRYPAK343-16 | Pakistan | Pakistan | Delhi    | R | R | S | S   | S       | R | S | S |
| CRYPAK120-17 | Pakistan | Pakistan | Delhi    | R | R | R | R   | R       | R | R | R |
| CRYPAK436-16 | Pakistan | Pakistan | Delhi    | R | R | S | R   | S       | R | F | R |
| CRYPAK556-16 | Pakistan | Pakistan | Delhi    | R | R | R | R   | R       | R | R | R |
| CRYPAK255-17 | Pakistan | Pakistan | lineage4 | S | S | S | S   | S       | S | S | S |
| CRYPAK214-17 | Pakistan | Pakistan | Delhi    | R | R | R | S   | R       | R | U | S |
| CRYPAK247-17 | Pakistan | Pakistan | Delhi    | R | S | S | S   | S       | S | S | S |
| CRYPAK346-16 | Pakistan | Pakistan | lineage4 | R | R | R | R   | R       | R | R | R |
| CRYPAK264-17 | Pakistan | Pakistan | Delhi    | R | R | R | S   | U       | R | R | S |
| CRYPAK261-17 | Pakistan | Pakistan | Delhi    | R | R | R | S   | R       | R | F | S |
| CRYPAK207-17 | Pakistan | Pakistan | Delhi    | S | S | S | S   | S       | S | S | S |
| CRYPAK552-16 | Pakistan | Pakistan | EAI      | R | R | R | R   | R       | R | R | R |
| CRYPAK430-16 | Pakistan | Pakistan | EAI      | R | R | S | S   | F       | R | S | S |
| CRYPAK447-16 | Pakistan | Pakistan | Delhi    | R | R | R | S   | R       | R | R | S |
| CRYPAK450-16 | Pakistan | Pakistan | Delhi    | R | R | R | S   | R       | R | R | S |
| CRYPAK499-16 | Pakistan | Pakistan | Delhi    | R | R | R | S   | R       | R | R | U |
| CRYPAK498-16 | Pakistan | Pakistan | Delhi    | R | R | S | S   | R       | R | S | R |
| CRYPAK511-16 | Pakistan | Pakistan | Delhi    | R | R | S | S   | R       | R | R | S |
| CRYPAK52-17  | Pakistan | Pakistan | Delhi    | R | R | S | R   | R       | R | U | R |
| CRYPAK510-16 | Pakistan | Pakistan | Delhi    | R | R | R | S   | R       | R | R | S |
| CRYPAK488-16 | Pakistan | Pakistan | Tur      | R | R | R | R   | R       | R | R | F |
| CRYPAK291-17 | Pakistan | Pakistan | Delhi    | R | R | R | R   | R       | R | R | U |
| CRYPAK382-16 | Pakistan | Pakistan | Delhi    | R | R | R | S   | R       | R | R | U |
| CRYPAK288-17 | Pakistan | Pakistan | Delhi    | R | R | R | R   | R       | R | R | R |
| CRYPAK388-16 | Pakistan | Pakistan | Delhi    | R | R | S | S   | R       | R | U | S |
| CRYPAK380-16 | Pakistan | Pakistan | Delhi    | R | R | R | R   | R       | R | R | F |
| CRYPAK63-17  | Pakistan | Pakistan | Ural     | R | R | R | R   | R       | R | R | U |
| CRYPAK387-16 | Pakistan | Pakistan | Delhi    | R | R | R | R   | R       | R | R | R |
| CRYPAK358-16 | Pakistan | Pakistan | lineage4 | R | R | R | R   | R       | R | R | R |
| CRYPAK242-17 | Pakistan | Pakistan | lineage4 | S | R | S | S   | S       | R | S | S |
| CRYPAK284-17 | Pakistan | Pakistan | Delhi    | S | S | S | S   | S       | S | S | S |
| CRYPAK343-17 | Pakistan | Pakistan | Delhi    | S | S | S | n/a | S       | S | S | S |
| CRYPAK505-16 | Pakistan | Pakistan | Beijing  | R | R | R | S   | R       | R | R | R |
| CRYPAK454-16 | Pakistan | Pakistan | Delhi    | R | R | R | S   | R       | R | R | U |
| CRYPAK481-16 | Pakistan | Pakistan | lineage4 | R | R | S | S   | R       | R | R | R |
| 316-16       | Pakistan | Pakistan | lineage4 | R | R | R | R   | R       | R | R | R |
| CRYPAK50-17  | Pakistan | Pakistan | Delhi    | R | R | S | S   | R       | R | S | S |
| CRYPAK305-17 | Pakistan | Pakistan | Delhi    | S | S | S | S   | S       | S | S | S |
| CRYPAK233-17 | Pakistan | Pakistan | Delhi    | R | R | S | R   | F       | R | U | R |
| CRYPAK301-17 | Pakistan | Pakistan | EAI      | S | S | S | S   | S       | S | U | S |
| CRYPAK541-16 | Pakistan | Pakistan | Delhi    | R | R | R | S   | R       | R | R | S |
| CRYPAK483-16 | Pakistan | Pakistan | lineage4 | R | R | S | S   | R       | R | S | S |
| 325-16       | Pakistan | Pakistan | Delhi    | R | R | R | S   | R       | R | R | S |
| CRYPAK126-17 | Pakistan | Pakistan | lineage4 | R | R | R | R   | R       | R | R | R |
| CRYPAK336-17 | Pakistan | Pakistan | lineage4 | R | R | R | R   | R       | R | R | R |
| CRYPAK357-16 | Pakistan | Pakistan | Delhi    | R | R | S | S   | R       | R | S | S |
| CRYPAK201-17 | Pakistan | Pakistan | lineage4 | R | R | R | R   | R       | R | R | R |
| CRYPAK350-16 | Pakistan | Pakistan | Delhi    | R | R | R | S   | R       | R | R | R |
| CRYPAK245-17 | Pakistan | Pakistan | Delhi    | R | R | R | R   | R       | R | R | F |
| CRYPAK164-17 | Pakistan | Pakistan | lineage4 | R | R | R | R   | R       | R | U | R |
| CRYPAK230-17 | Pakistan | Pakistan | Delhi    | S | S | S | S   | S       | S | S | S |
| CRYPAK296-17 | Pakistan | Pakistan | lineage4 | R | R | R | S   | R       | R | R | S |
| 331-16       | Pakistan | Pakistan | lineage4 | R | R | R | R   | R       | R | R | R |
| 320-16       | Pakistan | Pakistan | Delhi    | R | R | R | R   | R       | R | R | R |
| 330-16       | Pakistan | Pakistan | lineage4 | R | R | S | R   | R       | R | R | R |
| CRYPAK478-16 | Pakistan | Pakistan | Delhi    | R | R | R | S   | R       | F | F | F |
| 319-16       | Pakistan | Pakistan | Delhi    | R | R | S | R   | F       | F | F | F |
| CRYPAK314-17 | Pakistan | Pakistan | Cameroon | R | R | S | S   | R       | R | R | S |
| 327-16       | Pakistan | Pakistan | Delhi    | R | R | S | S   | R       | R | R | S |
| CRYPAK127-17 | Pakistan | Pakistan | Delhi    | R | R | S | S   | R       | R | R | S |
| CRYPAK60-17  | Pakistan | Pakistan | Delhi    | R | R | S | S   | R       | R | S | S |
| CRYPAK99-17  | Pakistan | Pakistan | Beijing  | R | R | R | R   | R       | R | R | R |
| CRYPAK331-17 | Pakistan | Pakistan | lineage4 | R | R | R | S   | R       | R | R | S |
| CRYPAK330-17 | Pakistan | Pakistan | Beijing  | R | R | R | S   | Beijing | R | U | S |
| CRYPAK265-17 | Pakistan | Pakistan | Delhi    | R | R | R | S   | R       | R | R | R |
| CRYPAK206-17 | Pakistan | Pakistan | Delhi    | S | S | S | S   | S       | S | S | S |
| CRYPAK236-17 | Pakistan | Pakistan | EAI      | R | R | R | S   | R       | R | R | S |
| CRYPAK102-17 | Pakistan | Pakistan | Delhi    | R | R | S | S   | R       | R | S | S |
| CRYPAK563-16 | Pakistan | Pakistan | Delhi    | R | R | R | S   | R       | R | R | S |





|              |          |          |          |   |   |     |     |   |   |   |   |
|--------------|----------|----------|----------|---|---|-----|-----|---|---|---|---|
| CRYPAK435-16 | Pakistan | Pakistan | Delhi    | R | R | S   | S   | R | R | R | R |
| CRYPAK253-17 | Pakistan | Pakistan | Delhi    | R | R | R   | R   | R | R | R | R |
| 329-16       | Pakistan | Pakistan | Delhi    | R | R | R   | R   | R | R | R | U |
| CRYPAK473-16 | Pakistan | Pakistan | Beijing  | R | R | R   | R   | R | R | R | R |
| CRYPAK258-17 | Pakistan | Pakistan | Delhi    | R | R | n/a | S   | R | R | S | S |
| CRYPAK123-17 | Pakistan | Pakistan | Delhi    | R | R | R   | S   | R | R | R | F |
| CRYPAK540-16 | Pakistan | Pakistan | lineage4 | S | R | S   | S   | S | R | S | S |
| CR391-16     | Pakistan | Pakistan | Delhi    | R | R | R   | S   | R | R | R | R |
| CRYPAK174-17 | Pakistan | Pakistan | Delhi    | R | R | R   | S   | R | R | R | S |
| CRYPAK220-17 | Pakistan | Pakistan | Delhi    | R | R | R   | S   | R | R | R | U |
| CRYPAK354-16 | Pakistan | Pakistan | Delhi    | R | R | R   | S   | R | R | U | S |
| CRYPAK477-16 | Pakistan | Pakistan | Delhi    | R | R | R   | S   | R | R | R | S |
| CRYPAK177-17 | Pakistan | Pakistan | lineage4 | R | R | R   | S   | R | R | R | S |
| CRYPAK268-17 | Pakistan | Pakistan | Delhi    | S | S | S   | S   | S | S | S | S |
| CRYPAK215-17 | Pakistan | Pakistan | Delhi    | S | S | S   | n/a | S | S | S | S |
| CRYPAK36-17  | Pakistan | Pakistan | Delhi    | R | R | R   | S   | R | R | R | R |
| CRYPAK413-16 | Pakistan | Pakistan | Delhi    | R | R | R   | S   | R | S | R | S |
| CRYPAK487-16 | Pakistan | Pakistan | Delhi    | R | R | R   | S   | R | R | F | S |
| CRYPAK115-17 | Pakistan | Pakistan | Delhi    | R | R | R   | S   | R | R | R | F |
| CRYPAK116-17 | Pakistan | Pakistan | Delhi    | R | R | S   | R   | R | R | R | R |
| CRYPAK338-16 | Pakistan | Pakistan | EAI      | R | R | R   | R   | R | R | R | R |
| CRYPAK88-17  | Pakistan | Pakistan | Delhi    | R | R | R   | S   | U | R | R | S |
| CRYPAK179-17 | Pakistan | Pakistan | lineage4 | R | R | R   | R   | R | R | R | R |
| CRYPAK257-17 | Pakistan | Pakistan | EAI      | R | R | R   | R   | R | R | R | R |
| CRYPAK379-16 | Pakistan | Pakistan | lineage4 | R | R | R   | R   | R | R | R | R |
| CRYPAK415-16 | Pakistan | Pakistan | Delhi    | R | R | R   | S   | R | R | R | S |
| CRYPAK72-17  | Pakistan | Pakistan | Delhi    | R | R | R   | S   | R | R | R | R |
| CRYPAK180-17 | Pakistan | Pakistan | Delhi    | R | S | n/a | S   | R | S | S | S |
| CRYPAK256-17 | Pakistan | Pakistan | lineage4 | S | S | S   | S   | S | S | S | S |
| CRYPAK460-16 | Pakistan | Pakistan | Delhi    | R | R | R   | R   | R | F | F | F |
| CRYPAK428-16 | Pakistan | Pakistan | Delhi    | R | R | R   | S   | U | R | R | R |
| CRYPAK279-17 | Pakistan | Pakistan | Delhi    | R | S | S   | S   | U | S | S | S |
| CRYPAK546-16 | Pakistan | Pakistan | Delhi    | R | R | R   | R   | R | R | U | R |
| CRYPAK553-16 | Pakistan | Pakistan | Delhi    | R | R | R   | R   | R | R | R | F |
| CRYPAK252-17 | Pakistan | Pakistan | Delhi    | R | R | R   | S   | R | R | R | S |
| CRYPAK224-17 | Pakistan | Pakistan | lineage4 | R | R | R   | S   | R | R | R | R |
| CRYPAK307-17 | Pakistan | Pakistan | Delhi    | R | R | R   | S   | R | R | R | S |
| CRYPAK547-16 | Pakistan | Pakistan | Delhi    | R | R | S   | S   | U | R | F | S |
| CRYPAK475-16 | Pakistan | Pakistan | lineage4 | R | R | R   | S   | R | R | R | R |
| CRYPAK287-17 | Pakistan | Pakistan | Delhi    | S | S | S   | S   | S | S | S | S |
| CRYPAK304-17 | Pakistan | Pakistan | Cameroon | S | S | S   | S   | S | S | U | S |
| CRYPAK217-17 | Pakistan | Pakistan | Delhi    | R | R | R   | S   | R | R | R | R |
| CRYPAK74-17  | Pakistan | Pakistan | Delhi    | R | R | S   | R   | R | R | R | R |
| CRYPAK98-17  | Pakistan | Pakistan | Delhi    | R | R | R   | S   | R | R | S | S |
| CRYPAK235-17 | Pakistan | Pakistan | Beijing  | R | R | R   | R   | R | R | R | R |
| CRYPAK125-17 | Pakistan | Pakistan | Cameroon | R | R | R   | R   | S | R | S | F |
| CRYPAK276-17 | Pakistan | Pakistan | Beijing  | R | R | R   | S   | R | R | R | S |
| CRYPAK118-17 | Pakistan | Pakistan | Tur      | R | R | R   | R   | R | R | R | U |
| CRYPAK545-16 | Pakistan | Pakistan | Delhi    | R | R | S   | S   | S | R | R | S |
| CRYPAK62-17  | Pakistan | Pakistan | Delhi    | R | R | S   | R   | R | R | R | F |
| CRYPAK424-16 | Pakistan | Pakistan | Delhi    | R | R | R   | S   | R | R | R | R |
| CRYPAK496-16 | Pakistan | Pakistan | Delhi    | R | R | R   | R   | U | R | R | R |
| CRYPAK213-17 | Pakistan | Pakistan | Delhi    | R | R | R   | R   | R | R | U | R |
| 334-16       | Pakistan | Pakistan | lineage4 | R | R | R   | R   | R | R | R | R |
| CRYPAK300-17 | Pakistan | Pakistan | Delhi    | R | R | S   | S   | R | R | S | S |
| CRYPAK136-17 | Pakistan | Pakistan | Delhi    | R | R | R   | S   | R | R | R | S |
| CRYPAK294-17 | Pakistan | Pakistan | lineage4 | R | R | S   | S   | R | R | R | S |
| CRYPAK508-16 | Pakistan | Pakistan | Delhi    | R | R | R   | R   | R | R | R | R |
| CRYPAK381-16 | Pakistan | Pakistan | Beijing  | R | R | R   | S   | R | R | R | S |
| CRYPAK122-17 | Pakistan | Pakistan | Delhi    | R | R | R   | S   | R | R | R | S |
| CRYPAK274-17 | Pakistan | Pakistan | Delhi    | R | R | S   | S   | R | R | R | S |
| CRYPAK292-17 | Pakistan | Pakistan | Delhi    | R | R | S   | S   | R | R | S | S |
| CRYPAK446-16 | Pakistan | Pakistan | Delhi    | R | R | R   | S   | R | R | R | S |
| CRYPAK289-17 | Pakistan | Pakistan | Delhi    | S | S | S   | S   | S | S | S | S |
| CRYPAK316-17 | Pakistan | Pakistan | Delhi    | S | S | S   | S   | S | S | S | S |
| CRYPAK188-17 | Pakistan | Pakistan | Delhi    | S | S | S   | S   | S | S | S | S |
| CRYPAK167-17 | Pakistan | Pakistan | Delhi    | R | R | R   | S   | R | R | R | S |
| CRYPAK306-17 | Pakistan | Pakistan | Delhi    | R | R | S   | S   | S | R | S | S |
| CRYPAK97-17  | Pakistan | Pakistan | Delhi    | R | R | S   | S   | R | R | R | S |
| CRYPAK432-16 | Pakistan | Pakistan | Delhi    | R | R | S   | R   | R | R | U | R |
| 337-16       | Pakistan | Pakistan | Delhi    | R | R | S   | S   | R | R | S | S |
| CRYPAK386-16 | Pakistan | Pakistan | Delhi    | R | R | S   | S   | R | R | R | S |
| CRYPAK467-16 | Pakistan | Pakistan | Haarlem  | R | R | n/a | S   | R | R | R | S |
| CRYPAK453-16 | Pakistan | Pakistan | Delhi    | R | R | S   | S   | R | R | S | S |
| CRYPAK103-17 | Pakistan | Pakistan | Delhi    | R | R | R   | S   | R | R | R | S |
| CRYPAK341-16 | Pakistan | Pakistan | Delhi    | R | R | S   | R   | R | R | S | R |
| CRYPAK441-16 | Pakistan | Pakistan | Delhi    | R | R | R   | S   | R | R | U | S |
| CRYPAK53-17  | Pakistan | Pakistan | Delhi    | R | R | n/a | R   | R | R | R | U |
| CRYPAK251-17 | Pakistan | Pakistan | Delhi    | S | S | S   | S   | S | S | S | S |
| CRYPAK335-17 | Pakistan | Pakistan | Delhi    | S | S | S   | S   | R | S | S | S |
| CRYPAK248-17 | Pakistan | Pakistan | Delhi    | R | R | R   | S   | R | R | R | S |
| CRYPAK507-16 | Pakistan | Pakistan | Delhi    | R | R | R   | S   | R | R | F | S |
| CRYPAK140-17 | Pakistan | Pakistan | Delhi    | R | R | R   | S   | R | R | R | S |
| CRYPAK275-17 | Pakistan | Pakistan | Delhi    | S | S | S   | S   | S | S | S | S |
| CRYPAK259-17 | Pakistan | Pakistan | lineage4 | R | R | R   | S   | R | R | S | S |
| CRYPAK340-16 | Pakistan | Pakistan | Delhi    | R | R | S   | S   | R | R | U | S |
| 328-16       | Pakistan | Pakistan | Delhi    | R | R | R   | S   | R | R | R | R |
| CRYPAK176-17 | Pakistan | Pakistan | lineage4 | R | R | R   | R   | R | R | R | R |
| CRYPAK269-17 | Pakistan | Pakistan | Delhi    | R | R | S   | S   | R | R | U | S |
| CRYPAK427-16 | Pakistan | Pakistan | Delhi    | R | R | S   | R   | R | R | R | R |
| CRYPAK260-17 | Pakistan | Pakistan | Delhi    | R | R | R   | S   | R | R | R | U |
| CRYPAK333-17 | Pakistan | Pakistan | Delhi    | R | R | R   | S   | R | R | R | S |
| CRYPAK223-17 | Pakistan | Pakistan | Delhi    | R | R | S   | S   | R | F | U | S |
| CRYPAK114-17 | Pakistan | Pakistan | Delhi    | R | R | R   | R   | R | R | R | R |
| CRYPAK100-17 | Pakistan | Pakistan | Delhi    | R | R | R   | R   | R | R | R | R |
| 314-16       | Pakistan | Pakistan | Delhi    | R | R | R   | R   | U | R | F | R |
| CRYPAK90-17  | Pakistan | Pakistan | Cameroon | R | R | S   | S   | R | R | R | S |
| 324-16       | Pakistan | Pakistan | Delhi    | R | R | R   | S   | R | S | R | S |
| CRYPAK495-16 | Pakistan | Pakistan | Delhi    | R | R | R   | S   | R | R | R | S |
| CRYPAK459-16 | Pakistan | Pakistan | Delhi    | R | R | S   | R   | R | R | R | S |
| 326-16       | Pakistan | Pakistan | Beijing  | R | R | R   | R   | R | R | R | R |
| CRYPAK205-17 | Pakistan | Pakistan | Delhi    | R | S | S   | S   | R | S | S | S |
| CRYPAK283-17 | Pakistan | Pakistan | Delhi    | S | S | S   | S   | S | S | S | S |
| CRYPAK312-17 | Pakistan | Pakistan | Delhi    | R | R | R   | R   | R | R | R | R |
| CRYPAK68-17  | Pakistan | Pakistan | Delhi    | R | R | R   | S   | R | R | R | F |
| CRYPAK84-17  | Pakistan | Pakistan | Delhi    | R | R | S   | S   | U | R | R | S |
| CRYPAK401-16 | Pakistan | Pakistan | Haarlem  | R | R | R   | R   | R | R | R | R |
| CRYPAK344-16 | Pakistan | Pakistan | Beijing  | R | R | R   | S   | R | R | R | S |
| CRYPAK119-17 | Pakistan | Pakistan | Delhi    | R | R | R   | R   | R | R | R | U |
| CRYPAK285-17 | Pakistan | Pakistan | Delhi    | R | R | R   | R   | R | R | U | F |
| CRYPAK476-16 | Pakistan | Pakistan | Beijing  | R | R | R   | R   | R | R | R | R |
| CRYPAK449-16 | Pakistan | Pakistan | Delhi    | R | R | n/a | R   | R | R | F | F |
| CRYPAK101-17 | Pakistan | Pakistan | Delhi    | R | R | R   | S   | R | R | R | U |
| CRYPAK271-17 | Pakistan | Pakistan | Delhi    | R | R | S   | S   | R | R | S | S |
| CRYPAK92-17  | Pakistan | Pakistan | Delhi    | R | R | R   | R   | R | R | R | R |
| CRYPAK238-17 | Pakistan | Pakistan | Delhi    | R | R | S   | n/a | R | R | F | S |

|             |          |          |          |   |     |   |     |   |   |   |   |
|-------------|----------|----------|----------|---|-----|---|-----|---|---|---|---|
| CRYPK163-17 | Pakistan | Pakistan | Delhi    | R | R   | R | S   | R | R | R | S |
| CRYPK341-17 | Pakistan | Pakistan | Haarlem  | R | R   | R | n/a | R | R | R | S |
| 03-R1504    | Harvard  | Peru     | Beijing  | R | R   | R | R   | R | R | R | R |
| 01-R1387    | Harvard  | Peru     | LAM      | R | R   | R | R   | R | R | R | R |
| 01-R0185    | Harvard  | Peru     | Haarlem  | R | R   | R | R   | R | R | U | U |
| 02-R1457    | Harvard  | Peru     | LAM      | R | R   | R | R   | R | R | U | R |
| 02-R1681    | Harvard  | Peru     | LAM      | R | R   | R | R   | R | R | R | R |
| 01-R1466    | Harvard  | Peru     | LAM      | R | R   | R | S   | R | R | R | S |
| 01-R0451    | Harvard  | Peru     | lineage4 | R | R   | R | R   | R | R | R | R |
| 01-R0774    | Harvard  | Peru     | Beijing  | R | R   | R | R   | R | R | R | F |
| 02-R1101    | Harvard  | Peru     | Haarlem  | S | S   | S | S   | S | F | S | F |
| 01-R0909    | Harvard  | Peru     | lineage4 | R | R   | R | R   | R | R | R | R |
| 01-R0420    | Harvard  | Peru     | LAM      | R | R   | R | R   | R | R | F | S |
| 01-R1321    | Harvard  | Peru     | Beijing  | R | R   | R | R   | R | R | R | F |
| 01-R1505    | Harvard  | Peru     | Beijing  | R | R   | R | R   | R | R | R | R |
| 02-R1275    | Harvard  | Peru     | lineage4 | S | S   | S | S   | S | S | S | S |
| 02-R0325    | Harvard  | Peru     | LAM      | R | R   | R | S   | R | R | R | R |
| 01-R1339    | Harvard  | Peru     | lineage4 | R | R   | S | R   | R | R | R | R |
| 03-R0797    | Harvard  | Peru     | Haarlem  | R | R   | R | R   | R | R | R | R |
| 02-R1076    | Harvard  | Peru     | Haarlem  | S | S   | S | S   | S | S | S | S |
| 01-R0878    | Harvard  | Peru     | lineage4 | R | R   | R | R   | R | R | R | R |
| 02-R1140    | Harvard  | Peru     | lineage4 | S | S   | S | S   | S | S | S | S |
| 02-R1645    | Harvard  | Peru     | Haarlem  | R | R   | S | S   | S | R | S | S |
| 03-R0951    | Harvard  | Peru     | Haarlem  | R | R   | R | R   | U | R | R | R |
| 02-R1683    | Harvard  | Peru     | LAM      | R | R   | R | S   | R | R | R | S |
| 00-R1562    | Harvard  | Peru     | Beijing  | R | R   | R | S   | R | R | S | U |
| 03-10017    | Harvard  | Peru     | Beijing  | S | S   | S | S   | S | S | S | S |
| 03-R0795    | Harvard  | Peru     | LAM      | S | S   | S | S   | S | S | S | S |
| 02-R1726    | Harvard  | Peru     | Haarlem  | R | R   | R | S   | R | R | U | U |
| 02-R1915    | Harvard  | Peru     | LAM      | R | S   | S | S   | S | S | S | S |
| 03-R0061    | Harvard  | Peru     | LAM      | R | R   | R | R   | R | R | R | R |
| 02-09688    | Harvard  | Peru     | EAI      | S | S   | S | n/a | S | S | U | S |
| 03-R1082    | Harvard  | Peru     | LAM      | R | R   | R | R   | R | R | F | R |
| 00-R1547    | Harvard  | Peru     | lineage4 | R | R   | R | R   | R | R | R | R |
| 99-R862     | Harvard  | Peru     | LAM      | R | R   | R | S   | R | R | R | R |
| 02-R1485    | Harvard  | Peru     | LAM      | R | R   | R | R   | R | R | R | R |
| 00-R0308    | Harvard  | Peru     | LAM      | R | R   | R | R   | R | R | R | R |
| 01-R0265    | Harvard  | Peru     | Haarlem  | R | R   | S | R   | R | R | U | R |
| 03-R0986    | Harvard  | Peru     | LAM      | R | R   | S | R   | R | R | S | R |
| 01-R1386    | Harvard  | Peru     | Haarlem  | R | R   | S | S   | S | R | S | S |
| 02-R1262    | Harvard  | Peru     | LAM      | S | S   | S | n/a | S | S | S | S |
| 01-R0272    | Harvard  | Peru     | lineage4 | R | S   | R | R   | R | R | R | R |
| 03-R0293    | Harvard  | Peru     | Beijing  | R | R   | R | S   | R | R | R | S |
| 98-R660     | Harvard  | Peru     | LAM      | R | R   | R | R   | R | R | R | R |
| 03-R0655    | Harvard  | Peru     | Haarlem  | R | R   | R | S   | R | R | U | S |
| 03-R0419    | Harvard  | Peru     | LAM      | R | R   | R | R   | R | R | R | S |
| 03-R0929    | Harvard  | Peru     | LAM      | S | S   | S | S   | S | S | S | S |
| 98-R790     | Harvard  | Peru     | Beijing  | R | R   | R | R   | R | R | S | R |
| 99-R1043    | Harvard  | Peru     | lineage4 | R | n/a | R | n/a | R | S | R | S |
| 02-R0951    | Harvard  | Peru     | lineage4 | R | R   | R | R   | R | F | F | F |
| 02-R0236    | Harvard  | Peru     | Haarlem  | R | R   | S | R   | R | R | R | U |
| 03-R0749    | Harvard  | Peru     | Haarlem  | S | S   | S | S   | S | S | S | S |
| 01-R0238    | Harvard  | Peru     | LAM      | R | R   | S | S   | R | R | S | S |
| 01-R1468    | Harvard  | Peru     | LAM      | R | R   | R | R   | R | R | R | R |
| 03-R0194    | Harvard  | Peru     | LAM      | R | R   | R | R   | R | R | R | R |
| 03-R0070    | Harvard  | Peru     | LAM      | R | R   | R | R   | R | R | R | R |
| 03-R0177    | Harvard  | Peru     | LAM      | R | R   | R | R   | R | R | R | R |
| 02-R1945    | Harvard  | Peru     | LAM      | R | R   | R | R   | R | R | R | R |
| 02-R0984    | Harvard  | Peru     | LAM      | R | R   | S | R   | R | R | R | R |
| 99-R545     | Harvard  | Peru     | lineage4 | R | R   | R | R   | R | R | R | R |
| 01-R0880    | Harvard  | Peru     | LAM      | R | R   | R | R   | R | F | R | S |
| 03-R0327    | Harvard  | Peru     | Beijing  | R | R   | R | R   | R | R | R | R |
| 02-R0237    | Harvard  | Peru     | lineage4 | R | R   | R | n/a | R | R | R | F |
| 01-R1305    | Harvard  | Peru     | lineage4 | R | R   | R | R   | R | R | R | R |
| 04-R0438    | Harvard  | Peru     | LAM      | R | R   | R | R   | R | R | U | R |
| 02-R1191    | Harvard  | Peru     | Haarlem  | S | S   | S | S   | S | S | S | S |
| 03-R0319    | Harvard  | Peru     | LAM      | R | R   | R | R   | R | R | R | R |
| 01-R0899    | Harvard  | Peru     | lineage4 | R | R   | R | R   | R | R | R | R |
| 02-R1288    | Harvard  | Peru     | Beijing  | R | R   | R | R   | R | R | R | F |
| 02-09397    | Harvard  | Peru     | Haarlem  | S | S   | S | n/a | S | S | S | S |
| 03-R1176    | Harvard  | Peru     | Beijing  | R | R   | R | R   | R | R | R | R |
| 02-R0759    | Harvard  | Peru     | Haarlem  | R | R   | R | R   | R | R | R | R |
| 03-R0768    | Harvard  | Peru     | X-type   | S | S   | S | S   | U | S | S | S |
| 02-R1589    | Harvard  | Peru     | lineage4 | R | R   | S | R   | R | R | S | R |
| 02-R1203    | Harvard  | Peru     | lineage4 | S | S   | S | S   | S | S | S | S |
| 03-R0780    | Harvard  | Peru     | LAM      | S | S   | S | S   | S | S | S | S |
| 02-R1630    | Harvard  | Peru     | lineage4 | R | R   | R | R   | R | R | R | R |
| 01-R0153    | Harvard  | Peru     | X-type   | R | R   | R | R   | R | R | R | R |
| 03-R1451    | Harvard  | Peru     | Haarlem  | R | R   | R | S   | R | R | R | U |
| 99-10364    | Harvard  | Peru     | LAM      | R | R   | R | R   | R | R | R | R |
| 02-R0911    | Harvard  | Peru     | LAM      | R | R   | R | R   | R | R | U | R |
| 03-R0411    | Harvard  | Peru     | LAM      | R | S   | R | S   | U | S | U | S |
| 02-09856    | Harvard  | Peru     | lineage4 | S | S   | S | n/a | S | S | S | S |
| 03-R1465    | Harvard  | Peru     | Haarlem  | R | R   | R | R   | R | R | R | R |
| 02-R1940    | Harvard  | Peru     | lineage4 | R | R   | R | R   | R | R | R | R |
| 03-R0878    | Harvard  | Peru     | Beijing  | R | R   | R | R   | R | R | R | F |
| 01-R0685    | Harvard  | Peru     | lineage4 | R | R   | R | R   | R | R | R | R |
| 02-R1544    | Harvard  | Peru     | LAM      | R | S   | S | R   | R | R | S | R |
| 02-R0754    | Harvard  | Peru     | LAM      | R | R   | S | R   | R | R | S | R |
| 02-R0948    | Harvard  | Peru     | lineage4 | R | R   | R | R   | R | R | R | R |
| 99-R576     | Harvard  | Peru     | X-type   | R | R   | R | R   | R | R | R | R |
| 03-R0871    | Harvard  | Peru     | LAM      | R | R   | R | R   | R | R | R | R |
| 03-R0268    | Harvard  | Peru     | Beijing  | R | R   | R | R   | R | R | R | R |
| 01-R0908    | Harvard  | Peru     | lineage4 | R | R   | R | R   | R | R | R | U |
| 02-R0099    | Harvard  | Peru     | lineage4 | R | R   | R | S   | R | R | R | S |
| 02-R0119    | Harvard  | Peru     | LAM      | R | R   | S | S   | R | R | R | R |
| 01-R1599    | Harvard  | Peru     | LAM      | R | R   | S | R   | R | R | R | R |
| 01-R1309    | Harvard  | Peru     | lineage4 | R | R   | R | R   | R | R | R | F |
| 02-R1685    | Harvard  | Peru     | LAM      | R | R   | R | R   | R | R | R | R |
| 98-R454     | Harvard  | Peru     | Haarlem  | R | R   | R | n/a | R | R | R | R |
| 01-R0166    | Harvard  | Peru     | LAM      | R | R   | R | R   | R | R | R | R |
| 02-R0848    | Harvard  | Peru     | S-type   | R | R   | S | R   | R | R | U | R |
| 03-R0783    | Harvard  | Peru     | lineage4 | S | S   | S | S   | S | S | S | S |
| 03-R0920    | Harvard  | Peru     | Haarlem  | R | S   | S | S   | R | S | S | S |
| 02-R1687    | Harvard  | Peru     | LAM      | R | R   | R | R   | R | R | R | R |
| 01-R1018    | Harvard  | Peru     | LAM      | R | R   | R | R   | R | R | R | F |
| 00-R1566    | Harvard  | Peru     | X-type   | R | R   | R | R   | R | R | R | R |
| 00-R1399    | Harvard  | Peru     | lineage4 | R | R   | R | n/a | R | R | R | R |
| 04-R0292    | Harvard  | Peru     | Beijing  | R | R   | R | R   | R | R | R | R |
| 02-R1114    | Harvard  | Peru     | LAM      | S | S   | S | S   | U | S | S | S |
| 02-10075    | Harvard  | Peru     | Haarlem  | S | S   | S | n/a | S | S | S | S |
| 02-R1244    | Harvard  | Peru     | X-type   | S | S   | S | S   | S | S | S | S |
| 03-R0068    | Harvard  | Peru     | LAM      | R | R   | S | S   | R | R | U | S |
| 99-R719     | Harvard  | Peru     | LAM      | R | R   | R | S   | R | R | S | S |
| 01-R1499    | Harvard  | Peru     | lineage4 | R | R   | R | n/a | R | R | R | R |
| 00-R0223    | Harvard  | Peru     | lineage4 | S | S   | S | n/a | S | S | S | S |

|            |                    |      |          |   |   |     |     |   |   |   |   |
|------------|--------------------|------|----------|---|---|-----|-----|---|---|---|---|
| 02-R0272   | Harvard            | Peru | LAM      | R | R | R   | S   | R | R | R | R |
| 03-R0110   | Harvard            | Peru | Haarlem  | R | R | R   | R   | R | R | U | U |
| 02-R0971   | Harvard            | Peru | lineage4 | R | R | R   | S   | U | R | R | R |
| 00-R1405   | Harvard            | Peru | lineage4 | R | R | R   | R   | R | R | R | U |
| 02-09928   | Harvard            | Peru | LAM      | S | S | S   | n/a | S | S | U | S |
| 02-R0286   | Harvard            | Peru | LAM      | R | R | S   | S   | R | R | R | S |
| 02-R0890   | Harvard            | Peru | X-type   | R | S | S   | S   | R | R | R | R |
| 01-R0239   | Harvard            | Peru | LAM      | R | R | R   | S   | R | R | R | R |
| 01-R0904   | Harvard            | Peru | LAM      | R | R | R   | R   | R | R | R | R |
| 02-R1142   | Harvard            | Peru | LAM      | S | S | S   | S   | S | S | S | S |
| 02-R0407   | Harvard            | Peru | Haarlem  | S | S | S   | S   | S | S | S | S |
| 99-R1083   | Harvard            | Peru | LAM      | R | R | R   | S   | R | R | R | R |
| 03-R0979   | Harvard            | Peru | LAM      | R | R | R   | S   | R | R | R | U |
| 02-R0360   | Harvard            | Peru | Haarlem  | R | R | R   | S   | R | R | R | S |
| 01-R0244   | Harvard            | Peru | Haarlem  | R | R | S   | R   | R | R | R | U |
| 03-R0821   | Harvard            | Peru | LAM      | R | R | R   | R   | R | R | R | R |
| 03-R0908   | Harvard            | Peru | LAM      | S | S | S   | S   | S | S | S | S |
| 02-R1871   | Harvard            | Peru | Haarlem  | R | R | R   | S   | R | R | R | S |
| 02-R1793   | Harvard            | Peru | Beijing  | R | R | R   | R   | R | R | R | U |
| 02-R1479   | Harvard            | Peru | X-type   | R | R | R   | R   | R | R | R | R |
| 03-R0221   | Harvard            | Peru | LAM      | R | R | R   | R   | R | R | R | R |
| 02-R1709   | Harvard            | Peru | LAM      | R | R | R   | R   | R | R | R | U |
| 01-R0897   | Harvard            | Peru | lineage4 | R | R | R   | S   | R | R | R | S |
| 00-R0435   | Harvard            | Peru | lineage4 | R | R | R   | R   | R | R | R | U |
| 02-10028   | Harvard            | Peru | EAI      | S | S | S   | n/a | S | S | S | F |
| 03-R0324   | Harvard            | Peru | LAM      | R | R | R   | R   | R | R | R | R |
| 02-R1106   | Harvard            | Peru | LAM      | S | S | S   | S   | S | S | S | S |
| 03-R0736   | Harvard            | Peru | Haarlem  | S | S | S   | S   | S | S | S | S |
| 03-R0058   | Harvard            | Peru | Beijing  | R | S | R   | R   | R | R | R | R |
| 01-R0697   | Harvard            | Peru | lineage4 | R | R | R   | R   | R | R | R | R |
| 01-R0903   | Harvard            | Peru | LAM      | R | R | R   | R   | R | R | R | R |
| 01-R0737   | Harvard            | Peru | LAM      | R | R | R   | R   | R | R | S | R |
| 02-R1789   | Harvard            | Peru | Beijing  | R | R | R   | R   | R | R | R | F |
| 00-R0312   | Harvard            | Peru | LAM      | R | R | R   | n/a | R | R | R | R |
| 02-R0417   | Harvard            | Peru | lineage4 | R | R | R   | R   | R | R | R | R |
| 00-R0025   | Harvard            | Peru | Beijing  | R | R | R   | n/a | R | R | R | U |
| 02-R1723   | Harvard            | Peru | Haarlem  | R | R | R   | R   | R | R | R | R |
| 02-R0241   | Harvard            | Peru | LAM      | R | R | R   | S   | R | R | R | U |
| 99-R890    | Harvard            | Peru | X-type   | R | R | R   | n/a | R | R | R | R |
| 00-R1156   | Harvard            | Peru | X-type   | R | R | R   | R   | R | R | R | R |
| 02-R1742   | Harvard            | Peru | Beijing  | R | R | R   | R   | R | R | R | S |
| 02-R1952   | Harvard            | Peru | Beijing  | R | R | R   | R   | R | R | R | F |
| 03-R1338   | Harvard            | Peru | lineage4 | R | R | R   | R   | R | R | R | R |
| 03-R1337   | Harvard            | Peru | LAM      | R | R | R   | R   | R | R | R | R |
| 01-R1559   | Harvard            | Peru | Beijing  | R | R | R   | S   | R | R | R | S |
| 02-R0191   | Harvard            | Peru | Haarlem  | R | R | R   | R   | R | R | R | U |
| 00-R0086   | Harvard            | Peru | Beijing  | R | R | R   | R   | R | R | R | R |
| 02-10098   | Harvard            | Peru | X-type   | S | S | S   | n/a | S | S | S | S |
| 02-R1942   | Harvard            | Peru | lineage4 | R | R | R   | R   | R | R | R | R |
| 02-R1854   | Harvard            | Peru | LAM      | S | S | S   | S   | S | S | U | S |
| 02-R1728   | Harvard            | Peru | LAM      | R | R | R   | R   | R | R | R | R |
| 02-R1137   | Harvard            | Peru | LAM      | S | S | S   | S   | S | S | S | S |
| 02-R1641   | Harvard            | Peru | Beijing  | R | R | R   | S   | R | R | R | S |
| 04-R0273   | Harvard            | Peru | lineage4 | R | R | R   | R   | R | R | R | F |
| 01-R0276   | Harvard            | Peru | LAM      | R | R | S   | R   | R | R | R | F |
| 02-R1260   | Harvard            | Peru | Delhi    | S | S | S   | n/a | S | S | S | S |
| 00-R0453   | Harvard            | Peru | LAM      | R | R | R   | n/a | R | R | R | R |
| 02-R1210   | Harvard            | Peru | Haarlem  | S | S | S   | S   | S | S | S | S |
| 02-R0793   | Harvard            | Peru | lineage4 | R | R | R   | R   | R | R | R | R |
| 99-R887    | Harvard            | Peru | LAM      | R | R | R   | R   | R | R | R | R |
| 01-R0647   | Harvard            | Peru | Beijing  | R | R | S   | R   | R | R | R | R |
| 01-R1241   | Harvard            | Peru | Haarlem  | R | R | R   | S   | R | R | U | U |
| 02-R0861   | Harvard            | Peru | LAM      | R | R | R   | R   | R | R | R | R |
| 02-R1267   | Harvard            | Peru | EAI      | S | S | S   | n/a | S | S | S | S |
| 02-R1753   | Harvard            | Peru | Beijing  | R | S | R   | S   | R | R | U | S |
| 02-R0812   | Harvard            | Peru | LAM      | R | R | R   | R   | R | R | R | R |
| 00-R0178   | Harvard            | Peru | LAM      | R | R | R   | R   | R | R | R | R |
| 00-R1549   | Harvard            | Peru | lineage4 | R | R | R   | S   | R | R | R | U |
| 03-10150   | Harvard            | Peru | LAM      | S | S | S   | n/a | S | S | S | S |
| 02-R1543   | Harvard            | Peru | S-type   | R | R | R   | S   | R | R | R | S |
| 01-R1341   | Harvard            | Peru | X-type   | R | R | R   | R   | R | R | R | R |
| 02-R0016   | Harvard            | Peru | LAM      | R | R | R   | R   | R | R | R | F |
| 99-R141    | Harvard            | Peru | lineage4 | R | R | R   | n/a | R | R | R | R |
| 02-R1825   | Harvard            | Peru | Beijing  | R | R | R   | R   | R | R | R | R |
| 01-R1540   | Harvard            | Peru | Beijing  | R | R | S   | R   | R | R | S | R |
| 02-R0328   | Harvard            | Peru | Beijing  | R | R | R   | R   | R | R | R | S |
| 03-R1404   | Harvard            | Peru | Beijing  | R | R | R   | R   | R | R | U | R |
| 02-R1527   | Harvard            | Peru | lineage4 | R | R | R   | R   | R | R | R | R |
| 99-R855    | Harvard            | Peru | Beijing  | R | R | R   | R   | R | R | R | F |
| 03-R1373   | Harvard            | Peru | X-type   | R | R | R   | R   | R | R | R | R |
| 02-R1444   | Harvard            | Peru | LAM      | R | R | S   | R   | R | R | R | R |
| 01-R0902   | Harvard            | Peru | LAM      | R | R | R   | R   | R | R | R | R |
| 03-R1084   | Harvard            | Peru | Beijing  | R | S | R   | R   | R | R | R | R |
| 01-R0290   | Harvard            | Peru | LAM      | R | R | R   | R   | R | R | R | U |
| 03-10019   | Harvard            | Peru | Beijing  | S | S | S   | S   | S | S | S | S |
| 02-R1941   | Harvard            | Peru | Haarlem  | R | R | R   | R   | R | R | R | R |
| 14893_2_49 | Peru via LSHTM, UK | Peru | Haarlem  | S | R | n/a | n/a | S | R | S | S |
| 14722_6_94 | Peru via LSHTM, UK | Peru | Haarlem  | R | R | n/a | n/a | R | R | R | R |
| 14892_2_31 | Peru via LSHTM, UK | Peru | LAM      | R | S | n/a | n/a | R | S | S | S |
| 14893_2_1  | Peru via LSHTM, UK | Peru | LAM      | R | S | n/a | n/a | R | S | S | S |
| 14892_2_34 | Peru via LSHTM, UK | Peru | LAM      | R | R | n/a | n/a | R | R | S | S |
| 14892_2_41 | Peru via LSHTM, UK | Peru | Haarlem  | R | R | n/a | n/a | R | R | U | R |
| 14892_2_57 | Peru via LSHTM, UK | Peru | Haarlem  | R | S | n/a | n/a | R | S | S | S |
| 14893_2_43 | Peru via LSHTM, UK | Peru | Haarlem  | R | R | n/a | n/a | R | R | R | R |
| 14893_2_34 | Peru via LSHTM, UK | Peru | LAM      | R | R | n/a | n/a | R | R | R | S |
| 15277_3_50 | Peru via LSHTM, UK | Peru | lineage4 | S | R | n/a | n/a | S | R | R | S |
| 14722_6_33 | Peru via LSHTM, UK | Peru | LAM      | R | R | n/a | n/a | R | R | R | S |
| 14892_2_33 | Peru via LSHTM, UK | Peru | LAM      | R | S | n/a | n/a | R | S | S | S |
| 14893_2_61 | Peru via LSHTM, UK | Peru | LAM      | R | R | n/a | n/a | R | R | S | S |
| 14893_2_45 | Peru via LSHTM, UK | Peru | LAM      | S | R | n/a | n/a | R | R | S | R |
| 14892_2_10 | Peru via LSHTM, UK | Peru | Haarlem  | R | S | n/a | n/a | R | S | S | S |
| 14722_6_26 | Peru via LSHTM, UK | Peru | LAM      | S | S | n/a | n/a | S | S | U | S |
| 14893_2_20 | Peru via LSHTM, UK | Peru | X-type   | R | S | n/a | n/a | R | S | S | S |
| 14893_2_47 | Peru via LSHTM, UK | Peru | Haarlem  | S | R | n/a | n/a | S | R | S | S |
| 14892_2_5  | Peru via LSHTM, UK | Peru | Beijing  | R | R | n/a | n/a | R | R | S | S |
| 14892_2_22 | Peru via LSHTM, UK | Peru | X-type   | R | S | n/a | n/a | R | S | S | S |
| 14893_2_9  | Peru via LSHTM, UK | Peru | lineage4 | R | R | n/a | n/a | R | R | S | S |
| 14892_2_30 | Peru via LSHTM, UK | Peru | Haarlem  | R | S | n/a | n/a | R | S | S | S |
| 14893_2_18 | Peru via LSHTM, UK | Peru | LAM      | S | R | n/a | n/a | F | F | S | F |
| 14893_2_5  | Peru via LSHTM, UK | Peru | EAI      | S | S | n/a | n/a | S | S | S | S |
| 14893_2_65 | Peru via LSHTM, UK | Peru | LAM      | R | S | n/a | n/a | R | S | S | S |
| 14893_2_36 | Peru via LSHTM, UK | Peru | LAM      | R | R | n/a | n/a | R | R | R | R |
| 14892_2_9  | Peru via LSHTM, UK | Peru | LAM      | R | R | n/a | n/a | R | R | S | S |
| 14892_2_18 | Peru via LSHTM, UK | Peru | Haarlem  | R | S | n/a | n/a | R | S | S | S |
| 14892_2_36 | Peru via LSHTM, UK | Peru | Haarlem  | R | S | n/a | n/a | R | U | S | S |
| 14722_6_69 | Peru via LSHTM, UK | Peru | LAM      | S | S | n/a | n/a | S | S | S | S |

|            |                                                 |        |           |           |   |     |     |     |   |   |   |
|------------|-------------------------------------------------|--------|-----------|-----------|---|-----|-----|-----|---|---|---|
| 14892_2_44 | Peru via LSHTM, UK                              | Peru   | X-type    | S         | S | n/a | n/a | S   | S | S | S |
| 14893_2_55 | Peru via LSHTM, UK                              | Peru   | Beijing   | R         | R | n/a | n/a | R   | R | S | S |
| 14893_2_63 | Peru via LSHTM, UK                              | Peru   | Haarlem   | R         | R | n/a | n/a | R   | R | U | S |
| 14893_2_42 | Peru via LSHTM, UK                              | Peru   | Haarlem   | R         | S | n/a | n/a | R   | S | S | S |
| 14722_7_80 | Peru via LSHTM, UK                              | Peru   | LAM       | R         | S | n/a | n/a | R   | S | S | S |
| 14722_7_29 | Peru via LSHTM, UK                              | Peru   | Haarlem   | R         | S | n/a | n/a | R   | S | R | S |
| 14893_2_14 | Peru via LSHTM, UK                              | Peru   | Haarlem   | R         | R | n/a | n/a | S   | S | S | S |
| 14893_2_8  | Peru via LSHTM, UK                              | Peru   | LAM       | R         | R | n/a | n/a | R   | R | S | R |
| 14722_6_84 | Peru via LSHTM, UK                              | Peru   | lineage4  | R         | S | n/a | n/a | R   | S | S | S |
| 14893_2_10 | Peru via LSHTM, UK                              | Peru   | LAM       | R         | R | n/a | n/a | R   | R | U | R |
| 14893_2_21 | Peru via LSHTM, UK                              | Peru   | lineage4  | R         | R | n/a | n/a | R   | R | R | S |
| 14722_6_13 | Peru via LSHTM, UK                              | Peru   | LAM       | S         | R | n/a | n/a | R   | R | R | R |
| 14893_2_50 | Peru via LSHTM, UK                              | Peru   | LAM       | R         | R | n/a | n/a | R   | R | R | R |
| 15277_3_52 | Peru via LSHTM, UK                              | Peru   | lineage4  | R         | R | n/a | n/a | R   | R | R | R |
| 14893_2_23 | Peru via LSHTM, UK                              | Peru   | LAM       | S         | R | n/a | n/a | R   | R | S | R |
| 14722_6_21 | Peru via LSHTM, UK                              | Peru   | Haarlem   | R         | S | n/a | n/a | S   | U | S | S |
| 14892_2_1  | Peru via LSHTM, UK                              | Peru   | LAM       | R         | R | n/a | n/a | R   | R | R | R |
| 14722_7_77 | Peru via LSHTM, UK                              | Peru   | lineage4  | R         | R | n/a | n/a | R   | R | R | R |
| 14893_2_57 | Peru via LSHTM, UK                              | Peru   | Haarlem   | S         | S | n/a | n/a | S   | S | S | S |
| 14722_6_35 | Peru via LSHTM, UK                              | Peru   | LAM       | R         | S | n/a | n/a | R   | S | S | S |
| 14893_2_60 | Peru via LSHTM, UK                              | Peru   | Haarlem   | S         | S | n/a | n/a | S   | S | S | S |
| 14722_7_70 | Peru via LSHTM, UK                              | Peru   | lineage4  | R         | S | n/a | n/a | R   | S | S | S |
| 14892_2_60 | Peru via LSHTM, UK                              | Peru   | LAM       | R         | S | n/a | n/a | R   | S | S | S |
| 14722_7_90 | Peru via LSHTM, UK                              | Peru   | lineage4  | R         | R | n/a | n/a | R   | R | R | S |
| 14722_6_59 | Peru via LSHTM, UK                              | Peru   | lineage4  | S         | R | n/a | n/a | R   | R | R | S |
| 14722_6_48 | Peru via LSHTM, UK                              | Peru   | M. caprae | S         | S | n/a | n/a | S   | U | S | S |
| 14892_2_59 | Peru via LSHTM, UK                              | Peru   | lineage4  | S         | R | n/a | n/a | R   | R | R | S |
| 14722_7_62 | Peru via LSHTM, UK                              | Peru   | Beijing   | R         | R | n/a | n/a | R   | R | U | S |
| 14722_6_49 | Peru via LSHTM, UK                              | Peru   | S-type    | S         | S | n/a | n/a | S   | S | S | S |
| 14893_2_62 | Peru via LSHTM, UK                              | Peru   | LAM       | R         | R | n/a | n/a | R   | R | S | S |
| 14892_2_50 | Peru via LSHTM, UK                              | Peru   | LAM       | R         | R | n/a | n/a | R   | R | R | S |
| 14722_6_10 | Peru via LSHTM, UK                              | Peru   | LAM       | R         | R | n/a | n/a | R   | S | U | S |
| 14893_2_54 | Peru via LSHTM, UK                              | Peru   | Beijing   | R         | R | n/a | n/a | R   | R | S | R |
| 14722_7_74 | Peru via LSHTM, UK                              | Peru   | Haarlem   | R         | R | n/a | n/a | R   | R | S | S |
| 14892_2_42 | Peru via LSHTM, UK                              | Peru   | LAM       | R         | S | n/a | n/a | R   | S | S | S |
| 14892_2_23 | Peru via LSHTM, UK                              | Peru   | LAM       | R         | S | n/a | n/a | R   | S | S | S |
| 14892_2_58 | Peru via LSHTM, UK                              | Peru   | LAM       | R         | R | n/a | n/a | R   | R | R | U |
| 14893_2_48 | Peru via LSHTM, UK                              | Peru   | LAM       | S         | R | n/a | n/a | R   | R | R | S |
| 14893_2_59 | Peru via LSHTM, UK                              | Peru   | LAM       | R         | R | n/a | n/a | R   | R | R | R |
| 15277_3_57 | Peru via LSHTM, UK                              | Peru   | LAM       | S         | R | n/a | n/a | R   | R | S | R |
| 14892_2_7  | Peru via LSHTM, UK                              | Peru   | Haarlem   | R         | S | n/a | n/a | R   | S | S | R |
| 14892_2_12 | Peru via LSHTM, UK                              | Peru   | Beijing   | R         | R | n/a | n/a | R   | R | R | R |
| 14722_6_19 | Peru via LSHTM, UK                              | Peru   | LAM       | R         | S | n/a | n/a | R   | S | S | S |
| 14893_2_4  | Peru via LSHTM, UK                              | Peru   | LAM       | S         | R | n/a | n/a | S   | R | U | S |
| 15277_3_53 | Peru via LSHTM, UK                              | Peru   | LAM       | R         | R | n/a | n/a | R   | R | R | R |
| 14722_6_64 | Peru via LSHTM, UK                              | Peru   | lineage4  | R         | S | n/a | n/a | R   | R | R | S |
| 14722_6_18 | Peru via LSHTM, UK                              | Peru   | LAM       | R         | S | n/a | n/a | R   | S | S | S |
| 14892_2_61 | Peru via LSHTM, UK                              | Peru   | lineage4  | R         | S | n/a | n/a | F   | S | R | S |
| 14722_6_22 | Peru via LSHTM, UK                              | Peru   | M. caprae | S         | S | n/a | n/a | U   | U | S | S |
| 14893_2_53 | Peru via LSHTM, UK                              | Peru   | LAM       | R         | S | n/a | n/a | R   | S | S | S |
| 14893_2_33 | Peru via LSHTM, UK                              | Peru   | Haarlem   | R         | S | n/a | n/a | R   | S | S | S |
| 14722_7_88 | Peru via LSHTM, UK                              | Peru   | Haarlem   | R         | S | n/a | n/a | R   | S | S | S |
| 14722_7_64 | Peru via LSHTM, UK                              | Peru   | LAM       | R         | S | n/a | n/a | R   | S | S | S |
| 14722_6_40 | Peru via LSHTM, UK                              | Peru   | LAM       | R         | R | n/a | n/a | R   | R | R | U |
| 14722_6_86 | Peru via LSHTM, UK                              | Peru   | LAM       | S         | R | n/a | n/a | R   | R | S | R |
| 14722_7_61 | Peru via LSHTM, UK                              | Peru   | X-type    | R         | S | n/a | n/a | R   | S | S | S |
| 14893_2_12 | Peru via LSHTM, UK                              | Peru   | Haarlem   | S         | R | n/a | n/a | S   | R | S | S |
| 14892_2_43 | Peru via LSHTM, UK                              | Peru   | LAM       | R         | R | n/a | n/a | R   | R | R | R |
| 14722_6_41 | Peru via LSHTM, UK                              | Peru   | Beijing   | R         | S | n/a | n/a | R   | R | U | S |
| 14893_2_58 | Peru via LSHTM, UK                              | Peru   | LAM       | R         | R | n/a | n/a | R   | R | R | R |
| 14892_2_39 | Peru via LSHTM, UK                              | Peru   | LAM       | R         | R | n/a | n/a | R   | R | R | R |
| 14893_2_6  | Peru via LSHTM, UK                              | Peru   | Haarlem   | R         | R | n/a | n/a | R   | R | R | U |
| 14722_6_27 | Peru via LSHTM, UK                              | Peru   | Beijing   | S         | S | n/a | n/a | S   | S | S | S |
| 14893_2_64 | Peru via LSHTM, UK                              | Peru   | Haarlem   | R         | R | n/a | n/a | S   | U | S | S |
| 14893_2_51 | Peru via LSHTM, UK                              | Peru   | X-type    | R         | S | n/a | n/a | R   | S | S | S |
| 14892_2_37 | Peru via LSHTM, UK                              | Peru   | LAM       | R         | S | n/a | n/a | R   | S | S | S |
| 14892_2_51 | Peru via LSHTM, UK                              | Peru   | LAM       | R         | R | n/a | n/a | R   | R | R | R |
| 14893_2_56 | Peru via LSHTM, UK                              | Peru   | LAM       | R         | R | n/a | n/a | R   | R | R | U |
| 14722_7_53 | Peru via LSHTM, UK                              | Peru   | lineage4  | S         | R | n/a | n/a | S   | R | R | S |
| 14892_2_2  | Peru via LSHTM, UK                              | Peru   | Beijing   | R         | S | n/a | n/a | R   | S | S | S |
| 14722_7_81 | Peru via LSHTM, UK                              | Peru   | Haarlem   | S         | R | n/a | n/a | S   | R | S | S |
| 14892_2_20 | Peru via LSHTM, UK                              | Peru   | lineage4  | S         | S | n/a | n/a | S   | S | S | S |
| 14722_6_66 | Peru via LSHTM, UK                              | Peru   | LAM       | R         | S | n/a | n/a | R   | S | S | S |
| 14893_2_52 | Peru via LSHTM, UK                              | Peru   | lineage4  | S         | R | n/a | n/a | R   | R | S | S |
| 14893_2_66 | Peru via LSHTM, UK                              | Peru   | LAM       | R         | R | n/a | n/a | R   | R | S | R |
| 14722_6_38 | Peru via LSHTM, UK                              | Peru   | LAM       | S         | R | n/a | n/a | R   | R | S | R |
| 14893_2_29 | Peru via LSHTM, UK                              | Peru   | lineage4  | R         | R | n/a | n/a | R   | R | S | S |
| 14892_2_29 | Peru via LSHTM, UK                              | Peru   | LAM       | R         | R | n/a | n/a | R   | R | R | S |
| 14893_2_41 | Peru via LSHTM, UK                              | Peru   | Haarlem   | R         | S | n/a | n/a | R   | S | S | S |
| 14722_6_36 | Peru via LSHTM, UK                              | Peru   | Beijing   | R         | S | n/a | n/a | R   | R | S | S |
| 14893_2_46 | Peru via LSHTM, UK                              | Peru   | LAM       | R         | R | n/a | n/a | R   | R | R | U |
| 14722_6_71 | Peru via LSHTM, UK                              | Peru   | lineage4  | S         | S | n/a | n/a | S   | S | S | S |
| 14722_6_70 | Peru via LSHTM, UK                              | Peru   | Beijing   | R         | S | n/a | n/a | S   | S | S | S |
| 14893_2_24 | Peru via LSHTM, UK                              | Peru   | LAM       | R         | S | n/a | n/a | R   | S | S | S |
| 14722_6_54 | Peru via LSHTM, UK                              | Peru   | LAM       | R         | R | n/a | n/a | R   | R | S | R |
| 0528A      | Casali et. al. Nat Genet. 2014 Mar;46(3):279-86 | Russia | Haarlem   | ERR133877 | S | S   | R   | S   | S | S | S |
| 2414A      | Casali et. al. Nat Genet. 2014 Mar;46(3):279-86 | Russia | Beijing   | ERR229935 | R | S   | S   | S   | S | S | S |
| 0443H      | Casali et. al. Nat Genet. 2014 Mar;46(3):279-86 | Russia | Beijing   | ERR067627 | R | R   | S   | R   | R | R | R |
| 0293V      | Casali et. al. Nat Genet. 2014 Mar;46(3):279-86 | Russia | Beijing   | ERR133839 | R | R   | R   | R   | R | R | U |
| 1292F      | Casali et. al. Nat Genet. 2014 Mar;46(3):279-86 | Russia | Ural      | ERR108472 | S | S   | S   | S   | S | S | S |
| 0096F      | Casali et. al. Nat Genet. 2014 Mar;46(3):279-86 | Russia | Beijing   | ERR067608 | R | R   | S   | S   | R | S | S |
| 1825K      | Casali et. al. Nat Genet. 2014 Mar;46(3):279-86 | Russia | Beijing   | ERR144562 | R | R   | S   | S   | R | R | U |
| 0405R      | Casali et. al. Nat Genet. 2014 Mar;46(3):279-86 | Russia | Beijing   | ERR133860 | R | R   | S   | S   | R | R | U |
| 0259H      | Casali et. al. Nat Genet. 2014 Mar;46(3):279-86 | Russia | Beijing   | ERR133827 | R | R   | R   | R   | R | R | U |
| 2626F      | Casali et. al. Nat Genet. 2014 Mar;46(3):279-86 | Russia | lineage4  | ERR234694 | S | S   | S   | S   | S | S | S |
| 0197Q      | Casali et. al. Nat Genet. 2014 Mar;46(3):279-86 | Russia | Haarlem   | ERR133818 | S | S   | S   | S   | S | S | S |
| 0820S      | Casali et. al. Nat Genet. 2014 Mar;46(3):279-86 | Russia | Beijing   | ERR133947 | S | R   | S   | S   | S | S | S |
| 0401M      | Casali et. al. Nat Genet. 2014 Mar;46(3):279-86 | Russia | Beijing   | ERR133859 | S | S   | S   | S   | S | S | S |
| 0556F      | Casali et. al. Nat Genet. 2014 Mar;46(3):279-86 | Russia | Beijing   | ERR133885 | R | R   | R   | S   | R | R | U |
| 2180W      | Casali et. al. Nat Genet. 2014 Mar;46(3):279-86 | Russia | Beijing   | ERR228039 | R | R   | R   | R   | R | R | F |
| 2373F      | Casali et. al. Nat Genet. 2014 Mar;46(3):279-86 | Russia | Beijing   | ERR229965 | S | R   | R   | S   | R | R | R |
| 2565P      | Casali et. al. Nat Genet. 2014 Mar;46(3):279-86 | Russia | Ural      | ERR234669 | R | R   | S   | R   | R | R | S |
| 0754W      | Casali et. al. Nat Genet. 2014 Mar;46(3):279-86 | Russia | Beijing   | ERR133924 | R | S   | S   | S   | U | U | S |
| 0511G      | Casali et. al. Nat Genet. 2014 Mar;46(3):279-86 | Russia | Beijing   | ERR067761 | R | R   | S   | S   | R | R | R |
| 0589R      | Casali et. al. Nat Genet. 2014 Mar;46(3):279-86 | Russia | Beijing   | ERR133888 | R | R   | R   | S   | R | S | R |
| 0710Y      | Casali et. al. Nat Genet. 2014 Mar;46(3):279-86 | Russia | Beijing   | ERR117454 | R | R   | S   | R   | S | R | R |
| 0943B      | Casali et. al. Nat Genet. 2014 Mar;46(3):279-86 | Russia | Beijing   | ERR067643 | R | R   | R   | S   | R | R | R |
| 2482Z      | Casali et. al. Nat Genet. 2014 Mar;46(3):279-86 | Russia | LAM       | ERR229944 | S | S   | S   | U   | S | S | S |
| 1366L      | Casali et. al. Nat Genet. 2014 Mar;46(3):279-86 | Russia | Beijing   | ERR137220 | R | R   | R   | S   | R | R | U |
| 1456J      | Casali et. al. Nat Genet. 2014 Mar;46(3):279-86 | Russia | Ural      | ERR067700 | R | R   | R   | n/a | U | S | S |
| 0063V      | Casali et. al. Nat Genet. 2014 Mar;46(3):279-86 | Russia | Haarlem   | ERR133800 | R | R   | S   | S   | R | R | R |
| 2326E      | Casali et. al. Nat Genet. 2014 Mar;46(3):279-86 | Russia | Haarlem   | ERR228021 | S | S   | S   | R   | S | S | R |
| 2042W      | Casali et. al. Nat Genet. 2014 Mar;46(3):279-86 | Russia | Ural      | ERR144624 | R | R   | R   | S   | R | R | S |
| 1900R      | Casali et. al. Nat Genet. 2014 Mar;46(3):279-86 | Russia | lineage4  | ERR144592 | S | S   | S   | S   | S | S | S |
| 1626T      | Casali et. al. Nat Genet. 2014 Mar;46(3):279-86 | Russia | Beijing   | ERR067687 | R | R   | R   | R   | R | R | R |
| 1466V      | Casali et. al. Nat Genet. 2014 Mar;46(3):279-86 | Russia | Haarlem   | ERR067703 | S | S   | S   | S   | S | S | S |

|       |                                                 |        |          |           |   |   |   |   |     |   |   |   |
|-------|-------------------------------------------------|--------|----------|-----------|---|---|---|---|-----|---|---|---|
| 2597Z | Casali et. al. Nat Genet. 2014 Mar;46(3):279-86 | Russia | Ural     | ERR234691 | S | S | S | S | S   | S | S | S |
| 2344Z | Casali et. al. Nat Genet. 2014 Mar;46(3):279-86 | Russia | Beijing  | ERR229971 | R | R | R | R | R   | R | R | R |
| 0427Q | Casali et. al. Nat Genet. 2014 Mar;46(3):279-86 | Russia | Beijing  | ERR234575 | R | S | S | R | R   | S | S | F |
| 1084E | Casali et. al. Nat Genet. 2014 Mar;46(3):279-86 | Russia | lineage4 | ERR133989 | S | S | S | S | S   | U | S | S |
| 0024C | Casali et. al. Nat Genet. 2014 Mar;46(3):279-86 | Russia | lineage4 | ERR108463 | S | S | S | S | S   | S | S | S |
| 0693E | Casali et. al. Nat Genet. 2014 Mar;46(3):279-86 | Russia | Beijing  | ERR234642 | S | S | S | S | S   | S | U | S |
| 0539M | Casali et. al. Nat Genet. 2014 Mar;46(3):279-86 | Russia | Beijing  | ERR234600 | R | R | R | R | R   | R | R | R |
| 1513W | Casali et. al. Nat Genet. 2014 Mar;46(3):279-86 | Russia | Beijing  | ERR137240 | R | S | R | S | R   | S | R | S |
| 0309M | Casali et. al. Nat Genet. 2014 Mar;46(3):279-86 | Russia | Haarlem  | ERR067603 | R | R | R | R | R   | R | R | R |
| 0773R | Casali et. al. Nat Genet. 2014 Mar;46(3):279-86 | Russia | Beijing  | ERR133930 | R | R | S | S | R   | R | R | U |
| 2467H | Casali et. al. Nat Genet. 2014 Mar;46(3):279-86 | Russia | Beijing  | ERR229999 | R | S | R | S | R   | S | R | S |
| 1176E | Casali et. al. Nat Genet. 2014 Mar;46(3):279-86 | Russia | Beijing  | ERR137195 | S | S | S | S | S   | S | U | S |
| 0432W | Casali et. al. Nat Genet. 2014 Mar;46(3):279-86 | Russia | Beijing  | ERR133862 | R | S | S | S | R   | S | R | S |
| 0416D | Casali et. al. Nat Genet. 2014 Mar;46(3):279-86 | Russia | Beijing  | ERR067745 | R | S | S | S | R   | S | R | S |
| 2507B | Casali et. al. Nat Genet. 2014 Mar;46(3):279-86 | Russia | Haarlem  | ERR229938 | S | S | S | R | S   | S | S | S |
| 0132V | Casali et. al. Nat Genet. 2014 Mar;46(3):279-86 | Russia | Ural     | ERR133809 | R | S | S | S | R   | S | S | S |
| 0995H | Casali et. al. Nat Genet. 2014 Mar;46(3):279-86 | Russia | Beijing  | ERR133979 | S | S | S | S | S   | S | S | S |
| 0395F | Casali et. al. Nat Genet. 2014 Mar;46(3):279-86 | Russia | Beijing  | ERR133855 | R | R | S | S | R   | R | S | S |
| 1673V | Casali et. al. Nat Genet. 2014 Mar;46(3):279-86 | Russia | Ural     | ERR108509 | S | S | S | S | S   | S | S | S |
| 1605W | Casali et. al. Nat Genet. 2014 Mar;46(3):279-86 | Russia | Beijing  | ERR067717 | R | R | R | S | R   | R | R | F |
| 1805N | Casali et. al. Nat Genet. 2014 Mar;46(3):279-86 | Russia | Beijing  | ERR144552 | S | S | S | S | S   | S | U | S |
| 0640X | Casali et. al. Nat Genet. 2014 Mar;46(3):279-86 | Russia | LAM      | ERR067599 | R | R | R | S | R   | R | R | S |
| 1921P | Casali et. al. Nat Genet. 2014 Mar;46(3):279-86 | Russia | Beijing  | ERR144600 | R | R | R | S | R   | R | R | U |
| 0040V | Casali et. al. Nat Genet. 2014 Mar;46(3):279-86 | Russia | Beijing  | ERR234596 | R | R | R | S | R   | R | R | U |
| 1054X | Casali et. al. Nat Genet. 2014 Mar;46(3):279-86 | Russia | LAM      | ERR133985 | R | S | S | S | R   | S | S | S |
| 1559W | Casali et. al. Nat Genet. 2014 Mar;46(3):279-86 | Russia | Beijing  | ERR067715 | R | R | R | S | R   | U | F | F |
| 1645P | Casali et. al. Nat Genet. 2014 Mar;46(3):279-86 | Russia | Beijing  | ERR108505 | S | S | S | S | S   | S | S | S |
| 0660T | Casali et. al. Nat Genet. 2014 Mar;46(3):279-86 | Russia | Ural     | ERR234586 | S | S | S | S | U   | S | S | S |
| 2294V | Casali et. al. Nat Genet. 2014 Mar;46(3):279-86 | Russia | Beijing  | ERR228043 | R | R | S | R | R   | R | R | R |
| 0991D | Casali et. al. Nat Genet. 2014 Mar;46(3):279-86 | Russia | Haarlem  | ERR108482 | R | R | S | S | R   | R | R | R |
| 1418S | Casali et. al. Nat Genet. 2014 Mar;46(3):279-86 | Russia | Haarlem  | ERR137228 | R | S | S | S | R   | S | S | S |
| 0752T | Casali et. al. Nat Genet. 2014 Mar;46(3):279-86 | Russia | LAM      | ERR133922 | R | R | S | S | R   | R | R | S |
| 1849L | Casali et. al. Nat Genet. 2014 Mar;46(3):279-86 | Russia | Ural     | ERR144569 | S | S | S | S | S   | S | S | S |
| 2396F | Casali et. al. Nat Genet. 2014 Mar;46(3):279-86 | Russia | lineage4 | ERR229990 | S | R | R | S | S   | R | S | S |
| 0070C | Casali et. al. Nat Genet. 2014 Mar;46(3):279-86 | Russia | Beijing  | ERR108501 | S | S | S | S | S   | S | S | S |
| 1949V | Casali et. al. Nat Genet. 2014 Mar;46(3):279-86 | Russia | Beijing  | ERR108453 | R | R | R | R | R   | R | R | R |
| 1769Z | Casali et. al. Nat Genet. 2014 Mar;46(3):279-86 | Russia | Beijing  | ERR144542 | R | R | S | R | R   | R | S | R |
| 2585L | Casali et. al. Nat Genet. 2014 Mar;46(3):279-86 | Russia | Haarlem  | ERR234684 | S | S | S | S | S   | S | S | S |
| 1831R | Casali et. al. Nat Genet. 2014 Mar;46(3):279-86 | Russia | Beijing  | ERR144564 | R | S | S | S | R   | S | S | S |
| 0940Y | Casali et. al. Nat Genet. 2014 Mar;46(3):279-86 | Russia | Beijing  | ERR067641 | R | R | S | R | R   | R | R | R |
| 2559H | Casali et. al. Nat Genet. 2014 Mar;46(3):279-86 | Russia | lineage4 | ERR234667 | S | S | S | S | S   | U | U | S |
| 1024P | Casali et. al. Nat Genet. 2014 Mar;46(3):279-86 | Russia | LAM      | ERR108487 | S | S | S | S | U   | S | S | S |
| 0228Z | Casali et. al. Nat Genet. 2014 Mar;46(3):279-86 | Russia | Beijing  | ERR133820 | S | S | S | S | S   | S | U | S |
| 0831E | Casali et. al. Nat Genet. 2014 Mar;46(3):279-86 | Russia | Beijing  | ERR067653 | R | R | R | S | R   | R | R | R |
| 1067L | Casali et. al. Nat Genet. 2014 Mar;46(3):279-86 | Russia | lineage4 | ERR108427 | S | S | S | S | S   | S | S | S |
| 2227X | Casali et. al. Nat Genet. 2014 Mar;46(3):279-86 | Russia | LAM      | ERR228009 | R | R | S | S | R   | R | R | S |
| 0545T | Casali et. al. Nat Genet. 2014 Mar;46(3):279-86 | Russia | Ural     | ERR234616 | R | R | S | S | R   | S | U | S |
| 2339T | Casali et. al. Nat Genet. 2014 Mar;46(3):279-86 | Russia | Beijing  | ERR229931 | R | R | R | R | R   | R | R | R |
| 1815Z | Casali et. al. Nat Genet. 2014 Mar;46(3):279-86 | Russia | Beijing  | ERR144556 | R | R | S | S | F   | F | F | F |
| 1473C | Casali et. al. Nat Genet. 2014 Mar;46(3):279-86 | Russia | Beijing  | ERR067709 | R | R | R | R | R   | R | R | R |
| 0630L | Casali et. al. Nat Genet. 2014 Mar;46(3):279-86 | Russia | Beijing  | ERR067766 | S | S | S | S | S   | S | U | S |
| 2071C | Casali et. al. Nat Genet. 2014 Mar;46(3):279-86 | Russia | Beijing  | ERR144631 | R | R | R | S | R   | R | R | S |
| 0903H | Casali et. al. Nat Genet. 2014 Mar;46(3):279-86 | Russia | Beijing  | ERR133968 | R | S | S | S | R   | S | S | S |
| 0839N | Casali et. al. Nat Genet. 2014 Mar;46(3):279-86 | Russia | Beijing  | ERR067659 | R | R | S | S | R   | R | R | S |
| 0013Q | Casali et. al. Nat Genet. 2014 Mar;46(3):279-86 | Russia | Haarlem  | ERR108459 | S | S | S | S | S   | S | S | S |
| 1545F | Casali et. al. Nat Genet. 2014 Mar;46(3):279-86 | Russia | Beijing  | ERR117465 | R | R | S | S | S   | S | U | S |
| 0398J | Casali et. al. Nat Genet. 2014 Mar;46(3):279-86 | Russia | LAM      | ERR067624 | R | R | S | S | S   | S | S | S |
| 1086G | Casali et. al. Nat Genet. 2014 Mar;46(3):279-86 | Russia | lineage4 | ERR108448 | S | S | S | S | S   | S | S | S |
| 0133W | Casali et. al. Nat Genet. 2014 Mar;46(3):279-86 | Russia | Beijing  | ERR133810 | S | S | S | S | S   | S | S | S |
| 0915W | Casali et. al. Nat Genet. 2014 Mar;46(3):279-86 | Russia | Beijing  | ERR067673 | R | R | S | S | R   | R | R | U |
| 0269T | Casali et. al. Nat Genet. 2014 Mar;46(3):279-86 | Russia | lineage4 | ERR133830 | S | S | S | S | S   | S | S | S |
| 0344A | Casali et. al. Nat Genet. 2014 Mar;46(3):279-86 | Russia | LAM      | ERR067612 | R | S | S | R | U   | R | R | R |
| 0548X | Casali et. al. Nat Genet. 2014 Mar;46(3):279-86 | Russia | Ural     | ERR067731 | S | S | S | S | U   | S | S | S |
| 1524H | Casali et. al. Nat Genet. 2014 Mar;46(3):279-86 | Russia | Haarlem  | ERR108449 | S | R | R | R | n/a | S | S | S |
| 0457Y | Casali et. al. Nat Genet. 2014 Mar;46(3):279-86 | Russia | Haarlem  | ERR067751 | S | S | S | R | S   | S | S | S |
| 1617J | Casali et. al. Nat Genet. 2014 Mar;46(3):279-86 | Russia | lineage4 | ERR067685 | S | R | S | S | S   | R | S | S |
| 2367Z | Casali et. al. Nat Genet. 2014 Mar;46(3):279-86 | Russia | Haarlem  | ERR229925 | R | S | S | S | R   | S | S | S |
| 0788H | Casali et. al. Nat Genet. 2014 Mar;46(3):279-86 | Russia | lineage4 | ERR133939 | S | S | S | S | S   | S | S | S |
| 0292T | Casali et. al. Nat Genet. 2014 Mar;46(3):279-86 | Russia | Beijing  | ERR234590 | R | R | R | S | R   | R | R | U |
| 1592G | Casali et. al. Nat Genet. 2014 Mar;46(3):279-86 | Russia | lineage4 | ERR108432 | S | S | S | S | S   | S | S | S |
| 2520Q | Casali et. al. Nat Genet. 2014 Mar;46(3):279-86 | Russia | Beijing  | ERR234652 | S | S | S | S | S   | S | U | S |
| 1353X | Casali et. al. Nat Genet. 2014 Mar;46(3):279-86 | Russia | Beijing  | ERR137216 | R | S | S | R | R   | S | R | R |
| 2290Q | Casali et. al. Nat Genet. 2014 Mar;46(3):279-86 | Russia | Beijing  | ERR228027 | S | S | S | S | S   | S | S | S |
| 1392P | Casali et. al. Nat Genet. 2014 Mar;46(3):279-86 | Russia | Beijing  | ERR137223 | R | R | R | S | R   | R | R | U |
| 2133V | Casali et. al. Nat Genet. 2014 Mar;46(3):279-86 | Russia | Beijing  | ERR158588 | R | R | R | R | R   | R | R | F |
| 0889S | Casali et. al. Nat Genet. 2014 Mar;46(3):279-86 | Russia | Haarlem  | ERR133965 | S | S | S | S | S   | S | S | S |
| 0177T | Casali et. al. Nat Genet. 2014 Mar;46(3):279-86 | Russia | Beijing  | ERR067580 | S | S | S | S | S   | S | S | S |
| 0629K | Casali et. al. Nat Genet. 2014 Mar;46(3):279-86 | Russia | Beijing  | ERR117453 | R | R | S | S | R   | R | R | F |
| 2438B | Casali et. al. Nat Genet. 2014 Mar;46(3):279-86 | Russia | Haarlem  | ERR229959 | S | S | S | R | S   | U | S | S |
| 2084R | Casali et. al. Nat Genet. 2014 Mar;46(3):279-86 | Russia | Beijing  | ERR158572 | S | S | R | S | U   | S | S | S |
| 1616H | Casali et. al. Nat Genet. 2014 Mar;46(3):279-86 | Russia | Ural     | ERR067684 | S | S | S | S | S   | S | S | S |
| 1595K | Casali et. al. Nat Genet. 2014 Mar;46(3):279-86 | Russia | Beijing  | ERR108435 | R | R | S | R | R   | R | R | R |
| 2033L | Casali et. al. Nat Genet. 2014 Mar;46(3):279-86 | Russia | Beijing  | ERR144620 | R | R | R | R | R   | R | R | R |
| 0659S | Casali et. al. Nat Genet. 2014 Mar;46(3):279-86 | Russia | lineage4 | ERR234578 | S | S | S | S | S   | S | S | S |
| 0051G | Casali et. al. Nat Genet. 2014 Mar;46(3):279-86 | Russia | Beijing  | ERR234620 | R | S | R | S | R   | S | S | S |
| 1193Y | Casali et. al. Nat Genet. 2014 Mar;46(3):279-86 | Russia | LAM      | ERR067679 | R | R | S | S | R   | R | R | S |
| 2473P | Casali et. al. Nat Genet. 2014 Mar;46(3):279-86 | Russia | Beijing  | ERR229920 | S | S | S | S | S   | S | U | R |
| 0899D | Casali et. al. Nat Genet. 2014 Mar;46(3):279-86 | Russia | Beijing  | ERR133966 | R | R | S | S | R   | R | R | F |
| 2385T | Casali et. al. Nat Genet. 2014 Mar;46(3):279-86 | Russia | Beijing  | ERR229918 | R | R | R | S | R   | F | F | F |
| 0296Y | Casali et. al. Nat Genet. 2014 Mar;46(3):279-86 | Russia | Beijing  | ERR133840 | S | S | S | S | S   | S | S | S |
| 0649G | Casali et. al. Nat Genet. 2014 Mar;46(3):279-86 | Russia | Beijing  | ERR234641 | R | R | S | S | R   | R | R | U |
| 1561Y | Casali et. al. Nat Genet. 2014 Mar;46(3):279-86 | Russia | Beijing  | ERR117467 | S | S | S | S | S   | S | S | S |
| 1250K | Casali et. al. Nat Genet. 2014 Mar;46(3):279-86 | Russia | Beijing  | ERR137206 | R | R | S | S | R   | F | F | F |
| 0847X | Casali et. al. Nat Genet. 2014 Mar;46(3):279-86 | Russia | lineage4 | ERR067666 | S | S | S | S | S   | R | S | S |
| 1890F | Casali et. al. Nat Genet. 2014 Mar;46(3):279-86 | Russia | Beijing  | ERR144588 | R | S | S | S | R   | S | S | S |
| 0951K | Casali et. al. Nat Genet. 2014 Mar;46(3):279-86 | Russia | Beijing  | ERR067674 | R | R | R | S | R   | R | R | U |
| 2405Q | Casali et. al. Nat Genet. 2014 Mar;46(3):279-86 | Russia | Beijing  | ERR230006 | R | R | R | S | R   | F | S | S |
| 2478V | Casali et. al. Nat Genet. 2014 Mar;46(3):279-86 | Russia | LAM      | ERR229928 | S | S | S | R | S   | S | S | S |
| 0438C | Casali et. al. Nat Genet. 2014 Mar;46(3):279-86 | Russia | Beijing  | ERR067625 | R | R | R | S | R   | R | R | U |
| 0757Z | Casali et. al. Nat Genet. 2014 Mar;46(3):279-86 | Russia | Beijing  | ERR133926 | S | S | S | S | S   | S | S | S |
| 2484B | Casali et. al. Nat Genet. 2014 Mar;46(3):279-86 | Russia | Beijing  | ERR229960 | R | R | S | S | R   | R | R | U |
| 0159Z | Casali et. al. Nat Genet. 2014 Mar;46(3):279-86 | Russia | lineage4 | ERR067719 | R | S | R | S | S   | S | U | S |
| 0868V | Casali et. al. Nat Genet. 2014 Mar;46(3):279-86 | Russia | Beijing  | ERR133958 | S | S | S | S | S   | S | S | S |
| 0720J | Casali et. al. Nat Genet. 2014 Mar;46(3):279-86 | Russia | Beijing  | ERR133913 | R | S | S | S | R   | S | U | S |
| 0469L | Casali et. al. Nat Genet. 2014 Mar;46(3):279-86 | Russia | Beijing  | ERR234560 | R | R | R | S | R   | R | R | U |
| 0547W | Casali et. al. Nat Genet. 2014 Mar;46(3):279-86 | Russia | Haarlem  | ERR067730 | S | S | S | S | U   | S | S | S |
| 1917K | Casali et. al. Nat Genet. 2014 Mar;46(3):279-86 | Russia | Beijing  | ERR144597 | R | R | S | S | R   | R | R | U |
| 1492Y | Casali et. al. Nat Genet. 2014 Mar;46(3):279-86 | Russia | Beijing  | ERR227982 | R | R | R | S | R   | R | R | S |
| 0188F | Casali et. al. Nat Genet. 2014 Mar;46(3):279-86 | Russia | Beijing  | ERR067721 | R | R | R | S |     |   |   |   |



|       |                                                 |        |          |           |   |   |   |     |   |   |   |   |
|-------|-------------------------------------------------|--------|----------|-----------|---|---|---|-----|---|---|---|---|
| 0840P | Casali et. al. Nat Genet. 2014 Mar;46(3):279-86 | Russia | Beijing  | ERR067660 | R | R | S | R   | R | R | R | S |
| 0018W | Casali et. al. Nat Genet. 2014 Mar;46(3):279-86 | Russia | Haarlem  | ERR108461 | S | S | S | S   | S | S | U | S |
| 0833G | Casali et. al. Nat Genet. 2014 Mar;46(3):279-86 | Russia | Beijing  | ERR067654 | R | R | R | n/a | R | S | R | U |
| 1920N | Casali et. al. Nat Genet. 2014 Mar;46(3):279-86 | Russia | Beijing  | ERR144599 | R | S | S | S   | R | S | S | S |
| 1472B | Casali et. al. Nat Genet. 2014 Mar;46(3):279-86 | Russia | lineage4 | ERR067708 | S | S | S | S   | S | S | S | S |
| 1017G | Casali et. al. Nat Genet. 2014 Mar;46(3):279-86 | Russia | Beijing  | ERR108486 | S | S | S | S   | S | S | U | S |
| 0286M | Casali et. al. Nat Genet. 2014 Mar;46(3):279-86 | Russia | LAM      | ERR117450 | S | S | S | S   | S | S | S | S |
| 2286L | Casali et. al. Nat Genet. 2014 Mar;46(3):279-86 | Russia | LAM      | ERR228011 | S | S | S | S   | S | S | S | S |
| 2111W | Casali et. al. Nat Genet. 2014 Mar;46(3):279-86 | Russia | Ural     | ERR158582 | S | S | S | S   | S | S | S | S |
| 1717S | Casali et. al. Nat Genet. 2014 Mar;46(3):279-86 | Russia | Beijing  | ERR137268 | S | S | S | S   | S | S | S | S |
| 1570H | Casali et. al. Nat Genet. 2014 Mar;46(3):279-86 | Russia | Beijing  | ERR137247 | R | R | R | R   | R | R | R | R |
| 0200T | Casali et. al. Nat Genet. 2014 Mar;46(3):279-86 | Russia | Ural     | ERR133819 | S | S | S | S   | U | S | S | S |
| 0665Z | Casali et. al. Nat Genet. 2014 Mar;46(3):279-86 | Russia | Beijing  | ERR234610 | R | R | S | S   | R | R | R | S |
| 0277C | Casali et. al. Nat Genet. 2014 Mar;46(3):279-86 | Russia | lineage4 | ERR133833 | S | S | S | S   | S | S | S | S |
| 0996J | Casali et. al. Nat Genet. 2014 Mar;46(3):279-86 | Russia | lineage4 | ERR133980 | R | S | S | S   | S | S | U | S |
| 2594W | Casali et. al. Nat Genet. 2014 Mar;46(3):279-86 | Russia | Beijing  | ERR234690 | S | S | S | S   | S | S | S | S |
| 0838M | Casali et. al. Nat Genet. 2014 Mar;46(3):279-86 | Russia | LAM      | ERR067658 | S | S | S | S   | S | S | S | S |
| 1945Q | Casali et. al. Nat Genet. 2014 Mar;46(3):279-86 | Russia | Ural     | ERR144603 | S | S | S | S   | S | S | S | S |
| 2291R | Casali et. al. Nat Genet. 2014 Mar;46(3):279-86 | Russia | lineage4 | ERR228035 | S | S | S | S   | S | S | S | S |
| 1060D | Casali et. al. Nat Genet. 2014 Mar;46(3):279-86 | Russia | Beijing  | ERR108423 | R | S | S | R   | R | S | S | U |
| 0799V | Casali et. al. Nat Genet. 2014 Mar;46(3):279-86 | Russia | Beijing  | ERR133944 | R | R | S | S   | R | R | R | U |
| 1187R | Casali et. al. Nat Genet. 2014 Mar;46(3):279-86 | Russia | lineage4 | ERR067676 | S | S | S | S   | S | S | S | S |
| 0944C | Casali et. al. Nat Genet. 2014 Mar;46(3):279-86 | Russia | Beijing  | ERR067644 | R | R | R | R   | R | R | R | R |
| 1773D | Casali et. al. Nat Genet. 2014 Mar;46(3):279-86 | Russia | Beijing  | ERR144545 | R | S | S | R   | R | S | S | R |
| 0384T | Casali et. al. Nat Genet. 2014 Mar;46(3):279-86 | Russia | Beijing  | ERR067740 | S | S | S | S   | S | S | S | S |
| 0896A | Casali et. al. Nat Genet. 2014 Mar;46(3):279-86 | Russia | Beijing  | ERR234563 | R | R | S | R   | R | R | R | S |
| 2006G | Casali et. al. Nat Genet. 2014 Mar;46(3):279-86 | Russia | Beijing  | ERR144607 | R | R | R | R   | R | R | R | R |
| 1901S | Casali et. al. Nat Genet. 2014 Mar;46(3):279-86 | Russia | Beijing  | ERR144593 | R | R | S | S   | R | R | R | U |
| 2589Q | Casali et. al. Nat Genet. 2014 Mar;46(3):279-86 | Russia | Ural     | ERR234686 | S | S | S | S   | S | S | S | S |
| 2199R | Casali et. al. Nat Genet. 2014 Mar;46(3):279-86 | Russia | Ural     | ERR227992 | S | S | S | S   | S | S | S | S |
| 2501V | Casali et. al. Nat Genet. 2014 Mar;46(3):279-86 | Russia | Beijing  | ERR229993 | R | R | R | R   | R | R | R | U |
| 0978P | Casali et. al. Nat Genet. 2014 Mar;46(3):279-86 | Russia | Beijing  | ERR108475 | R | R | R | S   | R | R | R | U |
| 1042J | Casali et. al. Nat Genet. 2014 Mar;46(3):279-86 | Russia | Beijing  | ERR133983 | S | S | S | S   | S | S | S | S |
| 1596L | Casali et. al. Nat Genet. 2014 Mar;46(3):279-86 | Russia | Beijing  | ERR108436 | R | R | R | S   | R | R | R | U |
| 0887Q | Casali et. al. Nat Genet. 2014 Mar;46(3):279-86 | Russia | Beijing  | ERR133963 | R | S | S | S   | R | S | S | S |
| 0942A | Casali et. al. Nat Genet. 2014 Mar;46(3):279-86 | Russia | Beijing  | ERR133975 | R | S | S | S   | R | S | S | S |
| 0786F | Casali et. al. Nat Genet. 2014 Mar;46(3):279-86 | Russia | lineage4 | ERR133937 | R | R | S | S   | R | S | U | S |
| 0639W | Casali et. al. Nat Genet. 2014 Mar;46(3):279-86 | Russia | Beijing  | ERR133898 | S | S | S | S   | S | S | S | S |
| 0601E | Casali et. al. Nat Genet. 2014 Mar;46(3):279-86 | Russia | Ural     | ERR234561 | R | S | S | R   | S | S | S | S |
| 0448N | Casali et. al. Nat Genet. 2014 Mar;46(3):279-86 | Russia | Ural     | ERR067748 | R | R | S | S   | R | R | R | S |
| 2323B | Casali et. al. Nat Genet. 2014 Mar;46(3):279-86 | Russia | Ural     | ERR227997 | R | S | S | S   | R | S | S | S |
| 0311P | Casali et. al. Nat Genet. 2014 Mar;46(3):279-86 | Russia | Beijing  | ERR133844 | R | R | R | S   | R | R | R | R |
| 2072D | Casali et. al. Nat Genet. 2014 Mar;46(3):279-86 | Russia | Beijing  | ERR144632 | R | R | R | S   | R | R | R | U |
| 1770A | Casali et. al. Nat Genet. 2014 Mar;46(3):279-86 | Russia | Beijing  | ERR144543 | R | R | S | S   | R | R | R | U |
| 2211E | Casali et. al. Nat Genet. 2014 Mar;46(3):279-86 | Russia | Beijing  | ERR228048 | R | S | S | S   | R | S | S | S |
| 0459A | Casali et. al. Nat Genet. 2014 Mar;46(3):279-86 | Russia | LAM      | ERR067591 | R | R | R | S   | S | U | S | S |
| 1633B | Casali et. al. Nat Genet. 2014 Mar;46(3):279-86 | Russia | Beijing  | ERR067689 | S | S | S | S   | S | S | S | S |
| 0352J | Casali et. al. Nat Genet. 2014 Mar;46(3):279-86 | Russia | Beijing  | ERR067694 | R | R | S | S   | R | R | R | S |
| 0468K | Casali et. al. Nat Genet. 2014 Mar;46(3):279-86 | Russia | Beijing  | ERR234647 | S | S | S | S   | S | S | S | S |
| 0498S | Casali et. al. Nat Genet. 2014 Mar;46(3):279-86 | Russia | Haarlem  | ERR133870 | S | S | S | S   | S | S | S | S |
| 0617X | Casali et. al. Nat Genet. 2014 Mar;46(3):279-86 | Russia | lineage4 | ERR133897 | S | S | S | S   | S | S | S | S |
| 0367A | Casali et. al. Nat Genet. 2014 Mar;46(3):279-86 | Russia | Beijing  | ERR067695 | R | R | S | S   | R | R | R | U |
| 0916X | Casali et. al. Nat Genet. 2014 Mar;46(3):279-86 | Russia | Beijing  | ERR117458 | S | S | S | S   | S | S | S | S |
| 0748P | Casali et. al. Nat Genet. 2014 Mar;46(3):279-86 | Russia | Beijing  | ERR133919 | R | R | R | S   | R | R | R | S |
| 2381P | Casali et. al. Nat Genet. 2014 Mar;46(3):279-86 | Russia | Beijing  | ERR229997 | R | R | S | S   | R | R | R | S |
| 0520R | Casali et. al. Nat Genet. 2014 Mar;46(3):279-86 | Russia | lineage4 | ERR133874 | S | S | S | S   | S | S | S | S |
| 0346C | Casali et. al. Nat Genet. 2014 Mar;46(3):279-86 | Russia | Ural     | ERR133849 | R | R | S | R   | R | R | R | S |
| 1636E | Casali et. al. Nat Genet. 2014 Mar;46(3):279-86 | Russia | Ural     | ERR067691 | R | R | S | S   | R | R | R | S |
| 1506N | Casali et. al. Nat Genet. 2014 Mar;46(3):279-86 | Russia | Beijing  | ERR117462 | R | R | S | S   | R | R | R | S |
| 0023B | Casali et. al. Nat Genet. 2014 Mar;46(3):279-86 | Russia | Haarlem  | ERR234580 | S | S | S | S   | S | S | S | S |
| 0435Z | Casali et. al. Nat Genet. 2014 Mar;46(3):279-86 | Russia | Beijing  | ERR133865 | R | S | S | S   | R | S | S | S |
| 2273X | Casali et. al. Nat Genet. 2014 Mar;46(3):279-86 | Russia | Beijing  | ERR228042 | R | R | S | R   | R | R | R | F |
| 1766W | Casali et. al. Nat Genet. 2014 Mar;46(3):279-86 | Russia | LAM      | ERR137284 | R | R | R | R   | R | R | R | U |
| 1446Y | Casali et. al. Nat Genet. 2014 Mar;46(3):279-86 | Russia | Beijing  | ERR137231 | R | R | R | S   | R | R | R | R |
| 0878F | Casali et. al. Nat Genet. 2014 Mar;46(3):279-86 | Russia | Beijing  | ERR108441 | S | S | S | S   | S | S | S | S |
| 0319Y | Casali et. al. Nat Genet. 2014 Mar;46(3):279-86 | Russia | LAM      | ERR133846 | S | S | S | S   | S | S | S | S |
| 0613S | Casali et. al. Nat Genet. 2014 Mar;46(3):279-86 | Russia | Beijing  | ERR234585 | R | S | S | S   | R | S | S | S |
| 2095D | Casali et. al. Nat Genet. 2014 Mar;46(3):279-86 | Russia | Beijing  | ERR158580 | R | R | S | R   | R | R | R | S |
| 1864C | Casali et. al. Nat Genet. 2014 Mar;46(3):279-86 | Russia | Beijing  | ERR144577 | S | S | S | S   | S | S | S | S |
| 2010L | Casali et. al. Nat Genet. 2014 Mar;46(3):279-86 | Russia | Beijing  | ERR144610 | S | S | S | S   | S | S | S | S |
| 1070P | Casali et. al. Nat Genet. 2014 Mar;46(3):279-86 | Russia | Beijing  | ERR133987 | S | S | S | S   | S | S | S | S |
| 1660F | Casali et. al. Nat Genet. 2014 Mar;46(3):279-86 | Russia | lineage4 | ERR108508 | S | S | S | S   | S | S | S | S |
| 0044Z | Casali et. al. Nat Genet. 2014 Mar;46(3):279-86 | Russia | Beijing  | ERR067618 | R | R | S | R   | R | R | R | R |
| 2035N | Casali et. al. Nat Genet. 2014 Mar;46(3):279-86 | Russia | Beijing  | ERR144622 | R | R | R | R   | R | R | R | R |
| 0593W | Casali et. al. Nat Genet. 2014 Mar;46(3):279-86 | Russia | Beijing  | ERR133892 | R | R | R | n/a | R | R | R | U |
| 2280E | Casali et. al. Nat Genet. 2014 Mar;46(3):279-86 | Russia | Beijing  | ERR227987 | R | R | S | S   | R | R | R | S |
| 0281G | Casali et. al. Nat Genet. 2014 Mar;46(3):279-86 | Russia | lineage4 | ERR133836 | R | R | S | S   | S | S | S | S |
| 2318W | Casali et. al. Nat Genet. 2014 Mar;46(3):279-86 | Russia | Beijing  | ERR228068 | S | S | S | S   | S | S | S | S |
| 2366Y | Casali et. al. Nat Genet. 2014 Mar;46(3):279-86 | Russia | LAM      | ERR229917 | S | S | S | S   | S | S | S | S |
| 0415C | Casali et. al. Nat Genet. 2014 Mar;46(3):279-86 | Russia | Beijing  | ERR067744 | R | R | S | S   | R | R | R | S |
| 2382Q | Casali et. al. Nat Genet. 2014 Mar;46(3):279-86 | Russia | Beijing  | ERR230005 | R | R | R | R   | R | R | R | U |
| 0910Q | Casali et. al. Nat Genet. 2014 Mar;46(3):279-86 | Russia | Haarlem  | ERR067670 | R | S | S | S   | R | S | R | S |
| 0544S | Casali et. al. Nat Genet. 2014 Mar;46(3):279-86 | Russia | LAM      | ERR067729 | S | S | S | S   | U | S | S | S |
| 2216K | Casali et. al. Nat Genet. 2014 Mar;46(3):279-86 | Russia | Beijing  | ERR227977 | R | R | R | S   | R | R | R | U |
| 2127N | Casali et. al. Nat Genet. 2014 Mar;46(3):279-86 | Russia | Beijing  | ERR158585 | R | R | R | S   | R | R | R | S |
| 1519C | Casali et. al. Nat Genet. 2014 Mar;46(3):279-86 | Russia | Beijing  | ERR137242 | R | S | S | S   | R | S | R | S |
| 0897B | Casali et. al. Nat Genet. 2014 Mar;46(3):279-86 | Russia | Beijing  | ERR108458 | R | R | S | S   | R | R | R | U |
| 2505Z | Casali et. al. Nat Genet. 2014 Mar;46(3):279-86 | Russia | Beijing  | ERR229922 | R | R | R | S   | R | R | R | S |
| 2139B | Casali et. al. Nat Genet. 2014 Mar;46(3):279-86 | Russia | Beijing  | ERR158591 | S | S | S | R   | S | S | S | S |
| 2433W | Casali et. al. Nat Genet. 2014 Mar;46(3):279-86 | Russia | LAM      | ERR229943 | S | S | S | S   | S | S | S | S |
| 1942M | Casali et. al. Nat Genet. 2014 Mar;46(3):279-86 | Russia | lineage4 | ERR144602 | S | S | S | S   | S | F | S | S |
| 0734Z | Casali et. al. Nat Genet. 2014 Mar;46(3):279-86 | Russia | Beijing  | ERR117455 | S | S | S | S   | S | S | S | S |
| 0195N | Casali et. al. Nat Genet. 2014 Mar;46(3):279-86 | Russia | Haarlem  | ERR234558 | S | S | S | R   | S | U | S | S |
| 0575B | Casali et. al. Nat Genet. 2014 Mar;46(3):279-86 | Russia | Ural     | ERR234648 | R | R | S | S   | R | R | R | S |
| 0364X | Casali et. al. Nat Genet. 2014 Mar;46(3):279-86 | Russia | LAM      | ERR133851 | S | S | S | S   | U | S | S | S |
| 0322B | Casali et. al. Nat Genet. 2014 Mar;46(3):279-86 | Russia | Beijing  | ERR234598 | R | R | R | S   | R | R | R | U |
| 2234E | Casali et. al. Nat Genet. 2014 Mar;46(3):279-86 | Russia | Beijing  | ERR228017 | R | R | S | S   | R | R | R | U |
| 0604H | Casali et. al. Nat Genet. 2014 Mar;46(3):279-86 | Russia | Ural     | ERR234577 | R | S | S | S   | R | S | S | S |
| 0233E | Casali et. al. Nat Genet. 2014 Mar;46(3):279-86 | Russia | Beijing  | ERR067586 | R | S | R | R   | R | S | R | R |
| 2526X | Casali et. al. Nat Genet. 2014 Mar;46(3):279-86 | Russia | Ural     | ERR234654 | R | R | R | S   | R | R | R | S |
| 0125M | Casali et. al. Nat Genet. 2014 Mar;46(3):279-86 | Russia | Beijing  | ERR133805 | R | R | S | R   | R | R | R | R |
| 2097F | Casali et. al. Nat Genet. 2014 Mar;46(3):279-86 | Russia | Beijing  | ERR158581 | R | R | R | S   | R | R | R | S |
| 0793N | Casali et. al. Nat Genet. 2014 Mar;46(3):279-86 | Russia | Haarlem  | ERR133942 | R | R | R | R   | R | R | R | R |
| 1627V | Casali et. al. Nat Genet. 2014 Mar;46(3):279-86 | Russia | Beijing  | ERR067688 | S | S | S | S   | S | S | S | S |
| 0217M | Casali et. al. Nat Genet. 2014 Mar;46(3):279-86 | Russia | Beijing  | ERR067583 | R | R | R | S   | R | R | R | U |
| 2514J | Casali et. al. Nat Genet. 2014 Mar;46(3):279-86 | Russia | Beijing  | ERR229978 | R | R | R | S   | R | R | R | S |
| 0888R | Casali et. al. Nat Genet. 2014 Mar;46(3):279-86 | Russia | lineage4 | ERR133964 | S | S | S | S   | S | S | S | S |
| 0658R | Casali et. al. Nat Genet. 2014 Mar;46(3):279-86 | Russia | Beijing  | ERR234570 | R | R | S | S   | R | R | R | U |
| 1082C | Casali et. al. Nat Genet. 2014 Mar;46(3):279-86 | Russia | Beijing  | ERR108447 | R | S | S | S   | R | S | R |   |



|       |                                                 |        |          |           |   |   |   |   |   |   |   |   |
|-------|-------------------------------------------------|--------|----------|-----------|---|---|---|---|---|---|---|---|
| 2243P | Casali et. al. Nat Genet. 2014 Mar;46(3):279-86 | Russia | Beijing  | ERR228049 | R | R | R | R | R | R | R | F |
| 1461P | Casali et. al. Nat Genet. 2014 Mar;46(3):279-86 | Russia | Beijing  | ERR234651 | R | S | R | R | R | F | R | R |
| 2388X | Casali et. al. Nat Genet. 2014 Mar;46(3):279-86 | Russia | LAM      | ERR229934 | S | S | S | S | S | S | S | S |
| 2639V | Casali et. al. Nat Genet. 2014 Mar;46(3):279-86 | Russia | Beijing  | ERR234698 | R | R | S | S | R | R | R | U |
| 0066Y | Casali et. al. Nat Genet. 2014 Mar;46(3):279-86 | Russia | Beijing  | ERR108498 | R | R | R | R | R | R | R | R |
| 1919M | Casali et. al. Nat Genet. 2014 Mar;46(3):279-86 | Russia | Ural     | ERR144598 | R | S | S | S | R | S | S | R |
| 0355M | Casali et. al. Nat Genet. 2014 Mar;46(3):279-86 | Russia | Haarlem  | ERR133850 | S | S | S | S | S | S | S | S |
| 0450Q | Casali et. al. Nat Genet. 2014 Mar;46(3):279-86 | Russia | Beijing  | ERR067750 | R | R | R | R | R | R | R | R |
| 0218N | Casali et. al. Nat Genet. 2014 Mar;46(3):279-86 | Russia | Beijing  | ERR067584 | R | R | R | S | R | R | R | U |
| 2078K | Casali et. al. Nat Genet. 2014 Mar;46(3):279-86 | Russia | Beijing  | ERR144634 | R | R | R | S | R | R | R | S |
| 2324C | Casali et. al. Nat Genet. 2014 Mar;46(3):279-86 | Russia | LAM      | ERR228005 | S | S | S | S | S | S | S | S |
| 1191W | Casali et. al. Nat Genet. 2014 Mar;46(3):279-86 | Russia | LAM      | ERR137201 | R | S | S | S | R | S | S | S |
| 0873A | Casali et. al. Nat Genet. 2014 Mar;46(3):279-86 | Russia | Beijing  | ERR108440 | S | S | S | S | S | S | S | S |
| 2335P | Casali et. al. Nat Genet. 2014 Mar;46(3):279-86 | Russia | Beijing  | ERR228061 | R | R | R | S | R | R | R | U |
| 1858W | Casali et. al. Nat Genet. 2014 Mar;46(3):279-86 | Russia | Beijing  | ERR144574 | R | R | R | S | R | R | R | U |
| 0399K | Casali et. al. Nat Genet. 2014 Mar;46(3):279-86 | Russia | lineage4 | ERR133857 | S | S | S | S | S | S | S | S |
| 1705E | Casali et. al. Nat Genet. 2014 Mar;46(3):279-86 | Russia | Beijing  | ERR137262 | R | R | R | S | R | R | R | U |
| 1397V | Casali et. al. Nat Genet. 2014 Mar;46(3):279-86 | Russia | lineage4 | ERR137224 | S | S | S | S | S | S | S | S |
| 2625E | Casali et. al. Nat Genet. 2014 Mar;46(3):279-86 | Russia | Ural     | ERR234693 | R | S | S | S | R | S | S | S |
| 0668C | Casali et. al. Nat Genet. 2014 Mar;46(3):279-86 | Russia | Beijing  | ERR133901 | R | R | R | S | R | S | R | S |
| 2592T | Casali et. al. Nat Genet. 2014 Mar;46(3):279-86 | Russia | Beijing  | ERR234688 | R | S | R | R | R | R | R | R |
| 2049D | Casali et. al. Nat Genet. 2014 Mar;46(3):279-86 | Russia | Beijing  | ERR144625 | R | R | S | S | S | F | S | S |
| 2386V | Casali et. al. Nat Genet. 2014 Mar;46(3):279-86 | Russia | Beijing  | ERR229926 | R | R | R | S | R | R | R | S |
| 0678N | Casali et. al. Nat Genet. 2014 Mar;46(3):279-86 | Russia | Haarlem  | ERR234634 | S | S | R | S | S | U | S | S |
| 0818Q | Casali et. al. Nat Genet. 2014 Mar;46(3):279-86 | Russia | Beijing  | ERR067651 | R | R | R | S | R | R | R | U |
| 1820E | Casali et. al. Nat Genet. 2014 Mar;46(3):279-86 | Russia | Haarlem  | ERR144559 | R | S | S | S | R | S | S | S |
| 1256R | Casali et. al. Nat Genet. 2014 Mar;46(3):279-86 | Russia | Beijing  | ERR137207 | S | S | R | S | S | S | U | S |
| 1164R | Casali et. al. Nat Genet. 2014 Mar;46(3):279-86 | Russia | Delhi    | ERR137193 | S | S | S | S | S | S | S | S |
| 1268E | Casali et. al. Nat Genet. 2014 Mar;46(3):279-86 | Russia | Beijing  | ERR137208 | R | R | R | R | R | R | R | R |
| 1767X | Casali et. al. Nat Genet. 2014 Mar;46(3):279-86 | Russia | Beijing  | ERR137285 | S | S | S | S | S | S | S | S |
| 0972H | Casali et. al. Nat Genet. 2014 Mar;46(3):279-86 | Russia | Ural     | ERR133978 | S | S | S | S | S | S | S | S |
| 2371D | Casali et. al. Nat Genet. 2014 Mar;46(3):279-86 | Russia | Beijing  | ERR229949 | R | R | R | R | R | R | R | S |
| 0671F | Casali et. al. Nat Genet. 2014 Mar;46(3):279-86 | Russia | LAM      | ERR133903 | R | R | R | R | R | R | U | R |
| 2487E | Casali et. al. Nat Genet. 2014 Mar;46(3):279-86 | Russia | Beijing  | ERR229984 | R | R | R | S | R | R | R | R |
| 2312P | Casali et. al. Nat Genet. 2014 Mar;46(3):279-86 | Russia | Beijing  | ERR228028 | R | R | R | R | R | R | R | R |
| 2302D | Casali et. al. Nat Genet. 2014 Mar;46(3):279-86 | Russia | Beijing  | ERR227980 | R | S | R | S | R | S | R | S |
| 0770N | Casali et. al. Nat Genet. 2014 Mar;46(3):279-86 | Russia | Beijing  | ERR108469 | R | R | R | S | R | R | R | U |
| 2090Y | Casali et. al. Nat Genet. 2014 Mar;46(3):279-86 | Russia | Beijing  | ERR158577 | S | S | S | S | S | S | S | S |
| 0402N | Casali et. al. Nat Genet. 2014 Mar;46(3):279-86 | Russia | Beijing  | ERR067588 | R | R | S | S | R | R | R | S |
| 0904J | Casali et. al. Nat Genet. 2014 Mar;46(3):279-86 | Russia | Ural     | ERR133969 | R | S | S | S | R | S | S | U |
| 0816N | Casali et. al. Nat Genet. 2014 Mar;46(3):279-86 | Russia | Beijing  | ERR067649 | R | R | S | S | R | S | R | S |
| 0835J | Casali et. al. Nat Genet. 2014 Mar;46(3):279-86 | Russia | Beijing  | ERR067656 | R | R | S | S | R | R | R | U |
| 2236G | Casali et. al. Nat Genet. 2014 Mar;46(3):279-86 | Russia | S-type   | ERR228025 | R | R | S | S | R | F | S | U |
| 2219N | Casali et. al. Nat Genet. 2014 Mar;46(3):279-86 | Russia | Ural     | ERR227985 | R | R | R | R | R | R | R | R |
| 2052G | Casali et. al. Nat Genet. 2014 Mar;46(3):279-86 | Russia | Beijing  | ERR144628 | R | R | R | S | R | R | R | U |
| 2177S | Casali et. al. Nat Genet. 2014 Mar;46(3):279-86 | Russia | lineage4 | ERR228023 | S | S | S | S | S | S | S | S |
| 1342K | Casali et. al. Nat Genet. 2014 Mar;46(3):279-86 | Russia | Beijing  | ERR137215 | R | R | S | S | S | S | S | S |
| 1361F | Casali et. al. Nat Genet. 2014 Mar;46(3):279-86 | Russia | Beijing  | ERR234603 | S | S | S | S | S | S | S | S |
| 1772C | Casali et. al. Nat Genet. 2014 Mar;46(3):279-86 | Russia | LAM      | ERR144544 | S | S | S | S | S | S | U | S |
| 0696H | Casali et. al. Nat Genet. 2014 Mar;46(3):279-86 | Russia | Beijing  | ERR133906 | R | R | R | R | R | R | R | U |
| 0183A | Casali et. al. Nat Genet. 2014 Mar;46(3):279-86 | Russia | Beijing  | ERR234645 | R | R | R | S | R | S | R | S |
| 1455H | Casali et. al. Nat Genet. 2014 Mar;46(3):279-86 | Russia | Ural     | ERR137233 | R | S | R | S | R | S | R | S |
| 0075H | Casali et. al. Nat Genet. 2014 Mar;46(3):279-86 | Russia | Beijing  | ERR117469 | R | S | S | S | R | S | S | S |
| 0458Z | Casali et. al. Nat Genet. 2014 Mar;46(3):279-86 | Russia | Beijing  | ERR133866 | R | R | S | S | R | R | R | U |
| 0507C | Casali et. al. Nat Genet. 2014 Mar;46(3):279-86 | Russia | Ural     | ERR067728 | R | R | S | S | R | R | R | F |
| 0725P | Casali et. al. Nat Genet. 2014 Mar;46(3):279-86 | Russia | Beijing  | ERR133915 | R | R | S | R | R | R | R | U |
| 0590S | Casali et. al. Nat Genet. 2014 Mar;46(3):279-86 | Russia | Beijing  | ERR133889 | R | R | R | S | R | R | R | U |
| 1507P | Casali et. al. Nat Genet. 2014 Mar;46(3):279-86 | Russia | LAM      | ERR227990 | R | S | S | S | R | S | U | R |
| 2440D | Casali et. al. Nat Genet. 2014 Mar;46(3):279-86 | Russia | lineage4 | ERR229967 | R | S | S | S | R | S | S | S |
| 1409H | Casali et. al. Nat Genet. 2014 Mar;46(3):279-86 | Russia | Beijing  | ERR137225 | R | R | S | R | R | R | R | F |
| 1709J | Casali et. al. Nat Genet. 2014 Mar;46(3):279-86 | Russia | Beijing  | ERR137264 | R | R | S | S | R | R | R | R |
| 0650H | Casali et. al. Nat Genet. 2014 Mar;46(3):279-86 | Russia | Beijing  | ERR234649 | R | R | S | R | R | R | R | R |
| 2182Y | Casali et. al. Nat Genet. 2014 Mar;46(3):279-86 | Russia | lineage4 | ERR228047 | S | S | S | S | S | S | S | S |
| 0945D | Casali et. al. Nat Genet. 2014 Mar;46(3):279-86 | Russia | Ural     | ERR067645 | R | R | S | S | R | S | U | S |
| 0465G | Casali et. al. Nat Genet. 2014 Mar;46(3):279-86 | Russia | Beijing  | ERR067631 | R | R | S | S | R | R | R | S |
| 0530C | Casali et. al. Nat Genet. 2014 Mar;46(3):279-86 | Russia | Beijing  | ERR133879 | R | R | R | R | R | R | R | R |
| 2008J | Casali et. al. Nat Genet. 2014 Mar;46(3):279-86 | Russia | Beijing  | ERR144609 | R | S | S | S | U | S | S | S |
| 1518B | Casali et. al. Nat Genet. 2014 Mar;46(3):279-86 | Russia | Beijing  | ERR137241 | S | S | S | S | S | S | S | S |
| 0351H | Casali et. al. Nat Genet. 2014 Mar;46(3):279-86 | Russia | LAM      | ERR067693 | S | S | S | S | S | S | S | S |
| 1186Q | Casali et. al. Nat Genet. 2014 Mar;46(3):279-86 | Russia | Beijing  | ERR137198 | R | S | S | S | R | S | S | S |
| 2171L | Casali et. al. Nat Genet. 2014 Mar;46(3):279-86 | Russia | Beijing  | ERR227999 | S | S | S | S | S | S | S | S |
| 0026E | Casali et. al. Nat Genet. 2014 Mar;46(3):279-86 | Russia | Beijing  | ERR108514 | R | R | R | S | R | R | U | U |
| 2342X | Casali et. al. Nat Genet. 2014 Mar;46(3):279-86 | Russia | Beijing  | ERR229955 | R | R | R | S | R | R | R | S |
| 0392C | Casali et. al. Nat Genet. 2014 Mar;46(3):279-86 | Russia | Beijing  | ERR234559 | S | S | S | S | S | S | S | S |
| 1359D | Casali et. al. Nat Genet. 2014 Mar;46(3):279-86 | Russia | Beijing  | ERR137218 | R | R | R | S | R | R | R | S |
| 2533E | Casali et. al. Nat Genet. 2014 Mar;46(3):279-86 | Russia | Beijing  | ERR234658 | R | R | R | R | R | R | R | S |
| 2315S | Casali et. al. Nat Genet. 2014 Mar;46(3):279-86 | Russia | Haarlem  | ERR228044 | R | S | S | S | R | S | S | S |
| 1551M | Casali et. al. Nat Genet. 2014 Mar;46(3):279-86 | Russia | Ural     | ERR137245 | S | S | S | S | S | S | S | S |
| 1012B | Casali et. al. Nat Genet. 2014 Mar;46(3):279-86 | Russia | Ural     | ERR108485 | R | R | S | S | R | S | S | S |
| 2494M | Casali et. al. Nat Genet. 2014 Mar;46(3):279-86 | Russia | Beijing  | ERR229945 | S | S | S | S | S | S | S | S |
| 0390A | Casali et. al. Nat Genet. 2014 Mar;46(3):279-86 | Russia | Beijing  | ERR067724 | R | R | S | R | R | R | R | S |
| 0834H | Casali et. al. Nat Genet. 2014 Mar;46(3):279-86 | Russia | Beijing  | ERR067655 | R | R | S | S | S | S | S | U |
| 2568S | Casali et. al. Nat Genet. 2014 Mar;46(3):279-86 | Russia | Beijing  | ERR234672 | R | R | R | R | R | R | R | U |
| 2358P | Casali et. al. Nat Genet. 2014 Mar;46(3):279-86 | Russia | lineage4 | ERR229956 | S | S | S | S | S | S | S | S |
| 1465T | Casali et. al. Nat Genet. 2014 Mar;46(3):279-86 | Russia | Beijing  | ERR137235 | S | S | S | S | S | S | S | S |
| 1832S | Casali et. al. Nat Genet. 2014 Mar;46(3):279-86 | Russia | Ural     | ERR144565 | R | S | R | S | R | S | S | S |
| 1780L | Casali et. al. Nat Genet. 2014 Mar;46(3):279-86 | Russia | LAM      | ERR144547 | S | S | S | S | U | S | S | S |
| 0992E | Casali et. al. Nat Genet. 2014 Mar;46(3):279-86 | Russia | LAM      | ERR108483 | S | S | S | S | U | S | S | S |
| 2209C | Casali et. al. Nat Genet. 2014 Mar;46(3):279-86 | Russia | Beijing  | ERR228040 | R | S | S | S | R | S | S | S |
| 1137M | Casali et. al. Nat Genet. 2014 Mar;46(3):279-86 | Russia | Ural     | ERR108497 | S | S | S | S | S | S | S | S |
| 1782N | Casali et. al. Nat Genet. 2014 Mar;46(3):279-86 | Russia | Beijing  | ERR144548 | R | R | S | S | R | R | R | U |
| 1102Z | Casali et. al. Nat Genet. 2014 Mar;46(3):279-86 | Russia | lineage4 | ERR137191 | S | S | S | S | S | S | S | S |
| 0020Y | Casali et. al. Nat Genet. 2014 Mar;46(3):279-86 | Russia | Beijing  | ERR108462 | R | R | R | R | R | R | R | R |
| 0782B | Casali et. al. Nat Genet. 2014 Mar;46(3):279-86 | Russia | lineage4 | ERR133934 | S | S | S | S | S | S | S | S |
| 0527Z | Casali et. al. Nat Genet. 2014 Mar;46(3):279-86 | Russia | LAM      | ERR133876 | S | S | S | S | S | S | S | S |
| 0817P | Casali et. al. Nat Genet. 2014 Mar;46(3):279-86 | Russia | Beijing  | ERR067650 | R | R | S | S | R | R | R | U |
| 0268S | Casali et. al. Nat Genet. 2014 Mar;46(3):279-86 | Russia | lineage4 | ERR133829 | S | S | S | S | S | S | S | S |
| 2070B | Casali et. al. Nat Genet. 2014 Mar;46(3):279-86 | Russia | Beijing  | ERR144630 | S | S | S | S | S | S | S | S |
| 1391N | Casali et. al. Nat Genet. 2014 Mar;46(3):279-86 | Russia | Beijing  | ERR137222 | R | R | S | S | R | R | R | U |
| 2150N | Casali et. al. Nat Genet. 2014 Mar;46(3):279-86 | Russia | Beijing  | ERR158596 | R | R | S | S | R | R | R | R |
| 1739R | Casali et. al. Nat Genet. 2014 Mar;46(3):279-86 | Russia | Beijing  | ERR137275 | R | R | R | R | R | R | R | R |
| 1657C | Casali et. al. Nat Genet. 2014 Mar;46(3):279-86 | Russia | Beijing  | ERR137255 | R | R | S | R | R | R | R | R |
| 2283H | Casali et. al. Nat Genet. 2014 Mar;46(3):279-86 | Russia | Beijing  | ERR228003 | R | R | S | S | R | R | R | S |
| 2170K | Casali et. al. Nat Genet. 2014 Mar;46(3):279-86 | Russia | Ural     | ERR227991 | S | S | S | S | S | S | S | S |
| 0124L | Casali et. al. Nat Genet. 2014 Mar;46(3):279-86 | Russia | Ural     | ERR133804 | R | S | S | S | R | S | S | S |
| 2317V | Casali et. al. Nat Genet. 2014 Mar;46(3):279-86 | Russia | Beijing  | ERR228060 | S | S | S | S | S | S | U | S |
| 1451D | Casali et. al. Nat Genet. 2014 Mar;46(3):279-86 | Russia | Beijing  | ERR137232 | S | S | S | S | S | S | S | S |
| 0366Z | Casali et. al. Nat Genet. 2014 Mar;46(3):279-86 | Russia | Beijing  | ERR234638 | S | S | S | S | S | S | S | S |
| 0555E | Casali et. al. Nat Genet. 2014 Mar;46(3):279-86 | Russia | lineage4 | ERR067732 | R | S | R | R | F | F | S | F |

|       |                                                 |        |          |           |   |   |   |   |   |   |   |   |
|-------|-------------------------------------------------|--------|----------|-----------|---|---|---|---|---|---|---|---|
| 0345B | Casali et. al. Nat Genet. 2014 Mar;46(3):279-86 | Russia | Beijing  | ERR067587 | R | R | S | S | R | R | R | U |
| 2491J | Casali et. al. Nat Genet. 2014 Mar;46(3):279-86 | Russia | Beijing  | ERR229921 | R | R | R | S | R | R | R | U |
| 0016T | Casali et. al. Nat Genet. 2014 Mar;46(3):279-86 | Russia | lineage4 | ERR108460 | S | S | S | S | S | S | S | S |
| 1542C | Casali et. al. Nat Genet. 2014 Mar;46(3):279-86 | Russia | Beijing  | ERR108452 | S | S | S | S | S | F | S | S |
| 1852P | Casali et. al. Nat Genet. 2014 Mar;46(3):279-86 | Russia | Beijing  | ERR144571 | R | R | R | R | R | R | R | S |
| 0667B | Casali et. al. Nat Genet. 2014 Mar;46(3):279-86 | Russia | Beijing  | ERR133900 | R | R | R | R | R | R | R | S |
| 0404Q | Casali et. al. Nat Genet. 2014 Mar;46(3):279-86 | Russia | Beijing  | ERR067590 | R | R | R | R | R | R | R | R |
| 2408T | Casali et. al. Nat Genet. 2014 Mar;46(3):279-86 | Russia | Ural     | ERR229919 | S | S | S | S | S | S | S | S |
| 0552B | Casali et. al. Nat Genet. 2014 Mar;46(3):279-86 | Russia | Beijing  | ERR234624 | R | S | S | S | R | S | S | S |
| 0290R | Casali et. al. Nat Genet. 2014 Mar;46(3):279-86 | Russia | Ural     | ERR133838 | R | S | S | S | R | S | U | S |
| 0385V | Casali et. al. Nat Genet. 2014 Mar;46(3):279-86 | Russia | Beijing  | ERR234646 | R | R | S | S | R | R | R | S |
| 0433X | Casali et. al. Nat Genet. 2014 Mar;46(3):279-86 | Russia | Beijing  | ERR133863 | S | S | S | S | S | S | S | S |
| 1011A | Casali et. al. Nat Genet. 2014 Mar;46(3):279-86 | Russia | Ural     | ERR133981 | R | R | R | S | U | R | R | S |
| 2340V | Casali et. al. Nat Genet. 2014 Mar;46(3):279-86 | Russia | Beijing  | ERR229939 | S | S | S | S | S | S | S | S |
| 0512H | Casali et. al. Nat Genet. 2014 Mar;46(3):279-86 | Russia | Beijing  | ERR067762 | R | R | S | S | R | R | R | U |
| 0906L | Casali et. al. Nat Genet. 2014 Mar;46(3):279-86 | Russia | Beijing  | ERR133970 | R | S | S | R | R | R | R | U |
| 1680C | Casali et. al. Nat Genet. 2014 Mar;46(3):279-86 | Russia | Haarlem  | ERR137256 | S | S | S | S | S | S | S | S |
| 0042X | Casali et. al. Nat Genet. 2014 Mar;46(3):279-86 | Russia | Beijing  | ERR117449 | S | S | S | S | S | S | U | S |
| 0700M | Casali et. al. Nat Genet. 2014 Mar;46(3):279-86 | Russia | Beijing  | ERR133907 | R | R | R | S | R | R | R | S |
| 2248W | Casali et. al. Nat Genet. 2014 Mar;46(3):279-86 | Russia | lineage4 | ERR228065 | S | S | S | S | S | S | S | S |
| 2591S | Casali et. al. Nat Genet. 2014 Mar;46(3):279-86 | Russia | LAM      | ERR234687 | S | S | S | S | S | S | S | S |
| 1871K | Casali et. al. Nat Genet. 2014 Mar;46(3):279-86 | Russia | Beijing  | ERR144582 | S | S | S | S | S | S | U | S |
| 1741T | Casali et. al. Nat Genet. 2014 Mar;46(3):279-86 | Russia | Beijing  | ERR137277 | R | R | R | S | R | R | R | U |
| 2499S | Casali et. al. Nat Genet. 2014 Mar;46(3):279-86 | Russia | Beijing  | ERR229977 | S | S | S | S | S | S | S | S |
| 0273Y | Casali et. al. Nat Genet. 2014 Mar;46(3):279-86 | Russia | Beijing  | ERR133831 | R | R | R | S | R | R | R | U |
| 1870J | Casali et. al. Nat Genet. 2014 Mar;46(3):279-86 | Russia | Beijing  | ERR144581 | R | R | S | R | R | R | U | S |
| 0111X | Casali et. al. Nat Genet. 2014 Mar;46(3):279-86 | Russia | Beijing  | ERR234637 | R | R | R | R | R | R | R | U |
| 2247T | Casali et. al. Nat Genet. 2014 Mar;46(3):279-86 | Russia | lineage4 | ERR228057 | S | S | S | S | S | S | S | S |
| 1650V | Casali et. al. Nat Genet. 2014 Mar;46(3):279-86 | Russia | Beijing  | ERR108506 | S | S | S | R | S | S | U | R |
| 0373G | Casali et. al. Nat Genet. 2014 Mar;46(3):279-86 | Russia | Haarlem  | ERR067697 | R | R | S | R | R | R | R | R |
| 0430T | Casali et. al. Nat Genet. 2014 Mar;46(3):279-86 | Russia | lineage4 | ERR067726 | S | S | S | S | S | S | S | S |
| 1126A | Casali et. al. Nat Genet. 2014 Mar;46(3):279-86 | Russia | Beijing  | ERR108493 | R | R | R | S | R | R | R | U |
| 0653L | Casali et. al. Nat Genet. 2014 Mar;46(3):279-86 | Russia | Beijing  | ERR133899 | R | R | R | S | R | R | R | R |
| 0283J | Casali et. al. Nat Genet. 2014 Mar;46(3):279-86 | Russia | Beijing  | ERR234574 | R | R | S | S | R | R | R | U |
| 0784D | Casali et. al. Nat Genet. 2014 Mar;46(3):279-86 | Russia | Beijing  | ERR133935 | R | R | R | S | R | R | R | S |
| 0960V | Casali et. al. Nat Genet. 2014 Mar;46(3):279-86 | Russia | Beijing  | ERR067635 | R | R | S | S | R | R | R | U |
| 1691P | Casali et. al. Nat Genet. 2014 Mar;46(3):279-86 | Russia | LAM      | ERR137258 | S | S | S | S | S | S | S | S |
| 1373T | Casali et. al. Nat Genet. 2014 Mar;46(3):279-86 | Russia | lineage4 | ERR234627 | R | R | S | S | R | R | R | S |
| 1029V | Casali et. al. Nat Genet. 2014 Mar;46(3):279-86 | Russia | Beijing  | ERR108488 | R | R | S | R | R | R | R | S |
| 2511F | Casali et. al. Nat Genet. 2014 Mar;46(3):279-86 | Russia | Haarlem  | ERR229954 | S | S | S | S | S | S | S | S |
| 1346P | Casali et. al. Nat Genet. 2014 Mar;46(3):279-86 | Russia | Beijing  | ERR117470 | R | R | R | S | R | R | R | U |
| 1879T | Casali et. al. Nat Genet. 2014 Mar;46(3):279-86 | Russia | lineage4 | ERR144585 | S | S | S | S | S | S | S | S |
| 2081N | Casali et. al. Nat Genet. 2014 Mar;46(3):279-86 | Russia | Beijing  | ERR158569 | S | R | S | S | S | R | S | S |
| 0137A | Casali et. al. Nat Genet. 2014 Mar;46(3):279-86 | Russia | LAM      | ERR133811 | S | S | S | S | S | S | S | S |
| 0403P | Casali et. al. Nat Genet. 2014 Mar;46(3):279-86 | Russia | Beijing  | ERR067589 | S | S | S | S | S | R | S | S |
| 0060R | Casali et. al. Nat Genet. 2014 Mar;46(3):279-86 | Russia | Beijing  | ERR234557 | R | R | R | S | S | S | U | S |
| 2357N | Casali et. al. Nat Genet. 2014 Mar;46(3):279-86 | Russia | lineage4 | ERR229948 | S | S | S | S | S | S | S | S |
| 0541P | Casali et. al. Nat Genet. 2014 Mar;46(3):279-86 | Russia | Beijing  | ERR234608 | R | R | S | S | R | R | R | R |
| 0779Y | Casali et. al. Nat Genet. 2014 Mar;46(3):279-86 | Russia | Beijing  | ERR108470 | S | S | S | S | S | S | S | S |
| 0397H | Casali et. al. Nat Genet. 2014 Mar;46(3):279-86 | Russia | Beijing  | ERR133856 | R | S | S | S | R | R | S | S |
| 1370Q | Casali et. al. Nat Genet. 2014 Mar;46(3):279-86 | Russia | Beijing  | ERR234619 | S | S | S | S | S | S | S | S |
| 1522F | Casali et. al. Nat Genet. 2014 Mar;46(3):279-86 | Russia | Beijing  | ERR137243 | R | R | R | R | R | R | R | R |
| 2493L | Casali et. al. Nat Genet. 2014 Mar;46(3):279-86 | Russia | lineage4 | ERR229937 | S | S | S | S | S | S | U | S |
| 1475E | Casali et. al. Nat Genet. 2014 Mar;46(3):279-86 | Russia | Beijing  | ERR067711 | R | R | R | S | R | R | R | U |
| 0466H | Casali et. al. Nat Genet. 2014 Mar;46(3):279-86 | Russia | Beijing  | ERR234639 | R | R | R | R | R | R | R | F |
| 1723Z | Casali et. al. Nat Genet. 2014 Mar;46(3):279-86 | Russia | Beijing  | ERR117468 | R | R | S | S | R | R | R | U |
| 2367J | Casali et. al. Nat Genet. 2014 Mar;46(3):279-86 | Russia | LAM      | ERR229973 | S | S | S | S | S | S | S | S |
| 0069B | Casali et. al. Nat Genet. 2014 Mar;46(3):279-86 | Russia | Beijing  | ERR108500 | R | R | S | S | R | R | R | S |
| 1072R | Casali et. al. Nat Genet. 2014 Mar;46(3):279-86 | Russia | Ural     | ERR108429 | R | S | S | S | R | S | S | S |
| 1127B | Casali et. al. Nat Genet. 2014 Mar;46(3):279-86 | Russia | Beijing  | ERR108494 | R | R | R | R | R | F | F | F |
| 2379M | Casali et. al. Nat Genet. 2014 Mar;46(3):279-86 | Russia | LAM      | ERR229989 | R | S | S | S | R | S | U | S |
| 0890T | Casali et. al. Nat Genet. 2014 Mar;46(3):279-86 | Russia | lineage4 | ERR108442 | S | S | S | S | S | S | S | S |
| 0157X | Casali et. al. Nat Genet. 2014 Mar;46(3):279-86 | Russia | Beijing  | ERR067718 | R | R | R | S | R | R | R | U |
| 2162B | Casali et. al. Nat Genet. 2014 Mar;46(3):279-86 | Russia | Beijing  | ERR228062 | R | R | R | S | R | R | R | U |
| 1552N | Casali et. al. Nat Genet. 2014 Mar;46(3):279-86 | Russia | Beijing  | ERR137246 | R | R | R | R | R | R | R | R |
| 1735M | Casali et. al. Nat Genet. 2014 Mar;46(3):279-86 | Russia | Beijing  | ERR137271 | R | R | R | R | R | R | F | F |
| 1586A | Casali et. al. Nat Genet. 2014 Mar;46(3):279-86 | Russia | Beijing  | ERR137248 | R | R | S | R | R | R | R | R |
| 0536J | Casali et. al. Nat Genet. 2014 Mar;46(3):279-86 | Russia | Haarlem  | ERR133883 | S | S | S | S | S | S | S | S |
| 1712M | Casali et. al. Nat Genet. 2014 Mar;46(3):279-86 | Russia | Beijing  | ERR137267 | R | S | S | S | R | S | R | S |
| 2360R | Casali et. al. Nat Genet. 2014 Mar;46(3):279-86 | Russia | Beijing  | ERR229964 | R | S | S | S | R | R | S | S |
| 1613E | Casali et. al. Nat Genet. 2014 Mar;46(3):279-86 | Russia | lineage4 | ERR067682 | S | S | S | S | S | S | S | S |
| 1594J | Casali et. al. Nat Genet. 2014 Mar;46(3):279-86 | Russia | Beijing  | ERR108434 | S | S | S | S | S | S | S | S |
| 0030J | Casali et. al. Nat Genet. 2014 Mar;46(3):279-86 | Russia | Haarlem  | ERR067616 | S | S | S | S | S | S | S | S |
| 0702P | Casali et. al. Nat Genet. 2014 Mar;46(3):279-86 | Russia | lineage4 | ERR133909 | R | R | S | R | R | S | S | S |
| 0236H | Casali et. al. Nat Genet. 2014 Mar;46(3):279-86 | Russia | Ural     | ERR133823 | R | R | R | S | R | S | S | S |
| 0473Q | Casali et. al. Nat Genet. 2014 Mar;46(3):279-86 | Russia | Ural     | ERR067753 | S | S | S | S | S | S | S | S |
| 1854R | Casali et. al. Nat Genet. 2014 Mar;46(3):279-86 | Russia | Beijing  | ERR144573 | R | R | R | S | R | R | R | R |
| 0080N | Casali et. al. Nat Genet. 2014 Mar;46(3):279-86 | Russia | Beijing  | ERR234573 | R | R | S | S | R | R | R | S |
| 1903V | Casali et. al. Nat Genet. 2014 Mar;46(3):279-86 | Russia | Beijing  | ERR144594 | R | S | S | S | R | S | S | S |
| 0285L | Casali et. al. Nat Genet. 2014 Mar;46(3):279-86 | Russia | Beijing  | ERR067723 | R | R | S | S | R | R | R | S |
| 0126N | Casali et. al. Nat Genet. 2014 Mar;46(3):279-86 | Russia | Beijing  | ERR133806 | R | R | S | S | R | R | R | U |
| 0616W | Casali et. al. Nat Genet. 2014 Mar;46(3):279-86 | Russia | Beijing  | ERR133896 | R | R | S | S | R | R | R | R |
| 2187D | Casali et. al. Nat Genet. 2014 Mar;46(3):279-86 | Russia | lineage4 | ERR228063 | S | S | S | S | S | S | S | S |
| 0278D | Casali et. al. Nat Genet. 2014 Mar;46(3):279-86 | Russia | Ural     | ERR133834 | R | R | S | S | R | R | S | S |
| 0378M | Casali et. al. Nat Genet. 2014 Mar;46(3):279-86 | Russia | lineage4 | ERR067736 | S | S | S | S | S | S | S | S |
| 1269F | Casali et. al. Nat Genet. 2014 Mar;46(3):279-86 | Russia | LAM      | ERR137209 | R | R | S | R | R | R | U | R |
| 0902G | Casali et. al. Nat Genet. 2014 Mar;46(3):279-86 | Russia | Ural     | ERR133967 | S | S | S | S | U | S | S | S |
| 0358Q | Casali et. al. Nat Genet. 2014 Mar;46(3):279-86 | Russia | Beijing  | ERR158616 | R | R | R | R | R | R | R | R |
| 1731H | Casali et. al. Nat Genet. 2014 Mar;46(3):279-86 | Russia | Beijing  | ERR137269 | R | R | S | S | R | R | R | U |
| 1079Z | Casali et. al. Nat Genet. 2014 Mar;46(3):279-86 | Russia | LAM      | ERR108446 | S | S | S | S | U | S | S | S |
| 0802Y | Casali et. al. Nat Genet. 2014 Mar;46(3):279-86 | Russia | Beijing  | ERR133945 | R | S | S | R | R | R | R | F |
| 1073S | Casali et. al. Nat Genet. 2014 Mar;46(3):279-86 | Russia | Beijing  | ERR108443 | R | R | R | R | R | R | R | S |
| 2215J | Casali et. al. Nat Genet. 2014 Mar;46(3):279-86 | Russia | Beijing  | ERR228064 | R | R | S | S | R | R | R | U |
| 1833T | Casali et. al. Nat Genet. 2014 Mar;46(3):279-86 | Russia | Beijing  | ERR144566 | R | R | R | S | R | R | S | R |
| 2392B | Casali et. al. Nat Genet. 2014 Mar;46(3):279-86 | Russia | Haarlem  | ERR229958 | S | S | S | S | S | S | S | S |
| 2441E | Casali et. al. Nat Genet. 2014 Mar;46(3):279-86 | Russia | Beijing  | ERR229975 | S | S | S | S | S | S | S | S |
| 1457K | Casali et. al. Nat Genet. 2014 Mar;46(3):279-86 | Russia | Beijing  | ERR137234 | R | R | R | S | R | R | R | R |
| 0939X | Casali et. al. Nat Genet. 2014 Mar;46(3):279-86 | Russia | lineage4 | ERR067640 | S | S | S | S | U | S | S | S |
| 2195M | Casali et. al. Nat Genet. 2014 Mar;46(3):279-86 | Russia | Beijing  | ERR227976 | R | R | S | S | R | R | U | S |
| 2050E | Casali et. al. Nat Genet. 2014 Mar;46(3):279-86 | Russia | Beijing  | ERR144626 | S | S | S | S | S | S | S | S |
| 2276A | Casali et. al. Nat Genet. 2014 Mar;46(3):279-86 | Russia | Ural     | ERR228058 | R | S | S | S | R | S | U | S |
| 1233R | Casali et. al. Nat Genet. 2014 Mar;46(3):279-86 | Russia | Beijing  | ERR137204 | R | R | R | R | R | R | R | U |
| 2347C | Casali et. al. Nat Genet. 2014 Mar;46(3):279-86 | Russia | Haarlem  | ERR229987 | S | S | S | S | S | S | S | S |
| 1742V | Casali et. al. Nat Genet. 2014 Mar;46(3):279-86 | Russia | Beijing  | ERR137278 | S | S | S | S | S | R | S | S |
| 2257E | Casali et. al. Nat Genet. 2014 Mar;46(3):279-86 | Russia | Beijing  | ERR228010 | S | S | S | S | S | S | U | S |
| 0406S | Casali et. al. Nat Genet. 2014 Mar;46(3):279-86 | Russia | Beijing  | ERR067742 | R | R | S | S | R | R | R | U |
| 0348E | Casali et. al. Nat Genet. 2014 Mar;46(3):279-86 | Russia | Beijing  | ERR067692 | R | R | R | S | R | R | R | S |
| 0175R | Casali et. al. Nat Genet. 2014 Mar;46(3):279-86 | Russia | Beijing  | ERR067578 | R | R | S | R | R | R | R | U |
| 0570W | Casali et. al. Nat Genet. 2014 Mar;46(3):279-86 | Russia | Beijing  | ERR133886 | R | R | S | S |   |   |   |   |



|       |                                                 |        |          |           |     |   |   |   |   |   |   |   |
|-------|-------------------------------------------------|--------|----------|-----------|-----|---|---|---|---|---|---|---|
| 05675 | Casali et. al. Nat Genet. 2014 Mar;46(3):279-86 | Russia | lineage4 | ERR067763 | S   | S | S | S | S | S | S | S |
| 0338T | Casali et. al. Nat Genet. 2014 Mar;46(3):279-86 | Russia | Beijing  | ERR234622 | R   | R | R | R | R | R | R | U |
| 1737P | Casali et. al. Nat Genet. 2014 Mar;46(3):279-86 | Russia | Beijing  | ERR137273 | R   | R | S | S | R | R | R | S |
| 2370C | Casali et. al. Nat Genet. 2014 Mar;46(3):279-86 | Russia | Haarlem  | ERR229941 | S   | S | S | S | S | S | S | S |
| 0611Q | Casali et. al. Nat Genet. 2014 Mar;46(3):279-86 | Russia | Beijing  | ERR067595 | S   | S | S | S | S | S | S | S |
| 1821F | Casali et. al. Nat Genet. 2014 Mar;46(3):279-86 | Russia | Beijing  | ERR144560 | R   | R | R | R | R | R | R | R |
| 0138B | Casali et. al. Nat Genet. 2014 Mar;46(3):279-86 | Russia | Ural     | ERR133812 | R   | S | S | S | R | R | U | S |
| 1182L | Casali et. al. Nat Genet. 2014 Mar;46(3):279-86 | Russia | lineage4 | ERR137197 | R   | S | R | S | S | S | S | S |
| 0846W | Casali et. al. Nat Genet. 2014 Mar;46(3):279-86 | Russia | Beijing  | ERR067665 | R   | R | R | R | R | R | R | U |
| 0101L | Casali et. al. Nat Genet. 2014 Mar;46(3):279-86 | Russia | LAM      | ERR067601 | S   | S | S | S | S | S | S | S |
| 2027E | Casali et. al. Nat Genet. 2014 Mar;46(3):279-86 | Russia | Haarlem  | ERR144618 | R   | S | S | S | F | S | S | S |
| 2634P | Casali et. al. Nat Genet. 2014 Mar;46(3):279-86 | Russia | lineage4 | ERR234696 | R   | S | S | R | R | S | S | S |
| 1066K | Casali et. al. Nat Genet. 2014 Mar;46(3):279-86 | Russia | Beijing  | ERR108426 | R   | R | R | S | R | R | R | S |
| 1955B | Casali et. al. Nat Genet. 2014 Mar;46(3):279-86 | Russia | Ural     | ERR144604 | R   | S | S | S | R | S | S | S |
| 0842R | Casali et. al. Nat Genet. 2014 Mar;46(3):279-86 | Russia | Ural     | ERR067661 | R   | S | S | S | R | S | R | U |
| 1271H | Casali et. al. Nat Genet. 2014 Mar;46(3):279-86 | Russia | Beijing  | ERR137210 | R   | R | S | S | R | S | R | S |
| 1532R | Casali et. al. Nat Genet. 2014 Mar;46(3):279-86 | Russia | Beijing  | ERR228006 | R   | R | S | R | R | R | R | R |
| 2015R | Casali et. al. Nat Genet. 2014 Mar;46(3):279-86 | Russia | Beijing  | ERR144614 | S   | S | S | S | S | S | S | S |
| 1189T | Casali et. al. Nat Genet. 2014 Mar;46(3):279-86 | Russia | LAM      | ERR137200 | S   | S | S | S | S | S | S | S |
| 1324Q | Casali et. al. Nat Genet. 2014 Mar;46(3):279-86 | Russia | lineage4 | ERR108504 | S   | S | R | S | S | S | S | S |
| 0647E | Casali et. al. Nat Genet. 2014 Mar;46(3):279-86 | Russia | Beijing  | ERR234633 | R   | R | R | S | R | R | R | U |
| 1048Q | Casali et. al. Nat Genet. 2014 Mar;46(3):279-86 | Russia | Beijing  | ERR133984 | R   | R | R | R | R | R | R | R |
| 1469Y | Casali et. al. Nat Genet. 2014 Mar;46(3):279-86 | Russia | Beijing  | ERR067705 | R   | R | S | R | R | R | S | F |
| 0987Z | Casali et. al. Nat Genet. 2014 Mar;46(3):279-86 | Russia | Beijing  | ERR108479 | S   | S | S | S | S | S | S | S |
| 2163C | Casali et. al. Nat Genet. 2014 Mar;46(3):279-86 | Russia | Beijing  | ERR227975 | R   | R | S | S | R | R | S | S |
| 2345A | Casali et. al. Nat Genet. 2014 Mar;46(3):279-86 | Russia | Ural     | ERR229979 | S   | S | S | S | S | S | S | S |
| 2631L | Casali et. al. Nat Genet. 2014 Mar;46(3):279-86 | Russia | Delhi    | ERR234695 | S   | S | S | S | S | S | S | S |
| 1738Q | Casali et. al. Nat Genet. 2014 Mar;46(3):279-86 | Russia | Ural     | ERR137274 | R   | R | S | S | R | R | S | S |
| 0596Z | Casali et. al. Nat Genet. 2014 Mar;46(3):279-86 | Russia | lineage4 | ERR133893 | S   | S | S | S | S | S | S | S |
| 0131T | Casali et. al. Nat Genet. 2014 Mar;46(3):279-86 | Russia | lineage4 | ERR133808 | S   | S | S | S | S | S | S | S |
| 2267Q | Casali et. al. Nat Genet. 2014 Mar;46(3):279-86 | Russia | lineage4 | ERR228026 | R   | S | S | S | R | S | S | S |
| 2023A | Casali et. al. Nat Genet. 2014 Mar;46(3):279-86 | Russia | Beijing  | ERR144616 | S   | S | S | S | S | S | S | S |
| 0666A | Casali et. al. Nat Genet. 2014 Mar;46(3):279-86 | Russia | Beijing  | ERR234618 | R   | R | R | S | R | R | R | U |
| 0506B | Casali et. al. Nat Genet. 2014 Mar;46(3):279-86 | Russia | Beijing  | ERR133871 | S   | S | S | S | S | S | U | S |
| 1188S | Casali et. al. Nat Genet. 2014 Mar;46(3):279-86 | Russia | lineage4 | ERR137199 | R   | S | S | S | F | S | F | S |
| 1509R | Casali et. al. Nat Genet. 2014 Mar;46(3):279-86 | Russia | Beijing  | ERR117463 | R   | R | S | S | R | R | U | S |
| 2527Y | Casali et. al. Nat Genet. 2014 Mar;46(3):279-86 | Russia | Beijing  | ERR234655 | R   | S | S | S | R | S | S | S |
| 2361S | Casali et. al. Nat Genet. 2014 Mar;46(3):279-86 | Russia | Ural     | ERR229972 | S   | S | S | S | S | S | S | S |
| 2088W | Casali et. al. Nat Genet. 2014 Mar;46(3):279-86 | Russia | Beijing  | ERR158575 | S   | S | S | S | S | S | S | S |
| 1653Y | Casali et. al. Nat Genet. 2014 Mar;46(3):279-86 | Russia | Beijing  | ERR137253 | S   | S | S | S | S | S | S | S |
| 2039S | Casali et. al. Nat Genet. 2014 Mar;46(3):279-86 | Russia | Beijing  | ERR144623 | R   | R | S | S | R | R | R | R |
| 1071Q | Casali et. al. Nat Genet. 2014 Mar;46(3):279-86 | Russia | Beijing  | ERR108428 | R   | R | R | S | R | R | R | R |
| 0518P | Casali et. al. Nat Genet. 2014 Mar;46(3):279-86 | Russia | Beijing  | ERR133873 | R   | R | S | R | R | R | R | R |
| 1503K | Casali et. al. Nat Genet. 2014 Mar;46(3):279-86 | Russia | lineage4 | ERR137238 | S   | S | S | S | S | S | S | S |
| 0434Y | Casali et. al. Nat Genet. 2014 Mar;46(3):279-86 | Russia | lineage4 | ERR133864 | S   | S | S | S | S | S | S | S |
| 1765V | Casali et. al. Nat Genet. 2014 Mar;46(3):279-86 | Russia | Beijing  | ERR137283 | R   | R | S | S | R | R | R | U |
| 0053J | Casali et. al. Nat Genet. 2014 Mar;46(3):279-86 | Russia | Beijing  | ERR067620 | R   | R | R | S | R | R | R | U |
| 1892H | Casali et. al. Nat Genet. 2014 Mar;46(3):279-86 | Russia | Beijing  | ERR144590 | R   | R | S | S | R | R | R | U |
| 2472N | Casali et. al. Nat Genet. 2014 Mar;46(3):279-86 | Russia | Beijing  | ERR230007 | R   | R | R | S | R | S | R | S |
| 0389Z | Casali et. al. Nat Genet. 2014 Mar;46(3):279-86 | Russia | Beijing  | ERR133854 | R   | R | R | S | R | R | R | U |
| 0977N | Casali et. al. Nat Genet. 2014 Mar;46(3):279-86 | Russia | Haarlem  | ERR108474 | R   | R | S | R | R | R | R | R |
| 1414N | Casali et. al. Nat Genet. 2014 Mar;46(3):279-86 | Russia | Beijing  | ERR137227 | R   | S | S | S | R | S | S | S |
| 2581G | Casali et. al. Nat Genet. 2014 Mar;46(3):279-86 | Russia | Beijing  | ERR234683 | R   | S | S | S | R | S | S | S |
| 1604V | Casali et. al. Nat Genet. 2014 Mar;46(3):279-86 | Russia | LAM      | ERR067716 | R   | S | S | S | S | S | S | S |
| 2336Q | Casali et. al. Nat Genet. 2014 Mar;46(3):279-86 | Russia | LAM      | ERR228069 | S   | S | S | S | S | S | S | S |
| 2174P | Casali et. al. Nat Genet. 2014 Mar;46(3):279-86 | Russia | Beijing  | ERR228007 | S   | S | S | S | S | S | S | S |
| 0664Y | Casali et. al. Nat Genet. 2014 Mar;46(3):279-86 | Russia | Beijing  | ERR234602 | n/a | R | S | S | R | R | R | U |
| 1336D | Casali et. al. Nat Genet. 2014 Mar;46(3):279-86 | Russia | Ural     | ERR137214 | S   | S | S | S | S | S | U | S |
| 0495P | Casali et. al. Nat Genet. 2014 Mar;46(3):279-86 | Russia | Beijing  | ERR234576 | R   | R | R | S | R | R | R | U |
| 2348D | Casali et. al. Nat Genet. 2014 Mar;46(3):279-86 | Russia | Beijing  | ERR229995 | R   | R | S | S | R | R | U | S |
| 1802K | Casali et. al. Nat Genet. 2014 Mar;46(3):279-86 | Russia | Beijing  | ERR144551 | R   | R | R | S | R | R | R | U |
| 0190H | Casali et. al. Nat Genet. 2014 Mar;46(3):279-86 | Russia | Beijing  | ERR067722 | R   | R | R | S | R | R | R | U |
| 2327F | Casali et. al. Nat Genet. 2014 Mar;46(3):279-86 | Russia | Beijing  | ERR228029 | R   | R | S | S | R | R | R | U |
| 2365X | Casali et. al. Nat Genet. 2014 Mar;46(3):279-86 | Russia | Beijing  | ERR230004 | S   | S | S | S | S | U | S | S |
| 0475S | Casali et. al. Nat Genet. 2014 Mar;46(3):279-86 | Russia | Beijing  | ERR067754 | R   | R | S | S | R | R | R | U |
| 0756Y | Casali et. al. Nat Genet. 2014 Mar;46(3):279-86 | Russia | Beijing  | ERR133925 | S   | S | S | S | S | S | S | S |
| 0048D | Casali et. al. Nat Genet. 2014 Mar;46(3):279-86 | Russia | Beijing  | ERR133799 | R   | S | S | S | R | S | R | S |
| 1558V | Casali et. al. Nat Genet. 2014 Mar;46(3):279-86 | Russia | Beijing  | ERR067714 | R   | R | R | R | R | R | R | R |
| 1530P | Casali et. al. Nat Genet. 2014 Mar;46(3):279-86 | Russia | Beijing  | ERR108450 | R   | R | R | R | S | R | R | R |
| 1237W | Casali et. al. Nat Genet. 2014 Mar;46(3):279-86 | Russia | Beijing  | ERR137205 | R   | S | R | S | S | S | S | S |
| 0305H | Casali et. al. Nat Genet. 2014 Mar;46(3):279-86 | Russia | lineage4 | ERR133841 | R   | S | S | S | F | S | S | S |
| 2266P | Casali et. al. Nat Genet. 2014 Mar;46(3):279-86 | Russia | Beijing  | ERR228018 | S   | S | S | S | S | S | U | S |
| 0029H | Casali et. al. Nat Genet. 2014 Mar;46(3):279-86 | Russia | Ural     | ERR067615 | R   | R | S | R | R | R | R | R |
| 1422X | Casali et. al. Nat Genet. 2014 Mar;46(3):279-86 | Russia | Beijing  | ERR137229 | R   | R | R | R | R | R | R | R |
| 2034M | Casali et. al. Nat Genet. 2014 Mar;46(3):279-86 | Russia | LAM      | ERR144621 | S   | S | S | R | S | S | S | S |
| 2586M | Casali et. al. Nat Genet. 2014 Mar;46(3):279-86 | Russia | LAM      | ERR234685 | S   | S | S | S | S | S | S | S |
| 1867F | Casali et. al. Nat Genet. 2014 Mar;46(3):279-86 | Russia | Haarlem  | ERR144578 | S   | S | S | S | S | S | S | S |
| 2549Y | Casali et. al. Nat Genet. 2014 Mar;46(3):279-86 | Russia | Beijing  | ERR234666 | R   | R | S | S | R | F | R | F |
| 0460B | Casali et. al. Nat Genet. 2014 Mar;46(3):279-86 | Russia | Beijing  | ERR067630 | R   | R | R | S | R | R | F | R |
| 0441F | Casali et. al. Nat Genet. 2014 Mar;46(3):279-86 | Russia | Beijing  | ERR234607 | R   | R | S | R | R | R | U | S |
| 0182Z | Casali et. al. Nat Genet. 2014 Mar;46(3):279-86 | Russia | Beijing  | ERR067582 | R   | S | R | S | R | S | R | S |
| 1690N | Casali et. al. Nat Genet. 2014 Mar;46(3):279-86 | Russia | Beijing  | ERR137257 | R   | R | S | S | R | R | R | S |
| 0107S | Casali et. al. Nat Genet. 2014 Mar;46(3):279-86 | Russia | Beijing  | ERR133802 | S   | S | S | S | S | S | S | S |
| 0701N | Casali et. al. Nat Genet. 2014 Mar;46(3):279-86 | Russia | Beijing  | ERR133908 | R   | R | R | R | R | R | R | R |
| 0875C | Casali et. al. Nat Genet. 2014 Mar;46(3):279-86 | Russia | Haarlem  | ERR133961 | R   | S | S | S | R | S | S | S |
| 0765H | Casali et. al. Nat Genet. 2014 Mar;46(3):279-86 | Russia | lineage4 | ERR108468 | S   | S | S | S | S | S | S | S |
| 2466G | Casali et. al. Nat Genet. 2014 Mar;46(3):279-86 | Russia | lineage4 | ERR229991 | S   | S | S | S | S | S | S | S |
| 1824J | Casali et. al. Nat Genet. 2014 Mar;46(3):279-86 | Russia | Beijing  | ERR144561 | R   | R | S | S | R | R | R | U |
| 0087W | Casali et. al. Nat Genet. 2014 Mar;46(3):279-86 | Russia | Beijing  | ERR234597 | R   | R | S | S | R | R | R | S |
| 1679B | Casali et. al. Nat Genet. 2014 Mar;46(3):279-86 | Russia | Beijing  | ERR108511 | R   | R | S | S | R | R | R | S |
| 2083Q | Casali et. al. Nat Genet. 2014 Mar;46(3):279-86 | Russia | lineage4 | ERR158571 | S   | S | S | S | S | S | S | S |
| 2601D | Casali et. al. Nat Genet. 2014 Mar;46(3):279-86 | Russia | Beijing  | ERR234692 | R   | R | S | S | R | R | R | S |
| 0484C | Casali et. al. Nat Genet. 2014 Mar;46(3):279-86 | Russia | Beijing  | ERR133868 | R   | R | S | S | R | R | R | U |
| 1601R | Casali et. al. Nat Genet. 2014 Mar;46(3):279-86 | Russia | Ural     | ERR108437 | S   | S | S | S | S | S | S | S |
| 0113Z | Casali et. al. Nat Genet. 2014 Mar;46(3):279-86 | Russia | lineage4 | ERR067602 | R   | S | S | R | S | S | S | S |
| 0620A | Casali et. al. Nat Genet. 2014 Mar;46(3):279-86 | Russia | Haarlem  | ERR067734 | S   | S | S | S | S | S | S | S |
| 1816A | Casali et. al. Nat Genet. 2014 Mar;46(3):279-86 | Russia | lineage4 | ERR144557 | S   | S | S | S | S | S | S | S |
| 2349E | Casali et. al. Nat Genet. 2014 Mar;46(3):279-86 | Russia | Haarlem  | ERR230003 | R   | R | S | S | R | R | R | S |
| 1868G | Casali et. al. Nat Genet. 2014 Mar;46(3):279-86 | Russia | Beijing  | ERR144579 | R   | R | R | S | R | R | R | S |
| 2372E | Casali et. al. Nat Genet. 2014 Mar;46(3):279-86 | Russia | Beijing  | ERR229957 | R   | S | S | S | R | S | S | S |
| 0749Q | Casali et. al. Nat Genet. 2014 Mar;46(3):279-86 | Russia | LAM      | ERR133920 | S   | S | S | S | S | S | S | S |
| 1162P | Casali et. al. Nat Genet. 2014 Mar;46(3):279-86 | Russia | Beijing  | ERR137192 | R   | R | R | R | R | R | R | S |
| 1774E | Casali et. al. Nat Genet. 2014 Mar;46(3):279-86 | Russia | lineage4 | ERR144546 | S   | R | S | S | S | S | S | S |
| 0836K | Casali et. al. Nat Genet. 2014 Mar;46(3):279-86 | Russia | Ural     | ERR067657 | R   | R | S | S | R | R | S | S |
| 1471A | Casali et. al. Nat Genet. 2014 Mar;46(3):279-86 | Russia | Beijing  | ERR067707 | R   | R | R | S | R | R | F | S |
| 2567R | Casali et. al. Nat Genet. 2014 Mar;46(3):279-86 | Russia | Beijing  | ERR234671 | R   | R | S | R | R | R | R | R |
| 0823W | Casali et. al. Nat Genet. 2014 Mar;46(3):279-86 | Russia | Beijing  | ERR133950 | S   | S | S | S | S | S | S | S |
| 2537J | Casali et. al. Nat Genet. 2014 Mar;46(3):279-86 | Russia | Beijing  | ERR234662 | R   | S | R | S | R | S | R | S |
| 0571X | Casali et. al. Nat Genet. 2014 Mar;46(3):279-86 | Russia | Beijing  | ERR067765 | R   | R | S | S | R | R |   |   |





|                |              |              |          |     |   |   |     |   |   |   |   |   |
|----------------|--------------|--------------|----------|-----|---|---|-----|---|---|---|---|---|
| DG00537228_S9  | South Africa | South Africa | lineage4 | S   | S | S | S   | S | S | S | S | S |
| BF01332263_S25 | South Africa | South Africa | LAM      | S   | S | S | S   | S | S | S | S | S |
| BN00041405_S21 | South Africa | South Africa | LAM      | S   | S | S | S   | S | S | S | S | S |
| BT00031500_S10 | South Africa | South Africa | LAM      | S   | S | S | S   | S | S | S | S | S |
| CE01938363_S31 | South Africa | South Africa | LAM      | S   | S | S | S   | S | S | S | S | S |
| TRL0116168_S18 | South Africa | South Africa | Beijing  | n/a | R | R | n/a | R | R | R | R | R |
| BF01338219_S2  | South Africa | South Africa | LAM      | S   | S | S | S   | U | S | S | S | S |
| BR00093395_S17 | South Africa | South Africa | Beijing  | S   | S | S | S   | S | S | S | S | S |
| EI00666603_S8  | South Africa | South Africa | Beijing  | S   | S | S | S   | S | S | S | S | S |
| BF01092541_S25 | South Africa | South Africa | S-type   | R   | R | R | S   | R | R | R | U | U |
| CD00934516_S20 | South Africa | South Africa | Beijing  | S   | S | S | S   | S | U | S | S | S |
| EI00603951_S24 | South Africa | South Africa | LAM      | S   | S | S | S   | S | S | S | S | S |
| DG00676352_S17 | South Africa | South Africa | lineage4 | S   | R | R | S   | S | R | S | S | S |
| TRL0044786_S19 | South Africa | South Africa | Haarlem  | R   | R | S | R   | R | R | S | R | R |
| JG00304736_S2  | South Africa | South Africa | S-type   | R   | R | R | R   | R | R | R | R | R |
| TRL0115004_S6  | South Africa | South Africa | X-type   | n/a | R | S | n/a | S | R | S | F | F |
| TRL0113493_S10 | South Africa | South Africa | EAI      | R   | R | R | R   | R | R | R | R | R |
| TRL0116865_S11 | South Africa | South Africa | Beijing  | n/a | R | R | n/a | R | R | R | R | R |
| EI00661011_S12 | South Africa | South Africa | Beijing  | S   | S | S | S   | S | S | S | S | S |
| TRL0091844_S5  | South Africa | South Africa | EAI      | R   | R | R | R   | R | R | R | R | R |
| BT00031455_S8  | South Africa | South Africa | Delhi    | S   | S | S | S   | S | S | S | S | S |
| DG00497195_S6  | South Africa | South Africa | Delhi    | S   | S | S | S   | F | S | S | S | S |
| DH00686932_S3  | South Africa | South Africa | Beijing  | R   | R | S | S   | F | F | F | F | F |
| DG00664475_S13 | South Africa | South Africa | Beijing  | S   | S | S | S   | S | S | S | S | S |
| CG01293502_S1  | South Africa | South Africa | Beijing  | S   | S | S | S   | S | S | S | S | S |
| RD00095112_S10 | South Africa | South Africa | LAM      | R   | R | S | S   | U | S | S | S | S |
| EI00608897_S32 | South Africa | South Africa | Haarlem  | S   | S | S | S   | S | S | S | S | S |
| BQ00025411_S6  | South Africa | South Africa | S-type   | S   | S | S | S   | S | S | S | S | S |
| DG00664485_S7  | South Africa | South Africa | Delhi    | R   | S | S | R   | R | S | S | U | U |
| FD00222433_S28 | South Africa | South Africa | X-type   | R   | R | R | S   | R | R | R | U | U |
| TRL0116219_S20 | South Africa | South Africa | Beijing  | n/a | R | R | n/a | R | R | R | S | S |
| DH00695092_S11 | South Africa | South Africa | Haarlem  | R   | R | R | R   | R | R | R | R | R |
| BR00088314_S16 | South Africa | South Africa | S-type   | R   | R | R | R   | R | R | R | R | R |
| PI00148593_S32 | South Africa | South Africa | LAM      | S   | R | S | S   | S | R | S | S | S |
| TRL0041018_S17 | South Africa | South Africa | LAM      | S   | R | S | S   | S | S | S | S | S |
| CD00809239_S32 | South Africa | South Africa | Beijing  | S   | S | S | S   | S | S | S | S | S |
| BF01127258_S30 | South Africa | South Africa | S-type   | S   | S | S | S   | S | S | S | S | S |
| CE01929749_S11 | South Africa | South Africa | Beijing  | S   | S | S | S   | S | S | S | S | S |
| BR00096737_S28 | South Africa | South Africa | Beijing  | S   | S | S | n/a | S | S | S | S | S |
| BD00574429_S3  | South Africa | South Africa | Beijing  | S   | S | S | S   | S | S | S | S | S |
| BF01457882_S22 | South Africa | South Africa | Beijing  | S   | S | S | S   | S | S | S | S | S |
| BF01491838_S3  | South Africa | South Africa | Haarlem  | S   | S | S | S   | S | S | S | S | S |
| BN00040337_S32 | South Africa | South Africa | Haarlem  | S   | S | S | S   | S | S | S | S | S |
| DH00668828_S20 | South Africa | South Africa | Beijing  | S   | S | S | S   | S | S | S | S | S |
| QF00450839_S14 | South Africa | South Africa | X-type   | S   | R | S | S   | U | R | S | S | S |
| CG01570427_S22 | South Africa | South Africa | Haarlem  | S   | S | S | S   | S | S | S | S | S |
| BF01391370_S28 | South Africa | South Africa | Beijing  | S   | S | S | S   | S | S | S | S | S |
| GH00373068_S23 | South Africa | South Africa | lineage4 | S   | S | S | S   | S | S | S | S | S |
| BF01330892_S26 | South Africa | South Africa | LAM      | S   | S | S | S   | S | S | S | S | S |
| BF01227089_S16 | South Africa | South Africa | Beijing  | S   | S | S | S   | S | S | S | S | S |
| TRL0038616_S12 | South Africa | South Africa | Beijing  | R   | R | S | S   | R | R | S | S | S |
| TRL0113427_S13 | South Africa | South Africa | Haarlem  | R   | R | S | R   | R | R | S | R | R |
| BF01353408_S31 | South Africa | South Africa | Haarlem  | S   | S | S | S   | S | S | S | S | S |
| TRL0114845_S3  | South Africa | South Africa | LAM      | n/a | R | R | n/a | R | R | R | F | F |
| BF01491999_S23 | South Africa | South Africa | S-type   | S   | S | S | S   | S | S | S | S | S |
| BF01498045_S22 | South Africa | South Africa | LAM      | S   | S | S | S   | U | S | S | S | S |
| DG00646980_S4  | South Africa | South Africa | Beijing  | S   | S | S | S   | S | S | S | S | S |
| CD00958113_S26 | South Africa | South Africa | X-type   | S   | S | S | S   | S | S | S | S | S |
| CE01825547_S19 | South Africa | South Africa | Beijing  | S   | S | S | S   | S | S | S | S | S |
| BF01355993_S32 | South Africa | South Africa | S-type   | R   | S | S | S   | S | S | S | S | S |
| CD00862479_S16 | South Africa | South Africa | LAM      | R   | R | R | R   | R | R | R | R | R |
| TRL0073196_S25 | South Africa | South Africa | X-type   | R   | R | S | R   | R | R | R | R | R |
| BQ00030105_S31 | South Africa | South Africa | LAM      | S   | S | S | S   | S | S | S | S | S |
| DH00741625_S10 | South Africa | South Africa | Beijing  | S   | S | S | n/a | S | S | S | S | S |
| BT00028734_S4  | South Africa | South Africa | Beijing  | S   | S | S | S   | F | S | S | S | S |
| CG01611734_S28 | South Africa | South Africa | X-type   | S   | S | S | S   | S | S | U | S | S |
| ED00927883_S7  | South Africa | South Africa | Beijing  | S   | S | S | S   | S | S | S | S | S |
| BT00033633_S21 | South Africa | South Africa | Beijing  | S   | S | S | S   | S | S | S | S | S |
| TRL0022765_S16 | South Africa | South Africa | Beijing  | R   | R | S | R   | R | R | R | R | R |
| CE01707414_S3  | South Africa | South Africa | Beijing  | S   | S | S | S   | S | S | S | S | S |
| DH00628091_S22 | South Africa | South Africa | Haarlem  | S   | S | S | S   | S | S | S | S | S |
| TRL0088085_S26 | South Africa | South Africa | Beijing  | R   | R | R | S   | R | F | R | R | R |
| BK00081681_S19 | South Africa | South Africa | Beijing  | S   | S | S | S   | S | S | S | S | S |
| GH00383070_S2  | South Africa | South Africa | Beijing  | S   | S | S | S   | S | S | S | S | S |
| ED00927899_S1  | South Africa | South Africa | LAM      | S   | S | S | S   | S | S | S | S | S |
| BF01491881_S14 | South Africa | South Africa | Beijing  | S   | S | S | S   | S | S | S | S | S |
| BT00031324_S6  | South Africa | South Africa | Beijing  | S   | S | S | S   | F | S | S | F | F |
| TRL0113347_S12 | South Africa | South Africa | S-type   | R   | R | R | R   | R | R | R | R | R |
| PO00232748_S14 | South Africa | South Africa | LAM      | S   | S | S | S   | S | S | S | S | S |
| DG00497214_S7  | South Africa | South Africa | X-type   | S   | S | S | S   | S | S | S | S | S |
| BH00935270_S22 | South Africa | South Africa | Beijing  | S   | S | S | S   | S | S | S | S | S |
| CG01283125_S32 | South Africa | South Africa | EAI      | S   | S | S | S   | S | U | S | S | S |
| BT00030782_S26 | South Africa | South Africa | X-type   | S   | S | S | S   | S | U | S | S | S |
| DG00674781_S19 | South Africa | South Africa | LAM      | S   | S | S | S   | U | S | S | S | S |
| DH00563988_S26 | South Africa | South Africa | lineage4 | S   | S | S | S   | S | S | S | S | S |
| BF01462180_S24 | South Africa | South Africa | Beijing  | S   | S | S | S   | S | S | S | S | S |
| TRL0115510_S14 | South Africa | South Africa | LAM      | n/a | R | R | n/a | R | R | R | R | R |
| CH00382796_S10 | South Africa | South Africa | X-type   | S   | S | S | S   | S | S | S | S | S |
| BF01165217_S2  | South Africa | South Africa | LAM      | S   | S | S | S   | S | S | S | S | S |
| TRL0115399_S7  | South Africa | South Africa | Beijing  | n/a | R | R | n/a | R | R | R | R | R |
| JG00421329_S17 | South Africa | South Africa | lineage4 | S   | R | S | S   | S | F | S | S | S |
| BK00088622_S21 | South Africa | South Africa | Beijing  | S   | S | S | S   | S | S | S | S | S |
| TRL0115885_S21 | South Africa | South Africa | Beijing  | n/a | R | S | n/a | R | R | S | S | S |
| BK00092074_S31 | South Africa | South Africa | Beijing  | S   | S | S | S   | S | S | S | S | S |
| BK00092214_S19 | South Africa | South Africa | Beijing  | S   | S | S | S   | S | S | S | S | S |
| BF01182050_S12 | South Africa | South Africa | LAM      | S   | S | S | S   | S | S | S | S | S |
| OI00115044_S8  | South Africa | South Africa | lineage4 | S   | R | S | S   | S | R | S | S | S |
| BD00535343_S6  | South Africa | South Africa | Beijing  | S   | S | S | S   | S | S | S | S | S |
| TRL0115627_S17 | South Africa | South Africa | Beijing  | n/a | R | R | n/a | R | R | R | R | R |
| JG00407001_S7  | South Africa | South Africa | S-type   | S   | S | S | S   | S | S | S | S | S |
| TRL0117027_S18 | South Africa | South Africa | Beijing  | n/a | R | S | n/a | S | F | S | S | S |
| BE01336541_S20 | South Africa | South Africa | Beijing  | S   | S | S | S   | S | S | S | S | S |
| TRL0114849_S9  | South Africa | South Africa | Haarlem  | n/a | R | S | n/a | R | R | S | R | R |
| ED00865824_S23 | South Africa | South Africa | Beijing  | S   | S | S | S   | S | S | S | S | S |
| TRL0116938_S15 | South Africa | South Africa | X-type   | n/a | R | R | n/a | R | R | S | R | R |
| DG00574978_S20 | South Africa | South Africa | lineage4 | S   | S | S | S   | S | S | S | S | S |
| DH00748222_S23 | South Africa | South Africa | S-type   | S   | S | S | S   | S | S | S | S | S |
| EI00656774_S9  | South Africa | South Africa | lineage4 | S   | S | S | S   | S | S | S | S | S |
| BT00026108_S4  | South Africa | South Africa | LAM      | S   | S | S | S   | S | S | S | S | S |
| PM00232791_S2  | South Africa | South Africa | EAI      | R   | R | R | R   | R | R | R | R | R |
| GH00391555_S28 | South Africa | South Africa | Haarlem  | S   | S | S | S   | S | S | S | S | S |
| TRL0115207_S18 | South Africa | South Africa | LAM      | n/a | R | R | n/a | R | R | R | R | R |
| TRL0101901_S6  | South Africa | South Africa | X-type   | R   | R | S | R   | R | R | R | R | R |
| TRL0113512_S7  | South Africa | South Africa | X-type   | R   | R | R | S   | R | R | R | U | U |
| RB00104514_S10 | South Africa | South Africa | lineage4 | R   | R | S | S   | R | F | S | S | S |
| PI00170885_S5  | South Africa | South Africa | EAI      | R   | R | R | S   | R | R | R | R | R |











|                |              |                       |     |     |   |     |   |   |   |   |
|----------------|--------------|-----------------------|-----|-----|---|-----|---|---|---|---|
| CD00789586_S20 | South Africa | South Africa S-type   | S   | S   | S | S   | S | S | S | S |
| GH00382137_S24 | South Africa | South Africa lineage4 | S   | S   | S | S   | S | S | S | S |
| CH00361136_S9  | South Africa | South Africa LAM      | S   | S   | S | S   | S | S | S | S |
| GH00353950_S29 | South Africa | South Africa S-type   | S   | S   | S | S   | S | S | S | S |
| BR00088636_S3  | South Africa | South Africa Beijing  | S   | S   | S | S   | S | S | S | F |
| BF01375020_S28 | South Africa | South Africa LAM      | S   | S   | S | S   | S | S | S | S |
| BF01428659_S30 | South Africa | South Africa S-type   | S   | S   | S | S   | S | S | S | S |
| TRL0115096_S13 | South Africa | South Africa X-type   | n/a | R   | R | n/a | R | R | R | U |
| DA00307287_S20 | South Africa | South Africa S-type   | S   | S   | S | S   | S | S | S | S |
| CG01490105_S17 | South Africa | South Africa Beijing  | S   | S   | S | S   | S | S | S | S |
| DA00304536_S14 | South Africa | South Africa Beijing  | S   | S   | S | S   | S | S | S | S |
| BE01478470_S22 | South Africa | South Africa lineage4 | S   | S   | S | S   | S | S | S | S |
| DH00649810_S10 | South Africa | South Africa Beijing  | S   | S   | S | S   | S | S | S | F |
| BT00026180_S25 | South Africa | South Africa X-type   | S   | S   | S | S   | S | S | S | S |
| TRL0114774_S16 | South Africa | South Africa Beijing  | n/a | R   | R | n/a | R | R | R | R |
| BK00092078_S32 | South Africa | South Africa S-type   | R   | n/a | S | n/a | R | S | R | S |
| TRL0115669_S18 | South Africa | South Africa Beijing  | n/a | R   | R | n/a | R | R | R | R |
| FD00247663_S28 | South Africa | South Africa lineage4 | S   | S   | S | S   | S | S | S | S |
| BQ00027337_S11 | South Africa | South Africa S-type   | R   | S   | S | n/a | R | S | U | S |
| DH00618155_S28 | South Africa | South Africa Haarlem  | S   | S   | S | S   | S | S | S | S |
| TRL0114962_S14 | South Africa | South Africa Beijing  | n/a | R   | R | n/a | R | R | R | R |
| BT00031791_S14 | South Africa | South Africa S-type   | S   | S   | S | S   | S | S | S | S |
| CG01593846_S4  | South Africa | South Africa Beijing  | S   | S   | S | S   | S | S | S | S |
| DG00561814_S22 | South Africa | South Africa LAM      | R   | S   | S | S   | R | S | S | S |
| DH00741562_S9  | South Africa | South Africa lineage4 | S   | S   | S | S   | S | S | S | S |
| BF01421069_S15 | South Africa | South Africa LAM      | S   | S   | S | S   | U | S | S | S |
| CE01772649_S13 | South Africa | South Africa Beijing  | R   | S   | S | S   | S | S | S | S |
| BT00028618_S7  | South Africa | South Africa Delhi    | S   | S   | S | S   | S | S | S | S |
| BN00034640_S29 | South Africa | South Africa Haarlem  | S   | S   | S | S   | S | S | S | S |
| BD00703460_S15 | South Africa | South Africa Beijing  | S   | S   | S | S   | S | F | S | S |
| BQ00029771_S27 | South Africa | South Africa LAM      | S   | S   | S | S   | S | S | S | S |
| BF01330971_S12 | South Africa | South Africa X-type   | S   | S   | S | S   | S | S | U | S |
| PL00097805_S26 | South Africa | South Africa LAM      | R   | R   | S | S   | R | R | S | S |
| EI00623322_S7  | South Africa | South Africa lineage4 | R   | S   | S | S   | U | S | S | S |
| CH00387331_S11 | South Africa | South Africa Beijing  | S   | S   | S | S   | S | S | S | S |
| BK00081000_S18 | South Africa | South Africa Beijing  | S   | S   | S | S   | S | F | S | S |
| BD00678576_S22 | South Africa | South Africa LAM      | S   | S   | S | S   | S | S | S | S |
| PO00209791_S11 | South Africa | South Africa Haarlem  | S   | R   | S | S   | S | R | S | S |
| TRL0060765_S13 | South Africa | South Africa S-type   | S   | R   | S | S   | S | R | S | S |
| DH00634083_S30 | South Africa | South Africa Beijing  | R   | S   | S | S   | R | S | S | S |
| PS00217691_S10 | South Africa | South Africa LAM      | R   | R   | S | S   | R | R | S | S |
| TRL0115383_S15 | South Africa | South Africa Beijing  | n/a | R   | S | n/a | F | R | U | S |
| BT00029097_S19 | South Africa | South Africa Haarlem  | S   | S   | S | S   | S | S | S | S |
| DH00680833_S20 | South Africa | South Africa Beijing  | S   | S   | S | S   | S | S | S | S |
| BF01202447_S12 | South Africa | South Africa lineage4 | S   | S   | S | S   | S | S | S | S |
| TRL0114616_S24 | South Africa | South Africa Beijing  | n/a | R   | R | n/a | R | R | R | R |
| GH00363341_S30 | South Africa | South Africa lineage4 | S   | S   | S | S   | S | S | S | S |
| CH00341127_S8  | South Africa | South Africa LAM      | S   | S   | S | S   | S | S | S | S |
| TRL0114833_S12 | South Africa | South Africa Beijing  | n/a | R   | R | n/a | R | R | R | R |
| QE00098167_S8  | South Africa | South Africa X-type   | R   | R   | S | S   | R | R | U | S |
| CH00420650_S30 | South Africa | South Africa LAM      | S   | S   | S | S   | S | S | S | S |
| JG00406968_S6  | South Africa | South Africa X-type   | S   | S   | S | S   | S | S | S | S |
| BN00037979_S5  | South Africa | South Africa Beijing  | S   | S   | S | S   | S | S | S | S |
| TRL0115868_S7  | South Africa | South Africa X-type   | n/a | S   | R | n/a | R | R | R | U |
| BH00946140_S18 | South Africa | South Africa Beijing  | S   | S   | S | S   | S | S | S | S |
| TRL0103669_S13 | South Africa | South Africa Beijing  | R   | R   | S | S   | R | R | S | S |
| BK00079668_S19 | South Africa | South Africa LAM      | S   | S   | S | S   | S | S | S | S |
| BF01355975_S30 | South Africa | South Africa X-type   | S   | S   | S | S   | S | S | S | S |
| BQ00030933_S4  | South Africa | South Africa LAM      | S   | S   | S | S   | S | S | S | S |
| TRL0116109_S14 | South Africa | South Africa EAI      | n/a | S   | S | n/a | S | S | S | S |
| BH00794082_S26 | South Africa | South Africa S-type   | S   | S   | S | S   | S | S | S | S |
| BT00033627_S20 | South Africa | South Africa lineage4 | S   | S   | S | S   | F | S | S | S |
| BR00096736_S27 | South Africa | South Africa X-type   | R   | R   | S | S   | R | R | S | S |
| TRL0065056_S25 | South Africa | South Africa LAM      | S   | R   | S | S   | S | S | S | S |
| EI00666607_S29 | South Africa | South Africa Delhi    | S   | S   | S | S   | F | S | S | F |
| BQ00027771_S12 | South Africa | South Africa Beijing  | S   | S   | S | S   | S | S | S | S |
| DA00306193_S14 | South Africa | South Africa Beijing  | S   | S   | S | S   | S | S | S | S |
| BE01379864_S15 | South Africa | South Africa Beijing  | S   | S   | S | S   | S | S | S | S |
| BF01274561_S17 | South Africa | South Africa Beijing  | S   | S   | S | S   | S | S | S | S |
| BD00629308_S32 | South Africa | South Africa Beijing  | S   | S   | S | S   | S | S | S | S |
| ED00909054_S12 | South Africa | South Africa LAM      | S   | S   | S | S   | S | S | S | S |
| TRL0066006_S26 | South Africa | South Africa X-type   | S   | R   | S | S   | S | S | S | S |
| DH00605289_S27 | South Africa | South Africa LAM      | S   | S   | S | S   | S | S | S | S |
| BF01355978_S31 | South Africa | South Africa Haarlem  | S   | S   | S | S   | S | S | S | S |
| DH00680829_S13 | South Africa | South Africa LAM      | R   | S   | S | S   | S | S | S | S |
| BN00045767_S7  | South Africa | South Africa Beijing  | S   | S   | S | S   | S | S | S | S |
| GH00373073_S9  | South Africa | South Africa LAM      | S   | S   | S | S   | S | S | S | S |
| BF0115378_S5   | South Africa | South Africa Haarlem  | S   | S   | S | S   | S | S | S | S |
| BT00029901_S26 | South Africa | South Africa S-type   | S   | S   | S | S   | S | S | S | S |
| TRL0115581_S15 | South Africa | South Africa Beijing  | n/a | R   | R | n/a | R | R | R | R |
| DH00625221_S26 | South Africa | South Africa S-type   | S   | S   | S | S   | S | S | U | S |
| JG00432562_S9  | South Africa | South Africa lineage4 | S   | S   | S | S   | S | S | S | S |
| CD00970213_S4  | South Africa | South Africa Beijing  | S   | S   | S | S   | S | S | S | S |
| DG00618197_S25 | South Africa | South Africa Beijing  | S   | S   | S | S   | S | S | S | S |
| TRL0112877_S20 | South Africa | South Africa LAM      | R   | R   | S | R   | R | R | S | R |
| GH00389342_S1  | South Africa | South Africa Beijing  | S   | S   | S | S   | S | S | S | S |
| CG01554911_S5  | South Africa | South Africa LAM      | S   | S   | S | S   | S | S | S | S |
| BK00088728_S25 | South Africa | South Africa LAM      | S   | S   | S | S   | S | S | S | S |
| GH00350830_S17 | South Africa | South Africa LAM      | S   | R   | S | S   | S | R | S | S |
| BF01483411_S2  | South Africa | South Africa LAM      | S   | S   | S | S   | S | S | S | S |
| WG00050823_S8  | South Africa | South Africa S-type   | S   | S   | S | S   | S | S | S | S |
| TRL0114792_S4  | South Africa | South Africa Beijing  | n/a | R   | R | n/a | R | R | R | R |
| TRL0116715_S9  | South Africa | South Africa Beijing  | S   | R   | S | n/a | S | R | S | S |
| BH00824877_S8  | South Africa | South Africa X-type   | S   | S   | S | S   | S | S | S | S |
| EF00280850_S29 | South Africa | South Africa Beijing  | S   | S   | S | S   | S | S | S | S |
| EI00660938_S25 | South Africa | South Africa lineage4 | S   | S   | S | S   | S | S | S | S |
| TRL0113671_S18 | South Africa | South Africa LAM      | S   | R   | S | S   | S | R | S | S |
| CG01279230_S31 | South Africa | South Africa LAM      | S   | S   | S | S   | S | S | S | S |
| PK00599668_S16 | South Africa | South Africa LAM      | R   | R   | R | S   | R | R | S | S |
| TRL0116115_S15 | South Africa | South Africa LAM      | n/a | S   | S | n/a | S | S | S | S |
| BK00093448_S32 | South Africa | South Africa LAM      | S   | S   | S | S   | S | S | S | S |
| TRL0114658_S14 | South Africa | South Africa Beijing  | n/a | R   | R | n/a | R | R | R | R |
| BF01310203_S13 | South Africa | South Africa lineage4 | S   | S   | S | S   | S | S | S | S |
| BF01318054_S23 | South Africa | South Africa S-type   | S   | S   | S | S   | S | S | S | S |
| BF01196907_S14 | South Africa | South Africa LAM      | S   | S   | S | S   | S | S | S | S |
| TRL0115030_S10 | South Africa | South Africa LAM      | n/a | R   | R | n/a | R | R | R | R |
| BE01207626_S14 | South Africa | South Africa Beijing  | S   | S   | S | S   | S | S | S | S |
| TRL0115633_S3  | South Africa | South Africa lineage4 | n/a | R   | R | n/a | R | R | R | U |
| BF01216702_S16 | South Africa | South Africa LAM      | S   | S   | S | S   | S | S | S | S |
| GH00389343_S18 | South Africa | South Africa lineage4 | S   | S   | S | S   | S | S | S | S |
| DG00530312_S20 | South Africa | South Africa lineage4 | S   | S   | S | S   | S | S | S | S |
| BD00490075_S5  | South Africa | South Africa Beijing  | S   | S   | S | S   | S | S | S | S |
| TRL0116726_S16 | South Africa | South Africa lineage4 | R   | R   | S | n/a | R | F | S | S |
| DH00634109_S16 | South Africa | South Africa LAM      | S   | S   | S | S   | S | S | S | S |
| TRL0113569_S45 | South Africa | South Africa Beijing  | R   | R   | R | R   | R | R | R | R |
| TRL0113098_S23 | South Africa | South Africa S-type   | R   | R   | R | S   | R | R | R | S |

|                |              |                       |     |   |   |     |   |   |   |   |
|----------------|--------------|-----------------------|-----|---|---|-----|---|---|---|---|
| BD00703455_S16 | South Africa | South Africa Beijing  | S   | S | S | S   | S | S | S | S |
| PE00190349_S18 | South Africa | South Africa LAM      | R   | R | R | S   | R | R | R | R |
| TRL0056535_S30 | South Africa | South Africa Haarlem  | R   | R | S | S   | R | R | U | S |
| TRL0112827_S19 | South Africa | South Africa LAM      | R   | R | S | S   | R | R | S | S |
| BE01487154_S24 | South Africa | South Africa LAM      | S   | S | S | S   | S | S | S | S |
| BD00514520_S1  | South Africa | South Africa Beijing  | S   | S | S | S   | S | S | S | S |
| BE01100694_S7  | South Africa | South Africa LAM      | S   | S | S | S   | S | S | S | S |
| BE01141152_S9  | South Africa | South Africa Beijing  | S   | S | S | S   | S | S | S | S |
| BF01492006_S20 | South Africa | South Africa Beijing  | S   | S | S | n/a | S | S | S | S |
| BE01371373_S21 | South Africa | South Africa lineage4 | S   | S | S | S   | S | S | S | S |
| DG00611914_S7  | South Africa | South Africa Delhi    | S   | S | R | S   | S | S | S | S |
| BN00040586_S18 | South Africa | South Africa Beijing  | S   | S | S | S   | S | S | S | S |
| BF01330879_S10 | South Africa | South Africa Beijing  | S   | S | S | S   | S | S | S | S |
| RF00127752_S27 | South Africa | South Africa LAM      | R   | R | R | R   | R | R | R | R |
| TRL0109157_S20 | South Africa | South Africa Beijing  | R   | R | R | S   | R | R | R | S |
| JG00224441_S4  | South Africa | South Africa lineage4 | R   | R | R | S   | R | R | R | U |
| DH00625230_S28 | South Africa | South Africa LAM      | S   | S | S | S   | S | S | S | S |
| TRL0113005_S21 | South Africa | South Africa S-type   | R   | R | S | R   | R | R | R | R |
| BH00794084_S5  | South Africa | South Africa lineage4 | S   | S | S | S   | S | S | S | S |
| CE01538627_S9  | South Africa | South Africa S-type   | S   | S | S | S   | F | S | S | S |
| BE01314329_S19 | South Africa | South Africa LAM      | S   | S | S | S   | S | S | S | S |
| EI00664567_S21 | South Africa | South Africa LAM      | R   | R | S | S   | R | R | S | S |
| BE01284388_S18 | South Africa | South Africa lineage4 | S   | S | S | R   | S | S | S | S |
| BK00079216_S7  | South Africa | South Africa S-type   | S   | S | S | S   | S | S | U | S |
| BF01178152_S11 | South Africa | South Africa S-type   | S   | S | S | S   | S | S | S | S |
| BK00091915_S29 | South Africa | South Africa LAM      | S   | S | S | S   | S | S | S | S |
| OC0001135_S5   | South Africa | South Africa X-type   | S   | S | S | S   | S | S | S | S |
| PK00685617_S23 | South Africa | South Africa EAI      | R   | R | R | S   | R | R | R | R |
| TRL0105138_S19 | South Africa | South Africa Beijing  | S   | S | S | S   | S | S | S | S |
| CG01388002_S15 | South Africa | South Africa LAM      | S   | S | S | S   | S | S | S | S |
| TRL0115197_S15 | South Africa | South Africa Beijing  | n/a | R | R | n/a | R | R | R | R |
| CE01907630_S9  | South Africa | South Africa S-type   | S   | S | S | S   | S | S | S | S |
| BR00093908_S21 | South Africa | South Africa lineage4 | S   | S | S | S   | S | S | S | S |
| EP00225306_S28 | South Africa | South Africa LAM      | S   | S | S | S   | S | S | S | S |
| JD00110569_S17 | South Africa | South Africa lineage4 | S   | R | S | S   | R | R | S | S |
| PP00150885_S15 | South Africa | South Africa LAM      | S   | S | S | S   | S | S | S | S |
| TRL0116187_S19 | South Africa | South Africa lineage4 | n/a | R | R | n/a | R | R | R | R |
| DG00593793_S15 | South Africa | South Africa Beijing  | S   | S | S | S   | S | S | S | S |
| ED00958949_S30 | South Africa | South Africa LAM      | S   | S | S | S   | S | S | S | S |
| BR00072530_S18 | South Africa | South Africa Beijing  | S   | S | S | R   | S | S | S | S |
| BR00079236_S18 | South Africa | South Africa EAI      | S   | S | S | S   | S | S | S | S |
| BH00815106_S7  | South Africa | South Africa Haarlem  | R   | S | S | S   | S | S | S | S |
| BT00028780_S21 | South Africa | South Africa S-type   | S   | S | S | S   | S | S | S | S |
| TRL0108514_S6  | South Africa | South Africa lineage4 | R   | R | R | S   | R | R | R | U |
| TRL0083468_S23 | South Africa | South Africa LAM      | S   | S | S | S   | S | S | S | F |
| CD00831317_S26 | South Africa | South Africa Beijing  | S   | S | S | S   | S | S | S | S |
| EF00273309_S5  | South Africa | South Africa lineage4 | S   | S | S | S   | S | S | S | S |
| PJ00162888_S8  | South Africa | South Africa Haarlem  | R   | R | R | R   | R | R | R | R |
| TRL0085353_S11 | South Africa | South Africa S-type   | S   | R | S | S   | S | S | S | S |
| ED00957471_S19 | South Africa | South Africa LAM      | R   | S | S | S   | S | S | U | S |
| DH00649794_S9  | South Africa | South Africa X-type   | S   | S | S | S   | F | S | U | S |
| BF01506396_S17 | South Africa | South Africa EAI      | S   | S | S | S   | S | S | S | S |
| BF01381848_S13 | South Africa | South Africa Beijing  | S   | S | S | S   | S | S | S | S |
| TRL0116880_S12 | South Africa | South Africa LAM      | n/a | R | R | n/a | R | R | R | R |
| BH00904043_S11 | South Africa | South Africa EAI      | S   | S | S | S   | S | S | U | S |
| TRL0114479_S10 | South Africa | South Africa X-type   | n/a | R | R | n/a | R | R | R | U |
| FD00212241_S26 | South Africa | South Africa lineage4 | S   | S | S | S   | S | S | S | S |
| BN00037636_S26 | South Africa | South Africa lineage4 | S   | S | S | S   | S | S | S | S |
| BR00093118_S28 | South Africa | South Africa Haarlem  | R   | S | S | S   | F | S | S | S |
| BF01386435_S10 | South Africa | South Africa Haarlem  | S   | S | S | S   | S | S | S | S |
| TRL0031160_S6  | South Africa | South Africa lineage4 | R   | R | R | R   | R | R | R | R |
| TRL0114667_S2  | South Africa | South Africa Beijing  | n/a | R | R | n/a | R | R | R | R |
| TRL0113095_S10 | South Africa | South Africa S-type   | R   | R | R | R   | R | R | R | R |
| BF01175387_S7  | South Africa | South Africa S-type   | S   | S | S | S   | S | S | S | S |
| BF0152222_S19  | South Africa | South Africa LAM      | S   | S | S | S   | F | F | S | S |
| EN00013592_S25 | South Africa | South Africa LAM      | S   | S | S | S   | S | S | S | S |
| TRL0108114_S4  | South Africa | South Africa LAM      | R   | R | S | S   | R | R | S | S |
| BR00092662_S34 | South Africa | South Africa LAM      | S   | S | S | S   | S | S | S | S |
| PK00651442_S30 | South Africa | South Africa Beijing  | R   | R | S | S   | R | R | R | S |
| TRL0113469_S14 | South Africa | South Africa LAM      | R   | R | S | S   | R | R | R | S |
| TRL0114829_S6  | South Africa | South Africa Beijing  | n/a | R | R | n/a | R | R | R | R |
| BH00936808_S8  | South Africa | South Africa Beijing  | S   | R | S | S   | S | F | S | S |
| TRL0099205_S15 | South Africa | South Africa LAM      | S   | R | S | S   | S | R | S | S |
| BN00042248_S28 | South Africa | South Africa LAM      | R   | R | S | R   | R | R | R | R |
| BF01321448_S14 | South Africa | South Africa Beijing  | S   | S | S | S   | S | S | S | S |
| TRL0113487_S15 | South Africa | South Africa LAM      | R   | R | S | S   | R | R | R | S |
| BE01203293_S12 | South Africa | South Africa Beijing  | R   | S | S | S   | R | S | S | S |
| TRL0115283_S19 | South Africa | South Africa Beijing  | n/a | R | R | n/a | R | R | R | R |
| BF01311702_S23 | South Africa | South Africa Haarlem  | S   | S | S | S   | S | S | S | S |
| TRL0116593_S24 | South Africa | South Africa Beijing  | n/a | R | R | n/a | R | R | R | F |
| BE01457107_S22 | South Africa | South Africa S-type   | S   | S | S | S   | S | S | S | S |
| BD00561502_S18 | South Africa | South Africa LAM      | S   | S | S | S   | S | S | S | S |
| TRL0114821_S5  | South Africa | South Africa Haarlem  | n/a | R | R | n/a | R | R | R | R |
| TRL0117008_S16 | South Africa | South Africa Beijing  | R   | R | R | n/a | R | R | R | U |
| TRL0115846_S10 | South Africa | South Africa Beijing  | n/a | R | R | n/a | R | R | R | R |
| TRL0103300_S15 | South Africa | South Africa X-type   | R   | R | S | S   | R | R | R | S |
| BT00031965_S16 | South Africa | South Africa Beijing  | S   | S | S | S   | S | S | S | S |
| BR00093905_S11 | South Africa | South Africa LAM      | S   | S | S | S   | S | S | S | S |
| TRL0115018_S8  | South Africa | South Africa Haarlem  | n/a | R | R | n/a | R | R | R | R |
| TRL0090417_S19 | South Africa | South Africa Beijing  | R   | R | R | S   | R | R | R | S |
| TRL0023642_S1  | South Africa | South Africa X-type   | R   | R | R | R   | R | R | R | R |
| DG00518772_S15 | South Africa | South Africa LAM      | S   | S | S | R   | S | S | S | S |
| BF01236695_S29 | South Africa | South Africa S-type   | R   | S | S | R   | R | S | S | S |
| CD00792640_S24 | South Africa | South Africa lineage4 | S   | S | S | S   | S | S | S | S |
| TRL0086755_S25 | South Africa | South Africa X-type   | S   | R | S | S   | S | R | S | S |
| JA00225792_S1  | South Africa | South Africa lineage4 | S   | S | S | S   | S | S | S | S |
| TRL0112235_S18 | South Africa | South Africa LAM      | R   | R | R | R   | R | R | R | R |
| EB00188206_S4  | South Africa | South Africa Beijing  | S   | S | S | S   | S | S | S | S |
| BF01330972_S27 | South Africa | South Africa Beijing  | S   | S | S | S   | S | S | S | S |
| TRL0113496_S6  | South Africa | South Africa lineage4 | S   | R | S | S   | S | R | S | S |
| BQ00026414_S10 | South Africa | South Africa X-type   | S   | S | S | S   | S | S | S | S |
| BF01445513_S21 | South Africa | South Africa lineage4 | S   | S | S | S   | S | S | S | S |
| CD00937617_S4  | South Africa | South Africa LAM      | R   | S | S | S   | R | S | S | S |
| BF01407000_S1  | South Africa | South Africa Beijing  | R   | S | S | S   | R | S | S | S |
| EI00662151_S13 | South Africa | South Africa Beijing  | S   | S | S | S   | S | S | S | S |
| CG01633852_S29 | South Africa | South Africa Beijing  | S   | S | S | S   | S | S | S | F |
| TRL0115368_S21 | South Africa | South Africa S-type   | n/a | S | S | n/a | S | S | F | S |
| DH00742250_S25 | South Africa | South Africa X-type   | S   | S | S | S   | S | S | S | S |
| BF01199882_S15 | South Africa | South Africa lineage4 | R   | R | S | R   | R | R | U | R |
| BF01481932_S24 | South Africa | South Africa LAM      | S   | S | S | S   | S | S | S | S |
| TRL0115039_S11 | South Africa | South Africa Haarlem  | n/a | R | R | n/a | R | R | R | R |
| BE01194858_S11 | South Africa | South Africa Beijing  | S   | S | S | S   | S | S | S | S |
| BK00077058_S14 | South Africa | South Africa S-type   | R   | R | R | R   | R | R | R | R |
| CE01786354_S3  | South Africa | South Africa lineage4 | S   | S | S | S   | S | S | S | S |
| TRL0107570_S5  | South Africa | South Africa Beijing  | R   | R | R | n/a | R | R | R | S |
| DG00683532_S26 | South Africa | South Africa Delhi    | R   | S | S | R   | S | S | S | U |



|          |     |           |          |               |   |     |   |     |   |   |   |   |
|----------|-----|-----------|----------|---------------|---|-----|---|-----|---|---|---|---|
| 431-10   | MSF | Swaziland | S-type   | ERR552491     | R | R   | R | R   | R | R | R | R |
| 10453-09 | MSF | Swaziland | LAM      | ERR551231     | R | R   | S | S   | U | F | F | S |
| 7713-09  | MSF | Swaziland | Beijing  | ERR551650     | R | R   | R | S   | R | R | R | S |
| 6955-09  | MSF | Swaziland | S-type   | ERR552572 ERR | R | R   | R | R   | R | R | R | R |
| 4347-09  | MSF | Swaziland | EAI      | ERR2199956    | S | S   | S | n/a | S | S | S | S |
| 6243-09  | MSF | Swaziland | X-type   | ERR2200074    | S | S   | S | n/a | S | S | S | S |
| 6085-09  | MSF | Swaziland | lineage4 | ERR2200067    | S | S   | S | n/a | S | S | S | S |
| 5750-09  | MSF | Swaziland | EAI      | ERR2200048 ER | R | S   | S | R   | R | R | U | S |
| 8585-09  | MSF | Swaziland | LAM      | ERR552789     | R | R   | S | R   | R | R | R | R |
| 5088-09  | MSF | Swaziland | S-type   | ERR2199994 ER | R | R   | S | R   | R | R | R | R |
| 4727-09  | MSF | Swaziland | X-type   | ERR2199979    | S | S   | S | n/a | S | S | U | S |
| 4298-09  | MSF | Swaziland | S-type   | ERR551194 ERR | R | n/a | R | R   | R | R | R | R |
| 1060-10  | MSF | Swaziland | EAI      | ERR2199774 ER | S | S   | S | n/a | S | S | S | S |
| 6059-09  | MSF | Swaziland | X-type   | ERR2200064 ER | R | R   | R | R   | R | R | R | U |
| 118-10   | MSF | Swaziland | LAM      | ERR552221     | R | S   | S | S   | R | S | S | S |
| 1054-10  | MSF | Swaziland | LAM      | ERR498238     | R | S   | S | S   | R | S | S | S |
| 5093-09  | MSF | Swaziland | EAI      | ERR2199995    | S | S   | S | n/a | S | S | S | S |
| 603-10   | MSF | Swaziland | S-type   | ERR552763     | R | R   | R | R   | R | R | R | R |
| 5582-09  | MSF | Swaziland | Haarlem  | ERR2200040    | S | S   | S | n/a | S | S | S | S |
| 438-10   | MSF | Swaziland | S-type   | ERR553357     | R | R   | S | R   | R | R | R | R |
| 10301-09 | MSF | Swaziland | lineage4 | ERR2199758 ER | S | R   | S | S   | S | F | S | S |
| 5111-09  | MSF | Swaziland | Delhi    | ERR2200002    | S | S   | S | n/a | S | S | S | S |
| 5755-09  | MSF | Swaziland | Haarlem  | ERR552010     | R | R   | S | R   | R | R | S | R |
| 433-10   | MSF | Swaziland | S-type   | ERR552754     | R | R   | R | R   | R | R | R | R |
| 4723-09  | MSF | Swaziland | S-type   | ERR552083     | R | n/a | R | R   | R | R | R | R |
| 7187-09  | MSF | Swaziland | Beijing  | ERR551979 ERR | S | S   | S | n/a | S | S | S | S |
| 4273-09  | MSF | Swaziland | Haarlem  | ERR2199936    | S | S   | S | n/a | S | S | S | S |
| 5579-09  | MSF | Swaziland | S-type   | ERR552764 ERR | R | R   | R | R   | R | R | R | R |
| 4344-09  | MSF | Swaziland | LAM      | ERR2199953 ER | S | S   | S | n/a | S | S | U | S |
| 10121-09 | MSF | Swaziland | X-type   | ERR2199750 ER | R | R   | R | R   | R | R | R | U |
| 10702-09 | MSF | Swaziland | X-type   | ERR552074 ERR | R | R   | R | n/a | R | R | R | U |
| 7175-09  | MSF | Swaziland | S-type   | ERR552612     | R | R   | R | R   | R | R | R | R |
| 1057-10  | MSF | Swaziland | LAM      | ERR553350     | R | R   | R | S   | R | R | U | S |
| 4711-09  | MSF | Swaziland | lineage4 | ERR2199975    | S | S   | S | n/a | S | S | S | S |
| 5126-09  | MSF | Swaziland | LAM      | ERR2200008    | S | S   | S | n/a | U | S | S | S |
| 5099-09  | MSF | Swaziland | Haarlem  | ERR2199996    | S | S   | S | n/a | S | S | S | S |
| 5106-09  | MSF | Swaziland | EAI      | ERR552115     | R | R   | R | R   | R | R | R | R |
| 10436-09 | MSF | Swaziland | S-type   | ERR2199766 ER | R | n/a | R | R   | R | R | R | R |
| 4285-09  | MSF | Swaziland | X-type   | ERR551941 ERR | S | S   | S | n/a | S | S | S | S |
| 5121-09  | MSF | Swaziland | lineage4 | ERR2200006    | S | S   | S | n/a | S | S | S | S |
| 7186-09  | MSF | Swaziland | lineage4 | ERR553182     | R | S   | S | R   | R | S | S | R |
| 6070-09  | MSF | Swaziland | X-type   | ERR2200065    | S | S   | S | n/a | S | S | S | S |
| 5079-09  | MSF | Swaziland | Haarlem  | ERR2199992    | S | S   | S | n/a | S | S | S | S |
| 4724-09  | MSF | Swaziland | S-type   | ERR552821 ERR | R | n/a | R | R   | R | R | R | R |
| 1053-10  | MSF | Swaziland | X-type   | ERR550959     | R | R   | R | n/a | R | R | R | U |
| 10452-09 | MSF | Swaziland | S-type   | ERR552253 ERR | R | R   | R | R   | R | R | R | R |
| 4695-09  | MSF | Swaziland | LAM      | ERR2199970    | S | S   | S | n/a | U | S | S | S |
| 6643-09  | MSF | Swaziland | X-type   | ERR2200087    | S | S   | S | n/a | S | S | S | S |
| 4339-09  | MSF | Swaziland | lineage4 | ERR552710     | R | R   | S | R   | R | R | R | R |
| 5758-09  | MSF | Swaziland | S-type   | ERR552981     | R | R   | S | S   | R | R | S | S |
| 10298-09 | MSF | Swaziland | S-type   | ERR552875 ERR | R | R   | R | R   | R | R | R | R |
| 4697-09  | MSF | Swaziland | S-type   | ERR2199972    | S | S   | S | n/a | S | S | S | S |
| 5072-09  | MSF | Swaziland | LAM      | ERR2199989    | S | S   | S | n/a | U | S | S | S |
| 5114-09  | MSF | Swaziland | Beijing  | ERR551545     | R | R   | R | R   | R | R | R | U |
| 11237-09 | MSF | Swaziland | EAI      | ERR551739     | R | R   | R | R   | R | R | R | R |
| 4256-09  | MSF | Swaziland | X-type   | ERR2199924    | S | S   | S | n/a | S | S | S | S |
| 5556-09  | MSF | Swaziland | LAM      | ERR2200038    | S | S   | S | n/a | S | S | S | S |
| 4255-09  | MSF | Swaziland | EAI      | ERR2199923    | S | S   | S | n/a | S | S | S | S |
| 5752-09  | MSF | Swaziland | LAM      | ERR2200049    | S | S   | S | n/a | R | S | S | S |
| 11238-09 | MSF | Swaziland | EAI      | ERR552000     | R | R   | R | R   | R | R | R | R |
| 10438-09 | MSF | Swaziland | S-type   | ERR552405     | R | R   | R | R   | R | R | R | R |
| 4269-09  | MSF | Swaziland | Beijing  | ERR2199932    | S | S   | S | n/a | S | S | S | S |
| 5130-09  | MSF | Swaziland | EAI      | ERR2200009    | S | S   | S | n/a | S | S | U | S |
| 10706-09 | MSF | Swaziland | X-type   | ERR2199778 ER | R | R   | R | n/a | R | R | R | U |
| 9085-09  | MSF | Swaziland | S-type   | ERR551298 ERR | R | R   | S | S   | R | R | S | S |
| 10292-09 | MSF | Swaziland | X-type   | ERR552619 ERR | S | S   | S | n/a | S | S | S | S |
| 5105-09  | MSF | Swaziland | LAM      | ERR2199999    | S | S   | S | n/a | S | S | S | S |
| 9562-09  | MSF | Swaziland | X-type   | ERR550863 ERR | R | R   | R | R   | R | R | R | U |
| 7173-09  | MSF | Swaziland | X-type   | ERR553342 ERR | R | R   | R | n/a | R | R | R | U |
| 8786-09  | MSF | Swaziland | Haarlem  | ERR550657     | R | S   | S | S   | R | S | S | S |
| 4258-09  | MSF | Swaziland | LAM      | ERR2199926    | S | S   | S | n/a | S | S | S | S |
| 11015-09 | MSF | Swaziland | S-type   | ERR550861     | R | R   | R | R   | R | R | R | R |
| 4253-09  | MSF | Swaziland | LAM      | ERR2199922    | S | S   | S | n/a | S | S | S | S |
| 4267-09  | MSF | Swaziland | S-type   | ERR2199930    | S | S   | S | n/a | S | S | S | S |
| 4713-09  | MSF | Swaziland | X-type   | ERR553105     | R | R   | R | n/a | R | R | R | U |
| 604-10   | MSF | Swaziland | Beijing  | ERR553241     | S | R   | S | S   | S | R | S | S |
| 5250-09  | MSF | Swaziland | Beijing  | ERR2200015    | S | S   | S | n/a | S | S | S | S |
| 4691-09  | MSF | Swaziland | EAI      | ERR2199969    | S | S   | S | n/a | S | S | S | S |
| 5083-09  | MSF | Swaziland | LAM      | ERR2199993    | S | S   | S | n/a | S | S | S | S |
| 1207-10  | MSF | Swaziland | Beijing  | ERR2199807    | S | S   | S | n/a | S | S | S | S |
| 8313-09  | MSF | Swaziland | LAM      | ERR552989 ERR | R | R   | S | S   | R | R | S | S |
| 4688-09  | MSF | Swaziland | Beijing  | ERR551079     | S | S   | S | n/a | S | S | S | S |
| 10451-09 | MSF | Swaziland | S-type   | ERR552672     | R | R   | R | R   | R | R | R | R |
| 5100-09  | MSF | Swaziland | lineage4 | ERR2199997 ER | R | R   | R | R   | R | R | R | R |
| 4268-09  | MSF | Swaziland | LAM      | ERR2199931    | S | S   | S | n/a | U | S | S | S |
| 6948-09  | MSF | Swaziland | X-type   | ERR2200096    | S | S   | S | n/a | S | S | S | S |
| 117-10   | MSF | Swaziland | Haarlem  | ERR553053     | R | R   | R | R   | R | R | R | R |
| 9080-09  | MSF | Swaziland | S-type   | ERR551536     | R | R   | R | R   | R | R | R | R |
| 4731-09  | MSF | Swaziland | S-type   | ERR552396 ERR | S | S   | S | n/a | S | S | S | S |
| 8318-09  | MSF | Swaziland | X-type   | ERR551240 ERR | R | R   | R | n/a | R | R | R | U |
| 11016-09 | MSF | Swaziland | X-type   | ERR552720     | R | R   | R | n/a | R | R | R | U |
| 110-10   | MSF | Swaziland | EAI      | ERR2199787    | S | S   | S | n/a | S | S | U | S |
| 5741-09  | MSF | Swaziland | lineage4 | ERR552929     | R | S   | S | S   | R | S | S | S |
| 5572-09  | MSF | Swaziland | lineage4 | ERR2200039    | S | S   | S | n/a | S | S | S | S |
| 8779-09  | MSF | Swaziland | X-type   | ERR552916 ERR | R | R   | R | n/a | R | R | R | U |
| 10513-09 | MSF | Swaziland | LAM      | ERR2199771    | S | S   | S | n/a | S | S | S | S |
| 8592-09  | MSF | Swaziland | LAM      | ERR2200119    | S | S   | S | n/a | R | S | S | S |
| 6078-09  | MSF | Swaziland | Beijing  | ERR2200066 ER | R | R   | S | R   | R | R | R | R |
| 7704-09  | MSF | Swaziland | X-type   | ERR552151     | R | R   | S | R   | R | R | R | U |
| 6251-09  | MSF | Swaziland | Beijing  | ERR2200077    | S | S   | S | n/a | S | S | S | S |
| 4283-09  | MSF | Swaziland | Haarlem  | ERR551045     | R | R   | S | R   | R | R | S | R |
| 5122-09  | MSF | Swaziland | lineage4 | ERR2200007    | S | S   | S | n/a | S | S | S | S |
| 8303-09  | MSF | Swaziland | EAI      | ERR553134     | R | R   | R | R   | R | R | R | R |
| 5737-09  | MSF | Swaziland | Beijing  | ERR2200043    | S | S   | S | n/a | S | S | S | S |
| 1202-10  | MSF | Swaziland | X-type   | ERR551692     | R | R   | R | R   | R | R | R | R |
| 7178-09  | MSF | Swaziland | X-type   | ERR552361     | R | R   | R | n/a | R | R | R | U |
| 5102-09  | MSF | Swaziland | LAM      | ERR2199998    | S | S   | S | n/a | S | S | S | S |
| 5268-09  | MSF | Swaziland | X-type   | ERR2200019    | S | S   | S | n/a | S | S | U | S |
| 10704-09 | MSF | Swaziland | S-type   | ERR551280     | R | R   | R | R   | R | R | R | R |
| 4722-09  | MSF | Swaziland | Beijing  | ERR2199977    | S | S   | S | n/a | S | S | S | S |
| 4293-09  | MSF | Swaziland | EAI      | ERR2199942    | S | S   | S | n/a | S | S | U | S |
| 5246-09  | MSF | Swaziland | S-type   | ERR551242     | R | R   | R | R   | R | R | R | R |
| 4696-09  | MSF | Swaziland | EAI      | ERR2199971    | S | S   | S | n/a | S | S | S | S |
| 6949-09  | MSF | Swaziland | S-type   | ERR551757 ERR | R | R   | R | R   | R | R | R | R |
| 5108-09  | MSF | Swaziland | X-type   | ERR2200001    | S | S   | S | n/a | S | S | S | S |
| 10505-09 | MSF | Swaziland | X-type   | ERR551246     | R | R   | R | n/a | R | R | R | U |

|          |     |           |          |               |   |     |   |     |   |   |   |   |
|----------|-----|-----------|----------|---------------|---|-----|---|-----|---|---|---|---|
| 8302-09  | MSF | Swaziland | X-type   | ERR550813     | R | R   | R | n/a | R | R | R | U |
| 8587-09  | MSF | Swaziland | Haarlem  | ERR2200118    | S | S   | S | n/a | S | S | S | S |
| 5264-09  | MSF | Swaziland | LAM      | ERR2200018    | S | S   | S | n/a | S | S | S | S |
| 596-10   | MSF | Swaziland | X-type   | ERR551393     | R | R   | R | n/a | R | R | R | U |
| 4277-09  | MSF | Swaziland | Beijing  | ERR2199938    | S | S   | S | n/a | S | S | S | S |
| 5243-09  | MSF | Swaziland | Beijing  | ERR2200014    | S | S   | S | n/a | S | S | S | S |
| 7185-09  | MSF | Swaziland | S-type   | ERR552124     | R | R   | R | R   | R | R | R | R |
| 5549-09  | MSF | Swaziland | Haarlem  | ERR2200034    | S | S   | S | n/a | S | S | S | S |
| 4296-09  | MSF | Swaziland | Beijing  | ERR551854 ERR | S | S   | S | n/a | S | S | S | S |
| 5256-09  | MSF | Swaziland | lineage4 | ERR2200017    | S | S   | S | n/a | S | S | S | S |
| 8316-09  | MSF | Swaziland | EAI      | ERR2200115    | S | S   | S | n/a | S | U | U | S |
| 10701-09 | MSF | Swaziland | S-type   | ERR552870     | R | n/a | R | R   | R | R | R | R |
| 4730-09  | MSF | Swaziland | LAM      | ERR2199981    | S | S   | S | n/a | U | S | S | S |
| 7716-09  | MSF | Swaziland | X-type   | ERR553185 ERR | R | R   | R | n/a | R | R | R | U |
| 10293-09 | MSF | Swaziland | X-type   | ERR552295 ERR | R | R   | R | n/a | R | R | R | U |
| 11020-09 | MSF | Swaziland | lineage4 | ERR551456     | R | R   | S | R   | R | R | S | R |
| 6266-09  | MSF | Swaziland | LAM      | ERR552071     | R | S   | S | S   | R | S | S | S |
| 9565-09  | MSF | Swaziland | X-type   | ERR2200139    | S | S   | S | n/a | S | S | S | S |
| 5274-09  | MSF | Swaziland | Haarlem  | ERR550872     | R | S   | S | S   | S | S | S | S |
| 5149-09  | MSF | Swaziland | Beijing  | ERR2200011 ER | R | S   | S | n/a | R | S | S | S |
| 173-10   | MSF | Swaziland | LAM      | ERR2199834    | S | S   | S | n/a | S | S | S | S |
| 4288-09  | MSF | Swaziland | Beijing  | ERR553058     | R | R   | R | S   | R | R | R | R |
| 4248-09  | MSF | Swaziland | S-type   | ERR552193     | R | R   | R | R   | R | R | R | R |
| 597-10   | MSF | Swaziland | S-type   | ERR2200058 ER | R | R   | R | R   | R | R | R | R |
| 601-10   | MSF | Swaziland | X-type   | ERR2200060 ER | R | R   | R | R   | R | R | R | U |
| 5148-09  | MSF | Swaziland | Beijing  | ERR2200010    | S | S   | S | n/a | S | S | S | S |
| 4716-09  | MSF | Swaziland | LAM      | ERR2199976    | S | S   | S | n/a | S | S | U | S |
| 5569-09  | MSF | Swaziland | Beijing  | ERR553156 ERR | S | S   | S | n/a | S | S | S | S |
| 5797-09  | MSF | Swaziland | LAM      | ERR551391     | R | S   | S | S   | R | S | S | S |
| 4699-09  | MSF | Swaziland | lineage4 | ERR2199973    | S | S   | S | n/a | S | S | S | S |
| 4290-09  | MSF | Swaziland | EAI      | ERR2199940    | S | S   | S | n/a | S | S | S | S |
| 4259-09  | MSF | Swaziland | LAM      | ERR2199927    | S | S   | S | n/a | S | S | S | S |
| 4257-09  | MSF | Swaziland | Beijing  | ERR2199925    | S | S   | S | n/a | R | S | S | S |
| 7179-09  | MSF | Swaziland | EAI      | ERR552495     | R | R   | R | R   | R | R | R | R |
| 4249-09  | MSF | Swaziland | Haarlem  | ERR2199920    | S | S   | S | n/a | S | S | S | S |
| 4721-09  | MSF | Swaziland | S-type   | ERR553230     | R | R   | R | R   | R | R | R | R |
| 5275-09  | MSF | Swaziland | S-type   | ERR2200022 ER | R | R   | R | R   | R | R | R | R |
| 5273-09  | MSF | Swaziland | Beijing  | ERR2200021    | S | S   | S | n/a | S | S | S | S |
| 10114-09 | MSF | Swaziland | lineage4 | ERR551166     | R | R   | R | R   | R | R | R | R |
| 119-10   | MSF | Swaziland | X-type   | ERR2199805 ER | R | R   | R | R   | R | R | R | U |
| 4286-09  | MSF | Swaziland | X-type   | ERR2199939    | S | S   | S | n/a | S | S | U | S |
| 4271-09  | MSF | Swaziland | LAM      | ERR2199934    | S | S   | S | n/a | R | S | S | S |
| 6945-09  | MSF | Swaziland | EAI      | ERR2200095 ER | R | R   | R | R   | R | R | R | R |
| 4709-09  | MSF | Swaziland | S-type   | ERR550741     | R | R   | R | R   | R | R | R | R |
| 111-10   | MSF | Swaziland | lineage4 | ERR551953     | R | R   | R | R   | R | R | R | R |
| 4297-09  | MSF | Swaziland | EAI      | ERR2199945    | S | S   | S | n/a | S | S | S | S |
| 6652-09  | MSF | Swaziland | X-type   | ERR552073     | R | R   | R | R   | R | R | R | U |
| 1210-10  | MSF | Swaziland | S-type   | ERR551488     | R | R   | R | R   | R | R | R | R |
| 177-10   | MSF | Swaziland | LAM      | ERR2199842    | S | S   | S | n/a | R | S | S | S |
| 7703-09  | MSF | Swaziland | S-type   | ERR552149 ERR | R | R   | R | R   | R | R | R | R |
| 10703-09 | MSF | Swaziland | lineage4 | ERR551289     | R | R   | R | S   | R | R | R | R |
| 5104-09  | MSF | Swaziland | LAM      | ERR550794     | R | S   | S | S   | R | S | S | S |
| 4294-09  | MSF | Swaziland | LAM      | ERR2199943    | S | S   | S | n/a | S | S | U | S |
| 9081-09  | MSF | Swaziland | S-type   | ERR552986 ERR | R | R   | R | R   | R | R | R | R |
| 7699-09  | MSF | Swaziland | Delhi    | ERR2200105    | S | S   | S | n/a | S | S | S | S |
| 5743-09  | MSF | Swaziland | Beijing  | ERR2200044    | S | S   | S | n/a | S | S | S | S |
| 4335-09  | MSF | Swaziland | X-type   | ERR552108 ERR | S | S   | S | n/a | S | S | S | S |
| 4250-09  | MSF | Swaziland | X-type   | ERR2199921    | S | S   | S | n/a | S | S | S | S |
| 5251-09  | MSF | Swaziland | LAM      | ERR553366     | S | R   | S | S   | U | R | S | S |
| 6637-09  | MSF | Swaziland | EAI      | ERR550869     | R | R   | R | R   | R | R | R | R |
| 4687-09  | MSF | Swaziland | LAM      | ERR2199968 ER | S | S   | S | S   | R | S | S | S |
| 4291-09  | MSF | Swaziland | LAM      | ERR2199941    | S | S   | S | n/a | U | S | S | S |
| 5107-09  | MSF | Swaziland | S-type   | ERR2200000    | S | S   | S | n/a | S | S | S | S |
| 7708-09  | MSF | Swaziland | lineage4 | ERR552780     | R | R   | R | n/a | R | R | R | R |
| 7712-09  | MSF | Swaziland | lineage4 | ERR551689     | R | S   | S | S   | R | S | S | S |
| 5551-09  | MSF | Swaziland | lineage4 | ERR2200035    | S | S   | S | n/a | S | S | S | S |
| 9564-09  | MSF | Swaziland | lineage4 | ERR553001 ERR | R | R   | R | R   | R | R | F | R |
| 175-10   | MSF | Swaziland | EAI      | ERR551801     | R | R   | R | R   | R | R | R | R |
| 4276-09  | MSF | Swaziland | Beijing  | ERR553324     | S | S   | S | n/a | S | S | U | S |
| 5748-09  | MSF | Swaziland | EAI      | ERR2200046 ER | R | R   | R | R   | R | R | R | R |
| 5537-09  | MSF | Swaziland | lineage4 | ERR2200030 ER | R | S   | S | S   | R | S | S | S |
| 6247-09  | MSF | Swaziland | Beijing  | ERR2200075 ER | R | R   | R | S   | R | R | R | S |
| 10108-09 | MSF | Swaziland | S-type   | ERR2199747 ER | R | R   | R | R   | R | R | R | R |
| 5076-09  | MSF | Swaziland | S-type   | ERR2199991    | S | S   | S | n/a | S | S | U | S |
| 11239-09 | MSF | Swaziland | EAI      | ERR553321     | R | R   | R | R   | R | R | R | R |
| 5282-09  | MSF | Swaziland | S-type   | ERR2200024    | S | S   | S | n/a | S | S | S | S |
| 4333-09  | MSF | Swaziland | EAI      | ERR2199950    | S | S   | S | n/a | S | S | S | S |
| 6944-09  | MSF | Swaziland | S-type   | ERR2200094 ER | R | R   | R | R   | R | R | R | R |
| 4295-09  | MSF | Swaziland | lineage4 | ERR2199944    | S | S   | S | n/a | S | S | S | S |
| 4287-09  | MSF | Swaziland | Beijing  | ERR619080     | S | S   | S | n/a | R | S | S | S |
| 11023-09 | MSF | Swaziland | S-type   | ERR551014     | R | R   | R | R   | R | R | R | R |
| 5746-09  | MSF | Swaziland | lineage4 | ERR2200045    | S | S   | S | n/a | S | S | S | S |
| 10504-09 | MSF | Swaziland | lineage4 | ERR552273     | R | R   | R | R   | R | R | R | R |
| 4301-09  | MSF | Swaziland | lineage4 | ERR2199947    | S | S   | S | n/a | S | S | S | S |
| 7181-09  | MSF | Swaziland | LAM      | ERR553358     | R | R   | R | R   | R | R | R | R |
| 5115-09  | MSF | Swaziland | S-type   | ERR2200004    | S | S   | S | n/a | S | S | S | S |
| 5759-09  | MSF | Swaziland | Beijing  | ERR2200051    | S | S   | S | n/a | S | S | S | S |
| 1215-10  | MSF | Swaziland | lineage4 | ERR2199813 ER | S | S   | S | n/a | S | S | S | S |
| 4337-09  | MSF | Swaziland | S-type   | ERR2199951    | S | S   | S | n/a | S | S | S | S |
| 5239-09  | MSF | Swaziland | EAI      | ERR2200013    | S | S   | S | n/a | S | S | U | S |
| 4261-09  | MSF | Swaziland | lineage4 | ERR2199928    | S | S   | S | n/a | S | S | S | S |
| 5771-09  | MSF | Swaziland | Beijing  | ERR2200052    | S | S   | S | n/a | S | S | S | S |
| 4262-09  | MSF | Swaziland | LAM      | ERR2199929    | S | S   | S | n/a | S | S | S | S |
| 10507-09 | MSF | Swaziland | Beijing  | ERR553313     | R | R   | R | R   | R | R | R | U |
| 5554-09  | MSF | Swaziland | Haarlem  | ERR2200037    | S | S   | S | n/a | S | S | S | S |
| 7700-09  | MSF | Swaziland | S-type   | ERR552745     | R | R   | R | R   | R | R | R | R |
| 4700-09  | MSF | Swaziland | S-type   | ERR551609     | R | n/a | R | R   | R | R | R | R |
| 5146-09  | MSF | Swaziland | lineage4 | ERR552701     | R | R   | S | R   | R | R | R | R |
| 5109-09  | MSF | Swaziland | S-type   | ERR552540     | R | R   | S | R   | R | R | R | R |
| 4345-09  | MSF | Swaziland | EAI      | ERR2199955    | S | S   | S | n/a | R | S | S | S |
| 5075-09  | MSF | Swaziland | lineage4 | ERR2199990    | S | S   | S | n/a | S | S | S | S |
| 5287-09  | MSF | Swaziland | Beijing  | ERR2200025    | S | S   | S | n/a | S | R | S | S |
| 10512-09 | MSF | Swaziland | EAI      | ERR551319     | R | R   | R | R   | R | R | R | R |
| 6255-09  | MSF | Swaziland | X-type   | ERR551937 ERR | R | R   | R | R   | R | R | R | U |
| 7192-09  | MSF | Swaziland | Haarlem  | ERR551578     | R | R   | S | S   | R | R | U | S |
| 4330-09  | MSF | Swaziland | lineage4 | ERR552456     | R | R   | S | R   | R | R | R | R |
| 10115-09 | MSF | Swaziland | S-type   | ERR2199748 ER | R | R   | R | R   | R | R | R | R |
| 4252-09  | MSF | Swaziland | X-type   | ERR550619     | R | R   | R | R   | R | R | R | R |
| 5073-09  | MSF | Swaziland | X-type   | ERR552751     | R | R   | R | n/a | R | R | R | U |
| 113-10   | MSF | Swaziland | Haarlem  | ERR551537     | R | R   | S | R   | F | F | S | F |
| 11234-09 | MSF | Swaziland | EAI      | ERR2199793 ER | R | R   | R | R   | R | R | R | R |
| 5269-09  | MSF | Swaziland | Haarlem  | ERR2200020    | S | S   | S | n/a | S | S | S | S |
| 8591-09  | MSF | Swaziland | X-type   | ERR552181 ERR | R | R   | R | n/a | R | R | R | U |
| 11236-09 | MSF | Swaziland | EAI      | ERR550754     | R | R   | R | R   | R | R | R | R |
| 8580-09  | MSF | Swaziland | LAM      | ERR2200117    | S | S   | S | n/a | S | S | S | S |
| 5117-09  | MSF | Swaziland | lineage4 | ERR2200005    | S | S   | S | n/a | S | S | S | S |



|                 |                                      |           |          |               |   |     |     |     |         |   |   |   |
|-----------------|--------------------------------------|-----------|----------|---------------|---|-----|-----|-----|---------|---|---|---|
| 6653-09         | MSF                                  | Swaziland | LAM      | ERR2200088    | S | S   | S   | n/a | S       | S | S | S |
| 5069-09         | MSF                                  | Swaziland | X-type   | ERR2199988 ER | R | R   | R   | R   | R       | R | F | F |
| 5558-09         | MSF                                  | Swaziland | EAI      | ERR551899     | R | R   | R   | R   | R       | R | F | R |
| 6087-09         | MSF                                  | Swaziland | X-type   | ERR2200068 ER | S | S   | S   | n/a | S       | S | S | S |
| 8784-09         | MSF                                  | Swaziland | lineage4 | ERR552809     | R | R   | R   | R   | R       | R | R | R |
| 7172-09         | MSF                                  | Swaziland | lineage4 | ERR2200103    | S | S   | S   | n/a | S       | S | S | S |
| 4272-09         | MSF                                  | Swaziland | X-type   | ERR2199935    | S | S   | S   | n/a | S       | S | S | S |
| 10294-09        | MSF                                  | Swaziland | S-type   | ERR2199757 ER | R | R   | R   | R   | R       | R | R | R |
| 6256-09         | MSF                                  | Swaziland | X-type   | ERR2200078    | S | S   | S   | n/a | S       | S | S | S |
| 4712-09         | MSF                                  | Swaziland | X-type   | ERR552518     | R | R   | R   | R   | R       | R | R | R |
| 6268-09         | MSF                                  | Swaziland | Haarlem  | ERR2200080    | S | S   | S   | n/a | S       | S | S | S |
| 6267-09         | MSF                                  | Swaziland | X-type   | ERR552993 ERR | R | R   | R   | R   | R       | R | R | U |
| 5539-09         | MSF                                  | Swaziland | lineage4 | ERR2200032    | S | S   | S   | n/a | S       | S | S | S |
| 5544-09         | MSF                                  | Swaziland | X-type   | ERR2200033    | S | S   | S   | n/a | S       | S | S | S |
| 6269-09         | MSF                                  | Swaziland | Haarlem  | ERR553216     | R | R   | R   | R   | R       | R | R | R |
| 1213-10         | MSF                                  | Swaziland | Haarlem  | ERR2199811 ER | S | S   | S   | S   | S       | S | S | S |
| 7171-09         | MSF                                  | Swaziland | X-type   | ERR553264     | R | R   | R   | n/a | R       | R | R | U |
| 5118-09         | MSF                                  | Swaziland | S-type   | ERR550867 ERR | S | S   | S   | n/a | S       | S | S | S |
| 6265-09         | MSF                                  | Swaziland | Beijing  | ERR552743     | S | S   | S   | n/a | S       | S | S | S |
| 4270-09         | MSF                                  | Swaziland | Beijing  | ERR2199933    | S | S   | S   | n/a | S       | S | S | S |
| 5080-09         | MSF                                  | Swaziland | S-type   | ERR552599     | R | R   | R   | R   | R       | R | R | R |
| 5772-09         | MSF                                  | Swaziland | X-type   | ERR550734     | R | R   | R   | R   | R       | R | R | U |
| 8581-09         | MSF                                  | Swaziland | lineage4 | ERR552463     | R | R   | S   | R   | R       | R | R | R |
| 4289-09         | MSF                                  | Swaziland | LAM      | ERR552352     | R | S   | S   | R   | R       | S | S | R |
| 4725-09         | MSF                                  | Swaziland | S-type   | ERR552637     | R | n/a | R   | R   | R       | R | R | R |
| 8781-09         | MSF                                  | Swaziland | S-type   | ERR552070     | R | R   | R   | R   | R       | R | R | R |
| 10116-09        | MSF                                  | Swaziland | S-type   | ERR2199749    | S | S   | S   | n/a | S       | S | S | S |
| 4275-09         | MSF                                  | Swaziland | LAM      | ERR2199937    | S | S   | S   | n/a | S       | S | S | S |
| 4328-09         | MSF                                  | Swaziland | EAI      | ERR2199949    | S | S   | S   | n/a | S       | S | S | S |
| 4703-09         | MSF                                  | Swaziland | Beijing  | ERR551071     | S | S   | S   | n/a | S       | S | S | S |
| 6249-09         | MSF                                  | Swaziland | Haarlem  | ERR2200076    | S | S   | S   | n/a | S       | S | S | S |
| 6263-09         | MSF                                  | Swaziland | Haarlem  | ERR2200079    | S | S   | S   | n/a | S       | S | S | S |
| 8304-09         | MSF                                  | Swaziland | Beijing  | ERR553116     | S | R   | S   | S   | S       | R | S | S |
| 10442-09        | MSF                                  | Swaziland | lineage4 | ERR2199768 ER | R | R   | S   | R   | R       | R | S | R |
| 5753-09         | MSF                                  | Swaziland | S-type   | ERR552484     | R | R   | R   | R   | R       | R | R | R |
| 8576-09         | MSF                                  | Swaziland | S-type   | ERR553282     | R | R   | R   | R   | R       | R | R | R |
| 5276-09         | MSF                                  | Swaziland | LAM      | ERR2200023    | S | S   | S   | n/a | S       | S | S | S |
| 4735-09         | MSF                                  | Swaziland | LAM      | ERR2199982    | S | S   | S   | n/a | S       | S | S | S |
| 4300-09         | MSF                                  | Swaziland | EAI      | ERR2199946    | S | S   | S   | n/a | S       | S | S | S |
| 4343-09         | MSF                                  | Swaziland | LAM      | ERR2199952    | S | S   | S   | n/a | S       | S | S | S |
| WMB430/43-12700 | Thailand via University of Singapore | Thailand  | Beijing  | SAMN07236448  | S | S   | S   | n/a | S       | S | S | S |
| WMB476/46-10698 | Thailand via University of Singapore | Thailand  | Beijing  | SAMN07236487  | S | S   | S   | n/a | S       | S | S | S |
| WMB261/DS-20512 | Thailand via University of Singapore | Thailand  | Beijing  | SAMN07236285  | R | R   | R   | n/a | R       | R | R | R |
| WMB422/42-19187 | Thailand via University of Singapore | Thailand  | Beijing  | SAMN07236440  | R | S   | S   | n/a | R       | S | S | S |
| WMB322/DS-15901 | Thailand via University of Singapore | Thailand  | Beijing  | SAMN07360950  | R | R   | S   | n/a | R       | F | S | S |
| WMB238/DS-08775 | Thailand via University of Singapore | Thailand  | Beijing  | SAMN07236262  | R | R   | R   | n/a | R       | R | R | U |
| WBB284/DS-31231 | Thailand via University of Singapore | Thailand  | Beijing  | SAMN07236538  | R | R   | R   | n/a | R       | R | R | R |
| WMB321/DS-15862 | Thailand via University of Singapore | Thailand  | Beijing  | SAMN07236343  | R | R   | S   | n/a | F       | F | S | S |
| WMB464/CSF-3542 | Thailand via University of Singapore | Thailand  | Beijing  | SAMN07236477  | S | S   | S   | n/a | S       | S | U | S |
| WMB388/DS-30902 | Thailand via University of Singapore | Thailand  | Beijing  | SAMN07236406  | R | R   | S   | n/a | R       | R | S | S |
| WBB280/DS-29147 | Thailand via University of Singapore | Thailand  | Beijing  | SAMN07236534  | R | R   | R   | n/a | R       | R | R | R |
| WMB300/DS-13819 | Thailand via University of Singapore | Thailand  | Beijing  | SAMN07236322  | R | R   | R   | n/a | R       | R | R | R |
| WMB296/DS-33048 | Thailand via University of Singapore | Thailand  | Beijing  | SAMN07236318  | R | R   | R   | n/a | R       | R | R | R |
| WBB264/DS-17092 | Thailand via University of Singapore | Thailand  | Beijing  | SAMN07236520  | R | R   | S   | n/a | U       | R | R | R |
| WMB382/DS-25482 | Thailand via University of Singapore | Thailand  | Beijing  | SAMN07236400  | R | R   | n/a | n/a | R       | R | S | U |
| WMB366/DS-23415 | Thailand via University of Singapore | Thailand  | Beijing  | SAMN07236385  | R | R   | R   | n/a | R       | R | R | R |
| WMB454/CSF-3382 | Thailand via University of Singapore | Thailand  | Beijing  | SAMN07236469  | S | S   | S   | n/a | S       | S | S | S |
| WMB287/DS-30777 | Thailand via University of Singapore | Thailand  | Beijing  | SAMN07236309  | R | R   | S   | n/a | R       | R | R | R |
| WMB447/CSF-2894 | Thailand via University of Singapore | Thailand  | Beijing  | SAMN07236464  | S | S   | S   | n/a | S       | S | S | S |
| WMB370/DS-24060 | Thailand via University of Singapore | Thailand  | Beijing  | SAMN07236389  | R | R   | R   | n/a | R       | R | R | R |
| WMB340/DS-19383 | Thailand via University of Singapore | Thailand  | Beijing  | SAMN07236360  | R | R   | S   | n/a | R       | R | S | S |
| WMB292/DS-32101 | Thailand via University of Singapore | Thailand  | Beijing  | SAMN07236314  | R | R   | R   | n/a | R       | R | R | R |
| WMB423/43-01910 | Thailand via University of Singapore | Thailand  | EAI      | SAMN07236441  | S | S   | S   | n/a | S       | U | S | S |
| WMB417/DS-20257 | Thailand via University of Singapore | Thailand  | Beijing  | SAMN07236435  | S | S   | S   | n/a | S       | S | S | S |
| WBB260/DS-16780 | Thailand via University of Singapore | Thailand  | Beijing  | SAMN07236516  | R | R   | S   | n/a | U       | R | R | U |
| WMB282/DS-29788 | Thailand via University of Singapore | Thailand  | Beijing  | SAMN07236304  | S | R   | S   | n/a | R       | F | S | U |
| WMB229/DS-16496 | Thailand via University of Singapore | Thailand  | Beijing  | SAMN07236255  | R | R   | R   | n/a | R       | R | R | R |
| WMB409/DS-15367 | Thailand via University of Singapore | Thailand  | Beijing  | SAMN07236427  | S | S   | S   | n/a | S       | S | S | S |
| WMB315/DS-14459 | Thailand via University of Singapore | Thailand  | Beijing  | SAMN07236337  | R | R   | R   | n/a | F       | F | F | F |
| WMB295/DS-32505 | Thailand via University of Singapore | Thailand  | Beijing  | SAMN07236317  | R | R   | S   | n/a | R       | F | U | R |
| WMB361/DS-21625 | Thailand via University of Singapore | Thailand  | Beijing  | SAMN07236380  | R | R   | n/a | n/a | R       | R | S | S |
| WMB222/DS-06765 | Thailand via University of Singapore | Thailand  | Beijing  | SAMN07236248  | R | R   | R   | n/a | R       | R | R | R |
| WMB446/CSF-2498 | Thailand via University of Singapore | Thailand  | Beijing  | SAMN07236463  | S | S   | S   | n/a | S       | S | S | S |
| WMB482/48-10231 | Thailand via University of Singapore | Thailand  | Beijing  | SAMN07236491  | R | S   | S   | n/a | R       | S | S | S |
| WMB342/DS-20136 | Thailand via University of Singapore | Thailand  | EAI      | SAMN07236362  | R | R   | R   | n/a | R       | R | S | S |
| WMB247/DS-11861 | Thailand via University of Singapore | Thailand  | Beijing  | SAMN07236271  | R | R   | R   | n/a | R       | R | R | R |
| WBB261/DS-16825 | Thailand via University of Singapore | Thailand  | Beijing  | SAMN07236517  | R | R   | R   | n/a | R       | S | U | R |
| WMB367/DS-23522 | Thailand via University of Singapore | Thailand  | Beijing  | SAMN07236386  | R | R   | n/a | n/a | R       | R | R | S |
| WMB375/DS-24447 | Thailand via University of Singapore | Thailand  | Beijing  | SAMN07236393  | R | R   | R   | n/a | R       | R | R | F |
| WMB224/DS-13006 | Thailand via University of Singapore | Thailand  | EAI      | SAMN07236250  | R | R   | S   | n/a | R       | R | U | S |
| WMB400/DS-12158 | Thailand via University of Singapore | Thailand  | Beijing  | SAMN07236418  | R | R   | S   | n/a | R       | R | R | R |
| WMB470/CSF-3681 | Thailand via University of Singapore | Thailand  | Beijing  | SAMN07236482  | S | S   | S   | n/a | S       | S | S | S |
| WMB407/DS-15177 | Thailand via University of Singapore | Thailand  | Beijing  | SAMN07236425  | S | S   | S   | n/a | S       | S | S | S |
| WMB479/CSF-3922 | Thailand via University of Singapore | Thailand  | EAI      | SAMN07236489  | S | S   | S   | n/a | U       | S | S | S |
| WMB269/DS-21261 | Thailand via University of Singapore | Thailand  | Beijing  | SAMN07236293  | R | R   | n/a | n/a | Beijing | R | U | R |
| WMB318/DS-15492 | Thailand via University of Singapore | Thailand  | Beijing  | SAMN07236340  | R | R   | S   | n/a | R       | R | R | S |
| WMB297/DS-33051 | Thailand via University of Singapore | Thailand  | Beijing  | SAMN07236319  | R | R   | R   | n/a | Beijing | R | U | R |
| WMB439/46-18357 | Thailand via University of Singapore | Thailand  | EAI      | SAMN07236457  | S | S   | S   | n/a | S       | S | S | S |
| WMB289/DS-31524 | Thailand via University of Singapore | Thailand  | Beijing  | SAMN07236311  | R | R   | R   | n/a | Beijing | R | R | R |
| WMB279/DS-28473 | Thailand via University of Singapore | Thailand  | Beijing  | SAMN07360949  | R | R   | R   | n/a | R       | R | R | S |
| WMB272/DS-24901 | Thailand via University of Singapore | Thailand  | Beijing  | SAMN07236296  | R | R   | R   | n/a | R       | R | U | R |
| WMB254/DS-18227 | Thailand via University of Singapore | Thailand  | Beijing  | SAMN07236278  | R | R   | R   | n/a | R       | R | R | R |
| WMB316/DS-14460 | Thailand via University of Singapore | Thailand  | Beijing  | SAMN07236338  | R | R   | S   | n/a | R       | R | R | R |
| WMB472/CSF-3718 | Thailand via University of Singapore | Thailand  | EAI      | SAMN07236484  | S | S   | S   | n/a | S       | S | S | S |
| WMB244/DS-15773 | Thailand via University of Singapore | Thailand  | Beijing  | SAMN07236268  | R | R   | S   | n/a | R       | R | R | R |
| WMB405/DS-14607 | Thailand via University of Singapore | Thailand  | Beijing  | SAMN07236423  | S | S   | S   | n/a | S       | S | S | S |
| WMB267/DS-21129 | Thailand via University of Singapore | Thailand  | Beijing  | SAMN07236291  | R | R   | R   | n/a | R       | R | R | R |
| WMB415/DS-19997 | Thailand via University of Singapore | Thailand  | EAI      | SAMN07236433  | S | S   | S   | n/a | S       | S | U | S |
| WMB346/DS-20225 | Thailand via University of Singapore | Thailand  | Beijing  | SAMN07236365  | R | R   | R   | n/a | R       | R | R | R |
| WMB291/DS-31852 | Thailand via University of Singapore | Thailand  | Beijing  | SAMN07236313  | R | R   | R   | n/a | R       | R | R | R |
| WMB355/DS-20915 | Thailand via University of Singapore | Thailand  | Beijing  | SAMN07236374  | R | R   | n/a | n/a | R       | R | R | U |
| WMB274/DS-25520 | Thailand via University of Singapore | Thailand  | Beijing  | SAMN07236297  | R | R   | S   | n/a | R       | R | R | S |
| WMB386/DS-25946 | Thailand via University of Singapore | Thailand  | Beijing  | SAMN07236404  | R | R   | n/a | n/a | R       | R | F | S |
| WMB259/DS-19810 | Thailand via University of Singapore | Thailand  | EAI      | SAMN07236283  | R | R   | R   | n/a | R       | F | R | F |
| WMB357/DS-21031 | Thailand via University of Singapore | Thailand  | Beijing  | SAMN07236376  | R | R   | R   | n/a | R       | R | R | U |
| WBB259/DS-16220 | Thailand via University of Singapore | Thailand  | Beijing  | SAMN07236515  | R | R   | R   | n/a | R       | R | R | S |
| WMB418/DS-20316 | Thailand via University of Singapore | Thailand  | Beijing  | SAMN07236436  | S | S   | S   | n/a | S       | S | S | S |
| WMB276/DS-26452 | Thailand via University of Singapore | Thailand  | Beijing  | SAMN07236299  | R | R   | n/a | n/a | Beijing | R | R | F |
| WMB260/DS-20000 | Thailand via University of Singapore | Thailand  | Ural     | SAMN07236284  | R | R   | R   | n/a | R       | R | R | R |
| WMB377/DS-24593 | Thailand via University of Singapore | Thailand  | EAI      | SAMN07236395  | R | R   | S   | n/a | R       | R | S | S |
| WMB275/DS-26102 | Thailand via University of Singapore | Thailand  | Beijing  | SAMN07236298  | S | R   | n/a | n/a | S       | S | S | S |
| WMB414/DS-19861 | Thailand via University of Singapore | Thailand  | Beijing  | SAMN07236432  | S | S   | S   | n/a | S       | S | S | S |
| WMB332/DS-19168 | Thailand via University of Singapore | Thailand  | EAI      | SAMN07236352  | R | R   | R   | n/a | R       | R | S | S |
| WMB480/48-10563 | Thailand via University of Singapore | Thailand  | Beijing  | SAMN07236490  | R | S   | S   | n/a | R       | S | S | S |
| WMB389/DS-30951 | Thailand via University of Singapore | Thailand  | Beijing  | SAMN07236407  | R | R   | S   | n/a | F       | R | S | S |
| WMB271/DS-21363 | Thailand via University of Singapore | Thailand  | Beijing  | SAMN07236295  | R | R   | n/a | n/a | R       | R | R | R |

|                 |                                      |          |          |              |   |   |     |     |   |   |   |   |
|-----------------|--------------------------------------|----------|----------|--------------|---|---|-----|-----|---|---|---|---|
| WMB273/DS-25474 | Thailand via University of Singapore | Thailand | Beijing  | SAMN07360948 | R | R | n/a | n/a | R | R | R | U |
| WBB263/DS-17016 | Thailand via University of Singapore | Thailand | Beijing  | SAMN07236519 | R | R | R   | n/a | R | R | R | F |
| WMB314/DS-14418 | Thailand via University of Singapore | Thailand | Beijing  | SAMN07236336 | R | R | S   | n/a | R | R | R | R |
| WMB319/DS-15504 | Thailand via University of Singapore | Thailand | Beijing  | SAMN07236341 | R | R | R   | n/a | R | R | U | S |
| WMB453/47-5556  | Thailand via University of Singapore | Thailand | Beijing  | SAMN07236468 | S | S | S   | n/a | S | S | S | S |
| WMB406/DS-14963 | Thailand via University of Singapore | Thailand | EAI      | SAMN07236424 | S | S | S   | n/a | S | S | S | S |
| WMB268/DS-21256 | Thailand via University of Singapore | Thailand | Beijing  | SAMN07236292 | R | R | n/a | n/a | R | R | R | U |
| WMB387/DS-26071 | Thailand via University of Singapore | Thailand | Beijing  | SAMN07236405 | R | R | n/a | n/a | R | R | R | R |
| WMB460/CSF-3520 | Thailand via University of Singapore | Thailand | Beijing  | SAMN07236473 | S | S | S   | n/a | S | S | S | S |
| WMB228/DS-13085 | Thailand via University of Singapore | Thailand | EAI      | SAMN07236254 | R | R | S   | n/a | R | R | U | S |
| WMB302/DS-13922 | Thailand via University of Singapore | Thailand | Beijing  | SAMN07236324 | R | R | R   | n/a | R | R | R | R |
| WBB257/DS-15966 | Thailand via University of Singapore | Thailand | Beijing  | SAMN07236513 | R | R | R   | n/a | R | R | R | R |
| WMB383/DS-25553 | Thailand via University of Singapore | Thailand | Beijing  | SAMN07236401 | R | R | n/a | n/a | R | R | R | R |
| WMB416/DS-20072 | Thailand via University of Singapore | Thailand | EAI      | SAMN07236434 | S | S | S   | n/a | S | S | S | S |
| WMB288/DS-30870 | Thailand via University of Singapore | Thailand | EAI      | SAMN07236310 | S | S | S   | n/a | S | S | S | S |
| WMB429/43-12683 | Thailand via University of Singapore | Thailand | lineage4 | SAMN07236447 | S | S | S   | n/a | S | S | S | S |
| WMB253/DS-18044 | Thailand via University of Singapore | Thailand | Ural     | SAMN07236277 | R | R | R   | n/a | R | R | R | R |
| WMB283/DS-30254 | Thailand via University of Singapore | Thailand | Beijing  | SAMN07236305 | R | R | S   | n/a | R | R | R | R |
| WMB394/DS-31799 | Thailand via University of Singapore | Thailand | Beijing  | SAMN07236412 | R | R | R   | n/a | R | R | U | F |
| WMB232/DS-13458 | Thailand via University of Singapore | Thailand | S-type   | SAMN07236257 | R | R | R   | n/a | R | R | U | S |
| WMB363/DS-21768 | Thailand via University of Singapore | Thailand | Beijing  | SAMN07236382 | R | R | n/a | n/a | R | R | R | F |
| WMB484/CSF-4014 | Thailand via University of Singapore | Thailand | EAI      | SAMN07236493 | R | S | S   | n/a | R | U | U | R |
| WMB469/42-20464 | Thailand via University of Singapore | Thailand | Beijing  | SAMN07236481 | S | S | S   | n/a | S | S | S | S |
| WMB330/DS-18964 | Thailand via University of Singapore | Thailand | Beijing  | SAMN07236350 | R | R | R   | n/a | R | R | R | S |
| WMB368/DS-23682 | Thailand via University of Singapore | Thailand | Beijing  | SAMN07236387 | R | R | R   | n/a | R | R | F | S |
| WMB341/DS-20092 | Thailand via University of Singapore | Thailand | Beijing  | SAMN07236361 | R | R | R   | n/a | R | F | F | F |
| WMB245/DS-17305 | Thailand via University of Singapore | Thailand | EAI      | SAMN07236269 | R | R | R   | n/a | R | R | R | F |
| WMB478/48-4979  | Thailand via University of Singapore | Thailand | Beijing  | SAMN07236488 | S | S | S   | n/a | S | S | S | S |
| WMB435/43-19186 | Thailand via University of Singapore | Thailand | EAI      | SAMN07236453 | S | S | S   | n/a | S | S | U | S |
| WMB251/DS-12236 | Thailand via University of Singapore | Thailand | Beijing  | SAMN07236275 | R | R | R   | n/a | R | R | R | R |
| WMB401/DS-16616 | Thailand via University of Singapore | Thailand | Beijing  | SAMN07236419 | R | R | R   | n/a | R | R | S | S |
| WBB283/DS-30971 | Thailand via University of Singapore | Thailand | Beijing  | SAMN07236537 | R | R | R   | n/a | R | R | R | U |
| WMB249/DS-17658 | Thailand via University of Singapore | Thailand | Beijing  | SAMN07236273 | R | R | R   | n/a | R | R | R | R |
| WBB278/DS-27535 | Thailand via University of Singapore | Thailand | Beijing  | SAMN07236532 | R | R | n/a | n/a | R | R | R | R |
| WMB248/DS-15837 | Thailand via University of Singapore | Thailand | EAI      | SAMN07236272 | R | R | R   | n/a | R | R | R | R |
| WMB463/CSF-3541 | Thailand via University of Singapore | Thailand | EAI      | SAMN07236476 | S | S | S   | n/a | S | S | S | S |
| WMB413/DS-19477 | Thailand via University of Singapore | Thailand | lineage4 | SAMN07236431 | S | S | S   | n/a | S | U | U | S |
| WMB290/DS-31545 | Thailand via University of Singapore | Thailand | Beijing  | SAMN07236312 | R | R | R   | n/a | R | R | R | R |
| WMB496/CSF-4650 | Thailand via University of Singapore | Thailand | EAI      | SAMN07236505 | R | S | S   | n/a | S | S | S | S |
| WMB264/DS-20910 | Thailand via University of Singapore | Thailand | Beijing  | SAMN07236288 | R | R | n/a | n/a | R | R | R | U |
| WMB250/DS-10275 | Thailand via University of Singapore | Thailand | Beijing  | SAMN07236274 | R | R | R   | n/a | R | R | R | R |
| WMB280/DS-29208 | Thailand via University of Singapore | Thailand | Beijing  | SAMN07236302 | R | R | R   | n/a | R | R | R | R |
| WMB421/DS-20202 | Thailand via University of Singapore | Thailand | S-type   | SAMN07236439 | S | S | S   | n/a | S | S | S | S |
| WMB326/DS-16282 | Thailand via University of Singapore | Thailand | Beijing  | SAMN07236347 | R | R | S   | n/a | R | R | S | S |
| WMB468/42-14745 | Thailand via University of Singapore | Thailand | S-type   | SAMN07236480 | S | S | S   | n/a | S | S | S | S |
| WBB281/DS-29366 | Thailand via University of Singapore | Thailand | Beijing  | SAMN07236535 | R | R | R   | n/a | R | R | R | U |
| WBB285/DS-32449 | Thailand via University of Singapore | Thailand | Beijing  | SAMN07236539 | R | R | R   | n/a | R | R | R | U |
| WBB265/DS-17653 | Thailand via University of Singapore | Thailand | Beijing  | SAMN07236521 | R | R | R   | n/a | R | R | U | S |
| WMB328/DS-16314 | Thailand via University of Singapore | Thailand | Beijing  | SAMN07236349 | R | R | S   | n/a | S | S | S | S |
| WMB408/DS-15203 | Thailand via University of Singapore | Thailand | Beijing  | SAMN07236426 | S | S | S   | n/a | S | S | S | S |
| WMB376/DS-24457 | Thailand via University of Singapore | Thailand | EAI      | SAMN07236394 | R | R | S   | n/a | S | S | S | S |
| WMB381/DS-25234 | Thailand via University of Singapore | Thailand | Beijing  | SAMN07236399 | R | R | R   | n/a | R | R | R | R |
| WMB462/CSF-3538 | Thailand via University of Singapore | Thailand | EAI      | SAMN07236475 | R | R | R   | n/a | R | R | R | R |
| WBB270/DS-19048 | Thailand via University of Singapore | Thailand | Beijing  | SAMN07236525 | R | R | R   | n/a | R | R | R | S |
| WBB271/DS-19109 | Thailand via University of Singapore | Thailand | Beijing  | SAMN07236526 | R | R | R   | n/a | R | R | R | U |
| WMB362/DS-21639 | Thailand via University of Singapore | Thailand | Beijing  | SAMN07236381 | R | R | n/a | n/a | R | R | R | S |
| WMB286/DS-30535 | Thailand via University of Singapore | Thailand | Beijing  | SAMN07236308 | R | R | S   | n/a | R | R | R | R |
| WMB378/DS-24900 | Thailand via University of Singapore | Thailand | Beijing  | SAMN07236396 | R | R | R   | n/a | R | R | R | S |
| WMB393/DS-31665 | Thailand via University of Singapore | Thailand | Beijing  | SAMN07236411 | R | R | R   | n/a | R | R | R | R |
| WBB276/DS-26339 | Thailand via University of Singapore | Thailand | EAI      | SAMN07236530 | R | R | n/a | n/a | S | S | U | S |
| WMB285/DS-30442 | Thailand via University of Singapore | Thailand | Beijing  | SAMN07236307 | S | R | S   | n/a | S | R | S | S |
| WMB351/DS-20550 | Thailand via University of Singapore | Thailand | Beijing  | SAMN07236370 | R | R | R   | n/a | R | R | R | S |
| WMB379/DS-24957 | Thailand via University of Singapore | Thailand | Tur      | SAMN07236397 | R | R | R   | n/a | R | R | R | S |
| WMB335/DS-19259 | Thailand via University of Singapore | Thailand | Beijing  | SAMN07236355 | R | R | R   | n/a | R | R | R | S |
| WMB448/CSF-3053 | Thailand via University of Singapore | Thailand | EAI      | SAMN07236465 | S | S | S   | n/a | S | S | S | S |
| WMB452/CSF-3367 | Thailand via University of Singapore | Thailand | Beijing  | SAMN07236467 | S | S | S   | n/a | S | S | S | S |
| WMB427/43-11467 | Thailand via University of Singapore | Thailand | Beijing  | SAMN07236445 | S | S | S   | n/a | S | S | S | S |
| WMB457/47-10904 | Thailand via University of Singapore | Thailand | Beijing  | SAMN07236471 | S | S | S   | n/a | S | S | S | S |
| WMB237/DS-16630 | Thailand via University of Singapore | Thailand | Beijing  | SAMN07236261 | R | R | R   | n/a | R | R | R | U |
| WMB334/DS-19200 | Thailand via University of Singapore | Thailand | Beijing  | SAMN07236354 | R | R | R   | n/a | R | R | U | R |
| WMB392/DS-31586 | Thailand via University of Singapore | Thailand | Tur      | SAMN07236410 | R | R | S   | n/a | R | R | U | S |
| WMB309/DS-16144 | Thailand via University of Singapore | Thailand | Beijing  | SAMN07236331 | R | R | R   | n/a | R | R | R | R |
| WMB440/46-19260 | Thailand via University of Singapore | Thailand | lineage4 | SAMN07236458 | S | S | S   | n/a | S | S | S | S |
| WMB475/46-5069  | Thailand via University of Singapore | Thailand | EAI      | SAMN07236486 | S | S | S   | n/a | S | S | S | S |
| WMB236/DS-13671 | Thailand via University of Singapore | Thailand | Beijing  | SAMN07236260 | R | R | R   | n/a | U | R | R | U |
| WMB331/DS-19155 | Thailand via University of Singapore | Thailand | Beijing  | SAMN07236351 | R | R | R   | n/a | R | R | S | S |
| WMB380/DS-25029 | Thailand via University of Singapore | Thailand | Beijing  | SAMN07236398 | R | R | R   | n/a | R | R | R | S |
| WMB384/DS-25707 | Thailand via University of Singapore | Thailand | Beijing  | SAMN07236402 | R | R | n/a | n/a | R | R | S | S |
| WMB403/DS-18613 | Thailand via University of Singapore | Thailand | Beijing  | SAMN07236421 | R | R | S   | n/a | R | R | R | R |
| WMB266/DS-21034 | Thailand via University of Singapore | Thailand | Beijing  | SAMN07236290 | R | R | R   | n/a | R | R | R | R |
| WMB235/DS-11221 | Thailand via University of Singapore | Thailand | Beijing  | SAMN07236259 | R | R | R   | n/a | R | R | R | S |
| WBB262/DS-17012 | Thailand via University of Singapore | Thailand | Beijing  | SAMN07236518 | R | R | R   | n/a | F | F | F | U |
| WBB272/DS-20120 | Thailand via University of Singapore | Thailand | Beijing  | SAMN07236527 | S | R | n/a | n/a | U | R | R | S |
| WMB293/DS-32317 | Thailand via University of Singapore | Thailand | EAI      | SAMN07236315 | R | R | S   | n/a | R | R | U | S |
| WMB350/DS-20503 | Thailand via University of Singapore | Thailand | EAI      | SAMN07236369 | R | R | R   | n/a | S | U | S | S |
| WMB347/DS-20259 | Thailand via University of Singapore | Thailand | Beijing  | SAMN07236366 | R | R | R   | n/a | R | R | S | S |
| WMB364/DS-22290 | Thailand via University of Singapore | Thailand | Beijing  | SAMN07236383 | R | R | n/a | n/a | R | R | R | R |
| WMB471/CSF-3711 | Thailand via University of Singapore | Thailand | EAI      | SAMN07236483 | S | S | S   | n/a | S | S | S | S |
| WMB354/DS-20815 | Thailand via University of Singapore | Thailand | Beijing  | SAMN07236373 | R | R | n/a | n/a | R | R | S | S |
| WMB306/DS-16226 | Thailand via University of Singapore | Thailand | Beijing  | SAMN07236328 | R | R | R   | n/a | R | R | R | S |
| WMB420/DS-20168 | Thailand via University of Singapore | Thailand | EAI      | SAMN07236438 | S | S | S   | n/a | S | S | S | S |
| WBB256/DS-6882  | Thailand via University of Singapore | Thailand | Beijing  | SAMN07236512 | R | R | R   | n/a | R | R | R | R |
| WMB345/DS-20224 | Thailand via University of Singapore | Thailand | Beijing  | SAMN07360951 | R | R | R   | n/a | R | R | R | R |
| WMB225/DS-16260 | Thailand via University of Singapore | Thailand | EAI      | SAMN07236251 | R | R | R   | n/a | R | R | R | R |
| WMB339/DS-19355 | Thailand via University of Singapore | Thailand | Beijing  | SAMN07236359 | R | R | S   | n/a | R | R | S | S |
| WMB371/DS-24258 | Thailand via University of Singapore | Thailand | Beijing  | SAMN07236390 | R | R | R   | n/a | R | R | R | R |
| WBB266/DS-17688 | Thailand via University of Singapore | Thailand | Beijing  | SAMN07236522 | R | R | R   | n/a | R | R | R | S |
| WMB223/DS-10284 | Thailand via University of Singapore | Thailand | Beijing  | SAMN07236249 | R | R | R   | n/a | R | R | U | S |
| WBB255/DS-6265  | Thailand via University of Singapore | Thailand | LAM      | SAMN07236511 | R | R | R   | n/a | R | R | R | S |
| WMB397/DS-32630 | Thailand via University of Singapore | Thailand | Beijing  | SAMN07236415 | R | R | R   | n/a | R | R | R | R |
| WMB312/DS-13295 | Thailand via University of Singapore | Thailand | EAI      | SAMN07236334 | R | R | R   | n/a | R | R | R | U |
| WMB255/DS-18938 | Thailand via University of Singapore | Thailand | Beijing  | SAMN07236279 | R | R | R   | n/a | R | R | R | U |
| WMB410/DS-15561 | Thailand via University of Singapore | Thailand | EAI      | SAMN07236428 | S | S | S   | n/a | S | S | S | S |
| WMB359/DS-21517 | Thailand via University of Singapore | Thailand | Beijing  | SAMN07236378 | R | R | n/a | n/a | R | R | R | S |
| WMB374/DS-24426 | Thailand via University of Singapore | Thailand | lineage4 | SAMN07236392 | R | R | S   | n/a | S | S | S | S |
| WMB303/DS-14490 | Thailand via University of Singapore | Thailand | Beijing  | SAMN07236325 | R | R | R   | n/a | R | R | R | R |
| WMB262/DS-20535 | Thailand via University of Singapore | Thailand | Beijing  | SAMN07236286 | R | R | n/a | n/a | R | R | R | R |
| WMB320/DS-15559 | Thailand via University of Singapore | Thailand | Beijing  | SAMN07236342 | R | R | S   | n/a | R | F | F | S |
| WMB298/CSF-4374 | Thailand via University of Singapore | Thailand | EAI      | SAMN07236320 | R | R | S   | n/a | S | S | S | S |
| WMB465/47-17522 | Thailand via University of Singapore | Thailand | Beijing  | SAMN07236478 | S | S | S   | n/a | S | S | S | S |
| WMB431/43-13037 | Thailand via University of Singapore | Thailand | EAI      | SAMN07236449 | R | S | S   | n/a | R | U | S | S |
| WMB299/DS-34062 | Thailand via University of Singapore | Thailand | Beijing  | SAMN07236321 | R | R | R   | n/a | R | R | U | S |
| WMB353/DS-20813 | Thailand via University of Singapore | Thailand | Beijing  | SAMN07236372 | R | R | n/a | n/a | R | R | S | S |
| WMB352/DS-20670 | Thailand via University of Singapore | Thailand | Beijing  | SAMN07236371 | R | R | R   | n/a | R | R | R | R |
| WMB257/DS-19488 | Thailand via University of Singapore | Thailand | Beijing  | SAMN07236281 | R | R | R   | n/a | R | R | R | S |
| WBB268/DS-17984 | Thailand via University of Singapore | Thailand | Beijing  | SAMN07236523 | R | R | S   | n/a | R | R | S | S |





|            |            |    |              |   |     |     |     |   |   |   |   |
|------------|------------|----|--------------|---|-----|-----|-----|---|---|---|---|
| 14.0609751 | Birmingham | UK | Delhi        | S | S   | S   | S   | S | S | S | S |
| 13.0611150 | Birmingham | UK | EAI          | S | S   | S   | S   | S | S | S | S |
| 15.0613384 | Birmingham | UK | lineage4     | S | S   | S   | S   | S | S | S | S |
| 16.0618501 | Birmingham | UK | Delhi        | S | S   | S   | S   | S | S | S | S |
| 16.0618346 | Birmingham | UK | Delhi        | S | S   | S   | S   | S | S | S | S |
| 16.0604301 | Birmingham | UK | Delhi        | S | S   | S   | S   | S | S | S | S |
| 14.0600715 | Birmingham | UK | lineage4     | S | S   | S   | S   | S | S | S | S |
| 14.0600760 | Birmingham | UK | lineage4     | S | S   | S   | S   | S | S | S | S |
| 13.0609451 | Birmingham | UK | EAI          | S | S   | S   | S   | S | S | S | S |
| 12.0613656 | Birmingham | UK | Beijing      | S | S   | S   | S   | S | S | S | S |
| 13.0609878 | Birmingham | UK | Delhi        | S | S   | S   | S   | S | S | S | S |
| 14.0600791 | Birmingham | UK | Delhi        | S | S   | S   | S   | S | S | S | S |
| 13.0613207 | Birmingham | UK | Delhi        | S | S   | S   | S   | S | S | S | S |
| 15.0601116 | Birmingham | UK | lineage4     | S | S   | S   | S   | S | S | U | S |
| 15.0611664 | Birmingham | UK | Delhi        | S | S   | S   | S   | S | S | S | S |
| 13.0613552 | Birmingham | UK | Delhi        | S | S   | S   | S   | S | S | U | S |
| 16.0618518 | Birmingham | UK | lineage4     | S | S   | S   | S   | S | S | S | S |
| 12.0615228 | Birmingham | UK | Delhi        | S | S   | S   | S   | S | S | S | S |
| 15.0607160 | Birmingham | UK | Delhi        | S | S   | S   | S   | S | S | S | S |
| 16.0604639 | Birmingham | UK | M. bovis     | S | S   | S   | R   | S | S | S | R |
| 14.0609326 | Birmingham | UK | LAM          | S | S   | S   | S   | S | S | S | S |
| 16.0610438 | Birmingham | UK | Delhi        | S | S   | S   | S   | S | S | S | S |
| 10.0604992 | Birmingham | UK | S-type       | S | S   | S   | S   | S | S | S | S |
| 14.0602981 | Birmingham | UK | Delhi        | S | S   | S   | S   | S | S | S | S |
| 14.0600232 | Birmingham | UK | Delhi        | S | S   | S   | S   | S | S | S | S |
| 14.0600968 | Birmingham | UK | Delhi        | S | S   | S   | S   | S | S | U | S |
| 13.0608572 | Birmingham | UK | X-type       | S | S   | S   | S   | S | S | S | S |
| 15.0607529 | Birmingham | UK | EAI          | S | S   | S   | S   | U | S | S | S |
| 16.0601859 | Birmingham | UK | Delhi        | S | S   | S   | S   | S | S | S | S |
| 15.0601192 | Birmingham | UK | Haarlem      | S | S   | S   | S   | S | S | S | S |
| 12.0610875 | Birmingham | UK | Delhi        | S | S   | S   | S   | S | S | S | S |
| 14.0609245 | Birmingham | UK | Delhi        | S | S   | S   | S   | S | S | S | S |
| 16.0603317 | Birmingham | UK | lineage4     | S | S   | S   | S   | S | S | S | S |
| 14.0600418 | Birmingham | UK | Haarlem      | S | S   | S   | S   | S | S | S | S |
| 14.0602059 | Birmingham | UK | LAM          | R | S   | S   | S   | R | S | S | S |
| 15.0607338 | Birmingham | UK | EAI          | S | S   | S   | S   | S | S | S | S |
| 12.0612788 | Birmingham | UK | LAM          | S | S   | S   | S   | S | S | S | S |
| 14.0609529 | Birmingham | UK | EAI          | S | S   | S   | S   | S | S | S | S |
| 12.0615219 | Birmingham | UK | Tur          | R | S   | S   | S   | R | S | S | S |
| 13.0601211 | Birmingham | UK | Tur          | S | S   | S   | S   | S | S | S | S |
| 14.0600472 | Birmingham | UK | LAM          | S | S   | S   | S   | S | S | S | S |
| 15.0606095 | Birmingham | UK | EAI          | R | S   | S   | n/a | R | S | S | S |
| 12.0616381 | Birmingham | UK | EAI          | S | S   | S   | S   | S | S | U | S |
| 16.0601830 | Birmingham | UK | Uganda       | S | S   | S   | S   | S | S | S | S |
| 15.0607931 | Birmingham | UK | lineage4     | S | S   | S   | S   | S | S | S | S |
| 14.0609481 | Birmingham | UK | Beijing      | R | R   | R   | R   | R | R | R | R |
| 16.0617386 | Birmingham | UK | Beijing      | S | S   | S   | S   | S | S | S | S |
| 12.0614867 | Birmingham | UK | Ural         | S | S   | S   | S   | S | S | S | S |
| 15.0601455 | Birmingham | UK | Delhi        | S | S   | S   | S   | S | S | S | S |
| 13.0613205 | Birmingham | UK | EAI          | R | S   | S   | S   | R | S | U | S |
| 13.0615665 | Birmingham | UK | Beijing      | R | R   | S   | n/a | R | R | R | U |
| 15.0601460 | Birmingham | UK | Tur          | S | S   | S   | S   | S | S | S | S |
| 16.0607992 | Birmingham | UK | EAI          | S | S   | S   | S   | S | S | S | S |
| 15.0601431 | Birmingham | UK | EAI          | S | S   | S   | S   | S | S | S | S |
| 15.0601591 | Birmingham | UK | Delhi        | S | S   | S   | S   | S | S | S | S |
| 13.0610508 | Birmingham | UK | Cameroon     | R | S   | S   | S   | R | S | S | S |
| 16.0618344 | Birmingham | UK | EAI          | S | S   | S   | n/a | S | S | S | S |
| 14.0603958 | Birmingham | UK | lineage4     | S | S   | S   | S   | S | S | S | S |
| 14.0600834 | Birmingham | UK | Delhi        | S | S   | S   | S   | S | S | S | S |
| 16.0617147 | Birmingham | UK | Delhi        | S | S   | S   | S   | S | S | S | S |
| 14.0600072 | Birmingham | UK | EAI          | S | S   | S   | S   | S | S | U | S |
| 15.0600271 | Birmingham | UK | Delhi        | R | S   | S   | S   | R | F | S | S |
| 12.0927474 | Birmingham | UK | Beijing      | S | S   | S   | S   | S | S | S | S |
| 16.0607369 | Birmingham | UK | lineage4     | S | S   | S   | S   | U | S | S | S |
| 13.0606625 | Birmingham | UK | X-type       | S | S   | S   | S   | S | S | S | S |
| 13.0607323 | Birmingham | UK | Uganda       | S | S   | S   | S   | S | S | S | S |
| 12.0615645 | Birmingham | UK | Delhi        | S | S   | S   | S   | S | S | S | S |
| 13.0607994 | Birmingham | UK | Haarlem      | S | S   | S   | S   | S | S | S | S |
| 15.0607082 | Birmingham | UK | Delhi        | S | S   | S   | S   | S | S | S | S |
| 15.0601419 | Birmingham | UK | Haarlem      | S | S   | S   | S   | S | S | S | S |
| 13.0613313 | Birmingham | UK | Haarlem      | S | S   | S   | S   | S | S | S | S |
| 16.0617570 | Birmingham | UK | Delhi        | S | S   | S   | S   | S | F | S | S |
| 14.0600890 | Birmingham | UK | Delhi        | S | S   | S   | S   | S | S | S | S |
| 15.0607837 | Birmingham | UK | Beijing      | S | S   | S   | S   | S | S | S | S |
| 14.0600822 | Birmingham | UK | X-type       | S | S   | S   | S   | S | S | S | S |
| 14.0600646 | Birmingham | UK | Delhi        | S | S   | S   | S   | S | S | S | S |
| 13.0608692 | Birmingham | UK | Cameroon     | S | S   | S   | S   | S | S | S | S |
| 14.0606710 | Birmingham | UK | LAM          | S | S   | S   | S   | S | S | S | S |
| 16.0618566 | Birmingham | UK | lineage4     | S | S   | S   | S   | S | S | S | S |
| 16.0600854 | Birmingham | UK | Delhi        | S | S   | S   | S   | S | S | S | S |
| 13.0610479 | Birmingham | UK | Delhi        | S | S   | S   | S   | S | S | S | S |
| 15.0607157 | Birmingham | UK | Tur          | R | S   | S   | S   | R | S | S | S |
| 15.0613496 | Birmingham | UK | Delhi        | S | S   | S   | S   | S | S | S | S |
| 16.0608290 | Birmingham | UK | Delhi        | S | S   | S   | S   | S | S | S | S |
| 16.0607011 | Birmingham | UK | LAM          | S | S   | S   | S   | S | S | S | S |
| 15.0608047 | Birmingham | UK | Delhi        | S | S   | S   | S   | S | S | S | S |
| 13.0613183 | Birmingham | UK | X-type       | S | n/a | S   | S   | S | R | S | S |
| 14.0609667 | Birmingham | UK | lineage4     | S | S   | S   | S   | S | S | S | S |
| 13.0605682 | Birmingham | UK | S-type       | S | S   | S   | S   | S | S | S | S |
| 15.0607921 | Birmingham | UK | EAI          | S | S   | S   | S   | S | S | S | S |
| 14.0609303 | Birmingham | UK | Delhi        | S | S   | n/a | S   | S | S | S | S |
| 16.0607257 | Birmingham | UK | lineage4     | S | S   | S   | S   | S | S | S | S |
| 15.0601461 | Birmingham | UK | EAI          | S | S   | S   | S   | S | S | S | S |
| 09.0600421 | Birmingham | UK | Delhi        | S | S   | S   | S   | S | S | S | S |
| 16.0605013 | Birmingham | UK | West Africar | S | S   | S   | S   | S | U | U | S |
| 13.0605720 | Birmingham | UK | Haarlem      | S | S   | S   | S   | S | S | S | S |
| 13.0607499 | Birmingham | UK | Beijing      | S | S   | S   | S   | S | S | S | S |
| 16.0601660 | Birmingham | UK | Delhi        | S | S   | S   | S   | S | S | S | S |
| 13.0607383 | Birmingham | UK | lineage4     | S | S   | S   | S   | S | S | S | S |
| 16.0605385 | Birmingham | UK | Delhi        | S | S   | S   | S   | S | S | S | S |
| 14.0600211 | Birmingham | UK | lineage4     | S | S   | S   | S   | S | S | S | S |
| 16.0601329 | Birmingham | UK | Delhi        | S | S   | S   | S   | S | U | S | S |
| 15.0601933 | Birmingham | UK | Delhi        | R | R   | S   | S   | R | R | S | S |
| 16.0601171 | Birmingham | UK | Delhi        | S | S   | S   | S   | S | S | S | S |
| 15.0607835 | Birmingham | UK | Delhi        | S | S   | S   | S   | S | F | S | S |
| 13.0613046 | Birmingham | UK | lineage4     | S | S   | S   | S   | S | S | S | S |
| 15.0602904 | Birmingham | UK | Beijing      | R | R   | S   | S   | R | R | S | F |
| 16.0613084 | Birmingham | UK | S-type       | S | S   | S   | n/a | S | S | S | R |
| 16.0607442 | Birmingham | UK | Delhi        | S | S   | S   | S   | S | S | S | S |
| 14.0607804 | Birmingham | UK | Delhi        | S | S   | S   | S   | S | S | S | S |
| 14.0600406 | Birmingham | UK | Haarlem      | S | S   | S   | S   | S | S | S | S |
| 12.0926048 | Birmingham | UK | S-type       | S | S   | S   | S   | S | S | S | S |
| 14.0608109 | Birmingham | UK | M. bovis     | S | S   | S   | R   | S | S | S | R |
| 13.0609268 | Birmingham | UK | Delhi        | S | S   | S   | S   | S | S | S | S |
| 14.0600309 | Birmingham | UK | EAI          | S | S   | S   | S   | S | S | S | S |
| 15.0614506 | Birmingham | UK | Beijing      | R | S   | S   | n/a | R | S | R | S |

|            |            |    |              |     |   |   |     |   |   |   |   |
|------------|------------|----|--------------|-----|---|---|-----|---|---|---|---|
| 14.0600881 | Birmingham | UK | X-type       | S   | S | S | S   | S | S | S | S |
| 13.0610729 | Birmingham | UK | Delhi        | S   | S | S | S   | S | S | S | S |
| 13.0614500 | Birmingham | UK | LAM          | S   | S | S | S   | S | S | S | S |
| 16.0601527 | Birmingham | UK | Beijing      | S   | S | S | S   | S | S | S | S |
| 12.0608580 | Birmingham | UK | Delhi        | S   | S | S | S   | S | U | S | S |
| 16.0607609 | Birmingham | UK | Haarlem      | S   | S | S | S   | S | S | S | S |
| 16.0606604 | Birmingham | UK | Haarlem      | S   | S | S | S   | S | S | S | S |
| 16.0601999 | Birmingham | UK | Delhi        | S   | S | S | S   | S | S | S | S |
| 16.0607165 | Birmingham | UK | Delhi        | S   | S | S | S   | S | S | S | S |
| 12.0927699 | Birmingham | UK | lineage4     | S   | S | S | S   | S | S | S | S |
| 16.0607977 | Birmingham | UK | Delhi        | S   | S | S | S   | S | S | S | S |
| 15.0601633 | Birmingham | UK | Delhi        | S   | S | S | S   | S | S | U | S |
| 13.0607961 | Birmingham | UK | LAM          | S   | S | S | S   | S | U | S | S |
| 14.0609960 | Birmingham | UK | Beijing      | R   | S | S | S   | R | S | R | S |
| 13.0617294 | Birmingham | UK | Delhi        | S   | S | S | n/a | S | S | S | S |
| 12.0613638 | Birmingham | UK | lineage4     | S   | S | S | S   | S | S | S | S |
| 12.0612203 | Birmingham | UK | EAI          | S   | S | S | S   | S | S | S | S |
| 16.0601794 | Birmingham | UK | Uganda       | S   | S | S | S   | S | S | S | S |
| 13.0604896 | Birmingham | UK | X-type       | S   | S | S | S   | S | S | S | S |
| 13.0615631 | Birmingham | UK | West Africar | S   | S | S | S   | S | S | U | S |
| 13.0602577 | Birmingham | UK | Delhi        | S   | S | S | S   | S | S | S | S |
| 15.0615401 | Birmingham | UK | Delhi        | S   | S | S | S   | S | S | S | S |
| 13.0613309 | Birmingham | UK | Delhi        | S   | S | S | S   | S | S | S | S |
| 15.0602762 | Birmingham | UK | lineage4     | S   | S | S | S   | S | S | S | S |
| 14.0600565 | Birmingham | UK | lineage4     | S   | S | S | S   | S | S | S | S |
| 14.0600070 | Birmingham | UK | Haarlem      | S   | S | S | S   | S | S | S | S |
| 15.0601441 | Birmingham | UK | Haarlem      | S   | S | S | S   | S | S | U | S |
| 15.0607698 | Birmingham | UK | lineage4     | S   | S | S | S   | S | S | S | S |
| 14.0609132 | Birmingham | UK | M. bovis     | S   | S | S | R   | S | S | U | R |
| 14.0600910 | Birmingham | UK | M. bovis     | S   | S | S | R   | F | S | U | R |
| 16.0617500 | Birmingham | UK | Delhi        | S   | S | S | S   | S | S | S | S |
| 13.0610759 | Birmingham | UK | EAI          | S   | S | S | S   | S | S | S | S |
| 14.0616171 | Birmingham | UK | Delhi        | S   | S | S | S   | S | S | S | S |
| 13.0605180 | Birmingham | UK | Delhi        | S   | S | S | S   | S | S | S | U |
| 14.0600622 | Birmingham | UK | Beijing      | S   | S | S | S   | S | S | S | S |
| 16.0601530 | Birmingham | UK | West Africar | S   | S | S | S   | S | U | U | S |
| 15.0601298 | Birmingham | UK | Delhi        | S   | S | S | S   | S | S | U | S |
| 14.0600129 | Birmingham | UK | Delhi        | S   | S | S | S   | S | S | S | S |
| 11.0607091 | Birmingham | UK | Haarlem      | n/a | S | S | S   | S | S | S | S |
| 13.0604053 | Birmingham | UK | Delhi        | S   | S | S | S   | S | S | S | S |
| 14.0600534 | Birmingham | UK | X-type       | S   | S | S | S   | S | S | S | S |
| 15.0601979 | Birmingham | UK | Delhi        | S   | S | S | S   | S | S | S | S |
| 13.0618062 | Birmingham | UK | Cameroon     | S   | S | S | S   | S | S | U | S |
| 13.0600045 | Birmingham | UK | Delhi        | S   | S | S | S   | S | S | S | S |
| 15.0614148 | Birmingham | UK | lineage4     | S   | S | S | S   | S | S | U | S |
| 16.0617384 | Birmingham | UK | LAM          | S   | S | S | S   | S | S | U | S |
| 14.0600401 | Birmingham | UK | EAI          | S   | S | S | S   | S | S | S | S |
| 15.0607151 | Birmingham | UK | lineage4     | S   | S | S | S   | S | S | S | S |
| 14.0601000 | Birmingham | UK | Cameroon     | S   | S | S | S   | S | S | S | S |
| 14.0600167 | Birmingham | UK | EAI          | S   | S | S | S   | S | S | S | S |
| 16.0607357 | Birmingham | UK | EAI          | S   | S | S | S   | S | S | S | S |
| 16.0600501 | Birmingham | UK | lineage4     | S   | S | S | S   | S | S | S | S |
| 16.0601716 | Birmingham | UK | LAM          | S   | S | S | S   | S | S | S | S |
| 13.0607866 | Birmingham | UK | Delhi        | S   | S | S | S   | S | S | S | S |
| 10.0609409 | Birmingham | UK | Delhi        | S   | S | S | S   | S | S | U | S |
| 12.0612519 | Birmingham | UK | Delhi        | R   | S | S | S   | R | S | U | S |
| 16.0618433 | Birmingham | UK | EAI          | S   | S | S | S   | S | S | S | S |
| 16.0618281 | Birmingham | UK | EAI          | S   | S | S | S   | S | S | S | S |
| 15.0601101 | Birmingham | UK | Beijing      | R   | R | R | R   | R | R | R | R |
| 12.0614150 | Birmingham | UK | X-type       | S   | S | S | S   | S | S | S | S |
| 15.0613478 | Birmingham | UK | Haarlem      | S   | S | S | S   | S | S | S | S |
| 14.0600585 | Birmingham | UK | Cameroon     | S   | S | S | S   | S | S | S | S |
| 13.0609260 | Birmingham | UK | Delhi        | S   | S | S | S   | S | S | S | S |
| 14.0613579 | Birmingham | UK | LAM          | S   | S | S | S   | S | S | S | S |
| 13.0609437 | Birmingham | UK | Delhi        | S   | S | S | S   | S | S | S | S |
| 13.0616622 | Birmingham | UK | lineage4     | S   | S | S | S   | S | S | S | S |
| 13.0617139 | Birmingham | UK | Delhi        | S   | S | S | S   | S | R | S | S |
| 14.0609470 | Birmingham | UK | Delhi        | S   | S | S | S   | S | S | S | S |
| 14.0600468 | Birmingham | UK | Delhi        | S   | S | S | S   | S | S | S | S |
| 13.0613203 | Birmingham | UK | lineage4     | S   | S | S | S   | S | S | S | S |
| 12.0611024 | Birmingham | UK | lineage4     | S   | S | S | S   | S | S | S | S |
| 13.0600579 | Birmingham | UK | Delhi        | S   | S | S | S   | F | S | S | S |
| 12.0614993 | Birmingham | UK | LAM          | S   | S | S | S   | S | S | S | S |
| 15.0601360 | Birmingham | UK | Beijing      | S   | S | S | S   | S | S | S | S |
| 16.0606962 | Birmingham | UK | lineage4     | S   | S | S | S   | S | S | S | S |
| 15.0608181 | Birmingham | UK | Haarlem      | S   | S | S | S   | S | S | U | S |
| 16.0617145 | Birmingham | UK | Cameroon     | n/a | S | S | S   | R | S | S | S |
| 13.0609450 | Birmingham | UK | Delhi        | S   | S | S | S   | S | S | S | S |
| 14.0613536 | Birmingham | UK | Beijing      | R   | R | R | R   | R | R | S | F |
| 14.0609731 | Birmingham | UK | lineage4     | S   | S | S | S   | S | S | S | S |
| 11.0600002 | Birmingham | UK | Delhi        | S   | S | S | S   | S | S | U | S |
| 13.0605670 | Birmingham | UK | Delhi        | S   | S | S | S   | S | S | S | S |
| 13.0605667 | Birmingham | UK | Delhi        | S   | S | S | S   | S | S | S | S |
| 13.0604518 | Birmingham | UK | S-type       | S   | S | S | S   | S | U | S | S |
| 16.0606291 | Birmingham | UK | EAI          | S   | S | S | S   | S | S | S | S |
| 16.0611579 | Birmingham | UK | lineage4     | S   | S | S | n/a | S | S | S | S |
| 15.0613463 | Birmingham | UK | EAI          | S   | S | S | n/a | S | S | S | S |
| 14.0616088 | Birmingham | UK | EAI          | S   | S | S | S   | S | S | U | S |
| 13.0608099 | Birmingham | UK | Delhi        | S   | S | S | S   | S | S | S | S |
| 15.0607946 | Birmingham | UK | X-type       | S   | S | S | S   | S | S | S | S |
| 14.0600481 | Birmingham | UK | Delhi        | S   | S | S | S   | S | S | S | S |
| 14.0600972 | Birmingham | UK | Delhi        | R   | R | R | R   | R | R | R | R |
| 15.0601750 | Birmingham | UK | X-type       | S   | S | S | S   | S | S | S | S |
| 13.0610477 | Birmingham | UK | EAI          | S   | S | S | S   | S | S | S | S |
| 16.0617041 | Birmingham | UK | M. bovis     | S   | S | S | R   | S | S | U | R |
| 15.0607640 | Birmingham | UK | Delhi        | S   | S | S | S   | S | S | S | S |
| 16.0601008 | Birmingham | UK | Cameroon     | S   | S | S | S   | S | S | S | S |
| 16.0617611 | Birmingham | UK | X-type       | S   | S | S | S   | S | S | S | S |
| 15.0613346 | Birmingham | UK | EAI          | S   | S | S | n/a | S | S | S | S |
| 14.0609622 | Birmingham | UK | lineage4     | S   | S | S | S   | S | S | S | S |
| 15.0611900 | Birmingham | UK | lineage4     | S   | S | S | S   | S | S | S | S |
| 16.0601923 | Birmingham | UK | LAM          | S   | S | S | S   | S | S | S | S |
| 15.0607333 | Birmingham | UK | Tur          | S   | S | S | S   | S | S | S | S |
| 09.0601167 | Birmingham | UK | Beijing      | S   | S | S | S   | S | S | S | F |
| 16.0601373 | Birmingham | UK | EAI          | S   | S | S | S   | S | S | S | S |
| 16.0614143 | Birmingham | UK | Delhi        | S   | S | S | S   | S | S | S | S |
| 14.0611813 | Birmingham | UK | Delhi        | S   | S | S | S   | S | S | S | S |
| 14.0609424 | Birmingham | UK | lineage4     | S   | S | S | S   | S | S | S | S |
| 13.0608332 | Birmingham | UK | X-type       | S   | S | S | S   | S | S | S | S |
| 16.0618305 | Birmingham | UK | Delhi        | S   | S | S | S   | S | S | S | S |
| 11.0611138 | Birmingham | UK | Beijing      | S   | S | S | S   | S | S | S | S |
| 16.0618273 | Birmingham | UK | lineage4     | S   | S | S | S   | S | S | S | S |
| 13.0609635 | Birmingham | UK | Haarlem      | S   | S | S | S   | R | S | S | S |
| 13.0604524 | Birmingham | UK | Delhi        | S   | S | S | S   | S | S | S | S |
| 15.0613347 | Birmingham | UK | Haarlem      | S   | S | S | S   | S | S | S | S |
| 14.0600093 | Birmingham | UK | Beijing      | S   | S | S | R   | S | S | S | R |













|            |            |    |              |     |     |     |     |   |   |   |   |
|------------|------------|----|--------------|-----|-----|-----|-----|---|---|---|---|
| 15.0607777 | Birmingham | UK | Delhi        | S   | S   | S   | n/a | S | S | S | R |
| 15.0613131 | Birmingham | UK | West Africar | n/a | n/a | n/a | S   | S | F | U | S |
| 13.0604881 | Birmingham | UK | X-type       | S   | S   | S   | S   | S | S | S | S |
| 12.0613618 | Birmingham | UK | LAM          | S   | S   | S   | S   | S | S | S | S |
| 13.0610340 | Birmingham | UK | Ural         | R   | R   | S   | R   | R | R | R | U |
| 14.0613032 | Birmingham | UK | Delhi        | S   | S   | S   | S   | S | S | S | S |
| 14.0603310 | Birmingham | UK | Beijing      | R   | R   | S   | S   | R | R | S | F |
| 16.0618304 | Birmingham | UK | lineage4     | S   | S   | S   | S   | F | S | S | F |
| 14.0600487 | Birmingham | UK | Beijing      | R   | S   | S   | S   | R | S | S | S |
| 13.0613246 | Birmingham | UK | Delhi        | R   | S   | S   | S   | R | S | S | S |
| 13.0603119 | Birmingham | UK | lineage4     | S   | S   | S   | S   | S | S | S | S |
| 15.0607738 | Birmingham | UK | lineage4     | R   | R   | S   | R   | R | R | R | R |
| 13.0612469 | Birmingham | UK | EAI          | S   | S   | S   | S   | S | S | S | S |
| 16.0610525 | Birmingham | UK | Haarlem      | S   | S   | S   | S   | S | S | S | S |
| 13.0605676 | Birmingham | UK | Delhi        | R   | S   | S   | S   | R | S | S | S |
| 13.0604904 | Birmingham | UK | EAI          | S   | S   | S   | S   | U | S | S | S |
| 15.0607202 | Birmingham | UK | EAI          | S   | S   | S   | S   | S | S | S | S |
| 13.0613129 | Birmingham | UK | Delhi        | S   | S   | S   | S   | S | S | S | S |
| 09.0601854 | Birmingham | UK | LAM          | S   | S   | S   | S   | S | S | S | S |
| 16.0607678 | Birmingham | UK |              | R   | R   | R   | n/a | R | F | R | F |
| 13.0600560 | Birmingham | UK | Beijing      | S   | S   | S   | S   | S | S | S | S |
| 16.0618443 | Birmingham | UK | LAM          | S   | S   | S   | S   | S | S | S | S |
| 12.0613640 | Birmingham | UK | Cameroon     | R   | S   | S   | S   | R | S | S | S |
| 16.0610390 | Birmingham | UK | Delhi        | S   | S   | S   | S   | S | S | S | S |
| 13.0601572 | Birmingham | UK | Delhi        | S   | S   | S   | S   | U | S | S | S |
| 13.0610753 | Birmingham | UK | EAI          | S   | S   | S   | S   | S | S | S | S |
| 13.0610487 | Birmingham | UK | lineage4     | S   | S   | S   | S   | S | S | S | S |
| 16.0617134 | Birmingham | UK | Delhi        | S   | S   | S   | S   | S | S | S | S |
| 14.0609177 | Birmingham | UK | LAM          | S   | S   | S   | S   | S | S | S | S |
| 13.0610505 | Birmingham | UK | Delhi        | S   | S   | S   | S   | S | S | S | S |
| 16.0601832 | Birmingham | UK | Beijing      | R   | R   | R   | S   | R | R | R | S |
| 13.0603114 | Birmingham | UK | Beijing      | R   | R   | S   | R   | R | R | R | R |
| 15.0601637 | Birmingham | UK | Delhi        | S   | S   | S   | S   | S | S | S | S |
| 15.0601497 | Birmingham | UK | Delhi        | S   | S   | S   | S   | S | S | S | S |
| 14.0600065 | Birmingham | UK | lineage4     | S   | S   | S   | S   | S | S | S | S |
| 15.0601709 | Birmingham | UK | EAI          | S   | S   | S   | S   | S | S | S | S |
| 15.0601395 | Birmingham | UK | Delhi        | S   | S   | S   | S   | S | S | S | S |
| 13.0613536 | Birmingham | UK | Haarlem      | S   | S   | S   | S   | S | S | S | S |
| 14.0607822 | Birmingham | UK | lineage4     | S   | S   | S   | S   | S | S | S | S |
| 16.0607887 | Birmingham | UK | Delhi        | S   | S   | S   | S   | S | S | S | S |
| 15.0601891 | Birmingham | UK | Delhi        | S   | S   | S   | S   | S | S | S | S |
| 15.0601660 | Birmingham | UK | Delhi        | S   | S   | S   | S   | S | S | S | S |
| 14.0609767 | Birmingham | UK | lineage4     | S   | S   | S   | S   | S | S | S | S |
| 15.0607990 | Birmingham | UK | LAM          | S   | S   | S   | S   | S | S | S | S |
| 16.0613240 | Birmingham | UK | Delhi        | S   | S   | S   | S   | S | S | S | S |
| 15.0613136 | Birmingham | UK | lineage4     | S   | S   | S   | S   | S | S | S | S |
| 13.0614444 | Birmingham | UK | Tur          | S   | S   | S   | S   | S | S | S | S |
| 14.0604921 | Birmingham | UK | X-type       | S   | S   | S   | S   | S | S | S | S |
| 15.0601684 | Birmingham | UK | Delhi        | S   | S   | S   | S   | S | S | S | S |
| 16.0618470 | Birmingham | UK | Cameroon     | S   | S   | S   | S   | U | S | S | S |
| 16.0601201 | Birmingham | UK | Tur          | S   | S   | S   | S   | S | S | S | S |
| 11.0606202 | Birmingham | UK | Beijing      | S   | S   | S   | S   | S | S | S | S |
| 16.0607953 | Birmingham | UK | lineage4     | S   | S   | S   | S   | S | S | S | S |
| 16.0612693 | Birmingham | UK | Delhi        | S   | S   | S   | S   | S | S | S | S |
| 15.0609392 | Birmingham | UK | EAI          | S   | S   | S   | S   | S | S | S | S |
| 13.0608466 | Birmingham | UK | Delhi        | S   | S   | S   | S   | U | S | U | S |
| 10.0605284 | Birmingham | UK | Beijing      | S   | S   | S   | S   | S | S | S | S |
| 15.0607787 | Birmingham | UK | Delhi        | S   | S   | S   | S   | S | U | S | S |
| 15.0607086 | Birmingham | UK | lineage4     | n/a | S   | S   | S   | R | S | S | S |
| 14.0609503 | Birmingham | UK | X-type       | S   | S   | S   | S   | S | S | S | S |
| 16.0617460 | Birmingham | UK | Haarlem      | S   | S   | S   | n/a | S | S | S | S |
| 13.0613215 | Birmingham | UK | Haarlem      | S   | S   | S   | S   | S | S | S | S |
| 16.0618555 | Birmingham | UK | LAM          | S   | S   | S   | S   | S | S | S | S |
| 13.0607381 | Birmingham | UK | Delhi        | S   | S   | S   | S   | S | S | S | S |
| 15.0607180 | Birmingham | UK | Delhi        | S   | S   | S   | S   | S | S | S | S |
| 15.0607020 | Birmingham | UK | X-type       | S   | S   | S   | S   | S | S | S | S |
| 14.0602107 | Birmingham | UK | Delhi        | S   | S   | S   | S   | U | S | S | S |
| 13.0613392 | Birmingham | UK | lineage4     | R   | S   | S   | S   | R | S | S | S |
| 13.0613485 | Birmingham | UK | X-type       | S   | S   | S   | S   | S | S | S | S |
| 15.0606354 | Birmingham | UK | Delhi        | S   | S   | S   | S   | S | S | S | S |
| 10.0612331 | Birmingham | UK | Delhi        | S   | S   | S   | S   | S | S | S | S |
| 16.0601962 | Birmingham | UK | Haarlem      | S   | S   | S   | S   | R | S | S | F |
| 13.0607380 | Birmingham | UK | lineage4     | R   | R   | S   | n/a | R | R | R | U |
| 11.0600990 | Birmingham | UK | lineage4     | S   | S   | S   | S   | U | S | S | S |
| 16.0605670 | Birmingham | UK | Haarlem      | S   | S   | S   | S   | S | S | S | S |
| 13.0602845 | Birmingham | UK | Cameroon     | S   | S   | S   | S   | S | S | S | S |
| 16.0618605 | Birmingham | UK | LAM          | S   | S   | S   | S   | S | S | S | S |
| 13.0604532 | Birmingham | UK | Delhi        | S   | S   | S   | S   | S | S | S | S |
| 13.0611318 | Birmingham | UK | lineage4     | S   | S   | S   | S   | S | S | S | S |
| 13.0613052 | Birmingham | UK | lineage4     | S   | S   | S   | S   | S | S | S | S |
| 15.0601748 | Birmingham | UK | Delhi        | S   | S   | S   | S   | S | S | S | S |
| 14.0600942 | Birmingham | UK | X-type       | S   | S   | S   | S   | S | S | S | S |
| 13.0610349 | Birmingham | UK | lineage4     | S   | S   | S   | S   | S | S | S | S |
| 13.0613254 | Birmingham | UK | lineage4     | S   | S   | S   | S   | S | S | S | S |
| 15.0601751 | Birmingham | UK | Beijing      | S   | S   | S   | S   | S | S | S | S |
| 13.0613278 | Birmingham | UK | Beijing      | S   | S   | S   | S   | S | S | S | S |
| 15.0601906 | Birmingham | UK | lineage4     | R   | S   | S   | S   | R | S | S | S |
| 16.0601752 | Birmingham | UK |              | S   | S   | S   | S   | F | F | F | F |
| 12.0615206 | Birmingham | UK | EAI          | S   | S   | S   | S   | S | S | S | S |
| 15.0607480 | Birmingham | UK | Haarlem      | S   | S   | S   | S   | F | S | S | F |
| 14.0602480 | Birmingham | UK | Delhi        | S   | S   | S   | S   | S | S | S | S |
| 15.0601742 | Birmingham | UK | lineage4     | S   | S   | S   | S   | S | S | S | S |
| 13.0610346 | Birmingham | UK | Delhi        | S   | S   | S   | S   | S | S | S | S |
| 13.0609466 | Birmingham | UK | EAI          | S   | S   | S   | S   | S | S | S | S |
| 13.0604064 | Birmingham | UK | lineage4     | S   | S   | S   | S   | S | S | S | S |
| 15.0605124 | Birmingham | UK | EAI          | R   | n/a | S   | S   | R | R | U | S |
| 14.0609182 | Birmingham | UK | Delhi        | S   | S   | S   | S   | S | S | S | S |
| 13.0607137 | Birmingham | UK | EAI          | S   | S   | S   | S   | F | S | S | S |
| 16.0607813 | Birmingham | UK | lineage4     | S   | S   | S   | S   | S | S | S | S |
| 14.0609876 | Birmingham | UK | LAM          | S   | S   | S   | S   | S | S | S | S |
| 15.0607173 | Birmingham | UK | Uganda       | R   | S   | S   | S   | R | S | S | S |
| 12.0601810 | Birmingham | UK | EAI          | S   | S   | S   | S   | R | S | S | S |
| 12.0616935 | Birmingham | UK | lineage4     | S   | S   | S   | S   | S | S | S | S |
| 13.0617089 | Birmingham | UK | Beijing      | R   | R   | R   | n/a | R | R | R | U |
| 17.0601018 | Birmingham | UK | Haarlem      | S   | S   | S   | S   | S | S | S | S |
| 16.0601687 | Birmingham | UK | Delhi        | S   | S   | S   | S   | S | S | S | S |
| 15.0608693 | Birmingham | UK | LAM          | S   | S   | S   | S   | S | S | S | S |
| 15.0601317 | Birmingham | UK | lineage4     | S   | S   | S   | S   | S | F | S | S |
| 14.0600904 | Birmingham | UK | lineage4     | S   | S   | S   | S   | S | S | S | S |
| 14.0609462 | Birmingham | UK |              | S   | S   | S   | S   | S | S | S | S |
| 12.0617275 | Birmingham | UK | Delhi        | S   | S   | S   | S   | S | S | S | S |
| 16.0601953 | Birmingham | UK | M. bovis     | S   | S   | S   | R   | S | S | S | R |
| 14.0609776 | Birmingham | UK | lineage4     | S   | S   | S   | S   | U | S | S | S |
| 13.0604567 | Birmingham | UK | EAI          | S   | S   | S   | S   | S | S | S | S |
| 15.0601961 | Birmingham | UK | EAI          | n/a | n/a | n/a | S   | R | S | S | S |
| 14.0609640 | Birmingham | UK | Cameroon     | S   | S   | S   | S   | S | U | S | S |











|            |            |    |              |     |     |     |     |   |   |   |   |
|------------|------------|----|--------------|-----|-----|-----|-----|---|---|---|---|
| 13.0614577 | Birmingham | UK | EAI          | S   | S   | S   | S   | S | S | S | S |
| 16.0601565 | Birmingham | UK | EAI          | S   | S   | S   | S   | S | S | S | S |
| 13.0613385 | Birmingham | UK | Delhi        | S   | S   | S   | S   | S | S | S | S |
| 14.0609893 | Birmingham | UK | lineage4     | S   | S   | S   | S   | S | S | S | S |
| 15.0607228 | Birmingham | UK | Delhi        | S   | S   | S   | S   | S | S | S | S |
| 14.0607266 | Birmingham | UK | Delhi        | S   | S   | S   | S   | S | S | S | S |
| 13.0608435 | Birmingham | UK | LAM          | S   | S   | S   | S   | S | S | S | S |
| 12.0614865 | Birmingham | UK | X-type       | S   | S   | S   | S   | S | S | S | S |
| 13.0603129 | Birmingham | UK | EAI          | S   | S   | S   | S   | S | S | S | S |
| 15.0607424 | Birmingham | UK | Tur          | S   | S   | S   | S   | S | F | S | S |
| 12.0616801 | Birmingham | UK | LAM          | S   | S   | S   | S   | S | S | S | S |
| 12.0614223 | Birmingham | UK | EAI          | S   | S   | S   | S   | S | U | S | S |
| 15.0601251 | Birmingham | UK | Haarlem      | S   | S   | S   | S   | S | S | S | S |
| 12.0605156 | Birmingham | UK | Beijing      | S   | S   | S   | S   | S | S | S | S |
| 12.0608436 | Birmingham | UK | Delhi        | S   | S   | S   | S   | S | S | S | S |
| 15.0601292 | Birmingham | UK | Haarlem      | S   | S   | S   | S   | S | S | S | S |
| 15.0607441 | Birmingham | UK | Delhi        | S   | S   | S   | S   | S | S | S | S |
| 16.0618267 | Birmingham | UK | S-type       | S   | S   | S   | S   | S | S | S | S |
| 14.0616145 | Birmingham | UK | Beijing      | S   | S   | S   | S   | S | S | S | S |
| 14.0612015 | Birmingham | UK | lineage4     | S   | S   | S   | S   | F | S | S | S |
| 13.0613472 | Birmingham | UK | Cameroon     | S   | S   | S   | S   | S | S | S | S |
| 16.0601785 | Birmingham | UK | lineage4     | S   | S   | S   | S   | S | S | S | S |
| 16.0607158 | Birmingham | UK | Delhi        | S   | S   | S   | S   | S | S | U | S |
| 13.0611322 | Birmingham | UK | lineage4     | S   | S   | S   | S   | S | S | S | S |
| 14.0602863 | Birmingham | UK | Delhi        | S   | S   | S   | S   | S | S | S | S |
| 15.0611433 | Birmingham | UK | Beijing      | R   | R   | R   | n/a | R | R | R | R |
| 13.0613490 | Birmingham | UK | X-type       | S   | S   | S   | S   | S | S | S | S |
| 16.0618577 | Birmingham | UK | Beijing      | S   | S   | S   | S   | S | S | S | S |
| 16.0617189 | Birmingham | UK | lineage4     | S   | S   | S   | S   | S | S | S | S |
| 15.0601313 | Birmingham | UK | Haarlem      | R   | S   | S   | S   | R | S | R | S |
| 14.0613749 | Birmingham | UK | EAI          | S   | S   | S   | S   | U | S | S | S |
| 13.0601230 | Birmingham | UK | Cameroon     | S   | S   | S   | S   | S | S | S | S |
| 15.0601151 | Birmingham | UK | lineage4     | S   | S   | S   | S   | S | S | S | S |
| 13.0610327 | Birmingham | UK | Beijing      | S   | S   | S   | S   | S | S | S | S |
| 13.0613586 | Birmingham | UK | Delhi        | S   | S   | S   | S   | S | S | U | S |
| 16.0601430 | Birmingham | UK | Delhi        | S   | S   | S   | S   | S | S | S | S |
| 16.0607717 | Birmingham | UK | Beijing      | S   | S   | S   | S   | F | S | S | F |
| 16.0611544 | Birmingham | UK | Cameroon     | S   | S   | S   | S   | S | S | S | S |
| 12.0607008 | Birmingham | UK | Delhi        | S   | S   | S   | S   | S | S | S | S |
| 13.0613509 | Birmingham | UK | Delhi        | S   | S   | S   | R   | S | S | S | R |
| 12.0614091 | Birmingham | UK | Tur          | S   | S   | S   | S   | S | S | S | S |
| 13.0611297 | Birmingham | UK | lineage4     | S   | S   | S   | S   | S | S | S | S |
| 15.0605888 | Birmingham | UK | LAM          | S   | S   | S   | S   | S | S | S | S |
| 16.0601667 | Birmingham | UK | Delhi        | S   | S   | S   | S   | S | S | S | S |
| 15.0607389 | Birmingham | UK | lineage4     | S   | S   | S   | S   | S | S | S | S |
| 15.0613466 | Birmingham | UK | LAM          | S   | S   | S   | S   | S | U | U | S |
| 15.0607836 | Birmingham | UK | EAI          | S   | S   | S   | S   | S | S | S | S |
| 11.0614563 | Birmingham | UK | West Africar | S   | S   | S   | S   | S | S | U | S |
| 13.0607393 | Birmingham | UK | Delhi        | S   | S   | S   | S   | S | S | S | S |
| 13.0605714 | Birmingham | UK | lineage4     | S   | S   | S   | S   | S | S | S | S |
| 15.0601454 | Birmingham | UK | Delhi        | S   | S   | S   | S   | S | S | S | S |
| 15.0607568 | Birmingham | UK | Delhi        | S   | S   | S   | S   | S | S | S | S |
| 14.0609170 | Birmingham | UK | Delhi        | S   | S   | S   | S   | S | S | S | S |
| 13.0603087 | Birmingham | UK | Delhi        | R   | S   | S   | S   | R | S | S | S |
| 12.0612520 | Birmingham | UK | lineage4     | S   | S   | S   | S   | S | S | S | S |
| 13.0613544 | Birmingham | UK | Delhi        | S   | S   | S   | S   | U | S | S | S |
| 13.0604897 | Birmingham | UK | EAI          | S   | S   | S   | S   | S | S | U | S |
| 15.0601228 | Birmingham | UK | Haarlem      | S   | S   | S   | S   | S | S | S | S |
| 17.0601233 | Birmingham | UK | Haarlem      | n/a | n/a | n/a | S   | S | S | S | S |
| 15.0604955 | Birmingham | UK | Cameroon     | S   | S   | S   | S   | S | S | S | S |
| 13.0609003 | Birmingham | UK | EAI          | S   | S   | S   | S   | S | S | S | S |
| 16.0617363 | Birmingham | UK | lineage4     | S   | S   | S   | S   | S | S | S | S |
| 16.0618282 | Birmingham | UK | EAI          | S   | S   | S   | S   | S | F | S | S |
| 14.0609509 | Birmingham | UK | EAI          | S   | S   | S   | S   | S | S | S | S |
| 14.0600301 | Birmingham | UK | Tur          | S   | S   | S   | S   | S | S | S | S |
| 14.0600068 | Birmingham | UK | Uganda       | S   | S   | S   | S   | S | S | S | S |
| 16.0601666 | Birmingham | UK | lineage4     | R   | R   | R   | n/a | R | R | R | F |
| 16.0601133 | Birmingham | UK | Delhi        | S   | S   | S   | S   | S | S | U | S |
| 16.0605889 | Birmingham | UK | Haarlem      | S   | S   | S   | S   | S | S | S | S |
| 16.0601963 | Birmingham | UK | Haarlem      | S   | S   | S   | S   | S | S | S | S |
| 13.0613206 | Birmingham | UK | lineage4     | S   | S   | S   | S   | S | S | S | S |
| 16.0601901 | Birmingham | UK | Delhi        | S   | S   | S   | S   | S | F | S | S |
| 13.0603154 | Birmingham | UK | LAM          | S   | S   | S   | S   | S | S | S | S |
| 16.0614420 | Birmingham | UK | Delhi        | S   | S   | S   | S   | S | S | S | S |
| 12.0611897 | Birmingham | UK | Delhi        | S   | S   | S   | S   | S | S | S | S |
| 16.0618621 | Birmingham | UK | Delhi        | S   | S   | S   | n/a | S | S | U | S |
| 12.0613195 | Birmingham | UK | Delhi        | S   | S   | S   | S   | S | S | S | S |
| 15.0601963 | Birmingham | UK | Delhi        | S   | S   | S   | S   | S | S | S | S |
| 14.0600815 | Birmingham | UK | lineage4     | R   | S   | S   | S   | R | S | S | S |
| 14.0600174 | Birmingham | UK | EAI          | S   | S   | S   | S   | S | S | S | S |
| 14.0600303 | Birmingham | UK | Haarlem      | S   | S   | S   | S   | S | S | S | S |
| 16.0611291 | Birmingham | UK | lineage4     | S   | S   | S   | S   | S | S | S | S |
| 14.0604808 | Birmingham | UK | Delhi        | S   | S   | S   | S   | S | S | S | S |
| 14.0613802 | Birmingham | UK | lineage4     | S   | S   | S   | S   | S | S | S | S |
| 16.0608644 | Birmingham | UK | LAM          | S   | S   | S   | S   | S | S | S | S |
| 14.0606215 | Birmingham | UK | Delhi        | S   | S   | S   | S   | S | S | S | S |
| 12.0607547 | Birmingham | UK | Delhi        | S   | S   | S   | S   | S | S | S | S |
| 13.0613111 | Birmingham | UK | Delhi        | S   | S   | S   | S   | S | S | S | S |
| 17.0601252 | Birmingham | UK | Delhi        | S   | S   | S   | S   | S | S | S | S |
| 16.0601231 | Birmingham | UK | Beijing      | S   | S   | S   | S   | S | S | S | S |
| 13.0609458 | Birmingham | UK | LAM          | S   | S   | S   | S   | S | S | S | S |
| 15.0605349 | Birmingham | UK | EAI          | R   | n/a | S   | S   | R | R | U | S |
| 17.0601220 | Birmingham | UK | Delhi        | S   | S   | S   | S   | S | S | S | S |
| 12.0611179 | Birmingham | UK | Beijing      | S   | S   | S   | S   | S | S | S | S |
| 15.0601910 | Birmingham | UK | Delhi        | S   | S   | S   | S   | S | S | U | S |
| 16.0607979 | Birmingham | UK | Delhi        | S   | S   | S   | S   | S | S | S | S |
| 16.0607117 | Birmingham | UK | Delhi        | S   | S   | S   | S   | S | S | F | S |
| 14.0600708 | Birmingham | UK | Delhi        | S   | S   | S   | S   | S | S | S | S |
| 13.0610493 | Birmingham | UK | Delhi        | S   | S   | S   | S   | S | S | S | S |
| 14.0616146 | Birmingham | UK | Beijing      | R   | R   | R   | n/a | R | R | R | R |
| 15.0607243 | Birmingham | UK | Delhi        | S   | S   | S   | S   | S | S | S | S |
| 12.0927951 | Birmingham | UK | LAM          | S   | S   | S   | S   | S | S | S | S |
| 15.0607089 | Birmingham | UK | EAI          | S   | S   | S   | S   | S | S | S | S |
| 14.0600736 | Birmingham | UK | Cameroon     | S   | S   | S   | S   | S | S | S | S |
| 16.0601247 | Birmingham | UK | Delhi        | S   | S   | S   | S   | S | S | S | S |
| 16.0613570 | Birmingham | UK | Haarlem      | S   | S   | S   | S   | S | S | S | S |
| 15.0607969 | Birmingham | UK | M. bovis     | S   | S   | S   | R   | S | S | S | R |
| 14.0609773 | Birmingham | UK | Delhi        | S   | S   | S   | S   | S | S | S | S |
| 14.0608174 | Birmingham | UK | Delhi        | S   | S   | S   | S   | S | R | S | S |
| 11.0614843 | Birmingham | UK | EAI          | S   | S   | S   | n/a | S | S | S | S |
| 14.0600893 | Birmingham | UK | EAI          | S   | S   | S   | S   | S | S | S | S |
| 14.0609957 | Birmingham | UK | Delhi        | S   | S   | S   | S   | S | S | S | S |
| 15.0603618 | Birmingham | UK | Haarlem      | S   | S   | S   | S   | S | S | U | S |
| 15.0607522 | Birmingham | UK | EAI          | S   | S   | S   | S   | S | F | S | S |
| 14.0610264 | Birmingham | UK | Delhi        | S   | S   | S   | S   | S | S | S | S |
| 12.0615221 | Birmingham | UK | EAI          | S   | S   | S   | S   | F | S | S | S |







|            |            |    |              |     |     |     |     |   |   |   |   |
|------------|------------|----|--------------|-----|-----|-----|-----|---|---|---|---|
| 16.0601750 | Birmingham | UK | Delhi        | S   | S   | S   | S   | S | S | S | S |
| 13.0610930 | Birmingham | UK | Haarlem      | S   | S   | S   | S   | S | S | S | S |
| 15.0607794 | Birmingham | UK | Beijing      | S   | S   | S   | S   | S | R | S | S |
| 15.0613049 | Birmingham | UK | Delhi        | S   | S   | S   | S   | S | U | S | S |
| 14.0612496 | Birmingham | UK | LAM          | S   | S   | S   | S   | S | S | S | S |
| 16.0607380 | Birmingham | UK | lineage4     | S   | S   | S   | S   | S | S | S | S |
| 12.0611992 | Birmingham | UK | Delhi        | S   | S   | S   | S   | S | S | U | S |
| 16.0607611 | Birmingham | UK | Delhi        | S   | S   | S   | S   | S | S | S | S |
| 14.0609320 | Birmingham | UK | X-type       | S   | S   | S   | S   | S | S | S | F |
| 15.0601515 | Birmingham | UK | EAI          | S   | S   | S   | S   | U | S | S | S |
| 15.0606997 | Birmingham | UK | Delhi        | S   | S   | S   | S   | S | S | S | S |
| 14.0600155 | Birmingham | UK | Haarlem      | S   | S   | S   | S   | S | S | U | S |
| 15.0607805 | Birmingham | UK | Delhi        | S   | S   | S   | S   | S | S | S | S |
| 13.0604890 | Birmingham | UK | lineage4     | S   | S   | S   | S   | S | S | S | S |
| 16.0601189 | Birmingham | UK | EAI          | S   | S   | S   | S   | S | S | S | S |
| 15.0607874 | Birmingham | UK | Delhi        | R   | S   | S   | S   | R | S | S | S |
| 15.0602613 | Birmingham | UK | Ural         | R   | S   | S   | n/a | R | S | S | S |
| 13.0600608 | Birmingham | UK | Ural         | S   | S   | S   | S   | S | S | S | S |
| 12.0615291 | Birmingham | UK | Delhi        | S   | S   | S   | S   | F | S | S | S |
| 12.0610314 | Birmingham | UK | Delhi        | S   | S   | S   | S   | S | S | S | S |
| 16.0607367 | Birmingham | UK | Haarlem      | S   | S   | S   | S   | S | S | S | S |
| 17.0600112 | Birmingham | UK | Delhi        | S   | S   | S   | S   | S | S | S | S |
| 15.0607083 | Birmingham | UK | Beijing      | S   | S   | S   | S   | S | S | S | S |
| 16.0605632 | Birmingham | UK | Delhi        | S   | S   | S   | S   | S | S | S | S |
| 13.0603151 | Birmingham | UK | Delhi        | S   | S   | S   | S   | F | S | S | S |
| 15.0607438 | Birmingham | UK | Delhi        | S   | S   | S   | S   | S | S | S | S |
| 12.0611591 | Birmingham | UK | Haarlem      | S   | S   | S   | S   | S | S | U | S |
| 15.0607503 | Birmingham | UK | lineage4     | S   | S   | S   | S   | S | S | U | S |
| 15.0607074 | Birmingham | UK | Delhi        | S   | S   | S   | S   | S | S | S | S |
| 15.0607353 | Birmingham | UK | Delhi        | S   | S   | S   | S   | S | S | S | S |
| 16.0611790 | Birmingham | UK | X-type       | S   | S   | S   | S   | S | F | S | S |
| 14.0600986 | Birmingham | UK | X-type       | S   | S   | S   | S   | S | S | S | S |
| 16.0607989 | Birmingham | UK | Delhi        | R   | R   | S   | S   | R | R | S | S |
| 16.0601515 | Birmingham | UK | lineage4     | S   | S   | S   | S   | S | S | S | S |
| 13.0600255 | Birmingham | UK | Cameroon     | S   | S   | S   | S   | S | S | S | S |
| 16.0601606 | Birmingham | UK | S-type       | S   | S   | S   | S   | S | S | S | S |
| 13.0612462 | Birmingham | UK | LAM          | S   | S   | S   | S   | S | S | S | S |
| 13.0600572 | Birmingham | UK | Delhi        | S   | S   | S   | S   | S | S | S | S |
| 15.0613389 | Birmingham | UK | Haarlem      | S   | S   | S   | S   | S | S | U | S |
| 15.0613333 | Birmingham | UK | lineage4     | S   | S   | S   | S   | S | S | U | S |
| 14.0603754 | Birmingham | UK | Delhi        | S   | S   | S   | S   | S | S | S | S |
| 13.0602587 | Birmingham | UK | Delhi        | S   | S   | S   | S   | S | S | U | S |
| 15.0610391 | Birmingham | UK | Delhi        | R   | S   | S   | S   | R | S | S | S |
| 16.0618387 | Birmingham | UK | Delhi        | S   | S   | S   | S   | S | S | S | S |
| 16.0607888 | Birmingham | UK | LAM          | S   | S   | S   | S   | S | S | S | S |
| 13.0604513 | Birmingham | UK | Tur          | S   | S   | S   | S   | S | S | S | S |
| 15.0601391 | Birmingham | UK | Delhi        | S   | S   | S   | S   | S | S | S | S |
| 16.0601418 | Birmingham | UK | LAM          | n/a | n/a | n/a | S   | S | S | S | S |
| 16.0601487 | Birmingham | UK | M. bovis     | S   | S   | S   | R   | S | S | S | R |
| 15.0613462 | Birmingham | UK | Delhi        | S   | S   | S   | S   | S | S | S | S |
| 16.0601668 | Birmingham | UK | Beijing      | R   | S   | R   | S   | R | S | R | S |
| 13.0615676 | Birmingham | UK | EAI          | S   | S   | S   | S   | S | S | S | S |
| 16.0607991 | Birmingham | UK | EAI          | S   | S   | S   | S   | S | S | S | S |
| 15.0601490 | Birmingham | UK | lineage4     | S   | S   | S   | S   | S | S | S | S |
| 16.0601751 | Birmingham | UK | EAI          | S   | S   | S   | n/a | S | S | S | S |
| 14.0609961 | Birmingham | UK | Haarlem      | S   | S   | S   | S   | S | S | S | S |
| 14.0600713 | Birmingham | UK | lineage4     | R   | S   | S   | S   | R | S | S | S |
| 14.0609079 | Birmingham | UK | lineage4     | S   | S   | S   | S   | S | S | S | S |
| 14.0600341 | Birmingham | UK | Haarlem      | S   | S   | S   | S   | S | S | U | S |
| 14.0600980 | Birmingham | UK | Beijing      | R   | R   | S   | R   | R | R | R | R |
| 15.0601178 | Birmingham | UK | Haarlem      | S   | S   | S   | S   | S | S | S | S |
| 16.0606071 | Birmingham | UK | Tur          | S   | S   | S   | S   | S | S | S | S |
| 09.0600851 | Birmingham | UK | Delhi        | S   | S   | S   | S   | S | S | S | S |
| 14.0600348 | Birmingham | UK | LAM          | S   | S   | S   | S   | S | S | S | S |
| 15.0601747 | Birmingham | UK | EAI          | S   | S   | S   | S   | S | S | S | S |
| 14.0609148 | Birmingham | UK | Haarlem      | S   | S   | S   | S   | S | S | S | S |
| 14.0617134 | Birmingham | UK | Delhi        | S   | S   | S   | S   | S | S | S | S |
| 13.0615873 | Birmingham | UK | lineage4     | S   | S   | S   | S   | S | S | S | S |
| 11.0607519 | Birmingham | UK | Delhi        | S   | S   | S   | S   | U | S | S | S |
| 16.0601077 | Birmingham | UK | Delhi        | S   | S   | S   | S   | S | S | S | S |
| 15.0603414 | Birmingham | UK | Delhi        | S   | S   | S   | S   | S | S | S | S |
| 16.0618186 | Birmingham | UK | Delhi        | R   | R   | S   | S   | R | R | R | S |
| 15.0614167 | Birmingham | UK | Haarlem      | S   | S   | S   | S   | S | S | S | S |
| 15.0603042 | Birmingham | UK | EAI          | S   | S   | S   | S   | S | S | S | S |
| 17.0601150 | Birmingham | UK | lineage4     | S   | S   | S   | S   | S | S | S | S |
| 16.0607577 | Birmingham | UK | Beijing      | S   | S   | S   | S   | S | S | S | S |
| 12.0603488 | Birmingham | UK | EAI          | S   | S   | S   | S   | S | S | S | S |
| 15.0601464 | Birmingham | UK | LAM          | S   | S   | S   | S   | S | S | U | S |
| 15.0601087 | Birmingham | UK | lineage4     | S   | S   | S   | S   | S | S | S | S |
| 12.0611245 | Birmingham | UK | lineage4     | S   | S   | S   | S   | S | S | S | S |
| 13.0610998 | Birmingham | UK | LAM          | S   | S   | S   | S   | S | S | S | S |
| 15.0609599 | Birmingham | UK | EAI          | S   | S   | S   | S   | S | S | S | S |
| 12.0615222 | Birmingham | UK | Delhi        | S   | S   | S   | S   | S | S | S | S |
| 16.0604350 | Birmingham | UK | S-type       | S   | S   | S   | S   | S | S | S | S |
| 15.0601902 | Birmingham | UK | EAI          | S   | S   | S   | S   | S | S | S | S |
| 14.0617333 | Birmingham | UK | X-type       | S   | S   | S   | S   | S | S | S | S |
| 16.0601433 | Birmingham | UK | Cameroon     | S   | S   | S   | S   | S | S | S | S |
| 16.0606072 | Birmingham | UK | Cameroon     | S   | S   | S   | S   | S | S | S | S |
| 16.0601738 | Birmingham | UK | Ural         | R   | S   | S   | S   | R | S | S | S |
| 14.0600320 | Birmingham | UK | Delhi        | S   | S   | S   | S   | S | S | S | S |
| 14.0610986 | Birmingham | UK | Delhi        | S   | S   | S   | S   | S | S | U | S |
| 12.0611854 | Birmingham | UK | LAM          | S   | S   | S   | S   | S | S | S | S |
| 14.0603920 | Birmingham | UK | Beijing      | R   | R   | R   | S   | R | R | R | U |
| 16.0608817 | Birmingham | UK | Beijing      | S   | S   | S   | S   | S | S | S | S |
| 16.0601203 | Birmingham | UK | S-type       | S   | S   | S   | S   | S | S | S | S |
| 15.0607721 | Birmingham | UK | X-type       | S   | S   | S   | S   | S | S | S | S |
| 15.0609621 | Birmingham | UK | Delhi        | S   | S   | S   | S   | U | S | S | S |
| 16.0609467 | Birmingham | UK | Delhi        | S   | S   | S   | S   | S | S | S | S |
| 16.0607021 | Birmingham | UK | Cameroon     | S   | S   | S   | S   | S | S | S | S |
| 13.0603086 | Birmingham | UK | Delhi        | S   | S   | S   | S   | S | S | S | S |
| 13.0605666 | Birmingham | UK | West Africar | S   | S   | S   | S   | S | S | U | S |
| 13.0604549 | Birmingham | UK | LAM          | S   | S   | S   | S   | S | S | S | S |
| 14.0606539 | Birmingham | UK | LAM          | S   | S   | S   | S   | S | S | S | S |
| 13.0607143 | Birmingham | UK | Delhi        | S   | S   | S   | S   | S | S | S | S |
| 13.0615934 | Birmingham | UK | Cameroon     | S   | S   | S   | S   | S | S | S | S |
| 14.0609500 | Birmingham | UK | LAM          | S   | S   | S   | S   | S | S | S | S |
| 15.0607031 | Birmingham | UK | lineage4     | S   | S   | S   | S   | S | S | S | S |
| 15.0611576 | Birmingham | UK | lineage4     | S   | S   | S   | S   | S | S | S | S |
| 13.0612178 | Birmingham | UK | Delhi        | S   | S   | S   | S   | S | S | S | S |
| 14.0610315 | Birmingham | UK | Delhi        | S   | S   | S   | S   | S | S | S | S |
| 15.0601806 | Birmingham | UK | Delhi        | S   | S   | S   | n/a | S | S | S | S |
| 14.0608099 | Birmingham | UK | Delhi        | S   | S   | S   | S   | S | S | S | S |
| 15.0613555 | Birmingham | UK | Delhi        | S   | S   | S   | S   | S | S | S | S |
| 16.0608342 | Birmingham | UK | Beijing      | n/a | n/a | S   | S   | R | R | S | R |
| 13.0613460 | Birmingham | UK | Haarlem      | S   | S   | S   | S   | S | S | S | S |
| 16.0617188 | Birmingham | UK | Delhi        | S   | S   | S   | S   | U | S | U | S |





|            |            |    |              |     |     |     |     |   |   |   |   |
|------------|------------|----|--------------|-----|-----|-----|-----|---|---|---|---|
| 16.0618611 | Birmingham | UK | Delhi        | S   | S   | S   | S   | S | S | S | S |
| 15.0607053 | Birmingham | UK | LAM          | S   | S   | S   | S   | S | S | S | S |
| 12.0608996 | Birmingham | UK | Delhi        | S   | S   | S   | S   | S | S | S | S |
| 16.0603633 | Birmingham | UK | X-type       | S   | S   | S   | S   | S | S | S | S |
| 13.0609851 | Birmingham | UK | lineage4     | S   | S   | S   | S   | S | S | S | S |
| 12.0612506 | Birmingham | UK | S-type       | S   | S   | S   | S   | S | S | S | S |
| 14.0600029 | Birmingham | UK | lineage4     | S   | S   | S   | S   | S | S | S | S |
| 14.0600698 | Birmingham | UK | S-type       | S   | S   | S   | S   | S | S | U | S |
| 16.0617531 | Birmingham | UK | Delhi        | S   | S   | S   | S   | S | S | S | S |
| 16.0618429 | Birmingham | UK | X-type       | S   | S   | S   | S   | S | S | S | S |
| 15.0601367 | Birmingham | UK | EAI          | S   | S   | S   | S   | S | S | S | S |
| 14.0610446 | Birmingham | UK | Delhi        | S   | S   | S   | S   | S | S | S | S |
| 15.0600510 | Birmingham | UK | LAM          | S   | S   | S   | S   | S | S | S | S |
| 12.0927854 | Birmingham | UK | LAM          | S   | S   | S   | S   | S | S | S | S |
| 13.0611009 | Birmingham | UK | Delhi        | S   | S   | S   | S   | S | S | S | S |
| 15.0611920 | Birmingham | UK | lineage4     | S   | S   | S   | S   | S | S | S | S |
| 15.0601914 | Birmingham | UK | Haarlem      | S   | S   | S   | S   | S | S | U | S |
| 12.0927024 | Birmingham | UK | lineage4     | S   | S   | S   | S   | S | S | S | S |
| 12.0611788 | Birmingham | UK | Delhi        | S   | S   | S   | S   | S | S | S | S |
| 13.0613521 | Birmingham | UK | lineage4     | S   | S   | S   | S   | S | S | U | S |
| 16.0618193 | Birmingham | UK | Delhi        | S   | S   | S   | S   | S | S | S | S |
| 16.0601070 | Birmingham | UK | lineage4     | S   | S   | S   | S   | S | S | S | S |
| 15.0601745 | Birmingham | UK | lineage4     | R   | S   | S   | S   | F | F | F | F |
| 16.0617146 | Birmingham | UK | Haarlem      | S   | S   | S   | S   | S | S | S | S |
| 13.0609429 | Birmingham | UK | Delhi        | S   | S   | S   | S   | S | S | S | S |
| 14.0615561 | Birmingham | UK | Delhi        | S   | S   | S   | n/a | S | S | S | S |
| 14.0600604 | Birmingham | UK | X-type       | S   | S   | S   | S   | S | S | S | S |
| 10.0607622 | Birmingham | UK | EAI          | S   | S   | S   | S   | S | S | S | S |
| 15.0607700 | Birmingham | UK | LAM          | S   | S   | S   | S   | F | S | S | S |
| 13.0613502 | Birmingham | UK | LAM          | S   | S   | S   | S   | S | S | S | S |
| 11.0601003 | Birmingham | UK | Delhi        | S   | S   | S   | S   | S | S | S | S |
| 16.0607382 | Birmingham | UK | X-type       | S   | S   | S   | S   | S | S | S | S |
| 13.0616419 | Birmingham | UK | EAI          | S   | S   | S   | S   | S | S | S | S |
| 12.0614543 | Birmingham | UK | lineage4     | S   | S   | S   | S   | S | S | U | S |
| 13.0607977 | Birmingham | UK | Delhi        | S   | S   | S   | S   | S | S | S | S |
| 12.0613614 | Birmingham | UK | lineage4     | S   | S   | S   | S   | S | S | U | S |
| 13.0602840 | Birmingham | UK | lineage4     | S   | S   | S   | S   | S | S | S | S |
| 15.0607504 | Birmingham | UK | Delhi        | S   | S   | S   | S   | S | S | S | S |
| 15.0601363 | Birmingham | UK | Delhi        | S   | S   | S   | S   | S | S | S | S |
| 15.0613217 | Birmingham | UK | S-type       | S   | S   | S   | S   | S | S | S | S |
| 15.0607497 | Birmingham | UK | Delhi        | S   | S   | S   | S   | S | S | S | S |
| 15.0601033 | Birmingham | UK | LAM          | R   | S   | S   | S   | R | S | S | U |
| 15.0601889 | Birmingham | UK | LAM          | S   | S   | S   | S   | S | S | S | S |
| 13.0606701 | Birmingham | UK | EAI          | S   | S   | S   | S   | S | S | S | S |
| 14.0603858 | Birmingham | UK | Delhi        | S   | S   | S   | S   | S | S | S | S |
| 16.0601327 | Birmingham | UK | Delhi        | S   | S   | S   | S   | S | S | S | S |
| 16.0601974 | Birmingham | UK | Delhi        | S   | S   | S   | S   | S | S | S | S |
| 14.0609455 | Birmingham | UK | Haarlem      | S   | S   | S   | S   | S | S | S | S |
| 16.0601980 | Birmingham | UK | lineage4     | S   | S   | S   | S   | S | F | S | S |
| 15.0607326 | Birmingham | UK | lineage4     | S   | S   | S   | S   | S | S | S | S |
| 12.0617313 | Birmingham | UK | S-type       | S   | S   | S   | S   | S | S | S | S |
| 15.0601032 | Birmingham | UK | Delhi        | S   | S   | S   | S   | S | S | S | S |
| 12.0612555 | Birmingham | UK | West Africar | S   | S   | S   | S   | S | U | U | S |
| 16.0618624 | Birmingham | UK | Delhi        | n/a | S   | S   | n/a | S | S | S | S |
| 15.0607238 | Birmingham | UK | Delhi        | S   | S   | S   | S   | S | S | S | S |
| 17.0601226 | Birmingham | UK | Delhi        | S   | S   | S   | S   | S | F | S | S |
| 16.0617291 | Birmingham | UK | M. bovis     | S   | S   | S   | R   | S | S | S | R |
| 15.0609387 | Birmingham | UK | LAM          | S   | S   | S   | S   | S | S | S | S |
| 13.0603097 | Birmingham | UK | LAM          | S   | S   | S   | S   | S | S | S | F |
| 16.0607046 | Birmingham | UK | Delhi        | n/a | S   | n/a | S   | R | S | U | S |
| 13.0606213 | Birmingham | UK | Beijing      | S   | S   | S   | S   | S | S | S | S |
| 15.0613043 | Birmingham | UK | S-type       | S   | S   | S   | S   | S | S | S | S |
| 15.0607494 | Birmingham | UK | Delhi        | S   | S   | S   | S   | S | S | S | S |
| 15.0613336 | Birmingham | UK | LAM          | S   | S   | S   | S   | S | S | S | S |
| 14.0601935 | Birmingham | UK | lineage4     | S   | S   | S   | S   | S | S | S | S |
| 13.0605770 | Birmingham | UK | lineage4     | S   | S   | S   | S   | S | S | S | S |
| 16.0607519 | Birmingham | UK | Beijing      | S   | S   | S   | S   | S | S | U | S |
| 13.0612115 | Birmingham | UK | Delhi        | S   | S   | S   | S   | S | S | S | S |
| 12.0611454 | Birmingham | UK | S-type       | S   | S   | S   | S   | S | S | S | R |
| 13.0610491 | Birmingham | UK | Tur          | S   | S   | S   | S   | S | S | S | S |
| 16.0607017 | Birmingham | UK | Delhi        | S   | S   | S   | S   | S | S | S | S |
| 14.0600521 | Birmingham | UK | Beijing      | n/a | n/a | n/a | S   | S | S | S | S |
| 14.0600537 | Birmingham | UK | Delhi        | S   | S   | S   | S   | S | S | S | S |
| 15.0604342 | Birmingham | UK | lineage4     | S   | S   | S   | S   | S | S | S | S |
| 15.0613195 | Birmingham | UK | lineage4     | S   | S   | S   | S   | S | S | S | S |
| 14.0609004 | Birmingham | UK | lineage4     | S   | S   | S   | S   | S | S | S | R |
| 16.0603017 | Birmingham | UK | Delhi        | S   | S   | S   | S   | S | S | S | S |
| 16.0601439 | Birmingham | UK | Ghana        | R   | S   | S   | S   | R | S | S | S |
| 12.0616622 | Birmingham | UK | lineage4     | S   | S   | S   | S   | S | S | S | S |
| 14.0616168 | Birmingham | UK | lineage4     | S   | S   | S   | S   | S | S | S | S |
| 15.0607865 | Birmingham | UK | X-type       | S   | S   | S   | S   | S | S | S | S |
| 16.0601538 | Birmingham | UK | Delhi        | S   | S   | S   | S   | S | S | S | S |
| 14.0600807 | Birmingham | UK | LAM          | S   | S   | S   | S   | S | S | S | S |
| 12.0612525 | Birmingham | UK | EAI          | S   | S   | S   | S   | S | S | U | S |
| 14.0614425 | Birmingham | UK | Beijing      | S   | S   | S   | S   | S | S | S | S |
| 15.0608520 | Birmingham | UK | X-type       | S   | S   | S   | n/a | S | S | S | R |
| 11.0602681 | Birmingham | UK | Delhi        | S   | S   | S   | S   | S | S | S | S |
| 11.0612547 | Birmingham | UK | S-type       | S   | S   | S   | S   | S | S | S | S |
| 14.0609114 | Birmingham | UK | lineage4     | S   | S   | S   | S   | S | S | U | S |
| 16.0601250 | Birmingham | UK | Haarlem      | R   | S   | S   | S   | R | S | R | S |
| 12.0616631 | Birmingham | UK | Haarlem      | S   | S   | S   | S   | S | S | S | S |
| 16.0601658 | Birmingham | UK | lineage4     | S   | S   | S   | S   | U | S | S | S |
| 12.0614963 | Birmingham | UK | lineage4     | S   | S   | S   | S   | S | S | S | S |
| 14.0609008 | Birmingham | UK | lineage4     | S   | S   | S   | n/a | S | S | S | S |
| 11.0615660 | Birmingham | UK | Delhi        | S   | S   | S   | S   | S | S | S | S |
| 16.0601304 | Birmingham | UK | Delhi        | S   | S   | S   | S   | S | S | S | S |
| 15.0602532 | Birmingham | UK | Haarlem      | R   | S   | S   | S   | R | S | S | S |
| 14.0600783 | Birmingham | UK | Haarlem      | S   | S   | S   | S   | S | S | S | S |
| 14.0600803 | Birmingham | UK | EAI          | S   | S   | S   | S   | S | S | S | S |
| 12.0927480 | Birmingham | UK | Delhi        | S   | S   | S   | S   | S | S | U | S |
| 14.0612233 | Birmingham | UK | EAI          | S   | S   | S   | S   | S | S | U | S |
| 15.0607106 | Birmingham | UK | EAI          | S   | S   | S   | S   | S | S | S | S |
| 14.0600568 | Birmingham | UK | LAM          | S   | S   | S   | S   | S | S | S | S |
| 12.0616918 | Birmingham | UK | Delhi        | S   | S   | S   | S   | S | S | U | S |
| 15.0601824 | Birmingham | UK | Delhi        | S   | S   | S   | S   | S | S | S | S |
| 13.0608728 | Birmingham | UK | Delhi        | n/a | n/a | n/a | S   | S | S | S | S |
| 16.0607212 | Birmingham | UK | Delhi        | S   | S   | S   | S   | S | F | F | S |
| 16.0618385 | Birmingham | UK | Delhi        | S   | S   | S   | n/a | F | F | U | S |
| 12.0613605 | Birmingham | UK | West Africar | S   | S   | S   | S   | S | U | U | S |
| 14.0600933 | Birmingham | UK | EAI          | S   | S   | S   | S   | S | S | S | S |
| 15.0600918 | Birmingham | UK | X-type       | S   | S   | S   | S   | S | S | S | S |
| 16.0601766 | Birmingham | UK | LAM          | S   | S   | S   | S   | S | S | S | S |
| 15.0607741 | Birmingham | UK | lineage4     | R   | R   | S   | R   | R | R | R | R |
| 12.0610882 | Birmingham | UK | X-type       | S   | S   | S   | S   | U | S | S | S |
| 14.0600597 | Birmingham | UK | Delhi        | S   | S   | S   | S   | S | S | S | S |
| 16.0607152 | Birmingham | UK | Beijing      | R   | R   | n/a | S   | R | R | R | S |







|            |            |    |           |     |     |     |     |   |   |   |   |
|------------|------------|----|-----------|-----|-----|-----|-----|---|---|---|---|
| 13.0607717 | Birmingham | UK | Haarlem   | S   | S   | S   | S   | S | S | U | S |
| 16.0601190 | Birmingham | UK | Delhi     | S   | S   | S   | S   | S | S | S | S |
| 12.0614204 | Birmingham | UK | lineage4  | S   | S   | S   | S   | S | S | S | S |
| 15.0601871 | Birmingham | UK | lineage4  | S   | S   | S   | S   | S | S | S | S |
| 13.0602075 | Birmingham | UK | Delhi     | S   | S   | S   | S   | S | S | S | S |
| 16.0601046 | Birmingham | UK | LAM       | S   | S   | S   | S   | S | S | S | S |
| 14.0600970 | Birmingham | UK | EAI       | S   | S   | S   | S   | S | S | S | S |
| 13.0607959 | Birmingham | UK | EAI       | S   | S   | S   | S   | S | S | S | S |
| 15.0607778 | Birmingham | UK | lineage4  | S   | S   | S   | S   | S | S | S | S |
| 14.0600566 | Birmingham | UK | Delhi     | S   | S   | S   | S   | S | S | S | S |
| 14.0600788 | Birmingham | UK | Delhi     | S   | S   | S   | S   | S | S | S | S |
| 14.0609149 | Birmingham | UK | lineage4  | S   | S   | S   | S   | S | S | S | S |
| 16.0604778 | Birmingham | UK | Delhi     | S   | S   | S   | S   | S | R | S | S |
| 15.0601597 | Birmingham | UK | lineage4  | S   | S   | S   | S   | S | S | S | S |
| 13.0604889 | Birmingham | UK | Delhi     | S   | S   | S   | S   | S | S | S | S |
| 16.0607766 | Birmingham | UK | M. orygis | S   | S   | S   | S   | S | S | S | S |
| 15.0607140 | Birmingham | UK | Haarlem   | S   | S   | S   | S   | S | S | S | S |
| 17.0601058 | Birmingham | UK | Delhi     | S   | S   | S   | S   | S | S | S | S |
| 15.0607298 | Birmingham | UK | Delhi     | S   | S   | S   | S   | S | S | U | S |
| 16.0601922 | Birmingham | UK | Delhi     | R   | S   | S   | S   | R | S | S | S |
| 14.0600259 | Birmingham | UK | EAI       | S   | S   | S   | S   | S | S | U | S |
| 15.0613282 | Birmingham | UK | Delhi     | S   | S   | S   | S   | S | S | S | S |
| 15.0606897 | Birmingham | UK | Cameroon  | S   | S   | S   | S   | S | S | S | S |
| 14.0600802 | Birmingham | UK | LAM       | S   | S   | S   | S   | S | S | S | S |
| 11.0604393 | Birmingham | UK | M. bovis  | S   | S   | S   | R   | S | S | U | R |
| 13.0610746 | Birmingham | UK | Delhi     | S   | S   | S   | S   | S | S | S | S |
| 13.0611884 | Birmingham | UK | LAM       | S   | S   | S   | S   | S | S | S | S |
| 15.0601833 | Birmingham | UK | LAM       | S   | S   | S   | S   | S | S | S | S |
| 14.0600692 | Birmingham | UK | S-type    | S   | S   | S   | S   | S | S | S | S |
| 09.0602214 | Birmingham | UK | Beijing   | S   | S   | S   | S   | S | S | S | S |
| 15.0607446 | Birmingham | UK | LAM       | S   | S   | S   | S   | S | S | S | S |
| 13.0606481 | Birmingham | UK | lineage4  | S   | S   | S   | S   | S | S | S | S |
| 09.0600998 | Birmingham | UK | Delhi     | S   | S   | S   | S   | S | S | U | S |
| 16.0607570 | Birmingham | UK | X-type    | S   | S   | S   | S   | S | S | U | S |
| 14.0606979 | Birmingham | UK | Beijing   | n/a | n/a | n/a | S   | R | F | R | S |
| 16.0611103 | Birmingham | UK | lineage4  | S   | S   | S   | S   | S | S | S | S |
| 13.0605713 | Birmingham | UK | Delhi     | S   | S   | S   | S   | S | S | S | S |
| 12.0615273 | Birmingham | UK | EAI       | S   | S   | S   | S   | S | S | U | S |
| 13.0600614 | Birmingham | UK | LAM       | S   | S   | S   | S   | S | S | U | S |
| 13.0613605 | Birmingham | UK | Delhi     | S   | S   | S   | S   | S | S | S | S |
| 15.0601457 | Birmingham | UK | EAI       | S   | S   | n/a | S   | S | S | S | S |
| 13.0609970 | Birmingham | UK | Delhi     | S   | S   | S   | S   | S | S | S | S |
| 12.0615237 | Birmingham | UK | Delhi     | S   | S   | S   | S   | S | S | S | S |
| 17.0601028 | Birmingham | UK | Delhi     | S   | S   | S   | n/a | S | S | S | S |
| 12.0610321 | Birmingham | UK | EAI       | S   | S   | S   | S   | S | S | S | S |
| 14.0609538 | Birmingham | UK | Delhi     | S   | S   | S   | S   | S | S | S | S |
| 14.0609546 | Birmingham | UK | Delhi     | S   | S   | S   | S   | S | S | S | S |
| 11.0614819 | Birmingham | UK | Delhi     | S   | S   | S   | S   | S | S | S | S |
| 14.0609727 | Birmingham | UK | Delhi     | S   | S   | S   | S   | S | S | S | S |
| 13.0604065 | Birmingham | UK | LAM       | S   | S   | S   | S   | S | S | S | S |
| 14.0609402 | Birmingham | UK | EAI       | S   | S   | S   | S   | S | S | S | S |
| 13.0611312 | Birmingham | UK | lineage4  | S   | S   | S   | S   | S | S | S | S |
| 16.0601463 | Birmingham | UK | X-type    | S   | S   | S   | S   | S | S | S | S |
| 14.0616130 | Birmingham | UK | EAI       | S   | S   | S   | S   | S | S | S | S |
| 14.0614975 | Birmingham | UK | Delhi     | R   | S   | S   | S   | R | S | S | S |
| 12.0613586 | Birmingham | UK | LAM       | S   | S   | S   | S   | S | S | S | S |
| 13.0610905 | Birmingham | UK | lineage4  | S   | S   | S   | S   | S | S | S | S |
| 14.0600022 | Birmingham | UK | Delhi     | S   | S   | S   | S   | S | S | S | S |
| 14.0616019 | Birmingham | UK | lineage4  | S   | S   | S   | S   | S | S | S | S |
| 16.0601118 | Birmingham | UK | Beijing   | S   | S   | S   | S   | S | S | S | S |
| 09.0600120 | Birmingham | UK | lineage4  | S   | S   | S   | S   | S | S | S | S |
| 12.0617129 | Birmingham | UK | lineage4  | S   | S   | S   | S   | S | S | U | S |
| 12.0612858 | Birmingham | UK | EAI       | S   | S   | S   | S   | S | S | S | S |
| 16.0617216 | Birmingham | UK | Delhi     | S   | S   | S   | S   | S | S | S | S |
| 15.0611783 | Birmingham | UK | Haarlem   | S   | S   | S   | S   | S | S | S | S |
| 09.0604962 | Birmingham | UK | EAI       | R   | S   | S   | S   | R | S | S | S |
| 15.0614226 | Birmingham | UK | Delhi     | S   | S   | S   | S   | S | S | S | S |
| 15.0601694 | Birmingham | UK | Delhi     | S   | S   | S   | S   | S | S | S | S |
| 12.0608968 | Birmingham | UK | Delhi     | S   | S   | S   | S   | S | S | S | S |
| 14.0609027 | Birmingham | UK | Haarlem   | S   | S   | S   | S   | S | S | S | S |
| 15.0607678 | Birmingham | UK | Delhi     | S   | S   | S   | S   | S | S | S | S |
| 15.0607388 | Birmingham | UK | Delhi     | S   | S   | S   | S   | F | S | S | S |
| 15.0613052 | Birmingham | UK | Delhi     | S   | S   | S   | S   | S | S | S | S |
| 14.0604927 | Birmingham | UK | Delhi     | S   | S   | S   | S   | S | S | S | S |
| 16.0601967 | Birmingham | UK | lineage4  | n/a | n/a | n/a | S   | S | S | S | S |
| 14.0613979 | Birmingham | UK | Delhi     | S   | S   | S   | S   | S | S | S | S |
| 13.0611291 | Birmingham | UK | Delhi     | S   | S   | S   | S   | S | S | S | S |
| 15.0607409 | Birmingham | UK | Delhi     | S   | S   | S   | S   | S | U | S | F |
| 13.0612513 | Birmingham | UK | S-type    | S   | S   | S   | S   | S | S | S | S |
| 14.0609903 | Birmingham | UK | Delhi     | S   | S   | S   | S   | S | S | S | S |
| 16.0618469 | Birmingham | UK | EAI       | S   | S   | S   | S   | S | S | S | S |
| 13.0603425 | Birmingham | UK | EAI       | R   | S   | S   | S   | R | S | S | S |
| 14.0609854 | Birmingham | UK | Delhi     | S   | S   | S   | S   | S | S | S | S |
| 12.0927646 | Birmingham | UK | lineage4  | R   | S   | S   | S   | R | S | S | S |
| 13.0611316 | Birmingham | UK | Delhi     | R   | S   | S   | S   | R | S | S | S |
| 15.0607745 | Birmingham | UK | LAM       | R   | R   | R   | R   | R | R | R | U |
| 13.0613458 | Birmingham | UK | Delhi     | S   | S   | S   | S   | S | S | S | S |
| 15.0601542 | Birmingham | UK | Delhi     | S   | S   | S   | S   | S | S | S | S |
| 15.0613506 | Birmingham | UK | Delhi     | S   | S   | S   | S   | S | S | S | S |
| 13.0609498 | Birmingham | UK | EAI       | S   | S   | S   | S   | S | S | S | S |
| 15.0601607 | Birmingham | UK | Haarlem   | S   | S   | S   | S   | S | S | S | S |
| 15.0601876 | Birmingham | UK | Delhi     | R   | R   | S   | S   | R | R | S | S |
| 15.0615367 | Birmingham | UK | Delhi     | S   | S   | S   | S   | S | S | S | S |
| 16.0603276 | Birmingham | UK | Beijing   | S   | S   | S   | S   | S | S | S | S |
| 15.0607254 | Birmingham | UK | lineage4  | S   | S   | S   | S   | S | S | S | S |
| 14.0600273 | Birmingham | UK | EAI       | S   | S   | S   | S   | S | S | S | S |
| 16.0618329 | Birmingham | UK | Ural      | S   | S   | S   | S   | S | S | S | S |
| 13.0609069 | Birmingham | UK | lineage4  | S   | S   | S   | S   | S | S | S | S |
| 10.0605084 | Birmingham | UK | EAI       | S   | S   | S   | S   | U | S | S | S |
| 16.0601224 | Birmingham | UK | X-type    | R   | S   | S   | S   | R | S | S | S |
| 15.0607511 | Birmingham | UK | LAM       | S   | S   | S   | S   | S | S | S | S |
| 10.0611022 | Birmingham | UK | Delhi     | S   | S   | S   | S   | S | S | S | S |
| 13.0601556 | Birmingham | UK | Delhi     | S   | S   | S   | S   | S | S | S | S |
| 16.0601593 | Birmingham | UK | lineage4  | S   | S   | S   | S   | S | S | S | S |
| 14.0600014 | Birmingham | UK | Delhi     | S   | S   | S   | S   | S | S | S | S |
| 14.0609976 | Birmingham | UK | LAM       | S   | S   | S   | S   | S | F | S | S |
| 16.0604915 | Birmingham | UK | Beijing   | R   | R   | S   | n/a | R | R | S | F |
| 11.0611394 | Birmingham | UK | Delhi     | S   | S   | S   | S   | S | S | S | S |
| 13.0605101 | Birmingham | UK | Delhi     | S   | S   | S   | S   | S | S | S | S |
| 16.0607436 | Birmingham | UK | Haarlem   | S   | S   | S   | S   | S | S | S | S |
| 13.0606112 | Birmingham | UK | Haarlem   | S   | S   | S   | S   | S | S | S | S |
| 14.0609261 | Birmingham | UK | lineage4  | S   | S   | S   | S   | S | S | S | S |
| 15.0601450 | Birmingham | UK | lineage4  | S   | S   | S   | S   | S | S | S | S |
| 14.0609534 | Birmingham | UK | Delhi     | S   | S   | S   | S   | S | S | S | S |
| 14.0600675 | Birmingham | UK | X-type    | S   | S   | S   | S   | S | S | U | S |
| 16.0618092 | Birmingham | UK | Delhi     | S   | S   | S   | S   | S | F | S | S |













|            |            |    |              |     |     |     |     |   |   |   |   |
|------------|------------|----|--------------|-----|-----|-----|-----|---|---|---|---|
| 16.0618082 | Birmingham | UK | Delhi        | S   | S   | S   | S   | S | S | S | S |
| 13.0610489 | Birmingham | UK | West Africar | S   | S   | S   | S   | S | S | S | U |
| 14.0600801 | Birmingham | UK | Beijing      | S   | S   | S   | n/a | S | S | S | S |
| 12.0601948 | Birmingham | UK | S-type       | S   | S   | S   | S   | S | S | S | S |
| 16.0607004 | Birmingham | UK | lineage4     | S   | S   | S   | S   | S | S | S | S |
| 12.0611810 | Birmingham | UK | lineage4     | S   | S   | S   | S   | S | S | S | S |
| 13.0608467 | Birmingham | UK | Delhi        | R   | S   | S   | S   | R | S | S | S |
| 14.0600796 | Birmingham | UK | Haarlem      | S   | S   | S   | S   | S | S | S | S |
| 13.0609467 | Birmingham | UK | Delhi        | S   | S   | S   | S   | U | S | S | S |
| 14.0609526 | Birmingham | UK | Delhi        | S   | S   | S   | S   | S | S | S | S |
| 14.0600789 | Birmingham | UK | Delhi        | R   | S   | S   | S   | R | S | S | S |
| 13.0607148 | Birmingham | UK | Delhi        | R   | S   | S   | S   | R | S | S | S |
| 11.0610105 | Birmingham | UK | Delhi        | S   | S   | S   | S   | S | S | S | S |
| 13.0602613 | Birmingham | UK | Cameroon     | S   | S   | S   | S   | S | S | S | S |
| 16.0605229 | Birmingham | UK | Delhi        | S   | S   | S   | S   | S | S | S | S |
| 7627736    | Leeds      | UK | Beijing      | S   | S   | S   | S   | S | S | S | U |
| 7620040    | Leeds      | UK | Delhi        | S   | S   | S   | S   | S | S | S | U |
| 7620018    | Leeds      | UK | LAM          | S   | S   | S   | S   | S | S | S | U |
| 7627124    | Leeds      | UK | Delhi        | S   | S   | S   | S   | S | S | S | U |
| 7627400    | Leeds      | UK | lineage4     | S   | S   | S   | S   | S | S | S | U |
| 7626694    | Leeds      | UK | Delhi        | S   | S   | S   | S   | S | S | S | F |
| 7626571    | Leeds      | UK | EAI          | S   | S   | S   | S   | F | F | S | F |
| 7627900    | Leeds      | UK | Delhi        | S   | S   | S   | S   | S | S | S | U |
| 7628147    | Leeds      | UK | EAI          | S   | S   | S   | S   | S | F | F | S |
| 7626930    | Leeds      | UK | Beijing      | R   | R   | R   | R   | R | R | R | R |
| 7626833    | Leeds      | UK | Delhi        | S   | S   | S   | S   | S | S | S | F |
| 7628121    | Leeds      | UK | Delhi        | S   | S   | S   | S   | S | S | S | U |
| 7620062    | Leeds      | UK | X-type       | S   | S   | S   | S   | S | S | S | U |
| 7628143    | Leeds      | UK | Haarlem      | S   | S   | S   | S   | S | S | S | S |
| 7626675    | Leeds      | UK | Beijing      | R   | R   | R   | R   | R | R | R | R |
| 7626725    | Leeds      | UK | Beijing      | S   | S   | S   | S   | S | S | S | S |
| 7627574    | Leeds      | UK | Delhi        | S   | S   | S   | S   | S | S | S | U |
| 7626555    | Leeds      | UK | Delhi        | S   | S   | S   | S   | S | S | S | U |
| 7620149    | Leeds      | UK | Delhi        | S   | S   | S   | S   | S | S | S | S |
| 7626433    | Leeds      | UK | lineage4     | S   | S   | S   | S   | S | F | F | S |
| 7627886    | Leeds      | UK | Cameroon     | S   | S   | S   | S   | U | S | U | S |
| 7620009    | Leeds      | UK | Delhi        | S   | S   | S   | S   | S | S | S | U |
| 7627572    | Leeds      | UK | Delhi        | S   | S   | S   | S   | S | S | S | S |
| 7627226    | Leeds      | UK | Beijing      | R   | R   | R   | R   | R | R | R | R |
| 7626487    | Leeds      | UK | Delhi        | S   | S   | S   | S   | S | S | S | S |
| 7627636    | Leeds      | UK | Haarlem      | S   | S   | S   | S   | S | S | U | F |
| 7627434    | Leeds      | UK | Delhi        | S   | S   | S   | S   | U | S | U | S |
| 7626752    | Leeds      | UK | Delhi        | S   | S   | S   | S   | S | S | F | S |
| 7626878    | Leeds      | UK | lineage4     | S   | S   | S   | S   | S | S | S | S |
| 7627116    | Leeds      | UK | lineage4     | S   | S   | S   | S   | S | S | S | U |
| 7626713    | Leeds      | UK | lineage4     | S   | S   | S   | S   | S | S | S | S |
| H124740138 | London     | UK | Haarlem      | R   | R   | S   | S   | R | R | R | R |
| H141600041 | London     | UK | Beijing      | S   | S   | S   | S   | S | S | S | S |
| H112780034 | London     | UK | Ural         | R   | R   | R   | R   | R | R | U | S |
| H101920168 | London     | UK | Delhi        | R   | R   | n/a | n/a | R | R | R | S |
| H121260031 | London     | UK | Ural         | R   | n/a | S   | S   | R | R | S | S |
| H132740033 | London     | UK | Delhi        | R   | R   | S   | S   | R | R | F | S |
| H12500072  | London     | UK | Delhi        | R   | R   | S   | S   | R | R | U | S |
| H133920162 | London     | UK | Delhi        | R   | R   | n/a | S   | R | R | R | S |
| H142040333 | London     | UK | Beijing      | R   | R   | R   | S   | R | R | R | R |
| H123360011 | London     | UK | Beijing      | R   | R   | n/a | S   | R | R | R | U |
| H120580018 | London     | UK | Delhi        | R   | R   | S   | S   | R | R | R | R |
| H101620117 | London     | UK | EAI          | R   | R   | n/a | S   | R | R | R | R |
| H102500147 | London     | UK | LAM          | R   | R   | n/a | R   | R | R | R | R |
| H135000214 | London     | UK | EAI          | R   | R   | S   | S   | R | R | S | U |
| H103180114 | London     | UK | Delhi        | R   | R   | S   | S   | R | R | S | S |
| H124040080 | London     | UK | Delhi        | R   | S   | S   | S   | R | F | S | S |
| H149800032 | London     | UK | Haarlem      | R   | R   | n/a | n/a | R | R | R | R |
| H134640235 | London     | UK | Tur          | R   | R   | R   | R   | R | R | R | U |
| H102780066 | London     | UK | Cameroon     | R   | R   | S   | S   | R | R | S | S |
| H131820987 | London     | UK | Beijing      | R   | R   | n/a | R   | R | R | R | R |
| H141800023 | London     | UK | Cameroon     | R   | R   | S   | n/a | R | R | S | S |
| H144680079 | London     | UK | S-type       | R   | R   | n/a | S   | R | R | R | S |
| H121320026 | London     | UK | Beijing      | S   | n/a | S   | S   | S | S | S | S |
| H101880206 | London     | UK | EAI          | R   | R   | n/a | S   | R | R | R | R |
| H112140033 | London     | UK | Delhi        | R   | R   | n/a | S   | R | R | R | S |
| H131680029 | London     | UK | Beijing      | R   | R   | n/a | n/a | R | R | R | R |
| H133140029 | London     | UK | lineage4     | R   | R   | n/a | S   | R | R | R | S |
| H114780002 | London     | UK | Ural         | R   | R   | R   | S   | R | R | U | S |
| H122480042 | London     | UK | X-type       | R   | R   | n/a | n/a | R | R | S | R |
| H110340018 | London     | UK | Beijing      | R   | R   | n/a | R   | R | R | U | R |
| H133180021 | London     | UK | Beijing      | R   | R   | n/a | S   | R | R | R | S |
| H115160021 | London     | UK | EAI          | R   | R   | n/a | n/a | S | R | S | S |
| H114920015 | London     | UK | Beijing      | R   | R   | n/a | R   | R | R | R | R |
| H102740017 | London     | UK | Beijing      | R   | R   | n/a | n/a | R | R | S | S |
| H124080087 | London     | UK | Haarlem      | R   | R   | R   | R   | R | R | R | U |
| H102540112 | London     | UK | Beijing      | R   | R   | n/a | R   | R | R | U | R |
| H140820208 | London     | UK | Delhi        | R   | S   | S   | S   | F | S | S | F |
| H105080006 | London     | UK | Beijing      | R   | R   | n/a | R   | R | R | R | R |
| H112980114 | London     | UK | LAM          | R   | R   | n/a | S   | R | R | U | S |
| H140640110 | London     | UK | Beijing      | R   | R   | R   | S   | R | R | R | U |
| H105240002 | London     | UK | Beijing      | R   | R   | n/a | S   | R | R | R | R |
| H114600114 | London     | UK | Beijing      | R   | R   | R   | S   | R | R | R | R |
| H111860011 | London     | UK | Delhi        | R   | R   | S   | S   | R | R | S | R |
| H121040031 | London     | UK | LAM          | R   | R   | S   | R   | R | R | R | S |
| H114440480 | London     | UK | Beijing      | R   | R   | R   | R   | R | R | R | R |
| H140800280 | London     | UK | Beijing      | n/a | R   | S   | S   | R | F | S | S |
| H122800024 | London     | UK | EAI          | R   | R   | S   | S   | R | R | S | R |
| H140820241 | London     | UK | Beijing      | R   | R   | R   | R   | R | R | R | R |
| H132140021 | London     | UK | Beijing      | R   | R   | R   | R   | R | R | R | R |
| H143080030 | London     | UK | EAI          | R   | R   | S   | S   | R | U | S | S |
| H102080138 | London     | UK | Delhi        | R   | R   | n/a | n/a | R | R | R | S |
| H123300022 | London     | UK | Delhi        | R   | R   | n/a | S   | R | R | R | S |
| H130140043 | London     | UK | LAM          | R   | R   | R   | S   | R | R | R | S |
| H121160050 | London     | UK | Beijing      | R   | R   | R   | S   | R | R | U | S |
| H110580062 | London     | UK | Delhi        | R   | n/a | S   | S   | R | R | S | S |
| H130660134 | London     | UK | Beijing      | R   | R   | R   | S   | R | R | R | R |
| H111720040 | London     | UK | Beijing      | S   | S   | S   | S   | S | S | S | S |
| H131080024 | London     | UK | LAM          | R   | n/a | n/a | R   | R | R | R | R |
| H140640101 | London     | UK | Beijing      | R   | R   | R   | R   | R | R | R | U |
| H142440027 | London     | UK | Beijing      | R   | R   | R   | S   | R | R | R | R |
| H131520071 | London     | UK | Delhi        | R   | R   | n/a | n/a | R | R | R | S |
| H114780024 | London     | UK | Beijing      | R   | R   | R   | R   | R | R | F | F |
| H111380011 | London     | UK | EAI          | R   | R   | n/a | R   | R | R | U | R |
| H121380012 | London     | UK | EAI          | R   | R   | n/a | n/a | R | R | S | S |
| H103060020 | London     | UK | Beijing      | R   | R   | S   | S   | R | R | U | S |
| H110560102 | London     | UK | Beijing      | R   | R   | R   | R   | R | R | R | R |
| H120460024 | London     | UK | Beijing      | R   | R   | n/a | n/a | R | R | R | R |
| H121640036 | London     | UK | lineage4     | R   | R   | n/a | S   | R | R | R | S |
| H102060482 | London     | UK | LAM          | R   | R   | S   | S   | R | R | R | U |
| H121340004 | London     | UK | Delhi        | R   | R   | R   | S   | R | R | R | S |

|            |        |    |          |     |     |     |     |   |   |   |
|------------|--------|----|----------|-----|-----|-----|-----|---|---|---|
| H103920462 | London | UK | lineage4 | R   | R   | S   | R   | R | R | R |
| H112600014 | London | UK | Ural     | R   | R   | R   | S   | R | R | R |
| H143340175 | London | UK | Beijing  | R   | R   | R   | R   | R | R | R |
| H130280011 | London | UK | Beijing  | R   | R   | n/a | S   | R | R | U |
| H111840007 | London | UK | Delhi    | R   | R   | S   | S   | R | R | S |
| H113540015 | London | UK | Delhi    | R   | R   | n/a | n/a | R | R | S |
| H143740205 | London | UK | X-type   | n/a | n/a | n/a | S   | R | R | R |
| H111940054 | London | UK | Beijing  | R   | R   | S   | R   | R | R | S |
| H131000008 | London | UK | Delhi    | R   | R   | S   | S   | R | R | S |
| H121320033 | London | UK | EAI      | R   | R   | R   | S   | R | R | S |
| H131560009 | London | UK | Delhi    | R   | R   | S   | S   | R | R | R |
| H120420019 | London | UK | Delhi    | R   | R   | R   | S   | R | R | R |
| H144480021 | London | UK | Beijing  | R   | R   | R   | R   | R | R | R |
| H111560029 | London | UK | Beijing  | R   | R   | S   | S   | R | R | U |
| H112000008 | London | UK | Beijing  | R   | R   | R   | R   | R | R | R |
| H120340011 | London | UK | Beijing  | R   | R   | R   | R   | R | R | R |
| H123200010 | London | UK | Beijing  | R   | R   | n/a | S   | R | R | R |
| H142600033 | London | UK | Delhi    | R   | R   | S   | R   | R | R | F |
| H110540031 | London | UK | EAI      | n/a | R   | R   | S   | R | R | R |
| H110800117 | London | UK | Beijing  | R   | R   | R   | R   | R | R | R |
| H121200024 | London | UK | Delhi    | S   | S   | S   | S   | F | F | U |
| H134920401 | London | UK | X-type   | R   | R   | n/a | R   | F | R | F |
| H102860140 | London | UK | Delhi    | R   | R   | S   | S   | R | R | S |
| H102880194 | London | UK | EAI      | R   | R   | n/a | S   | R | R | R |
| H111560023 | London | UK | Cameroon | R   | R   | S   | S   | R | R | S |
| H141780187 | London | UK | Beijing  | R   | R   | n/a | S   | R | R | U |
| H123320024 | London | UK | Cameroon | R   | R   | n/a | n/a | R | R | S |
| H134780024 | London | UK | Delhi    | R   | n/a | S   | S   | R | R | S |
| H143160013 | London | UK | Beijing  | R   | R   | n/a | S   | R | R | R |
| H112040018 | London | UK | Delhi    | R   | R   | n/a | S   | R | R | U |
| H120720148 | London | UK | LAM      | R   | R   | n/a | R   | R | R | R |
| H113100007 | London | UK | Beijing  | R   | R   | R   | R   | R | R | R |
| H130820016 | London | UK | Beijing  | R   | R   | n/a | R   | R | R | R |
| H110820014 | London | UK | Beijing  | R   | R   | R   | S   | R | R | R |
| H103340621 | London | UK | Beijing  | R   | R   | R   | S   | R | R | R |
| H102960052 | London | UK | Beijing  | R   | R   | S   | R   | R | R | R |
| H114540002 | London | UK | Beijing  | R   | R   | R   | R   | R | R | R |
| H111380213 | London | UK | Beijing  | R   | R   | n/a | S   | R | R | S |
| H102640088 | London | UK | Delhi    | R   | R   | n/a | S   | R | R | S |
| H104480455 | London | UK | lineage4 | R   | R   | n/a | S   | S | R | S |
| H111540011 | London | UK | Ghana    | R   | R   | n/a | n/a | R | R | S |
| H142420003 | London | UK | Ural     | R   | R   | n/a | R   | R | R | U |
| H112440007 | London | UK | Beijing  | R   | R   | n/a | n/a | R | R | R |
| H131220032 | London | UK | Beijing  | R   | R   | n/a | n/a | R | R | R |
| H143480223 | London | UK | Beijing  | R   | R   | R   | R   | R | R | R |
| H143620222 | London | UK | Delhi    | R   | R   | S   | S   | U | S | S |
| H134240034 | London | UK | Beijing  | R   | R   | R   | S   | R | R | S |
| H140300086 | London | UK | LAM      | R   | R   | n/a | S   | R | R | S |
| H122540026 | London | UK | Beijing  | R   | R   | n/a | n/a | R | R | S |
| H121320021 | London | UK | Haarlem  | R   | R   | S   | S   | R | R | S |
| H143180015 | London | UK | Delhi    | R   | S   | S   | S   | R | S | U |
| H102580404 | London | UK | Beijing  | R   | R   | n/a | S   | R | R | S |
| H105160024 | London | UK | Beijing  | R   | R   | n/a | S   | R | R | S |
| H120840306 | London | UK | Beijing  | R   | R   | R   | S   | R | R | S |
| H134900365 | London | UK | EAI      | R   | n/a | S   | S   | R | R | S |
| H132060332 | London | UK | Beijing  | R   | R   | n/a | S   | R | R | R |
| H123680040 | London | UK | Beijing  | R   | R   | n/a | S   | R | R | R |
| H110560002 | London | UK | Beijing  | R   | R   | n/a | R   | R | R | R |
| H122040011 | London | UK | Tur      | R   | R   | R   | R   | R | R | R |
| H133300021 | London | UK | Delhi    | S   | S   | S   | S   | F | S | F |
| H130640097 | London | UK | EAI      | R   | R   | R   | R   | R | R | R |
| H112160033 | London | UK | Delhi    | R   | R   | n/a | S   | R | R | U |
| H131680038 | London | UK | Beijing  | R   | R   | R   | R   | R | R | R |
| H130900010 | London | UK | Delhi    | S   | S   | S   | S   | S | S | F |
| H123720020 | London | UK | Delhi    | R   | R   | n/a | S   | R | R | S |
| H122740073 | London | UK | Beijing  | R   | R   | R   | R   | R | R | R |
| H145040031 | London | UK | Beijing  | R   | R   | n/a | S   | R | R | S |
| H123340049 | London | UK | X-type   | R   | R   | n/a | n/a | R | R | S |
| H123220062 | London | UK | Delhi    | R   | R   | S   | S   | R | R | S |
| H134280018 | London | UK | Delhi    | R   | R   | R   | S   | R | R | S |
| H112240073 | London | UK | Beijing  | R   | R   | n/a | R   | R | R | R |
| H102240043 | London | UK | EAI      | R   | R   | n/a | S   | R | R | R |
| H132480029 | London | UK | Beijing  | R   | R   | n/a | R   | R | R | R |
| H102800105 | London | UK | Delhi    | R   | R   | n/a | n/a | R | R | R |
| H150280020 | London | UK | Tur      | R   | R   | R   | S   | R | R | S |
| H123300023 | London | UK | LAM      | R   | R   | n/a | S   | R | R | S |
| H112560226 | London | UK | Beijing  | R   | R   | R   | S   | R | R | R |
| H142100097 | London | UK | Beijing  | n/a | R   | S   | S   | R | R | S |
| H131680035 | London | UK | Beijing  | R   | R   | R   | S   | R | R | R |
| H120580035 | London | UK | Cameroon | S   | n/a | S   | S   | S | S | S |
| H143100018 | London | UK | Delhi    | R   | R   | n/a | R   | R | R | R |
| H104120008 | London | UK | Beijing  | R   | R   | R   | R   | R | R | R |
| H143780227 | London | UK | EAI      | R   | R   | n/a | S   | R | U | S |
| H133240016 | London | UK | Beijing  | R   | R   | n/a | R   | R | R | R |
| H113140103 | London | UK | Delhi    | R   | R   | n/a | S   | R | R | S |
| H130760079 | London | UK | Beijing  | R   | R   | n/a | R   | R | R | U |
| H144880098 | London | UK | EAI      | R   | R   | S   | S   | R | R | S |
| H122040022 | London | UK | Beijing  | R   | R   | n/a | n/a | R | R | S |
| H113180014 | London | UK | Beijing  | R   | R   | R   | R   | R | R | R |
| H111620021 | London | UK | Beijing  | R   | R   | R   | R   | R | R | R |
| H144320050 | London | UK | Beijing  | R   | R   | R   | S   | R | R | S |
| H102500146 | London | UK | LAM      | R   | R   | n/a | R   | R | R | R |
| H123120211 | London | UK | LAM      | R   | R   | n/a | S   | R | R | S |
| H144300224 | London | UK | Delhi    | R   | R   | S   | S   | R | R | S |
| H125180101 | London | UK | Tur      | R   | R   | S   | S   | R | R | U |
| H112380031 | London | UK | Beijing  | R   | R   | n/a | S   | R | R | R |
| H134980271 | London | UK | Beijing  | R   | R   | n/a | S   | R | R | F |
| H133160689 | London | UK | LAM      | R   | R   | n/a | S   | R | R | S |
| H120660003 | London | UK | Delhi    | R   | R   | n/a | R   | R | R | R |
| H112040005 | London | UK | Haarlem  | R   | R   | S   | S   | R | R | S |
| H113140110 | London | UK | Beijing  | R   | R   | R   | R   | R | R | R |
| H112580018 | London | UK | Beijing  | R   | R   | R   | R   | R | R | R |
| H103460397 | London | UK | EAI      | R   | R   | S   | S   | R | R | S |
| H111520011 | London | UK | lineage4 | R   | R   | S   | S   | R | R | S |
| H130380158 | London | UK | Tur      | R   | R   | S   | R   | R | R | R |
| H111960022 | London | UK | Delhi    | R   | R   | n/a | n/a | R | R | S |
| H143240163 | London | UK | Beijing  | R   | R   | R   | S   | R | R | R |
| H102720013 | London | UK | Beijing  | R   | R   | n/a | R   | R | R | U |
| H143140060 | London | UK | Delhi    | R   | R   | S   | S   | U | R | S |
| H140880224 | London | UK | Delhi    | R   | S   | S   | S   | U | S | S |
| H114620029 | London | UK | Haarlem  | R   | R   | R   | n/a | R | R | R |
| H124820130 | London | UK | Beijing  | R   | R   | n/a | n/a | R | R | R |
| H114980033 | London | UK | Beijing  | R   | R   | n/a | n/a | R | R | R |
| H143480205 | London | UK | Delhi    | R   | R   | S   | S   | R | R | S |
| H145020032 | London | UK | Tur      | R   | R   | R   | S   | R | R | S |
| H120160025 | London | UK | Delhi    | R   | R   | S   | S   | R | R | S |

|            |        |    |          |   |     |     |     |   |   |   |   |
|------------|--------|----|----------|---|-----|-----|-----|---|---|---|---|
| H120640698 | London | UK | Beijing  | R | R   | R   | R   | R | R | R | R |
| H133300002 | London | UK | Beijing  | R | R   | n/a | R   | R | R | R | R |
| H112580012 | London | UK | Delhi    | R | R   | S   | S   | R | R | S | R |
| H102260124 | London | UK | EAI      | R | R   | R   | R   | R | R | R | R |
| H111900036 | London | UK | Cameroon | S | S   | S   | S   | S | S | S | S |
| H131020017 | London | UK | Delhi    | R | R   | n/a | S   | R | R | R | S |
| H120840023 | London | UK | lineage4 | R | R   | n/a | S   | R | R | R | S |
| H114840036 | London | UK | Delhi    | R | R   | S   | S   | R | R | R | R |
| H114360011 | London | UK | LAM      | R | R   | S   | R   | R | R | R | S |
| H101920694 | London | UK | Beijing  | R | R   | R   | R   | R | R | R | U |
| H140260305 | London | UK | Beijing  | R | n/a | n/a | S   | R | R | R | U |
| H114700009 | London | UK | Delhi    | R | R   | S   | S   | R | R | R | S |
| H132540044 | London | UK | lineage4 | R | R   | n/a | n/a | R | R | R | U |
| H104020004 | London | UK | lineage4 | R | R   | R   | R   | R | R | R | R |
| H123460050 | London | UK | Delhi    | R | R   | n/a | R   | R | R | R | R |
| H112880076 | London | UK | EAI      | R | R   | S   | S   | R | R | S | S |
| H113020004 | London | UK | lineage4 | R | R   | n/a | S   | R | R | R | S |
| H123460044 | London | UK | Beijing  | R | R   | R   | S   | R | R | R | R |
| H122020037 | London | UK | Tur      | R | R   | S   | S   | R | R | S | S |
| H102640056 | London | UK | lineage4 | R | R   | n/a | S   | R | R | R | R |
| H114400013 | London | UK | LAM      | R | R   | n/a | S   | R | R | R | R |
| H114740004 | London | UK | Delhi    | R | R   | n/a | S   | R | R | R | R |
| H144400047 | London | UK | EAI      | R | R   | S   | S   | R | R | S | S |
| H111540004 | London | UK | Beijing  | R | R   | n/a | R   | R | R | R | R |
| H112860025 | London | UK | Beijing  | R | R   | R   | S   | R | R | R | R |
| H122860049 | London | UK | LAM      | R | R   | n/a | S   | R | R | R | S |
| H105160152 | London | UK | Cameroon | S | S   | S   | S   | S | S | S | S |
| H131780007 | London | UK | Beijing  | R | R   | S   | S   | R | R | R | R |
| H140300080 | London | UK | LAM      | R | R   | n/a | S   | R | R | R | S |
| H144000191 | London | UK | LAM      | R | R   | n/a | R   | R | R | U | R |
| H124160071 | London | UK | Delhi    | R | R   | n/a | S   | R | R | R | S |
| H110200006 | London | UK | Beijing  | S | n/a | S   | S   | S | S | S | S |
| H133020037 | London | UK | Cameroon | R | R   | n/a | n/a | R | R | S | S |
| H131320020 | London | UK | Beijing  | R | R   | R   | R   | R | R | R | R |
| H110720021 | London | UK | Beijing  | R | R   | R   | R   | R | R | R | R |
| H123660058 | London | UK | X-type   | R | R   | n/a | S   | R | R | R | R |
| H122100024 | London | UK | Tur      | R | R   | S   | S   | R | R | S | S |
| H132560017 | London | UK | Beijing  | R | R   | R   | S   | R | R | R | R |
| H124720152 | London | UK | LAM      | R | R   | R   | S   | R | R | R | R |
| H144800311 | London | UK | Beijing  | R | R   | S   | R   | R | R | R | U |
| H104480049 | London | UK | Beijing  | S | S   | S   | S   | S | S | S | S |
| H130600165 | London | UK | lineage4 | R | R   | n/a | S   | R | R | R | S |
| H104500470 | London | UK | Beijing  | R | R   | R   | R   | R | R | R | R |
| H120800010 | London | UK | Cameroon | R | R   | n/a | S   | R | R | R | U |
| H144720288 | London | UK | S-type   | R | R   | R   | S   | R | R | R | S |
| H143120831 | London | UK | Delhi    | R | R   | S   | R   | R | R | R | R |
| H141860035 | London | UK | Tur      | R | R   | S   | S   | R | R | S | S |
| H130260030 | London | UK | Beijing  | R | R   | R   | R   | R | R | R | R |
| H104840010 | London | UK | Cameroon | R | R   | n/a | S   | R | R | R | S |
| H122660008 | London | UK | Haarlem  | R | R   | R   | S   | R | R | R | S |
| H130560193 | London | UK | Beijing  | R | R   | S   | S   | R | R | R | F |
| H131450076 | London | UK | Beijing  | R | R   | n/a | R   | R | R | R | U |
| H103540353 | London | UK | Beijing  | R | R   | n/a | R   | R | R | R | R |
| H112980113 | London | UK | Beijing  | R | R   | n/a | R   | R | R | R | R |
| H122280029 | London | UK | lineage4 | R | R   | R   | S   | R | R | S | U |
| H112700034 | London | UK | Beijing  | R | R   | R   | S   | R | R | R | R |
| H104560351 | London | UK | Beijing  | R | R   | R   | R   | R | R | R | R |
| H130380145 | London | UK | Beijing  | R | R   | n/a | R   | R | R | R | R |
| H114920016 | London | UK | Beijing  | R | R   | n/a | S   | R | R | R | R |
| H125180095 | London | UK | Cameroon | R | R   | R   | R   | R | R | F | R |
| H132100029 | London | UK | EAI      | R | R   | n/a | S   | R | R | R | S |
| H133600015 | London | UK | Cameroon | R | R   | S   | S   | R | R | S | S |
| H112760022 | London | UK | Delhi    | R | R   | S   | S   | R | R | S | S |
| H101460141 | London | UK | Delhi    | R | R   | n/a | n/a | R | R | R | S |
| H102040119 | London | UK | LAM      | R | R   | n/a | R   | R | R | R | R |
| H144060098 | London | UK | Beijing  | R | R   | R   | S   | R | R | R | R |
| H114240009 | London | UK | Cameroon | S | S   | S   | S   | S | S | S | S |
| H122280030 | London | UK | Haarlem  | R | R   | R   | R   | R | R | R | U |
| H112260025 | London | UK | Beijing  | R | R   | R   | R   | R | R | R | R |
| H150240214 | London | UK | Ural     | R | R   | n/a | R   | R | R | R | R |
| H134560426 | London | UK | Delhi    | R | R   | n/a | R   | R | R | R | R |
| H131740058 | London | UK | EAI      | R | R   | n/a | S   | R | R | R | S |
| H141220064 | London | UK | Beijing  | R | R   | R   | R   | R | R | R | R |
| H133260002 | London | UK | Delhi    | R | n/a | S   | S   | R | R | R | S |
| H115120020 | London | UK | Beijing  | R | R   | R   | R   | R | R | R | R |
| H131440121 | London | UK | Haarlem  | R | R   | n/a | n/a | R | R | U | R |
| H123660062 | London | UK | Delhi    | R | R   | n/a | S   | R | R | R | R |
| H134340142 | London | UK | Delhi    | R | R   | n/a | R   | R | R | R | R |
| H111880072 | London | UK | Beijing  | R | R   | R   | S   | R | R | R | R |
| H122780021 | London | UK | Beijing  | R | R   | R   | R   | R | R | R | R |
| H143880210 | London | UK | Beijing  | R | R   | n/a | S   | R | R | R | R |
| H122020014 | London | UK | Haarlem  | R | R   | S   | S   | R | R | S | S |
| H133700018 | London | UK | lineage4 | R | R   | R   | R   | R | R | R | R |
| H134460397 | London | UK | Beijing  | R | R   | n/a | R   | R | R | R | R |
| H111060034 | London | UK | Beijing  | R | R   | n/a | R   | R | R | R | R |
| H130520152 | London | UK | Beijing  | R | R   | R   | R   | R | R | R | R |
| H134060565 | London | UK | Delhi    | R | R   | R   | S   | R | R | R | S |
| H115180008 | London | UK | Beijing  | R | R   | R   | R   | R | R | R | R |
| H142680039 | London | UK | Beijing  | R | R   | R   | R   | R | R | R | R |
| H133460009 | London | UK | Beijing  | R | R   | n/a | R   | R | R | R | R |
| H121400003 | London | UK | Beijing  | R | R   | R   | R   | R | R | R | R |
| H102060503 | London | UK | Delhi    | R | R   | n/a | S   | R | R | R | S |
| H120320024 | London | UK | EAI      | R | R   | R   | R   | R | R | R | R |
| H103380436 | London | UK | lineage4 | R | R   | R   | R   | R | R | R | R |
| H141480065 | London | UK | Delhi    | R | R   | n/a | S   | R | R | R | R |
| H101480093 | London | UK | Cameroon | R | R   | S   | S   | R | R | S | S |
| H101320216 | London | UK | Beijing  | R | R   | S   | R   | R | R | S | S |
| H142640017 | London | UK | Delhi    | R | R   | R   | S   | R | R | R | R |
| H150140251 | London | UK | Delhi    | R | R   | n/a | S   | R | R | U | U |
| H133740011 | London | UK | Cameroon | R | R   | S   | S   | R | R | S | S |
| H121460028 | London | UK | Delhi    | R | R   | S   | S   | R | R | S | S |
| H142180021 | London | UK | Beijing  | R | R   | S   | S   | R | R | S | S |
| H140120166 | London | UK | Cameroon | R | R   | S   | S   | R | R | S | S |
| H110380009 | London | UK | Ural     | R | R   | S   | S   | R | R | S | S |
| H111100025 | London | UK | Cameroon | S | S   | S   | S   | S | S | S | S |
| H130140042 | London | UK | EAI      | R | R   | R   | S   | R | R | R | S |
| H132340027 | London | UK | Beijing  | R | R   | S   | R   | R | R | R | U |
| H112260020 | London | UK | Beijing  | R | R   | n/a | R   | R | R | U | R |
| H145180186 | London | UK | Delhi    | R | R   | S   | S   | U | S | S | S |
| H143340168 | London | UK | Beijing  | R | R   | S   | S   | R | R | S | R |
| H141960036 | London | UK | Beijing  | R | R   | S   | S   | R | R | S | F |
| H122240093 | London | UK | Beijing  | R | R   | S   | S   | R | R | S | S |
| H102800104 | London | UK | Beijing  | R | R   | n/a | S   | R | R | R | S |
| H131140031 | London | UK | Delhi    | R | R   | S   | S   | R | R | S | S |
| H150280022 | London | UK | LAM      | R | R   | n/a | S   | R | R | U | R |
| H113760006 | London | UK | Delhi    | R | R   | n/a | R   | R | R | R | U |



|        |        |    |         |            |             |   |   |   |   |   |   |   |   |
|--------|--------|----|---------|------------|-------------|---|---|---|---|---|---|---|---|
| H74998 | Oxford | UK | Beijing |            |             | S | S | S | S | S | S | S | S |
| T20779 | Oxford | UK | Delhi   | SRR6367395 | PRJNA393378 | S | S | S | S | S | S | S | S |
| T23882 | Oxford | UK | Delhi   | SRR6339663 | PRJNA393378 | S | S | S | S | U | S | S | F |

# S2

Gene coordinates based on NC\_000962.2, with 100 nucleotide positions upstream of each gene read as well.

Mutations characterised as 'S' in Walker *et al* but as 'R' by another source, were characterised as 'R'.

Insertions and deletions characterise in Walker *et al* were re-computed from that data for this study to ensure that the same version of Cortex was used for both data sets. These indels may therefore differ a little from those published in Walker *et al*.

| Drug       | Mutation        | Details of insertion/deletion | Characterisation | Source                                            |
|------------|-----------------|-------------------------------|------------------|---------------------------------------------------|
| Ethambutol | embA_2723_indel | embA_2723_2724_ins_GGG        | S                | Walker TM et. al., Lancet Infect Dis. 2015 Jun 23 |
| Ethambutol | embA_A1015T     |                               | S                | Walker TM et. al., Lancet Infect Dis. 2015 Jun 23 |
| Ethambutol | embA_A1016S     |                               | S                | Walker TM et. al., Lancet Infect Dis. 2015 Jun 23 |
| Ethambutol | embA_A109T      |                               | S                | Walker TM et. al., Lancet Infect Dis. 2015 Jun 23 |
| Ethambutol | embA_A201T      |                               | S                | Walker TM et. al., Lancet Infect Dis. 2015 Jun 23 |
| Ethambutol | embA_A255V      |                               | S                | Walker TM et. al., Lancet Infect Dis. 2015 Jun 23 |
| Ethambutol | embA_A312V      |                               | S                | Walker TM et. al., Lancet Infect Dis. 2015 Jun 23 |
| Ethambutol | embA_A331P      |                               | S                | Walker TM et. al., Lancet Infect Dis. 2015 Jun 23 |
| Ethambutol | embA_A428V      |                               | S                | Walker TM et. al., Lancet Infect Dis. 2015 Jun 23 |
| Ethambutol | embA_A438V      |                               | S                | Walker TM et. al., Lancet Infect Dis. 2015 Jun 23 |
| Ethambutol | embA_A460T      |                               | S                | Walker TM et. al., Lancet Infect Dis. 2015 Jun 23 |
| Ethambutol | embA_A545P      |                               | S                | Walker TM et. al., Lancet Infect Dis. 2015 Jun 23 |
| Ethambutol | embA_A576T      |                               | S                | Walker TM et. al., Lancet Infect Dis. 2015 Jun 23 |
| Ethambutol | embA_A586T      |                               | S                | Walker TM et. al., Lancet Infect Dis. 2015 Jun 23 |
| Ethambutol | embA_A734T      |                               | S                | Walker TM et. al., Lancet Infect Dis. 2015 Jun 23 |
| Ethambutol | embA_A852S      |                               | S                | Walker TM et. al., Lancet Infect Dis. 2015 Jun 23 |
| Ethambutol | embA_A852V      |                               | S                | Walker TM et. al., Lancet Infect Dis. 2015 Jun 23 |
| Ethambutol | embA_C-12T      |                               | R                | Walker TM et. al., Lancet Infect Dis. 2015 Jun 23 |
| Ethambutol | embA_C-15G      |                               | S                | Walker TM et. al., Lancet Infect Dis. 2015 Jun 23 |
| Ethambutol | embA_C-16G      |                               | R                | Walker TM et. al., Lancet Infect Dis. 2015 Jun 23 |
| Ethambutol | embA_C-16T      |                               | R                | Walker TM et. al., Lancet Infect Dis. 2015 Jun 23 |
| Ethambutol | embA_C-59A      |                               | S                | Walker TM et. al., Lancet Infect Dis. 2015 Jun 23 |
| Ethambutol | embA_C-73T      |                               | S                | Walker TM et. al., Lancet Infect Dis. 2015 Jun 23 |
| Ethambutol | embA_C335W      |                               | S                | Walker TM et. al., Lancet Infect Dis. 2015 Jun 23 |
| Ethambutol | embA_D1053G     |                               | S                | Walker TM et. al., Lancet Infect Dis. 2015 Jun 23 |
| Ethambutol | embA_D176A      |                               | S                | Walker TM et. al., Lancet Infect Dis. 2015 Jun 23 |
| Ethambutol | embA_D678N      |                               | S                | Walker TM et. al., Lancet Infect Dis. 2015 Jun 23 |
| Ethambutol | embA_D761G      |                               | S                | Walker TM et. al., Lancet Infect Dis. 2015 Jun 23 |
| Ethambutol | embA_D784N      |                               | S                | Walker TM et. al., Lancet Infect Dis. 2015 Jun 23 |
| Ethambutol | embA_D865N      |                               | S                | Walker TM et. al., Lancet Infect Dis. 2015 Jun 23 |
| Ethambutol | embA_E7K        |                               | S                | Walker TM et. al., Lancet Infect Dis. 2015 Jun 23 |
| Ethambutol | embA_E951D      |                               | S                | Walker TM et. al., Lancet Infect Dis. 2015 Jun 23 |
| Ethambutol | embA_G-17A      |                               | S                | Walker TM et. al., Lancet Infect Dis. 2015 Jun 23 |
| Ethambutol | embA_G-43C      |                               | S                | Walker TM et. al., Lancet Infect Dis. 2015 Jun 23 |
| Ethambutol | embA_G1085S     |                               | S                | Walker TM et. al., Lancet Infect Dis. 2015 Jun 23 |
| Ethambutol | embA_G154S      |                               | S                | Walker TM et. al., Lancet Infect Dis. 2015 Jun 23 |
| Ethambutol | embA_G157C      |                               | S                | Walker TM et. al., Lancet Infect Dis. 2015 Jun 23 |
| Ethambutol | embA_G21R       |                               | S                | Walker TM et. al., Lancet Infect Dis. 2015 Jun 23 |
| Ethambutol | embA_G352S      |                               | S                | Walker TM et. al., Lancet Infect Dis. 2015 Jun 23 |
| Ethambutol | embA_G596S      |                               | S                | Walker TM et. al., Lancet Infect Dis. 2015 Jun 23 |
| Ethambutol | embA_G884D      |                               | S                | Walker TM et. al., Lancet Infect Dis. 2015 Jun 23 |
| Ethambutol | embA_H665R      |                               | S                | Walker TM et. al., Lancet Infect Dis. 2015 Jun 23 |
| Ethambutol | embA_H665Y      |                               | S                | Walker TM et. al., Lancet Infect Dis. 2015 Jun 23 |
| Ethambutol | embA_H673R      |                               | S                | Walker TM et. al., Lancet Infect Dis. 2015 Jun 23 |
| Ethambutol | embA_I191V      |                               | S                | Walker TM et. al., Lancet Infect Dis. 2015 Jun 23 |
| Ethambutol | embA_I595V      |                               | S                | Walker TM et. al., Lancet Infect Dis. 2015 Jun 23 |
| Ethambutol | embA_K166N      |                               | S                | Walker TM et. al., Lancet Infect Dis. 2015 Jun 23 |
| Ethambutol | embA_K773N      |                               | S                | Walker TM et. al., Lancet Infect Dis. 2015 Jun 23 |
| Ethambutol | embA_L1008P     |                               | S                | Walker TM et. al., Lancet Infect Dis. 2015 Jun 23 |
| Ethambutol | embA_L215M      |                               | S                | Walker TM et. al., Lancet Infect Dis. 2015 Jun 23 |
| Ethambutol | embA_L215P      |                               | S                | Walker TM et. al., Lancet Infect Dis. 2015 Jun 23 |
| Ethambutol | embA_L233M      |                               | S                | Walker TM et. al., Lancet Infect Dis. 2015 Jun 23 |
| Ethambutol | embA_L263F      |                               | S                | Walker TM et. al., Lancet Infect Dis. 2015 Jun 23 |
| Ethambutol | embA_L263P      |                               | S                | Walker TM et. al., Lancet Infect Dis. 2015 Jun 23 |
| Ethambutol | embA_L314P      |                               | S                | Walker TM et. al., Lancet Infect Dis. 2015 Jun 23 |
| Ethambutol | embA_L373P      |                               | S                | Walker TM et. al., Lancet Infect Dis. 2015 Jun 23 |
| Ethambutol | embA_L659F      |                               | S                | Walker TM et. al., Lancet Infect Dis. 2015 Jun 23 |
| Ethambutol | embA_M697V      |                               | S                | Walker TM et. al., Lancet Infect Dis. 2015 Jun 23 |
| Ethambutol | embA_N54S       |                               | S                | Walker TM et. al., Lancet Infect Dis. 2015 Jun 23 |
| Ethambutol | embA_P1094S     |                               | S                | Walker TM et. al., Lancet Infect Dis. 2015 Jun 23 |
| Ethambutol | embA_P327H      |                               | S                | Walker TM et. al., Lancet Infect Dis. 2015 Jun 23 |
| Ethambutol | embA_P327L      |                               | S                | Walker TM et. al., Lancet Infect Dis. 2015 Jun 23 |
| Ethambutol | embA_P35Q       |                               | S                | Walker TM et. al., Lancet Infect Dis. 2015 Jun 23 |
| Ethambutol | embA_P689L      |                               | S                | Walker TM et. al., Lancet Infect Dis. 2015 Jun 23 |
| Ethambutol | embA_P75L       |                               | S                | Walker TM et. al., Lancet Infect Dis. 2015 Jun 23 |
| Ethambutol | embA_P860L      |                               | S                | Walker TM et. al., Lancet Infect Dis. 2015 Jun 23 |
| Ethambutol | embA_P901L      |                               | S                | Walker TM et. al., Lancet Infect Dis. 2015 Jun 23 |
| Ethambutol | embA_Q1004P     |                               | S                | Walker TM et. al., Lancet Infect Dis. 2015 Jun 23 |
| Ethambutol | embA_Q57E       |                               | S                | Walker TM et. al., Lancet Infect Dis. 2015 Jun 23 |
| Ethambutol | embA_R683L      |                               | S                | Walker TM et. al., Lancet Infect Dis. 2015 Jun 23 |
| Ethambutol | embA_S1017A     |                               | S                | Walker TM et. al., Lancet Infect Dis. 2015 Jun 23 |
| Ethambutol | embA_S20A       |                               | S                | Walker TM et. al., Lancet Infect Dis. 2015 Jun 23 |
| Ethambutol | embA_S20P       |                               | S                | Walker TM et. al., Lancet Infect Dis. 2015 Jun 23 |
| Ethambutol | embA_S49R       |                               | S                | Walker TM et. al., Lancet Infect Dis. 2015 Jun 23 |
| Ethambutol | embA_S49T       |                               | S                | Walker TM et. al., Lancet Infect Dis. 2015 Jun 23 |









|            |                                                                                    |                                                  |                     |                                                   |
|------------|------------------------------------------------------------------------------------|--------------------------------------------------|---------------------|---------------------------------------------------|
| Ethambutol | embC_T941A                                                                         |                                                  | S                   | Walker TM et. al., Lancet Infect Dis. 2015 Jun 23 |
| Ethambutol | embC_V218A                                                                         |                                                  | S                   | Walker TM et. al., Lancet Infect Dis. 2015 Jun 23 |
| Ethambutol | embC_V303L                                                                         |                                                  | S                   | Walker TM et. al., Lancet Infect Dis. 2015 Jun 23 |
| Ethambutol | embC_V337I                                                                         |                                                  | S                   | Walker TM et. al., Lancet Infect Dis. 2015 Jun 23 |
| Ethambutol | embC_V363I                                                                         |                                                  | S                   | Walker TM et. al., Lancet Infect Dis. 2015 Jun 23 |
| Isoniazid  | ahpC_-3_indel                                                                      | ahpC_-3_-2_ins_T                                 | S                   | Walker TM et. al., Lancet Infect Dis. 2015 Jun 23 |
| Isoniazid  | ahpC_-34_indel                                                                     | ahpC_-34_-34_del_A                               | S                   | Walker TM et. al., Lancet Infect Dis. 2015 Jun 23 |
| Isoniazid  | ahpC_-400_indel                                                                    | ahpC_-400_588+586_del_GGTGGCCAGCCACACCCCGGGTGTTC | S                   | Walker TM et. al., Lancet Infect Dis. 2015 Jun 23 |
| Isoniazid  | ahpC_213_indel                                                                     | ahpC_213_214_ins_A                               | S                   | Walker TM et. al., Lancet Infect Dis. 2015 Jun 23 |
| Isoniazid  | ahpC_249_indel                                                                     | ahpC_249_249_del_G                               | S                   | Walker TM et. al., Lancet Infect Dis. 2015 Jun 23 |
| Isoniazid  | ahpC_A-80G                                                                         |                                                  | S                   | Walker TM et. al., Lancet Infect Dis. 2015 Jun 23 |
| Isoniazid  | ahpC_A-83G                                                                         |                                                  | S                   | Walker TM et. al., Lancet Infect Dis. 2015 Jun 23 |
| Isoniazid  | ahpC_A-98C                                                                         |                                                  | S                   | Walker TM et. al., Lancet Infect Dis. 2015 Jun 23 |
| Isoniazid  | ahpC_A122T                                                                         |                                                  | S                   | Walker TM et. al., Lancet Infect Dis. 2015 Jun 23 |
| Isoniazid  | ahpC_A187P                                                                         |                                                  | S                   | Walker TM et. al., Lancet Infect Dis. 2015 Jun 23 |
| Isoniazid  | ahpC_A195S                                                                         |                                                  | S                   | Walker TM et. al., Lancet Infect Dis. 2015 Jun 23 |
| Isoniazid  | ahpC_C-52T                                                                         |                                                  | S                   | Walker TM et. al., Lancet Infect Dis. 2015 Jun 23 |
| Isoniazid  | ahpC_C-57T                                                                         |                                                  | R                   | Walker TM et. al., Lancet Infect Dis. 2015 Jun 23 |
| Isoniazid  | ahpC_C-72T                                                                         |                                                  | R                   | Walker TM et. al., Lancet Infect Dis. 2015 Jun 23 |
| Isoniazid  | ahpC_C-79T                                                                         |                                                  | S                   | Walker TM et. al., Lancet Infect Dis. 2015 Jun 23 |
| Isoniazid  | ahpC_C-81T                                                                         |                                                  | S                   | Walker TM et. al., Lancet Infect Dis. 2015 Jun 23 |
| Isoniazid  | ahpC_D182G                                                                         |                                                  | S                   | Walker TM et. al., Lancet Infect Dis. 2015 Jun 23 |
| Isoniazid  | ahpC_E160K                                                                         |                                                  | S                   | Walker TM et. al., Lancet Infect Dis. 2015 Jun 23 |
| Isoniazid  | ahpC_G-48A                                                                         |                                                  | R                   | Walker TM et. al., Lancet Infect Dis. 2015 Jun 23 |
| Isoniazid  | ahpC_G-88A                                                                         |                                                  | S (Phylogenetic SN) | Walker TM et. al., Lancet Infect Dis. 2015 Jun 23 |
| Isoniazid  | ahpC_G45S                                                                          |                                                  | S                   | Walker TM et. al., Lancet Infect Dis. 2015 Jun 23 |
| Isoniazid  | ahpC_K192N                                                                         |                                                  | S                   | Walker TM et. al., Lancet Infect Dis. 2015 Jun 23 |
| Isoniazid  | ahpC_L191F                                                                         |                                                  | S                   | Walker TM et. al., Lancet Infect Dis. 2015 Jun 23 |
| Isoniazid  | ahpC_P44R                                                                          |                                                  | S                   | Walker TM et. al., Lancet Infect Dis. 2015 Jun 23 |
| Isoniazid  | ahpC_P62H                                                                          |                                                  | S                   | Walker TM et. al., Lancet Infect Dis. 2015 Jun 23 |
| Isoniazid  | ahpC_T105M                                                                         |                                                  | S                   | Walker TM et. al., Lancet Infect Dis. 2015 Jun 23 |
| Isoniazid  | ahpC_V158F                                                                         |                                                  | S                   | Walker TM et. al., Lancet Infect Dis. 2015 Jun 23 |
| Isoniazid  | ahpC_Y34C                                                                          |                                                  | S                   | Walker TM et. al., Lancet Infect Dis. 2015 Jun 23 |
| Isoniazid  | ahpC: All synonymous mutations                                                     |                                                  | S                   | Walker TM et. al., Lancet Infect Dis. 2015 Jun 23 |
| Isoniazid  | fabG1_A215T                                                                        |                                                  | R                   | Walker TM et. al., Lancet Infect Dis. 2015 Jun 23 |
| Isoniazid  | fabG1_C-15T                                                                        |                                                  | R                   | Walker TM et. al., Lancet Infect Dis. 2015 Jun 23 |
| Isoniazid  | fabG1_E7K                                                                          |                                                  | S                   | Walker TM et. al., Lancet Infect Dis. 2015 Jun 23 |
| Isoniazid  | fabG1_G-17T                                                                        |                                                  | R                   | Walker TM et. al., Lancet Infect Dis. 2015 Jun 23 |
| Isoniazid  | fabG1_G-47C                                                                        |                                                  | S                   | Walker TM et. al., Lancet Infect Dis. 2015 Jun 23 |
| Isoniazid  | fabG1_G-77A                                                                        |                                                  | S                   | Walker TM et. al., Lancet Infect Dis. 2015 Jun 23 |
| Isoniazid  | fabG1_L203L                                                                        |                                                  | R                   | Walker TM et. al., Lancet Infect Dis. 2015 Jun 23 |
| Isoniazid  | fabG1_N24S                                                                         |                                                  | S                   | Walker TM et. al., Lancet Infect Dis. 2015 Jun 23 |
| Isoniazid  | fabG1_P81A                                                                         |                                                  | S                   | Walker TM et. al., Lancet Infect Dis. 2015 Jun 23 |
| Isoniazid  | fabG1_S126N                                                                        |                                                  | S                   | Walker TM et. al., Lancet Infect Dis. 2015 Jun 23 |
| Isoniazid  | fabG1_T-8C                                                                         |                                                  | R                   | Walker TM et. al., Lancet Infect Dis. 2015 Jun 23 |
| Isoniazid  | fabG1_T4I                                                                          |                                                  | S                   | Walker TM et. al., Lancet Infect Dis. 2015 Jun 23 |
| Isoniazid  | fabG1: All synonymous mutations other than L203L                                   |                                                  | S                   | Walker TM et. al., Lancet Infect Dis. 2015 Jun 23 |
| Isoniazid  | inhA_A-14G                                                                         |                                                  | S                   | Walker TM et. al., Lancet Infect Dis. 2015 Jun 23 |
| Isoniazid  | inhA_C-40T                                                                         |                                                  | S                   | Walker TM et. al., Lancet Infect Dis. 2015 Jun 23 |
| Isoniazid  | inhA_C-67T                                                                         |                                                  | S                   | Walker TM et. al., Lancet Infect Dis. 2015 Jun 23 |
| Isoniazid  | inhA_G141R                                                                         |                                                  | S                   | Walker TM et. al., Lancet Infect Dis. 2015 Jun 23 |
| Isoniazid  | inhA_G183R                                                                         |                                                  | S                   | Walker TM et. al., Lancet Infect Dis. 2015 Jun 23 |
| Isoniazid  | inhA_I194T                                                                         |                                                  | R                   | Walker TM et. al., Lancet Infect Dis. 2015 Jun 23 |
| Isoniazid  | inhA_I21T                                                                          |                                                  | R                   | Walker TM et. al., Lancet Infect Dis. 2015 Jun 23 |
| Isoniazid  | inhA_I228V                                                                         |                                                  | S                   | Walker TM et. al., Lancet Infect Dis. 2015 Jun 23 |
| Isoniazid  | inhA_S94A                                                                          |                                                  | R                   | Walker TM et. al., Lancet Infect Dis. 2015 Jun 23 |
| Isoniazid  | inhA: All synonymous mutations                                                     |                                                  | S                   | Walker TM et. al., Lancet Infect Dis. 2015 Jun 23 |
| Isoniazid  | katG_1286_indel                                                                    | katG_1286_1288_del_CGC                           | R                   | Walker TM et. al., Lancet Infect Dis. 2015 Jun 23 |
| Isoniazid  | katG_1339_indel                                                                    | katG_1339_1350_del_CACGACCTCGTC                  | R                   | Walker TM et. al., Lancet Infect Dis. 2015 Jun 23 |
| Isoniazid  | katG_1365_indel                                                                    | katG_1365_1365_del_T                             | R                   | Walker TM et. al., Lancet Infect Dis. 2015 Jun 23 |
| Isoniazid  | katG_1804_indel                                                                    | katG_1804_1810_del_AACCCGT                       | R                   | Walker TM et. al., Lancet Infect Dis. 2015 Jun 23 |
| Isoniazid  | katG_1900_indel                                                                    | katG_1900_1901_ins_C                             | R                   | Walker TM et. al., Lancet Infect Dis. 2015 Jun 23 |
| Isoniazid  | katG_21_indel                                                                      | katG_21_22_ins_T                                 | R                   | Walker TM et. al., Lancet Infect Dis. 2015 Jun 23 |
| Isoniazid  | katG_371_indel                                                                     | katG_371_371_del_G                               | R                   | Walker TM et. al., Lancet Infect Dis. 2015 Jun 23 |
| Isoniazid  | katG_A-35G                                                                         |                                                  | S                   | Walker TM et. al., Lancet Infect Dis. 2015 Jun 23 |
| Isoniazid  | katG_A109V                                                                         |                                                  | R                   | Walker TM et. al., Lancet Infect Dis. 2015 Jun 23 |
| Isoniazid  | fabG1_C-15T                                                                        |                                                  | R                   | ReSeqTB systematic review                         |
| Isoniazid  | katG_A162V                                                                         |                                                  | S                   | Walker TM et. al., Lancet Infect Dis. 2015 Jun 23 |
| Isoniazid  | katG_A16V                                                                          |                                                  | S                   | Walker TM et. al., Lancet Infect Dis. 2015 Jun 23 |
| Isoniazid  | katG_A281T                                                                         |                                                  | S                   | Walker TM et. al., Lancet Infect Dis. 2015 Jun 23 |
| Isoniazid  | katG_A480S                                                                         |                                                  | S                   | Walker TM et. al., Lancet Infect Dis. 2015 Jun 23 |
| Isoniazid  | katG_A532P                                                                         |                                                  | S                   | Walker TM et. al., Lancet Infect Dis. 2015 Jun 23 |
| Isoniazid  | katG_A551S                                                                         |                                                  | S                   | Walker TM et. al., Lancet Infect Dis. 2015 Jun 23 |
| Isoniazid  | katG_A591T                                                                         |                                                  | S                   | Walker TM et. al., Lancet Infect Dis. 2015 Jun 23 |
| Isoniazid  | katG_A606T                                                                         |                                                  | S                   | Walker TM et. al., Lancet Infect Dis. 2015 Jun 23 |
| Isoniazid  | katG_A614E                                                                         |                                                  | R                   | Walker TM et. al., Lancet Infect Dis. 2015 Jun 23 |
| Isoniazid  | katG_C-79T                                                                         |                                                  | S                   | Walker TM et. al., Lancet Infect Dis. 2015 Jun 23 |
| Isoniazid  | katG_C-85T                                                                         |                                                  | R                   | Walker TM et. al., Lancet Infect Dis. 2015 Jun 23 |
| Isoniazid  | fabG1: Any nucleotide mutation at positions -16, -15 and -8 in the operator region |                                                  | S                   | WHO endorsed line probe assays                    |
| Isoniazid  | katG_D142G                                                                         |                                                  | R                   | Walker TM et. al., Lancet Infect Dis. 2015 Jun 23 |
| Isoniazid  | katG_D194N                                                                         |                                                  | S                   | Walker TM et. al., Lancet Infect Dis. 2015 Jun 23 |

|              |                                |                                                     |                                                   |
|--------------|--------------------------------|-----------------------------------------------------|---------------------------------------------------|
| Isoniazid    | katG_D215E                     | S                                                   | Walker TM et. al., Lancet Infect Dis. 2015 Jun 23 |
| Isoniazid    | katG_D406G                     | S                                                   | Walker TM et. al., Lancet Infect Dis. 2015 Jun 23 |
| Isoniazid    | katG_D511N                     | S                                                   | Walker TM et. al., Lancet Infect Dis. 2015 Jun 23 |
| Isoniazid    | katG_E340D                     | S                                                   | Walker TM et. al., Lancet Infect Dis. 2015 Jun 23 |
| Isoniazid    | katG_E522K                     | S                                                   | Walker TM et. al., Lancet Infect Dis. 2015 Jun 23 |
| Isoniazid    | katG_E523D                     | S                                                   | Walker TM et. al., Lancet Infect Dis. 2015 Jun 23 |
| Isoniazid    | katG_G-76A                     | S                                                   | Walker TM et. al., Lancet Infect Dis. 2015 Jun 23 |
| Isoniazid    | katG_G-89A                     | S                                                   | Walker TM et. al., Lancet Infect Dis. 2015 Jun 23 |
| Isoniazid    | katG_G121S                     | S                                                   | Walker TM et. al., Lancet Infect Dis. 2015 Jun 23 |
| Isoniazid    | katG_G123R                     | S                                                   | Walker TM et. al., Lancet Infect Dis. 2015 Jun 23 |
| Isoniazid    | katG_G124A                     | S                                                   | Walker TM et. al., Lancet Infect Dis. 2015 Jun 23 |
| Isoniazid    | katG_G124D                     | S                                                   | Walker TM et. al., Lancet Infect Dis. 2015 Jun 23 |
| Isoniazid    | katG_G125D                     | R                                                   | Walker TM et. al., Lancet Infect Dis. 2015 Jun 23 |
| Isoniazid    | katG_G182R                     | R                                                   | Walker TM et. al., Lancet Infect Dis. 2015 Jun 23 |
| Isoniazid    | katG_G237A                     | S                                                   | Walker TM et. al., Lancet Infect Dis. 2015 Jun 23 |
| Isoniazid    | katG_G285V                     | S                                                   | Walker TM et. al., Lancet Infect Dis. 2015 Jun 23 |
| Isoniazid    | katG_G297V                     | R                                                   | Walker TM et. al., Lancet Infect Dis. 2015 Jun 23 |
| Isoniazid    | katG_G534R                     | S                                                   | Walker TM et. al., Lancet Infect Dis. 2015 Jun 23 |
| Isoniazid    | katG_K433T                     | S                                                   | Walker TM et. al., Lancet Infect Dis. 2015 Jun 23 |
| Isoniazid    | katG_K537E                     | S                                                   | Walker TM et. al., Lancet Infect Dis. 2015 Jun 23 |
| Isoniazid    | katG_K557N                     | S                                                   | Walker TM et. al., Lancet Infect Dis. 2015 Jun 23 |
| Isoniazid    | katG_L141F                     | R                                                   | Walker TM et. al., Lancet Infect Dis. 2015 Jun 23 |
| Isoniazid    | katG_L159P                     | R                                                   | Walker TM et. al., Lancet Infect Dis. 2015 Jun 23 |
| Isoniazid    | katG_L205R                     | S                                                   | Walker TM et. al., Lancet Infect Dis. 2015 Jun 23 |
| Isoniazid    | katG_L398R                     | S                                                   | Walker TM et. al., Lancet Infect Dis. 2015 Jun 23 |
| Isoniazid    | katG_L598R                     | S                                                   | Walker TM et. al., Lancet Infect Dis. 2015 Jun 23 |
| Isoniazid    | katG_L696Q                     | S                                                   | Walker TM et. al., Lancet Infect Dis. 2015 Jun 23 |
| Isoniazid    | katG_L704S                     | R                                                   | Walker TM et. al., Lancet Infect Dis. 2015 Jun 23 |
| Isoniazid    | katG_M257I                     | S                                                   | Walker TM et. al., Lancet Infect Dis. 2015 Jun 23 |
| Isoniazid    | katG_M609T                     | S                                                   | Walker TM et. al., Lancet Infect Dis. 2015 Jun 23 |
| Isoniazid    | katG_N323S                     | S                                                   | Walker TM et. al., Lancet Infect Dis. 2015 Jun 23 |
| Isoniazid    | katG_N562H                     | S                                                   | Walker TM et. al., Lancet Infect Dis. 2015 Jun 23 |
| Isoniazid    | katG_P232R                     | R                                                   | Walker TM et. al., Lancet Infect Dis. 2015 Jun 23 |
| Isoniazid    | katG_P432T                     | S                                                   | Walker TM et. al., Lancet Infect Dis. 2015 Jun 23 |
| Isoniazid    | katG_P510A                     | S                                                   | Walker TM et. al., Lancet Infect Dis. 2015 Jun 23 |
| Isoniazid    | katG_P6S                       | S                                                   | Walker TM et. al., Lancet Infect Dis. 2015 Jun 23 |
| Isoniazid    | katG_Q295A                     | S                                                   | Walker TM et. al., Lancet Infect Dis. 2015 Jun 23 |
| Isoniazid    | katG_Q36P                      | S                                                   | Walker TM et. al., Lancet Infect Dis. 2015 Jun 23 |
| Isoniazid    | katG_Q525K                     | S                                                   | Walker TM et. al., Lancet Infect Dis. 2015 Jun 23 |
| Isoniazid    | katG_Q525S                     | S                                                   | Walker TM et. al., Lancet Infect Dis. 2015 Jun 23 |
| Isoniazid    | katG_Q88E                      | S                                                   | Walker TM et. al., Lancet Infect Dis. 2015 Jun 23 |
| Isoniazid    | katG_R104Q                     | R                                                   | Walker TM et. al., Lancet Infect Dis. 2015 Jun 23 |
| Isoniazid    | katG_R519H                     | S                                                   | Walker TM et. al., Lancet Infect Dis. 2015 Jun 23 |
| Isoniazid    | katG_S446N                     | S                                                   | Walker TM et. al., Lancet Infect Dis. 2015 Jun 23 |
| Isoniazid    | katG_S481L                     | R                                                   | Walker TM et. al., Lancet Infect Dis. 2015 Jun 23 |
| Isoniazid    | katG_S527L                     | S                                                   | Walker TM et. al., Lancet Infect Dis. 2015 Jun 23 |
| Isoniazid    | katG_S700P                     | R                                                   | Walker TM et. al., Lancet Infect Dis. 2015 Jun 23 |
| Isoniazid    | katG_T-13C                     | S                                                   | Walker TM et. al., Lancet Infect Dis. 2015 Jun 23 |
| Isoniazid    | katG_T12A                      | S                                                   | Walker TM et. al., Lancet Infect Dis. 2015 Jun 23 |
| Isoniazid    | katG_T180K                     | R                                                   | Walker TM et. al., Lancet Infect Dis. 2015 Jun 23 |
| Isoniazid    | katG_T308A                     | S                                                   | Walker TM et. al., Lancet Infect Dis. 2015 Jun 23 |
| Isoniazid    | katG_T394A                     | S                                                   | Walker TM et. al., Lancet Infect Dis. 2015 Jun 23 |
| Isoniazid    | katG_T475I                     | S                                                   | Walker TM et. al., Lancet Infect Dis. 2015 Jun 23 |
| Isoniazid    | katG_T625A                     | S                                                   | Walker TM et. al., Lancet Infect Dis. 2015 Jun 23 |
| Isoniazid    | katG_T667I                     | S                                                   | Walker TM et. al., Lancet Infect Dis. 2015 Jun 23 |
| Isoniazid    | katG_T77R                      | S                                                   | Walker TM et. al., Lancet Infect Dis. 2015 Jun 23 |
| Isoniazid    | katG_V23L                      | S                                                   | Walker TM et. al., Lancet Infect Dis. 2015 Jun 23 |
| Isoniazid    | katG_V260I                     | S                                                   | Walker TM et. al., Lancet Infect Dis. 2015 Jun 23 |
| Isoniazid    | katG_V445I                     | S                                                   | Walker TM et. al., Lancet Infect Dis. 2015 Jun 23 |
| Isoniazid    | katG_V469L                     | S                                                   | Walker TM et. al., Lancet Infect Dis. 2015 Jun 23 |
| Isoniazid    | katG_V473L                     | S                                                   | Walker TM et. al., Lancet Infect Dis. 2015 Jun 23 |
| Isoniazid    | katG_V47I                      | S                                                   | Walker TM et. al., Lancet Infect Dis. 2015 Jun 23 |
| Isoniazid    | katG_V507I                     | S                                                   | Walker TM et. al., Lancet Infect Dis. 2015 Jun 23 |
| Isoniazid    | katG_V633A                     | R                                                   | Walker TM et. al., Lancet Infect Dis. 2015 Jun 23 |
| Isoniazid    | katG_S315I                     | R                                                   | ReSeqTB systematic review                         |
| Isoniazid    | katG_S315N                     | R                                                   | ReSeqTB systematic review                         |
| Isoniazid    | katG_S315T                     | R                                                   | ReSeqTB systematic review                         |
| Isoniazid    | katG_V68G                      | S                                                   | Walker TM et. al., Lancet Infect Dis. 2015 Jun 23 |
| Isoniazid    | katG_V739M                     | S                                                   | Walker TM et. al., Lancet Infect Dis. 2015 Jun 23 |
| Isoniazid    | katG_W191G                     | R                                                   | Walker TM et. al., Lancet Infect Dis. 2015 Jun 23 |
| Isoniazid    | katG_W191R                     | R                                                   | Walker TM et. al., Lancet Infect Dis. 2015 Jun 23 |
| Isoniazid    | katG_W300C                     | R                                                   | Walker TM et. al., Lancet Infect Dis. 2015 Jun 23 |
| Isoniazid    | katG_W328L                     | R                                                   | Walker TM et. al., Lancet Infect Dis. 2015 Jun 23 |
| Isoniazid    | katG_W505Stop                  | R                                                   | Walker TM et. al., Lancet Infect Dis. 2015 Jun 23 |
| Isoniazid    | katG_W90R                      | R                                                   | Walker TM et. al., Lancet Infect Dis. 2015 Jun 23 |
| Isoniazid    | katG: All synonymous mutations | S                                                   | Walker TM et. al., Lancet Infect Dis. 2015 Jun 23 |
| Pyrazinamide | pncA_-1526_indel               | pncA_-1526_561+4428_del_GCGTTGGGGTGTCTTGACCTGTCGTCR | Walker TM et. al., Lancet Infect Dis. 2015 Jun 23 |
| Pyrazinamide | pncA_-3_indel                  | pncA_-3_-2_ins_C                                    | Walker TM et. al., Lancet Infect Dis. 2015 Jun 23 |
| Pyrazinamide | pncA_-745_indel                | pncA_-745_492_del_TGCGCTGGTGGGTTTCGGCGCCACCCATGCCR  | Walker TM et. al., Lancet Infect Dis. 2015 Jun 23 |
| Pyrazinamide | pncA_*187Stop                  |                                                     | Walker TM et. al., Lancet Infect Dis. 2015 Jun 23 |
| Pyrazinamide | pncA_145_indel                 | pncA_145_155_del_GACTCCACAT                         | Walker TM et. al., Lancet Infect Dis. 2015 Jun 23 |

|              |                                                |                                                     |   |                                                   |
|--------------|------------------------------------------------|-----------------------------------------------------|---|---------------------------------------------------|
| Pyrazinamide | pncA_185_indel                                 | pncA_185_186_ins_A                                  | R | Walker TM et. al., Lancet Infect Dis. 2015 Jun 23 |
| Pyrazinamide | pncA_189_indel                                 | pncA_189_200_del_CTATTCCTCGTC                       | S | Walker TM et. al., Lancet Infect Dis. 2015 Jun 23 |
| Pyrazinamide | pncA_192_indel                                 | pncA_192_193_ins_A                                  | R | Walker TM et. al., Lancet Infect Dis. 2015 Jun 23 |
| Pyrazinamide | pncA_231_indel                                 | pncA_231_231_del_C                                  | R | Walker TM et. al., Lancet Infect Dis. 2015 Jun 23 |
| Pyrazinamide | pncA_306_indel                                 | pncA_306_309_del_GTAC                               | R | Walker TM et. al., Lancet Infect Dis. 2015 Jun 23 |
| Pyrazinamide | pncA_338_indel                                 | pncA_338_346_del_GCACGCCAC                          | S | Walker TM et. al., Lancet Infect Dis. 2015 Jun 23 |
| Pyrazinamide | pncA_386_indel                                 | pncA_386_389_del_ATGT                               | R | Walker TM et. al., Lancet Infect Dis. 2015 Jun 23 |
| Pyrazinamide | pncA_395_indel                                 | pncA_395_527_del_GTATTGCCACCGATCATTGTGTGCGCCAGACG(S | S | Walker TM et. al., Lancet Infect Dis. 2015 Jun 23 |
| Pyrazinamide | pncA_416_indel                                 | pncA_416_416_del_T                                  | S | Walker TM et. al., Lancet Infect Dis. 2015 Jun 23 |
| Pyrazinamide | pncA_428_indel                                 | pncA_428_429_ins_GCCAGACGGC                         | R | Walker TM et. al., Lancet Infect Dis. 2015 Jun 23 |
| Pyrazinamide | pncA_456_indel                                 | pncA_456_457_ins_C                                  | R | Walker TM et. al., Lancet Infect Dis. 2015 Jun 23 |
| Pyrazinamide | pncA_463_indel                                 | pncA_463_464_ins_G                                  | R | Walker TM et. al., Lancet Infect Dis. 2015 Jun 23 |
| Pyrazinamide | pncA_47_indel                                  | pncA_47_48_ins_G                                    | S | Walker TM et. al., Lancet Infect Dis. 2015 Jun 23 |
| Pyrazinamide | pncA_470_indel                                 | pncA_470_471_ins_A                                  | R | Walker TM et. al., Lancet Infect Dis. 2015 Jun 23 |
| Pyrazinamide | pncA_48_indel                                  | pncA_48_74_del_TGGCTCGTGCGGTAACCGGTGGCGC            | R | Walker TM et. al., Lancet Infect Dis. 2015 Jun 23 |
| Pyrazinamide | pncA_517_indel                                 | pncA_517_518_ins_G                                  | R | Walker TM et. al., Lancet Infect Dis. 2015 Jun 23 |
| Isoniazid    | katG: Any amino acid substitution at codon 315 |                                                     | R | WHO endorsed line probe assays                    |
| Isoniazid    | katG: Any frame shift insertion or deletion    |                                                     | R | ReSeqTB systematic review                         |
| Pyrazinamide | pncA_553_indel                                 | pncA_553_561+3_del_AGCTCCTGATGG                     | R | Walker TM et. al., Lancet Infect Dis. 2015 Jun 23 |
| Pyrazinamide | pncA_A102P                                     |                                                     | S | Walker TM et. al., Lancet Infect Dis. 2015 Jun 23 |
| Pyrazinamide | pncA_A134D                                     |                                                     | S | Walker TM et. al., Lancet Infect Dis. 2015 Jun 23 |
| Pyrazinamide | pncA_A143V                                     |                                                     | S | Walker TM et. al., Lancet Infect Dis. 2015 Jun 23 |
| Pyrazinamide | pncA_A146T                                     |                                                     | S | Walker TM et. al., Lancet Infect Dis. 2015 Jun 23 |
| Pyrazinamide | pncA_A79T                                      |                                                     | S | Walker TM et. al., Lancet Infect Dis. 2015 Jun 23 |
| Pyrazinamide | pncA_C-19T                                     |                                                     | S | Walker TM et. al., Lancet Infect Dis. 2015 Jun 23 |
| Pyrazinamide | pncA_C138R                                     |                                                     | R | Walker TM et. al., Lancet Infect Dis. 2015 Jun 23 |
| Pyrazinamide | pncA_D129N                                     |                                                     | S | Walker TM et. al., Lancet Infect Dis. 2015 Jun 23 |
| Pyrazinamide | pncA_D136N                                     |                                                     | R | Walker TM et. al., Lancet Infect Dis. 2015 Jun 23 |
| Pyrazinamide | pncA_D53E                                      |                                                     | S | Walker TM et. al., Lancet Infect Dis. 2015 Jun 23 |
| Pyrazinamide | pncA_D63A                                      |                                                     | S | Walker TM et. al., Lancet Infect Dis. 2015 Jun 23 |
| Pyrazinamide | pncA_E37V                                      |                                                     | S | Walker TM et. al., Lancet Infect Dis. 2015 Jun 23 |
| Pyrazinamide | pncA_F81V                                      |                                                     | R | Walker TM et. al., Lancet Infect Dis. 2015 Jun 23 |
| Pyrazinamide | pncA_G-33A                                     |                                                     | S | Walker TM et. al., Lancet Infect Dis. 2015 Jun 23 |
| Pyrazinamide | pncA_G17S                                      |                                                     | S | Walker TM et. al., Lancet Infect Dis. 2015 Jun 23 |
| Pyrazinamide | pncA_G78C                                      |                                                     | R | Walker TM et. al., Lancet Infect Dis. 2015 Jun 23 |
| Pyrazinamide | pncA_G97R                                      |                                                     | R | Walker TM et. al., Lancet Infect Dis. 2015 Jun 23 |
| Pyrazinamide | pncA_H137R                                     |                                                     | R | Walker TM et. al., Lancet Infect Dis. 2015 Jun 23 |
| Pyrazinamide | pncA_H82D                                      |                                                     | S | Walker TM et. al., Lancet Infect Dis. 2015 Jun 23 |
| Pyrazinamide | pncA_K48E                                      |                                                     | R | Walker TM et. al., Lancet Infect Dis. 2015 Jun 23 |
| Pyrazinamide | pncA_L159V                                     |                                                     | R | Walker TM et. al., Lancet Infect Dis. 2015 Jun 23 |
| Pyrazinamide | pncA_A-11G                                     |                                                     | R | ReSeqTB systematic review                         |
| Pyrazinamide | pncA_L182S                                     |                                                     | S | Walker TM et. al., Lancet Infect Dis. 2015 Jun 23 |
| Pyrazinamide | pncA_L27P                                      |                                                     | R | Walker TM et. al., Lancet Infect Dis. 2015 Jun 23 |
| Pyrazinamide | pncA_A134V                                     |                                                     | R | ReSeqTB systematic review                         |
| Pyrazinamide | pncA_L35R                                      |                                                     | S | Walker TM et. al., Lancet Infect Dis. 2015 Jun 23 |
| Pyrazinamide | pncA_M1I                                       |                                                     | S | Walker TM et. al., Lancet Infect Dis. 2015 Jun 23 |
| Pyrazinamide | pncA_A171E                                     |                                                     | R | ReSeqTB systematic review                         |
| Pyrazinamide | pncA_A3E                                       |                                                     | R | ReSeqTB systematic review                         |
| Pyrazinamide | pncA_A46V                                      |                                                     | R | ReSeqTB systematic review                         |
| Pyrazinamide | pncA_P54Q                                      |                                                     | R | Walker TM et. al., Lancet Infect Dis. 2015 Jun 23 |
| Pyrazinamide | pncA_P69S                                      |                                                     | S | Walker TM et. al., Lancet Infect Dis. 2015 Jun 23 |
| Pyrazinamide | pncA_P77L                                      |                                                     | S | Walker TM et. al., Lancet Infect Dis. 2015 Jun 23 |
| Pyrazinamide | pncA_C138Y                                     |                                                     | R | ReSeqTB systematic review                         |
| Pyrazinamide | pncA_C14R                                      |                                                     | R | ReSeqTB systematic review                         |
| Pyrazinamide | pncA_C72R                                      |                                                     | R | ReSeqTB systematic review                         |
| Pyrazinamide | pncA_Q10Stop                                   |                                                     | R | Walker TM et. al., Lancet Infect Dis. 2015 Jun 23 |
| Pyrazinamide | pncA_D12A                                      |                                                     | R | ReSeqTB systematic review                         |
| Pyrazinamide | pncA_D12G                                      |                                                     | R | ReSeqTB systematic review                         |
| Pyrazinamide | pncA_D12N                                      |                                                     | R | ReSeqTB systematic review                         |
| Pyrazinamide | pncA_Q141Stop                                  |                                                     | R | Walker TM et. al., Lancet Infect Dis. 2015 Jun 23 |
| Pyrazinamide | pncA_D49G                                      |                                                     | R | ReSeqTB systematic review                         |
| Pyrazinamide | pncA_D49N                                      |                                                     | R | ReSeqTB systematic review                         |
| Pyrazinamide | pncA_R121Q                                     |                                                     | S | Walker TM et. al., Lancet Infect Dis. 2015 Jun 23 |
| Pyrazinamide | pncA_S104G                                     |                                                     | R | Walker TM et. al., Lancet Infect Dis. 2015 Jun 23 |
| Pyrazinamide | pncA_D63G                                      |                                                     | R | ReSeqTB systematic review                         |
| Pyrazinamide | pncA_D8E                                       |                                                     | R | ReSeqTB systematic review                         |
| Pyrazinamide | pncA_D8G                                       |                                                     | R | ReSeqTB systematic review                         |
| Pyrazinamide | pncA_D8N                                       |                                                     | R | ReSeqTB systematic review                         |
| Pyrazinamide | pncA_S18P                                      |                                                     | S | Walker TM et. al., Lancet Infect Dis. 2015 Jun 23 |
| Pyrazinamide | pncA_F58L                                      |                                                     | R | ReSeqTB systematic review                         |
| Pyrazinamide | pncA_S32I                                      |                                                     | R | Walker TM et. al., Lancet Infect Dis. 2015 Jun 23 |
| Pyrazinamide | pncA_F94L                                      |                                                     | R | ReSeqTB systematic review                         |
| Pyrazinamide | pncA_F94S                                      |                                                     | R | ReSeqTB systematic review                         |
| Pyrazinamide | pncA_S65P                                      |                                                     | S | Walker TM et. al., Lancet Infect Dis. 2015 Jun 23 |
| Pyrazinamide | pncA_G108R                                     |                                                     | R | ReSeqTB systematic review                         |
| Pyrazinamide | pncA_G132A                                     |                                                     | R | ReSeqTB systematic review                         |
| Pyrazinamide | pncA_G132D                                     |                                                     | R | ReSeqTB systematic review                         |
| Pyrazinamide | pncA_G132S                                     |                                                     | R | ReSeqTB systematic review                         |
| Pyrazinamide | pncA_G162D                                     |                                                     | R | ReSeqTB systematic review                         |
| Pyrazinamide | pncA_G17D                                      |                                                     | R | ReSeqTB systematic review                         |
| Pyrazinamide | pncA_S66L                                      |                                                     | S | Walker TM et. al., Lancet Infect Dis. 2015 Jun 23 |

|              |                 |                                        |   |                                                   |
|--------------|-----------------|----------------------------------------|---|---------------------------------------------------|
| Pyrazinamide | pncA_G24D       |                                        | R | ReSeqTB systematic review                         |
| Pyrazinamide | pncA_T-60G      |                                        | S | Walker TM et. al., Lancet Infect Dis. 2015 Jun 23 |
| Pyrazinamide | pncA_G97C       |                                        | R | ReSeqTB systematic review                         |
| Pyrazinamide | pncA_G97D       |                                        | R | ReSeqTB systematic review                         |
| Pyrazinamide | pncA_T114M      |                                        | S | Walker TM et. al., Lancet Infect Dis. 2015 Jun 23 |
| Pyrazinamide | pncA_G97S       |                                        | R | ReSeqTB systematic review                         |
| Pyrazinamide | pncA_H137P      |                                        | R | ReSeqTB systematic review                         |
| Pyrazinamide | pncA_T114P      |                                        | R | Walker TM et. al., Lancet Infect Dis. 2015 Jun 23 |
| Pyrazinamide | pncA_H51Q       |                                        | R | ReSeqTB systematic review                         |
| Pyrazinamide | pncA_H51R       |                                        | R | ReSeqTB systematic review                         |
| Pyrazinamide | pncA_H57D       |                                        | R | ReSeqTB systematic review                         |
| Pyrazinamide | pncA_H57P       |                                        | R | ReSeqTB systematic review                         |
| Pyrazinamide | pncA_H57R       |                                        | R | ReSeqTB systematic review                         |
| Pyrazinamide | pncA_H57Y       |                                        | R | ReSeqTB systematic review                         |
| Pyrazinamide | pncA_H71D       |                                        | R | ReSeqTB systematic review                         |
| Pyrazinamide | pncA_H71Q       |                                        | R | ReSeqTB systematic review                         |
| Pyrazinamide | pncA_H71R       |                                        | R | ReSeqTB systematic review                         |
| Pyrazinamide | pncA_H71Y       |                                        | R | ReSeqTB systematic review                         |
| Pyrazinamide | pncA_T168I      |                                        | S | Walker TM et. al., Lancet Infect Dis. 2015 Jun 23 |
| Pyrazinamide | pncA_H82R       |                                        | R | ReSeqTB systematic review                         |
| Pyrazinamide | pncA_I133T      |                                        | R | ReSeqTB systematic review                         |
| Pyrazinamide | pncA_I6T        |                                        | R | ReSeqTB systematic review                         |
| Pyrazinamide | pncA_T168S      |                                        | S | Walker TM et. al., Lancet Infect Dis. 2015 Jun 23 |
| Pyrazinamide | pncA_K96E       |                                        | R | ReSeqTB systematic review                         |
| Pyrazinamide | pncA_K96N       |                                        | R | ReSeqTB systematic review                         |
| Pyrazinamide | pncA_K96R       |                                        | R | ReSeqTB systematic review                         |
| Pyrazinamide | pncA_K96T       |                                        | R | ReSeqTB systematic review                         |
| Pyrazinamide | pncA_L116P      |                                        | R | ReSeqTB systematic review                         |
| Pyrazinamide | pncA_L116R      |                                        | R | ReSeqTB systematic review                         |
| Pyrazinamide | pncA_L120P      |                                        | R | ReSeqTB systematic review                         |
| Pyrazinamide | pncA_L151S      |                                        | R | ReSeqTB systematic review                         |
| Pyrazinamide | pncA_L159P      |                                        | R | ReSeqTB systematic review                         |
| Pyrazinamide | pncA_T47A       |                                        | R | Walker TM et. al., Lancet Infect Dis. 2015 Jun 23 |
| Pyrazinamide | pncA_L172P      |                                        | R | ReSeqTB systematic review                         |
| Pyrazinamide | pncA_T47I       |                                        | S | Walker TM et. al., Lancet Infect Dis. 2015 Jun 23 |
| Pyrazinamide | pncA_L19P       |                                        | R | ReSeqTB systematic review                         |
| Pyrazinamide | pncA_T87M       |                                        | S | Walker TM et. al., Lancet Infect Dis. 2015 Jun 23 |
| Pyrazinamide | pncA_V163G      |                                        | S | Walker TM et. al., Lancet Infect Dis. 2015 Jun 23 |
| Pyrazinamide | pncA_L4S        |                                        | R | ReSeqTB systematic review                         |
| Pyrazinamide | pncA_L85P       |                                        | R | ReSeqTB systematic review                         |
| Pyrazinamide | pncA_L85R       |                                        | R | ReSeqTB systematic review                         |
| Pyrazinamide | pncA_M175I      |                                        | R | ReSeqTB systematic review                         |
| Pyrazinamide | pncA_M175T      |                                        | R | ReSeqTB systematic review                         |
| Pyrazinamide | pncA_M175V      |                                        | R | ReSeqTB systematic review                         |
| Pyrazinamide | pncA_V183L      |                                        | S | Walker TM et. al., Lancet Infect Dis. 2015 Jun 23 |
| Pyrazinamide | pncA_P54L       |                                        | R | ReSeqTB systematic review                         |
| Pyrazinamide | pncA_V21G       |                                        | R | Walker TM et. al., Lancet Infect Dis. 2015 Jun 23 |
| Pyrazinamide | pncA_P54S       |                                        | R | ReSeqTB systematic review                         |
| Pyrazinamide | pncA_P62L       |                                        | R | ReSeqTB systematic review                         |
| Pyrazinamide | pncA_P62Q       |                                        | R | ReSeqTB systematic review                         |
| Pyrazinamide | pncA_V45A       |                                        | S | Walker TM et. al., Lancet Infect Dis. 2015 Jun 23 |
| Pyrazinamide | pncA_V7L        |                                        | R | Walker TM et. al., Lancet Infect Dis. 2015 Jun 23 |
| Pyrazinamide | pncA_Q10P       |                                        | R | ReSeqTB systematic review                         |
| Pyrazinamide | pncA_Q10R       |                                        | R | ReSeqTB systematic review                         |
| Pyrazinamide | pncA_Y64D       |                                        | S | Walker TM et. al., Lancet Infect Dis. 2015 Jun 23 |
| Pyrazinamide | pncA_Q141P      |                                        | R | ReSeqTB systematic review                         |
| Pyrazinamide | pncA_Y99Stop    |                                        | R | Walker TM et. al., Lancet Infect Dis. 2015 Jun 23 |
| Rifampicin   | rpoB_1278_indel | rpoB_1278_1286_del_CACCAGCCA           | R | Walker TM et. al., Lancet Infect Dis. 2015 Jun 23 |
| Pyrazinamide | pncA_R123P      |                                        | R | ReSeqTB systematic review                         |
| Rifampicin   | rpoB_1292_indel | rpoB_1292_1293_ins_CCA                 | R | Walker TM et. al., Lancet Infect Dis. 2015 Jun 23 |
| Pyrazinamide | pncA_S104R      |                                        | R | ReSeqTB systematic review                         |
| Rifampicin   | rpoB_1295_indel | rpoB_1295_1303_del_AATTCATGG           | R | Walker TM et. al., Lancet Infect Dis. 2015 Jun 23 |
| Rifampicin   | rpoB_1296_indel | rpoB_1296_1297_ins_TTC                 | R | Walker TM et. al., Lancet Infect Dis. 2015 Jun 23 |
| Pyrazinamide | pncA_S59P       |                                        | R | ReSeqTB systematic review                         |
| Rifampicin   | rpoB_1299_indel | rpoB_1299_1304_del_CATGGA              | R | Walker TM et. al., Lancet Infect Dis. 2015 Jun 23 |
| Rifampicin   | rpoB_1328_indel | rpoB_1328_1337_delTGACCCACAAinsGGCCCCA | R | Walker TM et. al., Lancet Infect Dis. 2015 Jun 23 |
| Pyrazinamide | pncA_S66P       |                                        | R | ReSeqTB systematic review                         |
| Pyrazinamide | pncA_S67P       |                                        | R | ReSeqTB systematic review                         |
| Pyrazinamide | pncA_T-12C      |                                        | R | ReSeqTB systematic review                         |
| Rifampicin   | rpoB_2546_indel | rpoB_2546_2547_ins_CGAGGA              | S | Walker TM et. al., Lancet Infect Dis. 2015 Jun 23 |
| Pyrazinamide | pncA_T-7C       |                                        | R | ReSeqTB systematic review                         |
| Rifampicin   | rpoB_A-53G      |                                        | S | Walker TM et. al., Lancet Infect Dis. 2015 Jun 23 |
| Rifampicin   | rpoB_A334D      |                                        | S | Walker TM et. al., Lancet Infect Dis. 2015 Jun 23 |
| Pyrazinamide | pncA_T135N      |                                        | R | ReSeqTB systematic review                         |
| Pyrazinamide | pncA_T135P      |                                        | R | ReSeqTB systematic review                         |
| Pyrazinamide | pncA_T142A      |                                        | R | ReSeqTB systematic review                         |
| Pyrazinamide | pncA_T142K      |                                        | R | ReSeqTB systematic review                         |
| Pyrazinamide | pncA_T142M      |                                        | R | ReSeqTB systematic review                         |
| Pyrazinamide | pncA_T160P      |                                        | R | ReSeqTB systematic review                         |
| Rifampicin   | rpoB_A544V      |                                        | S | Walker TM et. al., Lancet Infect Dis. 2015 Jun 23 |
| Pyrazinamide | pncA_T168P      |                                        | R | ReSeqTB systematic review                         |

|              |                                             |                    |                                                   |
|--------------|---------------------------------------------|--------------------|---------------------------------------------------|
| Rifampicin   | rpoB_A69P                                   | S                  | Walker TM et. al., Lancet Infect Dis. 2015 Jun 23 |
| Rifampicin   | rpoB_A857T                                  | S                  | Walker TM et. al., Lancet Infect Dis. 2015 Jun 23 |
| Rifampicin   | rpoB_A998V                                  | S                  | Walker TM et. al., Lancet Infect Dis. 2015 Jun 23 |
| Pyrazinamide | pncA_T76P                                   | R                  | ReSeqTB systematic review                         |
| Rifampicin   | rpoB_C-62T                                  | S                  | Walker TM et. al., Lancet Infect Dis. 2015 Jun 23 |
| Pyrazinamide | pncA_V125F                                  | R                  | ReSeqTB systematic review                         |
| Pyrazinamide | pncA_V125G                                  | R                  | ReSeqTB systematic review                         |
| Pyrazinamide | pncA_V128G                                  | R                  | ReSeqTB systematic review                         |
| Pyrazinamide | pncA_V139A                                  | R                  | ReSeqTB systematic review                         |
| Pyrazinamide | pncA_V139G                                  | R                  | ReSeqTB systematic review                         |
| Pyrazinamide | pncA_V139L                                  | R                  | ReSeqTB systematic review                         |
| Pyrazinamide | pncA_V155G                                  | R                  | ReSeqTB systematic review                         |
| Rifampicin   | rpoB_C-73T                                  | S                  | Walker TM et. al., Lancet Infect Dis. 2015 Jun 23 |
| Pyrazinamide | pncA_V180F                                  | R                  | ReSeqTB systematic review                         |
| Pyrazinamide | pncA_V180G                                  | R                  | ReSeqTB systematic review                         |
| Rifampicin   | rpoB_D270E                                  | S                  | Walker TM et. al., Lancet Infect Dis. 2015 Jun 23 |
| Rifampicin   | rpoB_D362H                                  | S                  | Walker TM et. al., Lancet Infect Dis. 2015 Jun 23 |
| Rifampicin   | rpoB_D3G                                    | S                  | Walker TM et. al., Lancet Infect Dis. 2015 Jun 23 |
| Pyrazinamide | pncA_V7G                                    | R                  | ReSeqTB systematic review                         |
| Rifampicin   | rpoB_D515Y                                  | S                  | Walker TM et. al., Lancet Infect Dis. 2015 Jun 23 |
| Pyrazinamide | pncA_W68C                                   | R                  | ReSeqTB systematic review                         |
| Pyrazinamide | pncA_W68G                                   | R                  | ReSeqTB systematic review                         |
| Pyrazinamide | pncA_W68R                                   | R                  | ReSeqTB systematic review                         |
| Pyrazinamide | pncA_Y103H                                  | R                  | ReSeqTB systematic review                         |
| Pyrazinamide | pncA_Y34D                                   | R                  | ReSeqTB systematic review                         |
| Rifampicin   | rpoB_D53N                                   | S                  | Walker TM et. al., Lancet Infect Dis. 2015 Jun 23 |
| Rifampicin   | rpoB_D545A                                  | S                  | Walker TM et. al., Lancet Infect Dis. 2015 Jun 23 |
| Rifampicin   | rpoB_D634G                                  | S                  | Walker TM et. al., Lancet Infect Dis. 2015 Jun 23 |
| Pyrazinamide | pncA: Any frame shift insertion or deletion | R                  | ReSeqTB systematic review                         |
| Rifampicin   | rpoB_D851G                                  | S                  | Walker TM et. al., Lancet Infect Dis. 2015 Jun 23 |
| Rifampicin   | rpoB_E1169A                                 | S                  | Walker TM et. al., Lancet Infect Dis. 2015 Jun 23 |
| Rifampicin   | rpoB_E132D                                  | S                  | Walker TM et. al., Lancet Infect Dis. 2015 Jun 23 |
| Rifampicin   | rpoB_E563D                                  | S                  | Walker TM et. al., Lancet Infect Dis. 2015 Jun 23 |
| Rifampicin   | rpoB_E639G                                  | S                  | Walker TM et. al., Lancet Infect Dis. 2015 Jun 23 |
| Rifampicin   | rpoB_E639Q                                  | S                  | Walker TM et. al., Lancet Infect Dis. 2015 Jun 23 |
| Rifampicin   | rpoB_E66K                                   | S                  | Walker TM et. al., Lancet Infect Dis. 2015 Jun 23 |
| Rifampicin   | rpoB_E825G                                  | S                  | Walker TM et. al., Lancet Infect Dis. 2015 Jun 23 |
| Rifampicin   | rpoB_G-96A                                  | S                  | Walker TM et. al., Lancet Infect Dis. 2015 Jun 23 |
| Rifampicin   | rpoB_G28R                                   | S                  | Walker TM et. al., Lancet Infect Dis. 2015 Jun 23 |
| Rifampicin   | rpoB_G890D                                  | S                  | Walker TM et. al., Lancet Infect Dis. 2015 Jun 23 |
| Rifampicin   | rpoB_G981D                                  | R                  | Walker TM et. al., Lancet Infect Dis. 2015 Jun 23 |
| Rifampicin   | rpoB_H343Q                                  | S                  | Walker TM et. al., Lancet Infect Dis. 2015 Jun 23 |
| Rifampicin   | rpoB_H674Q                                  | S                  | Walker TM et. al., Lancet Infect Dis. 2015 Jun 23 |
| Rifampicin   | rpoB_K944E                                  | S                  | Walker TM et. al., Lancet Infect Dis. 2015 Jun 23 |
| Rifampicin   | rpoB_L314V                                  | S                  | Walker TM et. al., Lancet Infect Dis. 2015 Jun 23 |
| Rifampicin   | rpoB_L316V                                  | S                  | Walker TM et. al., Lancet Infect Dis. 2015 Jun 23 |
| Rifampicin   | rpoB_L443F                                  | S                  | Walker TM et. al., Lancet Infect Dis. 2015 Jun 23 |
| Rifampicin   | rpoB_L80V                                   | S                  | Walker TM et. al., Lancet Infect Dis. 2015 Jun 23 |
| Rifampicin   | rpoB_L893R                                  | S                  | Walker TM et. al., Lancet Infect Dis. 2015 Jun 23 |
| Rifampicin   | rpoB_M121I                                  | S                  | Walker TM et. al., Lancet Infect Dis. 2015 Jun 23 |
| Rifampicin   | rpoB_M153T                                  | S                  | Walker TM et. al., Lancet Infect Dis. 2015 Jun 23 |
| Rifampicin   | rpoB_M390T                                  | S                  | Walker TM et. al., Lancet Infect Dis. 2015 Jun 23 |
| Rifampicin   | rpoB_M434I                                  | R                  | Walker TM et. al., Lancet Infect Dis. 2015 Jun 23 |
| Rifampicin   | rpoB_N24D                                   | S                  | Walker TM et. al., Lancet Infect Dis. 2015 Jun 23 |
| Rifampicin   | rpoB_P30S                                   | S                  | Walker TM et. al., Lancet Infect Dis. 2015 Jun 23 |
| Rifampicin   | rpoB_P358L                                  | S                  | Walker TM et. al., Lancet Infect Dis. 2015 Jun 23 |
| Rifampicin   | rpoB_P454L                                  | S                  | Walker TM et. al., Lancet Infect Dis. 2015 Jun 23 |
| Rifampicin   | rpoB_P682T                                  | S                  | Walker TM et. al., Lancet Infect Dis. 2015 Jun 23 |
| Rifampicin   | rpoB_P834L                                  | S                  | Walker TM et. al., Lancet Infect Dis. 2015 Jun 23 |
| Rifampicin   | rpoB_P89L                                   | S                  | Walker TM et. al., Lancet Infect Dis. 2015 Jun 23 |
| Rifampicin   | rpoB_R511L                                  | S                  | Walker TM et. al., Lancet Infect Dis. 2015 Jun 23 |
| Rifampicin   | rpoB_R661Q                                  | S                  | Walker TM et. al., Lancet Infect Dis. 2015 Jun 23 |
| Rifampicin   | rpoB_S1124A                                 | S                  | Walker TM et. al., Lancet Infect Dis. 2015 Jun 23 |
| Rifampicin   | rpoB_S195R                                  | S                  | Walker TM et. al., Lancet Infect Dis. 2015 Jun 23 |
| Rifampicin   | rpoB_S21F                                   | S                  | Walker TM et. al., Lancet Infect Dis. 2015 Jun 23 |
| Rifampicin   | rpoB_S388L                                  | S                  | Walker TM et. al., Lancet Infect Dis. 2015 Jun 23 |
| Rifampicin   | rpoB_T-6C                                   | S                  | Walker TM et. al., Lancet Infect Dis. 2015 Jun 23 |
| Rifampicin   | rpoB_T350I                                  | S                  | Walker TM et. al., Lancet Infect Dis. 2015 Jun 23 |
| Rifampicin   | rpoB_T526S                                  | S                  | Walker TM et. al., Lancet Infect Dis. 2015 Jun 23 |
| Rifampicin   | rpoB_T676P                                  | R                  | Walker TM et. al., Lancet Infect Dis. 2015 Jun 23 |
| Rifampicin   | rpoB_V109I                                  | S                  | Walker TM et. al., Lancet Infect Dis. 2015 Jun 23 |
| Rifampicin   | rpoB_V1117L                                 | S                  | Walker TM et. al., Lancet Infect Dis. 2015 Jun 23 |
| Rifampicin   | rpoB_V1129A                                 | S                  | Walker TM et. al., Lancet Infect Dis. 2015 Jun 23 |
| Rifampicin   | rpoB_V113I                                  | S                  | Walker TM et. al., Lancet Infect Dis. 2015 Jun 23 |
| Rifampicin   | rpoB_V170F                                  | R                  | Walker TM et. al., Lancet Infect Dis. 2015 Jun 23 |
| Rifampicin   | rpoB_V179A                                  | S                  | Walker TM et. al., Lancet Infect Dis. 2015 Jun 23 |
| Rifampicin   | rpoB_V359A                                  | R                  | Walker TM et. al., Lancet Infect Dis. 2015 Jun 23 |
| Rifampicin   | rpoB_V695L                                  | S                  | Walker TM et. al., Lancet Infect Dis. 2015 Jun 23 |
| Rifampicin   | rpoB_V77M                                   | S                  | Walker TM et. al., Lancet Infect Dis. 2015 Jun 23 |
| Ethambutol   | embA_M153T                                  | S (Phylogenetic SN | Walker TM et. al., Lancet Infect Dis. 2015 Jun 23 |
| Rifampicin   | rpoB: All synonymous mutations              | S                  | Walker TM et. al., Lancet Infect Dis. 2015 Jun 23 |

|              |                                                                                     |                                                                      |
|--------------|-------------------------------------------------------------------------------------|----------------------------------------------------------------------|
| Ethambutol   | embA_P913S                                                                          | S (Phylogenetic SN Walker TM et. al., Lancet Infect Dis. 2015 Jun 23 |
| Ethambutol   | embB: All synonymous mutations                                                      | S Walker TM et. al., Lancet Infect Dis. 2015 Jun 23                  |
| Ethambutol   | embA_S49R                                                                           | S (Phylogenetic SN Walker TM et. al., Lancet Infect Dis. 2015 Jun 23 |
| Ethambutol   | embA: All synonymous mutations                                                      | S Walker TM et. al., Lancet Infect Dis. 2015 Jun 23                  |
| Ethambutol   | embA_T608N                                                                          | S (Phylogenetic SN Walker TM et. al., Lancet Infect Dis. 2015 Jun 23 |
| Ethambutol   | embC: All synonymous mutations                                                      | S Walker TM et. al., Lancet Infect Dis. 2015 Jun 23                  |
| Ethambutol   | embA_V206M                                                                          | S (Phylogenetic SN Walker TM et. al., Lancet Infect Dis. 2015 Jun 23 |
| Pyrazinamide | pncA: All synonymous mutations                                                      | S Walker TM et. al., Lancet Infect Dis. 2015 Jun 23                  |
| Ethambutol   | embB_E378A                                                                          | S (Phylogenetic SN Walker TM et. al., Lancet Infect Dis. 2015 Jun 23 |
| Ethambutol   | embB_K561R                                                                          | S (Phylogenetic SN Walker TM et. al., Lancet Infect Dis. 2015 Jun 23 |
| Ethambutol   | embB_Q139H                                                                          | S (Phylogenetic SN Walker TM et. al., Lancet Infect Dis. 2015 Jun 23 |
| Ethambutol   | embB_S565G                                                                          | S (Phylogenetic SN Walker TM et. al., Lancet Infect Dis. 2015 Jun 23 |
| Ethambutol   | embC_N394D                                                                          | S (Phylogenetic SN Walker TM et. al., Lancet Infect Dis. 2015 Jun 23 |
| Ethambutol   | embC_R567H                                                                          | S (Phylogenetic SN Walker TM et. al., Lancet Infect Dis. 2015 Jun 23 |
| Ethambutol   | embC_R738Q                                                                          | S (Phylogenetic SN Walker TM et. al., Lancet Infect Dis. 2015 Jun 23 |
| Ethambutol   | embC_T270I                                                                          | S (Phylogenetic SN Walker TM et. al., Lancet Infect Dis. 2015 Jun 23 |
| Ethambutol   | embC_V104M                                                                          | S (Phylogenetic SN Walker TM et. al., Lancet Infect Dis. 2015 Jun 23 |
| Ethambutol   | embC_V981L                                                                          | S (Phylogenetic SN Walker TM et. al., Lancet Infect Dis. 2015 Jun 23 |
| Isoniazid    | inhA_P107S                                                                          | S (Phylogenetic SN Walker TM et. al., Lancet Infect Dis. 2015 Jun 23 |
| Isoniazid    | inhA_V78A                                                                           | S (Phylogenetic SN Walker TM et. al., Lancet Infect Dis. 2015 Jun 23 |
| Isoniazid    | katG_R463L                                                                          | S (Phylogenetic SN Walker TM et. al., Lancet Infect Dis. 2015 Jun 23 |
| Rifampicin   | rpoB_C-61T                                                                          | S (Phylogenetic SN Walker TM et. al., Lancet Infect Dis. 2015 Jun 23 |
| Rifampicin   | rpoB: Any amino acid substitution or insertion/deletion from codon 425 to codon 45R | WHO endorsed line probe assays / Xpert MTB/RIF                       |
| Pyrazinamide | pncA_E37Stop                                                                        | R Yadon et. al., Nature Communications 2017 Sep 19                   |
| Pyrazinamide | pncA_E91Stop                                                                        | R Yadon et. al., Nature Communications 2017 Sep 19                   |
| Pyrazinamide | pncA_F106S                                                                          | R Yadon et. al., Nature Communications 2017 Sep 19                   |
| Pyrazinamide | pncA_F106Y                                                                          | R Yadon et. al., Nature Communications 2017 Sep 19                   |
| Pyrazinamide | pncA_F13I                                                                           | R Yadon et. al., Nature Communications 2017 Sep 19                   |
| Pyrazinamide | pncA_F13V                                                                           | R Yadon et. al., Nature Communications 2017 Sep 19                   |
| Pyrazinamide | pncA_F13Y                                                                           | R Yadon et. al., Nature Communications 2017 Sep 19                   |
| Pyrazinamide | pncA_F50F                                                                           | R Yadon et. al., Nature Communications 2017 Sep 19                   |
| Pyrazinamide | pncA_F58I                                                                           | R Yadon et. al., Nature Communications 2017 Sep 19                   |
| Pyrazinamide | pncA_F58S                                                                           | R Yadon et. al., Nature Communications 2017 Sep 19                   |
| Pyrazinamide | pncA_F81S                                                                           | R Yadon et. al., Nature Communications 2017 Sep 19                   |
| Pyrazinamide | pncA_F94C                                                                           | R Yadon et. al., Nature Communications 2017 Sep 19                   |
| Pyrazinamide | pncA_F94F                                                                           | R Yadon et. al., Nature Communications 2017 Sep 19                   |
| Pyrazinamide | pncA_G101Stop                                                                       | R Yadon et. al., Nature Communications 2017 Sep 19                   |
| Pyrazinamide | pncA_G101E                                                                          | R Yadon et. al., Nature Communications 2017 Sep 19                   |
| Pyrazinamide | pncA_G105D                                                                          | R Yadon et. al., Nature Communications 2017 Sep 19                   |
| Pyrazinamide | pncA_G105R                                                                          | R Yadon et. al., Nature Communications 2017 Sep 19                   |
| Pyrazinamide | pncA_G105V                                                                          | R Yadon et. al., Nature Communications 2017 Sep 19                   |
| Pyrazinamide | pncA_G108Stop                                                                       | R Yadon et. al., Nature Communications 2017 Sep 19                   |
| Pyrazinamide | pncA_G108E                                                                          | R Yadon et. al., Nature Communications 2017 Sep 19                   |
| Pyrazinamide | pncA_G124S                                                                          | R Yadon et. al., Nature Communications 2017 Sep 19                   |
| Pyrazinamide | pncA_G132C                                                                          | R Yadon et. al., Nature Communications 2017 Sep 19                   |
| Pyrazinamide | pncA_G132R                                                                          | R Yadon et. al., Nature Communications 2017 Sep 19                   |
| Pyrazinamide | pncA_G132V                                                                          | R Yadon et. al., Nature Communications 2017 Sep 19                   |
| Pyrazinamide | pncA_G150G                                                                          | R Yadon et. al., Nature Communications 2017 Sep 19                   |
| Pyrazinamide | pncA_G162A                                                                          | R Yadon et. al., Nature Communications 2017 Sep 19                   |
| Pyrazinamide | pncA_G162V                                                                          | R Yadon et. al., Nature Communications 2017 Sep 19                   |
| Pyrazinamide | pncA_G16G                                                                           | R Yadon et. al., Nature Communications 2017 Sep 19                   |
| Pyrazinamide | pncA_G16R                                                                           | R Yadon et. al., Nature Communications 2017 Sep 19                   |
| Pyrazinamide | pncA_G16V                                                                           | R Yadon et. al., Nature Communications 2017 Sep 19                   |
| Pyrazinamide | pncA_G17C                                                                           | R Yadon et. al., Nature Communications 2017 Sep 19                   |
| Pyrazinamide | pncA_G23V                                                                           | R Yadon et. al., Nature Communications 2017 Sep 19                   |
| Pyrazinamide | pncA_G24V                                                                           | R Yadon et. al., Nature Communications 2017 Sep 19                   |
| Pyrazinamide | pncA_G55C                                                                           | R Yadon et. al., Nature Communications 2017 Sep 19                   |
| Pyrazinamide | pncA_G75V                                                                           | R Yadon et. al., Nature Communications 2017 Sep 19                   |
| Pyrazinamide | pncA_G78D                                                                           | R Yadon et. al., Nature Communications 2017 Sep 19                   |
| Pyrazinamide | pncA_G78V                                                                           | R Yadon et. al., Nature Communications 2017 Sep 19                   |
| Pyrazinamide | pncA_H137D                                                                          | R Yadon et. al., Nature Communications 2017 Sep 19                   |
| Pyrazinamide | pncA_H42N                                                                           | R Yadon et. al., Nature Communications 2017 Sep 19                   |
| Pyrazinamide | pncA_H42Q                                                                           | R Yadon et. al., Nature Communications 2017 Sep 19                   |
| Pyrazinamide | pncA_H43P                                                                           | R Yadon et. al., Nature Communications 2017 Sep 19                   |
| Pyrazinamide | pncA_H43Q                                                                           | R Yadon et. al., Nature Communications 2017 Sep 19                   |
| Pyrazinamide | pncA_H51D                                                                           | R Yadon et. al., Nature Communications 2017 Sep 19                   |
| Pyrazinamide | pncA_H51L                                                                           | R Yadon et. al., Nature Communications 2017 Sep 19                   |
| Pyrazinamide | pncA_H51N                                                                           | R Yadon et. al., Nature Communications 2017 Sep 19                   |
| Pyrazinamide | pncA_H51Y                                                                           | R Yadon et. al., Nature Communications 2017 Sep 19                   |
| Pyrazinamide | pncA_H57L                                                                           | R Yadon et. al., Nature Communications 2017 Sep 19                   |
| Pyrazinamide | pncA_H57N                                                                           | R Yadon et. al., Nature Communications 2017 Sep 19                   |
| Pyrazinamide | pncA_H57Q                                                                           | R Yadon et. al., Nature Communications 2017 Sep 19                   |
| Pyrazinamide | pncA_H71H                                                                           | R Yadon et. al., Nature Communications 2017 Sep 19                   |
| Pyrazinamide | pncA_H71L                                                                           | R Yadon et. al., Nature Communications 2017 Sep 19                   |
| Pyrazinamide | pncA_H71N                                                                           | R Yadon et. al., Nature Communications 2017 Sep 19                   |
| Pyrazinamide | pncA_H82L                                                                           | R Yadon et. al., Nature Communications 2017 Sep 19                   |
| Pyrazinamide | pncA_I133F                                                                          | R Yadon et. al., Nature Communications 2017 Sep 19                   |
| Pyrazinamide | pncA_I133N                                                                          | R Yadon et. al., Nature Communications 2017 Sep 19                   |
| Pyrazinamide | pncA_I31F                                                                           | R Yadon et. al., Nature Communications 2017 Sep 19                   |
| Pyrazinamide | pncA_I31N                                                                           | R Yadon et. al., Nature Communications 2017 Sep 19                   |
| Pyrazinamide | pncA_I31T                                                                           | R Yadon et. al., Nature Communications 2017 Sep 19                   |









Pyrazinamide pncA\_E174K  
Pyrazinamide pncA\_E181Stop  
Pyrazinamide pncA\_E181K

R Yadon et. al., Nature Communications 2017 Sep 19  
R Yadon et. al., Nature Communications 2017 Sep 19  
R Yadon et. al., Nature Communications 2017 Sep 19

For each drug (for which the phenotype is marked with an \* in the table below, and presented in the order 'isoniazid, rifampicin, ethambutol, pyrazinamide'), against each possible combination of phenotypes among the other three drugs, the negative predictive value was calculated for a prevalence of resistance to the drug in question between 1%-100%. The formula by which the NPV was calculated is:  $\text{specificity} \cdot (1 - \text{prevalence}) / (\text{specificity} \cdot (1 - \text{prevalence}) + (1 - \text{sensitivity}) \cdot \text{prevalence})$

| <u>-SSS</u>                        |             |             |                           | <u>-RSS</u>                        |             |             |                           | <u>-RRS</u>                        |             |             |                           | <u>-SRS</u>                        |             |             |                           |
|------------------------------------|-------------|-------------|---------------------------|------------------------------------|-------------|-------------|---------------------------|------------------------------------|-------------|-------------|---------------------------|------------------------------------|-------------|-------------|---------------------------|
| Prevalence of isoniazid resistance | Sensitivity | Specificity | Negative Predictive Value | Prevalence of isoniazid resistance | Sensitivity | Specificity | Negative Predictive Value | Prevalence of isoniazid resistance | Sensitivity | Specificity | Negative Predictive Value | Prevalence of isoniazid resistance | Sensitivity | Specificity | Negative Predictive Value |
| 1                                  | 92.9        | 99.6        | 99.9                      | 1                                  | 95.6        | 92.4        | 100.0                     | 1                                  | 99.3        | 50.0        | 100.0                     | 1                                  | 85.7        | 100.0       | 99.9                      |
| 2                                  | 92.9        | 99.6        | 99.9                      | 2                                  | 95.6        | 92.4        | 99.9                      | 2                                  | 99.3        | 50.0        | 100.0                     | 2                                  | 85.7        | 100.0       | 99.7                      |
| 3                                  | 92.9        | 99.6        | 99.8                      | 3                                  | 95.6        | 92.4        | 99.9                      | 3                                  | 99.3        | 50.0        | 100.0                     | 3                                  | 85.7        | 100.0       | 99.6                      |
| 4                                  | 92.9        | 99.6        | 99.7                      | 4                                  | 95.6        | 92.4        | 99.8                      | 4                                  | 99.3        | 50.0        | 99.9                      | 4                                  | 85.7        | 100.0       | 99.4                      |
| 5                                  | 92.9        | 99.6        | 99.6                      | 5                                  | 95.6        | 92.4        | 99.8                      | 5                                  | 99.3        | 50.0        | 99.9                      | 5                                  | 85.7        | 100.0       | 99.3                      |
| 6                                  | 92.9        | 99.6        | 99.5                      | 6                                  | 95.6        | 92.4        | 99.7                      | 6                                  | 99.3        | 50.0        | 99.9                      | 6                                  | 85.7        | 100.0       | 99.1                      |
| 7                                  | 92.9        | 99.6        | 99.5                      | 7                                  | 95.6        | 92.4        | 99.6                      | 7                                  | 99.3        | 50.0        | 99.9                      | 7                                  | 85.7        | 100.0       | 98.9                      |
| 8                                  | 92.9        | 99.6        | 99.4                      | 8                                  | 95.6        | 92.4        | 99.6                      | 8                                  | 99.3        | 50.0        | 99.9                      | 8                                  | 85.7        | 100.0       | 98.8                      |
| 9                                  | 92.9        | 99.6        | 99.3                      | 9                                  | 95.6        | 92.4        | 99.5                      | 9                                  | 99.3        | 50.0        | 99.9                      | 9                                  | 85.7        | 100.0       | 98.6                      |
| 10                                 | 92.9        | 99.6        | 99.2                      | 10                                 | 95.6        | 92.4        | 99.5                      | 10                                 | 99.3        | 50.0        | 99.8                      | 10                                 | 85.7        | 100.0       | 98.4                      |
| 11                                 | 92.9        | 99.6        | 99.1                      | 11                                 | 95.6        | 92.4        | 99.4                      | 11                                 | 99.3        | 50.0        | 99.8                      | 11                                 | 85.7        | 100.0       | 98.3                      |
| 12                                 | 92.9        | 99.6        | 99.0                      | 12                                 | 95.6        | 92.4        | 99.4                      | 12                                 | 99.3        | 50.0        | 99.8                      | 12                                 | 85.7        | 100.0       | 98.1                      |
| 13                                 | 92.9        | 99.6        | 98.9                      | 13                                 | 95.6        | 92.4        | 99.3                      | 13                                 | 99.3        | 50.0        | 99.8                      | 13                                 | 85.7        | 100.0       | 97.9                      |
| 14                                 | 92.9        | 99.6        | 98.8                      | 14                                 | 95.6        | 92.4        | 99.2                      | 14                                 | 99.3        | 50.0        | 99.8                      | 14                                 | 85.7        | 100.0       | 97.7                      |
| 15                                 | 92.9        | 99.6        | 98.8                      | 15                                 | 95.6        | 92.4        | 99.2                      | 15                                 | 99.3        | 50.0        | 99.8                      | 15                                 | 85.7        | 100.0       | 97.5                      |
| 16                                 | 92.9        | 99.6        | 98.7                      | 16                                 | 95.6        | 92.4        | 99.1                      | 16                                 | 99.3        | 50.0        | 99.7                      | 16                                 | 85.7        | 100.0       | 97.4                      |
| 17                                 | 92.9        | 99.6        | 98.6                      | 17                                 | 95.6        | 92.4        | 99.0                      | 17                                 | 99.3        | 50.0        | 99.7                      | 17                                 | 85.7        | 100.0       | 97.2                      |
| 18                                 | 92.9        | 99.6        | 98.5                      | 18                                 | 95.6        | 92.4        | 99.0                      | 18                                 | 99.3        | 50.0        | 99.7                      | 18                                 | 85.7        | 100.0       | 97.0                      |
| 19                                 | 92.9        | 99.6        | 98.3                      | 19                                 | 95.6        | 92.4        | 98.9                      | 19                                 | 99.3        | 50.0        | 99.7                      | 19                                 | 85.7        | 100.0       | 96.8                      |
| 20                                 | 92.9        | 99.6        | 98.2                      | 20                                 | 95.6        | 92.4        | 98.8                      | 20                                 | 99.3        | 50.0        | 99.6                      | 20                                 | 85.7        | 100.0       | 96.6                      |
| 21                                 | 92.9        | 99.6        | 98.1                      | 21                                 | 95.6        | 92.4        | 98.8                      | 21                                 | 99.3        | 50.0        | 99.6                      | 21                                 | 85.7        | 100.0       | 96.3                      |
| 22                                 | 92.9        | 99.6        | 98.0                      | 22                                 | 95.6        | 92.4        | 98.7                      | 22                                 | 99.3        | 50.0        | 99.6                      | 22                                 | 85.7        | 100.0       | 96.1                      |
| 23                                 | 92.9        | 99.6        | 97.9                      | 23                                 | 95.6        | 92.4        | 98.6                      | 23                                 | 99.3        | 50.0        | 99.6                      | 23                                 | 85.7        | 100.0       | 95.9                      |
| 24                                 | 92.9        | 99.6        | 97.8                      | 24                                 | 95.6        | 92.4        | 98.5                      | 24                                 | 99.3        | 50.0        | 99.6                      | 24                                 | 85.7        | 100.0       | 95.7                      |
| 25                                 | 92.9        | 99.6        | 97.7                      | 25                                 | 95.6        | 92.4        | 98.4                      | 25                                 | 99.3        | 50.0        | 99.5                      | 25                                 | 85.7        | 100.0       | 95.5                      |
| 26                                 | 92.9        | 99.6        | 97.5                      | 26                                 | 95.6        | 92.4        | 98.4                      | 26                                 | 99.3        | 50.0        | 99.5                      | 26                                 | 85.7        | 100.0       | 95.2                      |
| 27                                 | 92.9        | 99.6        | 97.4                      | 27                                 | 95.6        | 92.4        | 98.3                      | 27                                 | 99.3        | 50.0        | 99.5                      | 27                                 | 85.7        | 100.0       | 95.0                      |
| 28                                 | 92.9        | 99.6        | 97.3                      | 28                                 | 95.6        | 92.4        | 98.2                      | 28                                 | 99.3        | 50.0        | 99.5                      | 28                                 | 85.7        | 100.0       | 94.7                      |
| 29                                 | 92.9        | 99.6        | 97.2                      | 29                                 | 95.6        | 92.4        | 98.1                      | 29                                 | 99.3        | 50.0        | 99.4                      | 29                                 | 85.7        | 100.0       | 94.5                      |
| 30                                 | 92.9        | 99.6        | 97.0                      | 30                                 | 95.6        | 92.4        | 98.0                      | 30                                 | 99.3        | 50.0        | 99.4                      | 30                                 | 85.7        | 100.0       | 94.2                      |
| 31                                 | 92.9        | 99.6        | 96.9                      | 31                                 | 95.6        | 92.4        | 97.9                      | 31                                 | 99.3        | 50.0        | 99.4                      | 31                                 | 85.7        | 100.0       | 94.0                      |
| 32                                 | 92.9        | 99.6        | 96.7                      | 32                                 | 95.6        | 92.4        | 97.8                      | 32                                 | 99.3        | 50.0        | 99.3                      | 32                                 | 85.7        | 100.0       | 93.7                      |
| 33                                 | 92.9        | 99.6        | 96.6                      | 33                                 | 95.6        | 92.4        | 97.7                      | 33                                 | 99.3        | 50.0        | 99.3                      | 33                                 | 85.7        | 100.0       | 93.4                      |
| 34                                 | 92.9        | 99.6        | 96.4                      | 34                                 | 95.6        | 92.4        | 97.6                      | 34                                 | 99.3        | 50.0        | 99.3                      | 34                                 | 85.7        | 100.0       | 93.1                      |
| 35                                 | 92.9        | 99.6        | 96.3                      | 35                                 | 95.6        | 92.4        | 97.5                      | 35                                 | 99.3        | 50.0        | 99.2                      | 35                                 | 85.7        | 100.0       | 92.9                      |
| 36                                 | 92.9        | 99.6        | 96.1                      | 36                                 | 95.6        | 92.4        | 97.4                      | 36                                 | 99.3        | 50.0        | 99.2                      | 36                                 | 85.7        | 100.0       | 92.6                      |
| 37                                 | 92.9        | 99.6        | 96.0                      | 37                                 | 95.6        | 92.4        | 97.3                      | 37                                 | 99.3        | 50.0        | 99.2                      | 37                                 | 85.7        | 100.0       | 92.3                      |
| 38                                 | 92.9        | 99.6        | 95.8                      | 38                                 | 95.6        | 92.4        | 97.2                      | 38                                 | 99.3        | 50.0        | 99.1                      | 38                                 | 85.7        | 100.0       | 91.9                      |
| 39                                 | 92.9        | 99.6        | 95.6                      | 39                                 | 95.6        | 92.4        | 97.1                      | 39                                 | 99.3        | 50.0        | 99.1                      | 39                                 | 85.7        | 100.0       | 91.6                      |
| 40                                 | 92.9        | 99.6        | 95.4                      | 40                                 | 95.6        | 92.4        | 96.9                      | 40                                 | 99.3        | 50.0        | 99.1                      | 40                                 | 85.7        | 100.0       | 91.3                      |
| 41                                 | 92.9        | 99.6        | 95.3                      | 41                                 | 95.6        | 92.4        | 96.8                      | 41                                 | 99.3        | 50.0        | 99.0                      | 41                                 | 85.7        | 100.0       | 91.0                      |
| 42                                 | 92.9        | 99.6        | 95.1                      | 42                                 | 95.6        | 92.4        | 96.7                      | 42                                 | 99.3        | 50.0        | 99.0                      | 42                                 | 85.7        | 100.0       | 90.6                      |
| 43                                 | 92.9        | 99.6        | 94.9                      | 43                                 | 95.6        | 92.4        | 96.6                      | 43                                 | 99.3        | 50.0        | 99.0                      | 43                                 | 85.7        | 100.0       | 90.3                      |
| 44                                 | 92.9        | 99.6        | 94.7                      | 44                                 | 95.6        | 92.4        | 96.4                      | 44                                 | 99.3        | 50.0        | 98.9                      | 44                                 | 85.7        | 100.0       | 89.9                      |
| 45                                 | 92.9        | 99.6        | 94.5                      | 45                                 | 95.6        | 92.4        | 96.3                      | 45                                 | 99.3        | 50.0        | 98.9                      | 45                                 | 85.7        | 100.0       | 89.5                      |
| 46                                 | 92.9        | 99.6        | 94.3                      | 46                                 | 95.6        | 92.4        | 96.1                      | 46                                 | 99.3        | 50.0        | 98.8                      | 46                                 | 85.7        | 100.0       | 89.2                      |
| 47                                 | 92.9        | 99.6        | 94.0                      | 47                                 | 95.6        | 92.4        | 96.0                      | 47                                 | 99.3        | 50.0        | 98.8                      | 47                                 | 85.7        | 100.0       | 88.8                      |
| 48                                 | 92.9        | 99.6        | 93.8                      | 48                                 | 95.6        | 92.4        | 95.8                      | 48                                 | 99.3        | 50.0        | 98.7                      | 48                                 | 85.7        | 100.0       | 88.3                      |
| 49                                 | 92.9        | 99.6        | 93.6                      | 49                                 | 95.6        | 92.4        | 95.6                      | 49                                 | 99.3        | 50.0        | 98.7                      | 49                                 | 85.7        | 100.0       | 87.9                      |
| 50                                 | 92.9        | 99.6        | 93.3                      | 50                                 | 95.6        | 92.4        | 95.5                      | 50                                 | 99.3        | 50.0        | 98.6                      | 50                                 | 85.7        | 100.0       | 87.5                      |
| 51                                 | 92.9        | 99.6        | 93.1                      | 51                                 | 95.6        | 92.4        | 95.3                      | 51                                 | 99.3        | 50.0        | 98.6                      | 51                                 | 85.7        | 100.0       | 87.1                      |
| 52                                 | 92.9        | 99.6        | 92.8                      | 52                                 | 95.6        | 92.4        | 95.1                      | 52                                 | 99.3        | 50.0        | 98.5                      | 52                                 | 85.7        | 100.0       | 86.6                      |
| 53                                 | 92.9        | 99.6        | 92.5                      | 53                                 | 95.6        | 92.4        | 94.9                      | 53                                 | 99.3        | 50.0        | 98.4                      | 53                                 | 85.7        | 100.0       | 86.1                      |
| 54                                 | 92.9        | 99.6        | 92.2                      | 54                                 | 95.6        | 92.4        | 94.7                      | 54                                 | 99.3        | 50.0        | 98.4                      | 54                                 | 85.7        | 100.0       | 85.6                      |
| 55                                 | 92.9        | 99.6        | 92.0                      | 55                                 | 95.6        | 92.4        | 94.5                      | 55                                 | 99.3        | 50.0        | 98.3                      | 55                                 | 85.7        | 100.0       | 85.1                      |
| 56                                 | 92.9        | 99.6        | 91.7                      | 56                                 | 95.6        | 92.4        | 94.3                      | 56                                 | 99.3        | 50.0        | 98.2                      | 56                                 | 85.7        | 100.0       | 84.6                      |
| 57                                 | 92.9        | 99.6        | 91.3                      | 57                                 | 95.6        | 92.4        | 94.1                      | 57                                 | 99.3        | 50.0        | 98.2                      | 57                                 | 85.7        | 100.0       | 84.1                      |
| 58                                 | 92.9        | 99.6        | 91.0                      | 58                                 | 95.6        | 92.4        | 93.9                      | 58                                 | 99.3        | 50.0        | 98.1                      | 58                                 | 85.7        | 100.0       | 83.5                      |
| 59                                 | 92.9        | 99.6        | 90.7                      | 59                                 | 95.6        | 92.4        | 93.6                      | 59                                 | 99.3        | 50.0        | 98.0                      | 59                                 | 85.7        | 100.0       | 82.9                      |
| 60                                 | 92.9        | 99.6        | 90.3                      | 60                                 | 95.6        | 92.4        | 93.4                      | 60                                 | 99.3        | 50.0        | 97.9                      | 60                                 | 85.7        | 100.0       | 82.4                      |
| 61                                 | 92.9        | 99.6        | 89.9                      | 61                                 | 95.6        | 92.4        | 93.1                      | 61                                 | 99.3        | 50.0        | 97.8                      | 61                                 | 85.7        | 100.0       | 81.7                      |
| 62                                 | 92.9        | 99.6        | 89.5                      | 62                                 | 95.6        | 92.4        | 92.8                      | 62                                 | 99.3        | 50.0        | 97.8                      | 62                                 | 85.7        | 100.0       | 81.1                      |
| 63                                 | 92.9        | 99.6        | 89.1                      | 63                                 | 95.6        | 92.4        | 92.5                      | 63                                 | 99.3        | 50.0        | 97.7                      | 63                                 | 85.7        | 100.0       | 80.4                      |
| 64                                 | 92.9        | 99.6        | 88.7                      | 64                                 | 95.6        | 92.4        | 92.2                      | 64                                 | 99.3        | 50.0        | 97.6                      | 64                                 | 85.7        | 100.0       | 79.7                      |
| 65                                 | 92.9        | 99.6        | 88.3                      | 65                                 | 95.6        | 92.4        | 91.9                      | 65                                 | 99.3        | 50.0        | 97.5                      | 65                                 | 85.7        | 100.0       | 79.0                      |
| 66                                 | 92.9        | 99.6        | 87.8                      | 66                                 | 95.6        | 92.4        | 91.6                      | 66                                 | 99.3        | 50.0        | 97.3                      | 66                                 | 85.7        | 100.0       | 78.3                      |
| 67                                 | 92.9        | 99.6        | 87.3                      | 67                                 | 95.6        | 92.4        | 91.2                      | 67                                 | 99.3        | 50.0        | 97.2                      | 67                                 | 85.7        | 100.0       | 77.5                      |
| 68                                 | 92.9        | 99.6        | 86.8                      | 68                                 | 95.6        | 92.4        | 90.9                      | 68                                 | 99.3        | 50.0        | 97.1                      | 68                                 | 85.7        | 100.0       | 76.7                      |
| 69                                 | 92.9        | 99.6        | 86.3                      | 69                                 | 95.6        | 92.4        | 90.5                      | 69                                 | 99.3        | 50.0        | 97.0                      | 69                                 | 85.7        | 100.0       | 75.9                      |
| 70                                 | 92.9        | 99.6        | 85.7                      | 70                                 | 95.6        | 92.4        | 90.1                      | 70                                 | 99.3        | 50.0        | 96.8                      | 70                                 | 85.7        | 100.0       | 75.0                      |
| 71                                 | 92.9        | 99.6        | 85.1                      | 71                                 | 95.6        | 92.4        | 89.6                      | 71                                 | 99.3        | 50.0        | 96.7                      | 71                                 | 85.7        | 100.0       | 74.1                      |
| 72                                 | 92.9        | 99.6        | 84.5                      | 72                                 | 95.6        | 92.4        | 89.1                      | 72                                 | 99.3        | 50.0        | 96.5                      | 72                                 | 85.7        | 100.0       | 73.1                      |
| 73                                 | 92.9        | 99.6        | 83.8                      | 73                                 | 95.6        | 92.4        | 88.7                      | 73                                 | 99.3        | 50.0        | 96.3                      | 73                                 | 85.7        | 100.0       | 72.1                      |
| 74                                 | 92.9        | 99.6        | 83.1                      | 74                                 | 95.6        | 92.4        | 88.1                      | 74                                 | 99.3        | 50.0        | 96.2                      | 74                                 | 85.7        | 100.0       | 71.1                      |
| 75                                 | 92.9        | 99.6        | 82.3                      | 75                                 | 95.6        | 92.4        | 87.6                      | 75                                 | 99.3        | 50.0        | 96.0                      | 75                                 | 85.7        | 100.0       | 70.0                      |
| 76                                 | 92.9        | 99.6        | 81.5                      | 76                                 | 95.6        | 92.4        | 87.0                      | 76                                 | 99.3        | 50.0        | 95.7                      | 76                                 | 85.7        | 100.0       | 68.9                      |
| 77                                 | 92.9        | 99.6        | 80.7                      | 77                                 | 95.6        | 92.4        | 86.3                      | 77                                 | 99.3        | 50.0        | 95.5                      | 77                                 | 85.7        | 100.0       | 67.6                      |
| 78                                 | 92.9        | 99.6        | 79.8                      | 78                                 | 95.6        | 92.4        | 85.6                      | 78                                 | 99.3        | 50.0        | 95.3                      | 78                                 | 85.7        | 100.0       | 66.4                      |
| 79                                 | 92.9        | 99.6        | 78.8                      | 79                                 | 95.6        | 92.4        | 84.9                      | 79                                 | 99.3        | 50.0        | 95.0                      | 79                                 | 85.7        | 100.0       | 65.0                      |
| 80                                 | 92.9        | 99.6        | 77.7                      | 80                                 | 95.6        | 92.4        | 84.1                      | 80                                 | 99.3        | 50.0        | 94.7                      | 80                                 | 85.7        | 100.0       | 63.6                      |
| 81                                 | 92.9        | 99.6        | 76.6                      | 81                                 | 95.6        | 92.4        | 83.2                      | 81                                 | 99.3        | 50.0        | 94.3                      | 81                                 | 85.7        | 100.0       | 62.1                      |
| 82                                 | 92.9        | 99.6        | 75.4                      | 82                                 | 95.6        | 92.4        | 82.3                      | 82                                 | 99.3        | 50.0        | 94.0                      | 82                                 | 85.7        | 100.0       | 60.6                      |
| 83                                 | 92.9        | 99.6        | 74.1                      | 83                                 | 95.6        | 92.4        | 81.2                      | 83                                 | 99.3        | 50.0        | 93.6                      | 83                                 | 85.7        | 100.0       | 58.9                      |
| 84                                 | 92.9        | 99.6        | 72.7                      | 84                                 | 95.6        | 92.4        | 80.1                      | 84                                 | 99.3        | 50.0        | 93.1                      | 84                                 | 85.7        | 100.0       | 5                         |

|     |      |      |      |     |      |      |      |     |      |      |      |     |      |       |      |
|-----|------|------|------|-----|------|------|------|-----|------|------|------|-----|------|-------|------|
| 91  | 92.9 | 99.6 | 58.0 | 91  | 95.6 | 92.4 | 67.6 | 91  | 99.3 | 50.0 | 87.6 | 91  | 85.7 | 100.0 | 40.9 |
| 92  | 92.9 | 99.6 | 54.8 | 92  | 95.6 | 92.4 | 64.7 | 92  | 99.3 | 50.0 | 86.1 | 92  | 85.7 | 100.0 | 37.8 |
| 93  | 92.9 | 99.6 | 51.3 | 93  | 95.6 | 92.4 | 61.4 | 93  | 99.3 | 50.0 | 84.3 | 93  | 85.7 | 100.0 | 34.5 |
| 94  | 92.9 | 99.6 | 47.1 | 94  | 95.6 | 92.4 | 57.4 | 94  | 99.3 | 50.0 | 82.0 | 94  | 85.7 | 100.0 | 30.9 |
| 95  | 92.9 | 99.6 | 42.4 | 95  | 95.6 | 92.4 | 52.6 | 95  | 99.3 | 50.0 | 78.9 | 95  | 85.7 | 100.0 | 26.9 |
| 96  | 92.9 | 99.6 | 36.8 | 96  | 95.6 | 92.4 | 46.8 | 96  | 99.3 | 50.0 | 74.8 | 96  | 85.7 | 100.0 | 22.6 |
| 97  | 92.9 | 99.6 | 30.2 | 97  | 95.6 | 92.4 | 39.5 | 97  | 99.3 | 50.0 | 68.8 | 97  | 85.7 | 100.0 | 17.8 |
| 98  | 92.9 | 99.6 | 22.2 | 98  | 95.6 | 92.4 | 30.1 | 98  | 99.3 | 50.0 | 59.2 | 98  | 85.7 | 100.0 | 12.5 |
| 99  | 92.9 | 99.6 | 12.4 | 99  | 95.6 | 92.4 | 17.6 | 99  | 99.3 | 50.0 | 41.8 | 99  | 85.7 | 100.0 | 6.6  |
| 100 | 92.9 | 99.6 | 0.0  | 100 | 95.6 | 92.4 | 0.0  | 100 | 99.3 | 50.0 | 0.0  | 100 | 85.7 | 100.0 | 0.0  |

| <b>-SSR</b>                        |             |             |                           | <b>-RRR</b>                        |             |             |                           | <b>-RSR</b>                        |             |             |                           | <b>-SRR</b>                        |             |             |                           |
|------------------------------------|-------------|-------------|---------------------------|------------------------------------|-------------|-------------|---------------------------|------------------------------------|-------------|-------------|---------------------------|------------------------------------|-------------|-------------|---------------------------|
| Prevalence of isoniazid resistance | Sensitivity | Specificity | Negative Predictive Value | Prevalence of isoniazid resistance | Sensitivity | Specificity | Negative Predictive Value | Prevalence of isoniazid resistance | Sensitivity | Specificity | Negative Predictive Value | Prevalence of isoniazid resistance | Sensitivity | Specificity | Negative Predictive Value |
| 1                                  | 96.0        | 100.0       | 100.0                     | 1                                  | 99.5 n/a    | n/a         | n/a                       | 1                                  | 98.6        | 100.0       | 100.0                     | 1                                  | 100.0 n/a   | n/a         | n/a                       |
| 2                                  | 96.0        | 100.0       | 99.9                      | 2                                  | 99.5 n/a    | n/a         | n/a                       | 2                                  | 98.6        | 100.0       | 100.0                     | 2                                  | 100.0 n/a   | n/a         | n/a                       |
| 3                                  | 96.0        | 100.0       | 99.9                      | 3                                  | 99.5 n/a    | n/a         | n/a                       | 3                                  | 98.6        | 100.0       | 100.0                     | 3                                  | 100.0 n/a   | n/a         | n/a                       |
| 4                                  | 96.0        | 100.0       | 99.8                      | 4                                  | 99.5 n/a    | n/a         | n/a                       | 4                                  | 98.6        | 100.0       | 99.9                      | 4                                  | 100.0 n/a   | n/a         | n/a                       |
| 5                                  | 96.0        | 100.0       | 99.8                      | 5                                  | 99.5 n/a    | n/a         | n/a                       | 5                                  | 98.6        | 100.0       | 99.9                      | 5                                  | 100.0 n/a   | n/a         | n/a                       |
| 6                                  | 96.0        | 100.0       | 99.7                      | 6                                  | 99.5 n/a    | n/a         | n/a                       | 6                                  | 98.6        | 100.0       | 99.9                      | 6                                  | 100.0 n/a   | n/a         | n/a                       |
| 7                                  | 96.0        | 100.0       | 99.7                      | 7                                  | 99.5 n/a    | n/a         | n/a                       | 7                                  | 98.6        | 100.0       | 99.9                      | 7                                  | 100.0 n/a   | n/a         | n/a                       |
| 8                                  | 96.0        | 100.0       | 99.7                      | 8                                  | 99.5 n/a    | n/a         | n/a                       | 8                                  | 98.6        | 100.0       | 99.9                      | 8                                  | 100.0 n/a   | n/a         | n/a                       |
| 9                                  | 96.0        | 100.0       | 99.6                      | 9                                  | 99.5 n/a    | n/a         | n/a                       | 9                                  | 98.6        | 100.0       | 99.9                      | 9                                  | 100.0 n/a   | n/a         | n/a                       |
| 10                                 | 96.0        | 100.0       | 99.6                      | 10                                 | 99.5 n/a    | n/a         | n/a                       | 10                                 | 98.6        | 100.0       | 99.8                      | 10                                 | 100.0 n/a   | n/a         | n/a                       |
| 11                                 | 96.0        | 100.0       | 99.5                      | 11                                 | 99.5 n/a    | n/a         | n/a                       | 11                                 | 98.6        | 100.0       | 99.8                      | 11                                 | 100.0 n/a   | n/a         | n/a                       |
| 12                                 | 96.0        | 100.0       | 99.5                      | 12                                 | 99.5 n/a    | n/a         | n/a                       | 12                                 | 98.6        | 100.0       | 99.8                      | 12                                 | 100.0 n/a   | n/a         | n/a                       |
| 13                                 | 96.0        | 100.0       | 99.4                      | 13                                 | 99.5 n/a    | n/a         | n/a                       | 13                                 | 98.6        | 100.0       | 99.8                      | 13                                 | 100.0 n/a   | n/a         | n/a                       |
| 14                                 | 96.0        | 100.0       | 99.4                      | 14                                 | 99.5 n/a    | n/a         | n/a                       | 14                                 | 98.6        | 100.0       | 99.8                      | 14                                 | 100.0 n/a   | n/a         | n/a                       |
| 15                                 | 96.0        | 100.0       | 99.3                      | 15                                 | 99.5 n/a    | n/a         | n/a                       | 15                                 | 98.6        | 100.0       | 99.8                      | 15                                 | 100.0 n/a   | n/a         | n/a                       |
| 16                                 | 96.0        | 100.0       | 99.2                      | 16                                 | 99.5 n/a    | n/a         | n/a                       | 16                                 | 98.6        | 100.0       | 99.7                      | 16                                 | 100.0 n/a   | n/a         | n/a                       |
| 17                                 | 96.0        | 100.0       | 99.2                      | 17                                 | 99.5 n/a    | n/a         | n/a                       | 17                                 | 98.6        | 100.0       | 99.7                      | 17                                 | 100.0 n/a   | n/a         | n/a                       |
| 18                                 | 96.0        | 100.0       | 99.1                      | 18                                 | 99.5 n/a    | n/a         | n/a                       | 18                                 | 98.6        | 100.0       | 99.7                      | 18                                 | 100.0 n/a   | n/a         | n/a                       |
| 19                                 | 96.0        | 100.0       | 99.1                      | 19                                 | 99.5 n/a    | n/a         | n/a                       | 19                                 | 98.6        | 100.0       | 99.7                      | 19                                 | 100.0 n/a   | n/a         | n/a                       |
| 20                                 | 96.0        | 100.0       | 99.0                      | 20                                 | 99.5 n/a    | n/a         | n/a                       | 20                                 | 98.6        | 100.0       | 99.6                      | 20                                 | 100.0 n/a   | n/a         | n/a                       |
| 21                                 | 96.0        | 100.0       | 98.9                      | 21                                 | 99.5 n/a    | n/a         | n/a                       | 21                                 | 98.6        | 100.0       | 99.6                      | 21                                 | 100.0 n/a   | n/a         | n/a                       |
| 22                                 | 96.0        | 100.0       | 98.9                      | 22                                 | 99.5 n/a    | n/a         | n/a                       | 22                                 | 98.6        | 100.0       | 99.6                      | 22                                 | 100.0 n/a   | n/a         | n/a                       |
| 23                                 | 96.0        | 100.0       | 98.8                      | 23                                 | 99.5 n/a    | n/a         | n/a                       | 23                                 | 98.6        | 100.0       | 99.6                      | 23                                 | 100.0 n/a   | n/a         | n/a                       |
| 24                                 | 96.0        | 100.0       | 98.8                      | 24                                 | 99.5 n/a    | n/a         | n/a                       | 24                                 | 98.6        | 100.0       | 99.6                      | 24                                 | 100.0 n/a   | n/a         | n/a                       |
| 25                                 | 96.0        | 100.0       | 98.7                      | 25                                 | 99.5 n/a    | n/a         | n/a                       | 25                                 | 98.6        | 100.0       | 99.5                      | 25                                 | 100.0 n/a   | n/a         | n/a                       |
| 26                                 | 96.0        | 100.0       | 98.6                      | 26                                 | 99.5 n/a    | n/a         | n/a                       | 26                                 | 98.6        | 100.0       | 99.5                      | 26                                 | 100.0 n/a   | n/a         | n/a                       |
| 27                                 | 96.0        | 100.0       | 98.5                      | 27                                 | 99.5 n/a    | n/a         | n/a                       | 27                                 | 98.6        | 100.0       | 99.5                      | 27                                 | 100.0 n/a   | n/a         | n/a                       |
| 28                                 | 96.0        | 100.0       | 98.5                      | 28                                 | 99.5 n/a    | n/a         | n/a                       | 28                                 | 98.6        | 100.0       | 99.5                      | 28                                 | 100.0 n/a   | n/a         | n/a                       |
| 29                                 | 96.0        | 100.0       | 98.4                      | 29                                 | 99.5 n/a    | n/a         | n/a                       | 29                                 | 98.6        | 100.0       | 99.4                      | 29                                 | 100.0 n/a   | n/a         | n/a                       |
| 30                                 | 96.0        | 100.0       | 98.3                      | 30                                 | 99.5 n/a    | n/a         | n/a                       | 30                                 | 98.6        | 100.0       | 99.4                      | 30                                 | 100.0 n/a   | n/a         | n/a                       |
| 31                                 | 96.0        | 100.0       | 98.2                      | 31                                 | 99.5 n/a    | n/a         | n/a                       | 31                                 | 98.6        | 100.0       | 99.4                      | 31                                 | 100.0 n/a   | n/a         | n/a                       |
| 32                                 | 96.0        | 100.0       | 98.2                      | 32                                 | 99.5 n/a    | n/a         | n/a                       | 32                                 | 98.6        | 100.0       | 99.4                      | 32                                 | 100.0 n/a   | n/a         | n/a                       |
| 33                                 | 96.0        | 100.0       | 98.1                      | 33                                 | 99.5 n/a    | n/a         | n/a                       | 33                                 | 98.6        | 100.0       | 99.3                      | 33                                 | 100.0 n/a   | n/a         | n/a                       |
| 34                                 | 96.0        | 100.0       | 98.0                      | 34                                 | 99.5 n/a    | n/a         | n/a                       | 34                                 | 98.6        | 100.0       | 99.3                      | 34                                 | 100.0 n/a   | n/a         | n/a                       |
| 35                                 | 96.0        | 100.0       | 97.9                      | 35                                 | 99.5 n/a    | n/a         | n/a                       | 35                                 | 98.6        | 100.0       | 99.3                      | 35                                 | 100.0 n/a   | n/a         | n/a                       |
| 36                                 | 96.0        | 100.0       | 97.8                      | 36                                 | 99.5 n/a    | n/a         | n/a                       | 36                                 | 98.6        | 100.0       | 99.2                      | 36                                 | 100.0 n/a   | n/a         | n/a                       |
| 37                                 | 96.0        | 100.0       | 97.7                      | 37                                 | 99.5 n/a    | n/a         | n/a                       | 37                                 | 98.6        | 100.0       | 99.2                      | 37                                 | 100.0 n/a   | n/a         | n/a                       |
| 38                                 | 96.0        | 100.0       | 97.6                      | 38                                 | 99.5 n/a    | n/a         | n/a                       | 38                                 | 98.6        | 100.0       | 99.2                      | 38                                 | 100.0 n/a   | n/a         | n/a                       |
| 39                                 | 96.0        | 100.0       | 97.5                      | 39                                 | 99.5 n/a    | n/a         | n/a                       | 39                                 | 98.6        | 100.0       | 99.1                      | 39                                 | 100.0 n/a   | n/a         | n/a                       |
| 40                                 | 96.0        | 100.0       | 97.4                      | 40                                 | 99.5 n/a    | n/a         | n/a                       | 40                                 | 98.6        | 100.0       | 99.1                      | 40                                 | 100.0 n/a   | n/a         | n/a                       |
| 41                                 | 96.0        | 100.0       | 97.3                      | 41                                 | 99.5 n/a    | n/a         | n/a                       | 41                                 | 98.6        | 100.0       | 99.1                      | 41                                 | 100.0 n/a   | n/a         | n/a                       |
| 42                                 | 96.0        | 100.0       | 97.2                      | 42                                 | 99.5 n/a    | n/a         | n/a                       | 42                                 | 98.6        | 100.0       | 99.0                      | 42                                 | 100.0 n/a   | n/a         | n/a                       |
| 43                                 | 96.0        | 100.0       | 97.1                      | 43                                 | 99.5 n/a    | n/a         | n/a                       | 43                                 | 98.6        | 100.0       | 99.0                      | 43                                 | 100.0 n/a   | n/a         | n/a                       |
| 44                                 | 96.0        | 100.0       | 97.0                      | 44                                 | 99.5 n/a    | n/a         | n/a                       | 44                                 | 98.6        | 100.0       | 98.9                      | 44                                 | 100.0 n/a   | n/a         | n/a                       |
| 45                                 | 96.0        | 100.0       | 96.8                      | 45                                 | 99.5 n/a    | n/a         | n/a                       | 45                                 | 98.6        | 100.0       | 98.9                      | 45                                 | 100.0 n/a   | n/a         | n/a                       |
| 46                                 | 96.0        | 100.0       | 96.7                      | 46                                 | 99.5 n/a    | n/a         | n/a                       | 46                                 | 98.6        | 100.0       | 98.9                      | 46                                 | 100.0 n/a   | n/a         | n/a                       |
| 47                                 | 96.0        | 100.0       | 96.6                      | 47                                 | 99.5 n/a    | n/a         | n/a                       | 47                                 | 98.6        | 100.0       | 98.8                      | 47                                 | 100.0 n/a   | n/a         | n/a                       |
| 48                                 | 96.0        | 100.0       | 96.4                      | 48                                 | 99.5 n/a    | n/a         | n/a                       | 48                                 | 98.6        | 100.0       | 98.8                      | 48                                 | 100.0 n/a   | n/a         | n/a                       |
| 49                                 | 96.0        | 100.0       | 96.3                      | 49                                 | 99.5 n/a    | n/a         | n/a                       | 49                                 | 98.6        | 100.0       | 98.7                      | 49                                 | 100.0 n/a   | n/a         | n/a                       |
| 50                                 | 96.0        | 100.0       | 96.2                      | 50                                 | 99.5 n/a    | n/a         | n/a                       | 50                                 | 98.6        | 100.0       | 98.7                      | 50                                 | 100.0 n/a   | n/a         | n/a                       |
| 51                                 | 96.0        | 100.0       | 96.0                      | 51                                 | 99.5 n/a    | n/a         | n/a                       | 51                                 | 98.6        | 100.0       | 98.6                      | 51                                 | 100.0 n/a   | n/a         | n/a                       |
| 52                                 | 96.0        | 100.0       | 95.8                      | 52                                 | 99.5 n/a    | n/a         | n/a                       | 52                                 | 98.6        | 100.0       | 98.5                      | 52                                 | 100.0 n/a   | n/a         | n/a                       |
| 53                                 | 96.0        | 100.0       | 95.7                      | 53                                 | 99.5 n/a    | n/a         | n/a                       | 53                                 | 98.6        | 100.0       | 98.5                      | 53                                 | 100.0 n/a   | n/a         | n/a                       |
| 54                                 | 96.0        | 100.0       | 95.5                      | 54                                 | 99.5 n/a    | n/a         | n/a                       | 54                                 | 98.6        | 100.0       | 98.4                      | 54                                 | 100.0 n/a   | n/a         | n/a                       |
| 55                                 | 96.0        | 100.0       | 95.3                      | 55                                 | 99.5 n/a    | n/a         | n/a                       | 55                                 | 98.6        | 100.0       | 98.4                      | 55                                 | 100.0 n/a   | n/a         | n/a                       |
| 56                                 | 96.0        | 100.0       | 95.2                      | 56                                 | 99.5 n/a    | n/a         | n/a                       | 56                                 | 98.6        | 100.0       | 98.3                      | 56                                 | 100.0 n/a   | n/a         | n/a                       |
| 57                                 | 96.0        | 100.0       | 95.0                      | 57                                 | 99.5 n/a    | n/a         | n/a                       | 57                                 | 98.6        | 100.0       | 98.2                      | 57                                 | 100.0 n/a   | n/a         | n/a                       |
| 58                                 | 96.0        | 100.0       | 94.8                      | 58                                 | 99.5 n/a    | n/a         | n/a                       | 58                                 | 98.6        | 100.0       | 98.2                      | 58                                 | 100.0 n/a   | n/a         | n/a                       |
| 59                                 | 96.0        | 100.0       | 94.6                      | 59                                 | 99.5 n/a    | n/a         | n/a                       | 59                                 | 98.6        | 100.0       | 98.1                      | 59                                 | 100.0 n/a   | n/a         | n/a                       |
| 60                                 | 96.0        | 100.0       | 94.3                      | 60                                 | 99.5 n/a    | n/a         | n/a                       | 60                                 | 98.6        | 100.0       | 98.0                      | 60                                 | 100.0 n/a   | n/a         | n/a                       |
| 61                                 | 96.0        | 100.0       | 94.1                      | 61                                 | 99.5 n/a    | n/a         | n/a                       | 61                                 | 98.6        | 100.0       | 97.9                      | 61                                 | 100.0 n/a   | n/a         | n/a                       |
| 62                                 | 96.0        | 100.0       | 93.9                      | 62                                 | 99.5 n/a    | n/a         | n/a                       | 62                                 | 98.6        | 100.0       | 97.8                      | 62                                 | 100.0 n/a   | n/a         | n/a                       |
| 63                                 | 96.0        | 100.0       | 93.6                      | 63                                 | 99.5 n/a    | n/a         | n/a                       | 63                                 | 98.6        | 100.0       | 97.7                      | 63                                 | 100.0 n/a   | n/a         | n/a                       |
| 64                                 | 96.0        | 100.0       | 93.4                      | 64                                 | 99.5 n/a    | n/a         | n/a                       | 64                                 | 98.6        | 100.0       | 97.6                      | 64                                 | 100.0 n/a   | n/a         | n/a                       |
| 65                                 | 96.0        | 100.0       | 93.1                      | 65                                 | 99.5 n/a    | n/a         | n/a                       | 65                                 | 98.6        | 100.0       | 97.5                      | 65                                 | 100.0 n/a   | n/a         | n/a                       |
| 66                                 | 96.0        | 100.0       | 92.8                      | 66                                 | 99.5 n/a    | n/a         | n/a                       | 66                                 | 98.6        | 100.0       | 97.4                      | 66                                 | 100.0 n/a   | n/a         | n/a                       |
| 67                                 | 96.0        | 100.0       | 92.5                      | 67                                 | 99.5 n/a    | n/a         | n/a                       | 67                                 | 98.6        | 100.0       | 97.3                      | 67                                 | 100.0 n/a   | n/a         | n/a                       |
| 68                                 | 96.0        | 100.0       | 92.2                      | 68                                 | 99.5 n/a    | n/a         | n/a                       | 68                                 | 98.6        | 100.0       | 97.2                      | 68                                 | 100.0 n/a   | n/a         | n/a                       |
| 69                                 | 96.0        | 100.0       | 91.8                      | 69                                 | 99.5 n/a    | n/a         | n/a                       | 69                                 | 98.6        | 100.0       | 97.1                      | 69                                 | 100.0 n/a   | n/a         | n/a                       |
| 70                                 | 96.0        | 100.0       | 91.5                      | 70                                 | 99.5 n/a    | n/a         | n/a                       | 70                                 | 98.6        | 100.0       | 96.9                      | 70                                 | 100.0 n/a   | n/a         | n/a                       |
| 71                                 | 96.0        | 100.0       | 91.1                      | 71                                 | 99.5 n/a    | n/a         | n/a                       | 71                                 | 98.6        | 100.0       | 96.8                      | 71                                 | 100.0 n/a   | n/a         | n/a                       |
| 72                                 | 96.0        | 100.0       | 90.7                      | 72                                 | 99.5 n/a    | n/a         | n/a                       | 72                                 | 98.6        | 100.0       | 96.6                      | 72                                 | 100.0 n/a   | n/a         | n/a                       |
| 73                                 | 96.0        | 100.0       | 90.2                      | 73                                 | 99.5 n/a    | n/a         | n/a                       | 73                                 | 98.6        | 100.0       | 96.4                      | 73                                 | 100.0 n/a   | n/a         | n/a                       |
| 74                                 | 96.0        | 100.0       | 89.8                      | 74                                 | 99.5 n/a    | n/a         | n/a                       | 74                                 | 98.6        | 100.0       | 96.3                      | 74                                 | 100.0 n/a   | n/a         | n/a                       |
| 75                                 | 96.0        | 100.0       | 89.3                      | 75                                 | 99.5 n/a    | n/a         | n/a                       | 75                                 | 98.6        | 100.0       | 96.1                      | 75                                 | 100.0 n/a   | n/a         | n/a                       |
| 76                                 | 96.0        | 100.0       | 88.8                      | 76                                 | 99.5 n/a    | n/a         | n/a                       | 76                                 | 98.6        | 100.0       | 95.9                      | 76                                 | 100.0 n/a   | n/a         | n/a                       |
| 77                                 | 96.0        | 100.0       | 88.2                      | 77                                 | 99.5 n/a    | n/a         | n/a                       | 77                                 | 98.6        | 100.0       | 95.6                      | 77                                 | 100.0 n/a   | n/a         | n/a                       |
| 78                                 | 96.0        | 100.0       | 87.6                      | 78                                 | 99.5 n/a    | n/a         | n/a                       | 78                                 | 98.6        | 100.0       | 95.4                      | 78                                 | 100.0 n/a   | n/a         | n/a                       |
| 79                                 | 96.0        | 100.0       | 86.9                      | 79                                 | 99.5 n/a    | n/a         | n                         |                                    |             |             |                           |                                    |             |             |                           |

|     |      |       |      |     |          |     |     |      |       |      |     |           |     |
|-----|------|-------|------|-----|----------|-----|-----|------|-------|------|-----|-----------|-----|
| 83  | 96.0 | 100.0 | 83.7 | 83  | 99.5 n/a | n/a | 83  | 98.6 | 100.0 | 93.8 | 83  | 100.0 n/a | n/a |
| 84  | 96.0 | 100.0 | 82.6 | 84  | 99.5 n/a | n/a | 84  | 98.6 | 100.0 | 93.3 | 84  | 100.0 n/a | n/a |
| 85  | 96.0 | 100.0 | 81.5 | 85  | 99.5 n/a | n/a | 85  | 98.6 | 100.0 | 92.8 | 85  | 100.0 n/a | n/a |
| 86  | 96.0 | 100.0 | 80.3 | 86  | 99.5 n/a | n/a | 86  | 98.6 | 100.0 | 92.3 | 86  | 100.0 n/a | n/a |
| 87  | 96.0 | 100.0 | 78.9 | 87  | 99.5 n/a | n/a | 87  | 98.6 | 100.0 | 91.6 | 87  | 100.0 n/a | n/a |
| 88  | 96.0 | 100.0 | 77.3 | 88  | 99.5 n/a | n/a | 88  | 98.6 | 100.0 | 90.9 | 88  | 100.0 n/a | n/a |
| 89  | 96.0 | 100.0 | 75.5 | 89  | 99.5 n/a | n/a | 89  | 98.6 | 100.0 | 90.1 | 89  | 100.0 n/a | n/a |
| 90  | 96.0 | 100.0 | 73.5 | 90  | 99.5 n/a | n/a | 90  | 98.6 | 100.0 | 89.1 | 90  | 100.0 n/a | n/a |
| 91  | 96.0 | 100.0 | 71.2 | 91  | 99.5 n/a | n/a | 91  | 98.6 | 100.0 | 87.9 | 91  | 100.0 n/a | n/a |
| 92  | 96.0 | 100.0 | 68.5 | 92  | 99.5 n/a | n/a | 92  | 98.6 | 100.0 | 86.4 | 92  | 100.0 n/a | n/a |
| 93  | 96.0 | 100.0 | 65.3 | 93  | 99.5 n/a | n/a | 93  | 98.6 | 100.0 | 84.7 | 93  | 100.0 n/a | n/a |
| 94  | 96.0 | 100.0 | 61.5 | 94  | 99.5 n/a | n/a | 94  | 98.6 | 100.0 | 82.4 | 94  | 100.0 n/a | n/a |
| 95  | 96.0 | 100.0 | 56.8 | 95  | 99.5 n/a | n/a | 95  | 98.6 | 100.0 | 79.4 | 95  | 100.0 n/a | n/a |
| 96  | 96.0 | 100.0 | 51.0 | 96  | 99.5 n/a | n/a | 96  | 98.6 | 100.0 | 75.3 | 96  | 100.0 n/a | n/a |
| 97  | 96.0 | 100.0 | 43.6 | 97  | 99.5 n/a | n/a | 97  | 98.6 | 100.0 | 69.4 | 97  | 100.0 n/a | n/a |
| 98  | 96.0 | 100.0 | 33.8 | 98  | 99.5 n/a | n/a | 98  | 98.6 | 100.0 | 59.9 | 98  | 100.0 n/a | n/a |
| 99  | 96.0 | 100.0 | 20.2 | 99  | 99.5 n/a | n/a | 99  | 98.6 | 100.0 | 42.6 | 99  | 100.0 n/a | n/a |
| 100 | 96.0 | 100.0 | 0.0  | 100 | 99.5 n/a | n/a | 100 | 98.6 | 100.0 | 0.0  | 100 | 100.0 n/a | n/a |

| <u>S-SS</u>                         |             |             |                           | <u>S-RS</u>                         |             |             |                           | <u>S-SR</u>                         |             |             |                           | <u>S-RR</u>                         |             |             |                           |
|-------------------------------------|-------------|-------------|---------------------------|-------------------------------------|-------------|-------------|---------------------------|-------------------------------------|-------------|-------------|---------------------------|-------------------------------------|-------------|-------------|---------------------------|
| Prevalence of rifampicin resistance | Sensitivity | Specificity | Negative Predictive Value | Prevalence of rifampicin resistance | Sensitivity | Specificity | Negative Predictive Value | Prevalence of rifampicin resistance | Sensitivity | Specificity | Negative Predictive Value | Prevalence of rifampicin resistance | Sensitivity | Specificity | Negative Predictive Value |
| 1                                   | 82.2        | 99.4        | 99.8                      | 1                                   | 100.0       | 90.0        | 100.0                     | 1                                   | 33.3        | 100.0       | 99.3                      | 1                                   | n/a         | n/a         | n/a                       |
| 2                                   | 82.2        | 99.4        | 99.6                      | 2                                   | 100.0       | 90.0        | 100.0                     | 2                                   | 33.3        | 100.0       | 98.7                      | 2                                   | n/a         | n/a         | n/a                       |
| 3                                   | 82.2        | 99.4        | 99.4                      | 3                                   | 100.0       | 90.0        | 100.0                     | 3                                   | 33.3        | 100.0       | 98.0                      | 3                                   | n/a         | n/a         | n/a                       |
| 4                                   | 82.2        | 99.4        | 99.3                      | 4                                   | 100.0       | 90.0        | 100.0                     | 4                                   | 33.3        | 100.0       | 97.3                      | 4                                   | n/a         | n/a         | n/a                       |
| 5                                   | 82.2        | 99.4        | 99.1                      | 5                                   | 100.0       | 90.0        | 100.0                     | 5                                   | 33.3        | 100.0       | 96.6                      | 5                                   | n/a         | n/a         | n/a                       |
| 6                                   | 82.2        | 99.4        | 98.9                      | 6                                   | 100.0       | 90.0        | 100.0                     | 6                                   | 33.3        | 100.0       | 95.9                      | 6                                   | n/a         | n/a         | n/a                       |
| 7                                   | 82.2        | 99.4        | 98.7                      | 7                                   | 100.0       | 90.0        | 100.0                     | 7                                   | 33.3        | 100.0       | 95.2                      | 7                                   | n/a         | n/a         | n/a                       |
| 8                                   | 82.2        | 99.4        | 98.5                      | 8                                   | 100.0       | 90.0        | 100.0                     | 8                                   | 33.3        | 100.0       | 94.5                      | 8                                   | n/a         | n/a         | n/a                       |
| 9                                   | 82.2        | 99.4        | 98.3                      | 9                                   | 100.0       | 90.0        | 100.0                     | 9                                   | 33.3        | 100.0       | 93.8                      | 9                                   | n/a         | n/a         | n/a                       |
| 10                                  | 82.2        | 99.4        | 98.1                      | 10                                  | 100.0       | 90.0        | 100.0                     | 10                                  | 33.3        | 100.0       | 93.1                      | 10                                  | n/a         | n/a         | n/a                       |
| 11                                  | 82.2        | 99.4        | 97.8                      | 11                                  | 100.0       | 90.0        | 100.0                     | 11                                  | 33.3        | 100.0       | 92.4                      | 11                                  | n/a         | n/a         | n/a                       |
| 12                                  | 82.2        | 99.4        | 97.6                      | 12                                  | 100.0       | 90.0        | 100.0                     | 12                                  | 33.3        | 100.0       | 91.7                      | 12                                  | n/a         | n/a         | n/a                       |
| 13                                  | 82.2        | 99.4        | 97.4                      | 13                                  | 100.0       | 90.0        | 100.0                     | 13                                  | 33.3        | 100.0       | 90.9                      | 13                                  | n/a         | n/a         | n/a                       |
| 14                                  | 82.2        | 99.4        | 97.2                      | 14                                  | 100.0       | 90.0        | 100.0                     | 14                                  | 33.3        | 100.0       | 90.2                      | 14                                  | n/a         | n/a         | n/a                       |
| 15                                  | 82.2        | 99.4        | 96.9                      | 15                                  | 100.0       | 90.0        | 100.0                     | 15                                  | 33.3        | 100.0       | 89.5                      | 15                                  | n/a         | n/a         | n/a                       |
| 16                                  | 82.2        | 99.4        | 96.7                      | 16                                  | 100.0       | 90.0        | 100.0                     | 16                                  | 33.3        | 100.0       | 88.7                      | 16                                  | n/a         | n/a         | n/a                       |
| 17                                  | 82.2        | 99.4        | 96.5                      | 17                                  | 100.0       | 90.0        | 100.0                     | 17                                  | 33.3        | 100.0       | 88.0                      | 17                                  | n/a         | n/a         | n/a                       |
| 18                                  | 82.2        | 99.4        | 96.2                      | 18                                  | 100.0       | 90.0        | 100.0                     | 18                                  | 33.3        | 100.0       | 87.2                      | 18                                  | n/a         | n/a         | n/a                       |
| 19                                  | 82.2        | 99.4        | 96.0                      | 19                                  | 100.0       | 90.0        | 100.0                     | 19                                  | 33.3        | 100.0       | 86.5                      | 19                                  | n/a         | n/a         | n/a                       |
| 20                                  | 82.2        | 99.4        | 95.7                      | 20                                  | 100.0       | 90.0        | 100.0                     | 20                                  | 33.3        | 100.0       | 85.7                      | 20                                  | n/a         | n/a         | n/a                       |
| 21                                  | 82.2        | 99.4        | 95.5                      | 21                                  | 100.0       | 90.0        | 100.0                     | 21                                  | 33.3        | 100.0       | 84.9                      | 21                                  | n/a         | n/a         | n/a                       |
| 22                                  | 82.2        | 99.4        | 95.2                      | 22                                  | 100.0       | 90.0        | 100.0                     | 22                                  | 33.3        | 100.0       | 84.2                      | 22                                  | n/a         | n/a         | n/a                       |
| 23                                  | 82.2        | 99.4        | 94.9                      | 23                                  | 100.0       | 90.0        | 100.0                     | 23                                  | 33.3        | 100.0       | 83.4                      | 23                                  | n/a         | n/a         | n/a                       |
| 24                                  | 82.2        | 99.4        | 94.7                      | 24                                  | 100.0       | 90.0        | 100.0                     | 24                                  | 33.3        | 100.0       | 82.6                      | 24                                  | n/a         | n/a         | n/a                       |
| 25                                  | 82.2        | 99.4        | 94.4                      | 25                                  | 100.0       | 90.0        | 100.0                     | 25                                  | 33.3        | 100.0       | 81.8                      | 25                                  | n/a         | n/a         | n/a                       |
| 26                                  | 82.2        | 99.4        | 94.1                      | 26                                  | 100.0       | 90.0        | 100.0                     | 26                                  | 33.3        | 100.0       | 81.0                      | 26                                  | n/a         | n/a         | n/a                       |
| 27                                  | 82.2        | 99.4        | 93.8                      | 27                                  | 100.0       | 90.0        | 100.0                     | 27                                  | 33.3        | 100.0       | 80.2                      | 27                                  | n/a         | n/a         | n/a                       |
| 28                                  | 82.2        | 99.4        | 93.5                      | 28                                  | 100.0       | 90.0        | 100.0                     | 28                                  | 33.3        | 100.0       | 79.4                      | 28                                  | n/a         | n/a         | n/a                       |
| 29                                  | 82.2        | 99.4        | 93.2                      | 29                                  | 100.0       | 90.0        | 100.0                     | 29                                  | 33.3        | 100.0       | 78.6                      | 29                                  | n/a         | n/a         | n/a                       |
| 30                                  | 82.2        | 99.4        | 92.9                      | 30                                  | 100.0       | 90.0        | 100.0                     | 30                                  | 33.3        | 100.0       | 77.8                      | 30                                  | n/a         | n/a         | n/a                       |
| 31                                  | 82.2        | 99.4        | 92.6                      | 31                                  | 100.0       | 90.0        | 100.0                     | 31                                  | 33.3        | 100.0       | 77.0                      | 31                                  | n/a         | n/a         | n/a                       |
| 32                                  | 82.2        | 99.4        | 92.2                      | 32                                  | 100.0       | 90.0        | 100.0                     | 32                                  | 33.3        | 100.0       | 76.1                      | 32                                  | n/a         | n/a         | n/a                       |
| 33                                  | 82.2        | 99.4        | 91.9                      | 33                                  | 100.0       | 90.0        | 100.0                     | 33                                  | 33.3        | 100.0       | 75.3                      | 33                                  | n/a         | n/a         | n/a                       |
| 34                                  | 82.2        | 99.4        | 91.6                      | 34                                  | 100.0       | 90.0        | 100.0                     | 34                                  | 33.3        | 100.0       | 74.4                      | 34                                  | n/a         | n/a         | n/a                       |
| 35                                  | 82.2        | 99.4        | 91.2                      | 35                                  | 100.0       | 90.0        | 100.0                     | 35                                  | 33.3        | 100.0       | 73.6                      | 35                                  | n/a         | n/a         | n/a                       |
| 36                                  | 82.2        | 99.4        | 90.9                      | 36                                  | 100.0       | 90.0        | 100.0                     | 36                                  | 33.3        | 100.0       | 72.7                      | 36                                  | n/a         | n/a         | n/a                       |
| 37                                  | 82.2        | 99.4        | 90.5                      | 37                                  | 100.0       | 90.0        | 100.0                     | 37                                  | 33.3        | 100.0       | 71.9                      | 37                                  | n/a         | n/a         | n/a                       |
| 38                                  | 82.2        | 99.4        | 90.1                      | 38                                  | 100.0       | 90.0        | 100.0                     | 38                                  | 33.3        | 100.0       | 71.0                      | 38                                  | n/a         | n/a         | n/a                       |
| 39                                  | 82.2        | 99.4        | 89.7                      | 39                                  | 100.0       | 90.0        | 100.0                     | 39                                  | 33.3        | 100.0       | 70.1                      | 39                                  | n/a         | n/a         | n/a                       |
| 40                                  | 82.2        | 99.4        | 89.3                      | 40                                  | 100.0       | 90.0        | 100.0                     | 40                                  | 33.3        | 100.0       | 69.2                      | 40                                  | n/a         | n/a         | n/a                       |
| 41                                  | 82.2        | 99.4        | 88.9                      | 41                                  | 100.0       | 90.0        | 100.0                     | 41                                  | 33.3        | 100.0       | 68.3                      | 41                                  | n/a         | n/a         | n/a                       |
| 42                                  | 82.2        | 99.4        | 88.5                      | 42                                  | 100.0       | 90.0        | 100.0                     | 42                                  | 33.3        | 100.0       | 67.4                      | 42                                  | n/a         | n/a         | n/a                       |
| 43                                  | 82.2        | 99.4        | 88.1                      | 43                                  | 100.0       | 90.0        | 100.0                     | 43                                  | 33.3        | 100.0       | 66.5                      | 43                                  | n/a         | n/a         | n/a                       |
| 44                                  | 82.2        | 99.4        | 87.7                      | 44                                  | 100.0       | 90.0        | 100.0                     | 44                                  | 33.3        | 100.0       | 65.6                      | 44                                  | n/a         | n/a         | n/a                       |
| 45                                  | 82.2        | 99.4        | 87.2                      | 45                                  | 100.0       | 90.0        | 100.0                     | 45                                  | 33.3        | 100.0       | 64.7                      | 45                                  | n/a         | n/a         | n/a                       |
| 46                                  | 82.2        | 99.4        | 86.8                      | 46                                  | 100.0       | 90.0        | 100.0                     | 46                                  | 33.3        | 100.0       | 63.8                      | 46                                  | n/a         | n/a         | n/a                       |
| 47                                  | 82.2        | 99.4        | 86.3                      | 47                                  | 100.0       | 90.0        | 100.0                     | 47                                  | 33.3        | 100.0       | 62.8                      | 47                                  | n/a         | n/a         | n/a                       |
| 48                                  | 82.2        | 99.4        | 85.8                      | 48                                  | 100.0       | 90.0        | 100.0                     | 48                                  | 33.3        | 100.0       | 61.9                      | 48                                  | n/a         | n/a         | n/a                       |
| 49                                  | 82.2        | 99.4        | 85.3                      | 49                                  | 100.0       | 90.0        | 100.0                     | 49                                  | 33.3        | 100.0       | 61.0                      | 49                                  | n/a         | n/a         | n/a                       |
| 50                                  | 82.2        | 99.4        | 84.8                      | 50                                  | 100.0       | 90.0        | 100.0                     | 50                                  | 33.3        | 100.0       | 60.0                      | 50                                  | n/a         | n/a         | n/a                       |
| 51                                  | 82.2        | 99.4        | 84.3                      | 51                                  | 100.0       | 90.0        | 100.0                     | 51                                  | 33.3        | 100.0       | 59.0                      | 51                                  | n/a         | n/a         | n/a                       |
| 52                                  | 82.2        | 99.4        | 83.8                      | 52                                  | 100.0       | 90.0        | 100.0                     | 52                                  | 33.3        | 100.0       | 58.1                      | 52                                  | n/a         | n/a         | n/a                       |
| 53                                  | 82.2        | 99.4        | 83.2                      | 53                                  | 100.0       | 90.0        | 100.0                     | 53                                  | 33.3        | 100.0       | 57.1                      | 53                                  | n/a         | n/a         | n/a                       |
| 54                                  | 82.2        | 99.4        | 82.6                      | 54                                  | 100.0       | 90.0        | 100.0                     | 54                                  | 33.3        | 100.0       | 56.1                      | 54                                  | n/a         | n/a         | n/a                       |
| 55                                  | 82.2        | 99.4        | 82.1                      | 55                                  | 100.0       | 90.0        | 100.0                     | 55                                  | 33.3        | 100.0       | 55.1                      | 55                                  | n/a         | n/a         | n/a                       |
| 56                                  | 82.2        | 99.4        | 81.5                      | 56                                  | 100.0       | 90.0        | 100.0                     | 56                                  | 33.3        | 100.0       | 54.1                      | 56                                  | n/a         | n/a         | n/a                       |
| 57                                  | 82.2        | 99.4        | 80.8                      | 57                                  | 100.0       | 90.0        | 100.0                     | 57                                  | 33.3        | 100.0       | 53.1                      | 57                                  | n/a         | n/a         | n/a                       |
| 58                                  | 82.2        | 99.4        | 80.2                      | 58                                  | 100.0       | 90.0        | 100.0                     | 58                                  | 33.3        | 100.0       | 52.1                      | 58                                  | n/a         | n/a         | n/a                       |
| 59                                  | 82.2        | 99.4        | 79.5                      | 59                                  | 100.0       | 90.0        | 100.0                     | 59                                  | 33.3        | 100.0       | 51.0                      | 59                                  | n/a         | n/a         | n/a                       |
| 60                                  | 82.2        | 99.4        | 78.8                      | 60                                  | 100.0       | 90.0        | 100.0                     | 60                                  | 33.3        | 100.0       | 50.0                      | 60                                  | n/a         | n/a         | n/a                       |
| 61                                  | 82.2        | 99.4        | 78.1                      | 61                                  | 100.0       | 90.0        | 100.0                     | 61                                  | 33.3        | 100.0       | 49.0                      | 61                                  | n/a         | n/a         | n/a                       |
| 62                                  | 82.2        | 99.4        | 77.4                      | 62                                  | 100.0       | 90.0        | 100.0                     | 62                                  | 33.3        | 100.0       | 47.9                      | 62                                  | n/a         | n/a         | n/a                       |
| 63                                  | 82.2        | 99.4        | 76.6                      | 63                                  | 100.0       | 90.0        | 100.0                     | 63                                  | 33.3        | 100.0       | 46.8                      | 63                                  | n/a         | n/a         | n/a                       |
| 64                                  | 82.2        | 99.4        | 75.9                      | 64                                  | 100.0       | 90.0        | 100.0                     | 64                                  | 33.3        | 100.0       | 45.8                      | 64                                  | n/a         | n/a         | n/a                       |
| 65                                  | 82.2        | 99.4        | 75.1                      | 65                                  | 100.0       | 90.0        | 100.0                     | 65                                  | 33.3        | 100.0       | 44.7                      | 65                                  | n/a         | n/a         | n/a                       |
| 66                                  | 82.2        | 99.4        | 74.2                      | 66                                  | 100.0       | 90.0        | 100.0                     | 66                                  | 33.3        | 100.0       | 43.6                      | 66                                  | n/a         | n/a         | n/a                       |
| 67                                  | 82.2        | 99.4        | 73.4                      | 67                                  | 100.0       | 90.0        | 100.0                     | 67                                  | 33.3        | 100.0       | 42.5                      | 67                                  | n/a         | n/a         | n/a                       |
| 68                                  | 82.2        | 99.4        | 72.5                      | 68                                  | 100.0       | 90.0        | 100.0                     | 68                                  | 33.3        | 100.0       | 41.4                      | 68                                  | n/a         | n/a         | n/a                       |
| 69                                  | 82.2        | 99.4        | 71.5                      | 69                                  | 100.0       | 90.0        | 100.0                     | 69                                  | 33.3        | 100.0       | 40.3                      | 69                                  | n/a         | n/a         | n/a                       |
| 70                                  | 82.2        | 99.4        | 70.5                      | 70                                  | 100.0       | 90.0        | 100.0                     | 70                                  | 33.3        | 100.0       | 39.1                      | 70                                  | n/a         | n/a         | n/a                       |
| 71                                  | 82.2        | 99.4        | 69.5                      | 71                                  | 100.0       | 90.0        | 100.0                     | 71                                  | 33.3        | 100.0       | 38.0                      | 71                                  | n/a         | n/a         | n/a                       |
| 72                                  | 82.2        | 99.4        | 68.5                      | 72                                  | 100.0       | 90.0        | 100.0                     | 72                                  | 33.3        | 100.0       | 36.8                      | 72                                  | n/a         | n/a         | n/a                       |
| 73                                  | 82.2        | 99.4        | 67.4                      | 73                                  | 100.0       | 90.0        | 100.0                     | 73                                  | 33.3        | 100.0       | 35.7                      | 73                                  | n/a         | n/a         | n/a                       |

</

|     |      |      |      |     |       |      |         |     |      |       |      |     |     |     |     |
|-----|------|------|------|-----|-------|------|---------|-----|------|-------|------|-----|-----|-----|-----|
| 74  | 82.2 | 99.4 | 66.3 | 74  | 100.0 | 90.0 | 100.0   | 74  | 33.3 | 100.0 | 34.5 | 74  | n/a | n/a | n/a |
| 75  | 82.2 | 99.4 | 65.1 | 75  | 100.0 | 90.0 | 100.0   | 75  | 33.3 | 100.0 | 33.3 | 75  | n/a | n/a | n/a |
| 76  | 82.2 | 99.4 | 63.8 | 76  | 100.0 | 90.0 | 100.0   | 76  | 33.3 | 100.0 | 32.1 | 76  | n/a | n/a | n/a |
| 77  | 82.2 | 99.4 | 62.5 | 77  | 100.0 | 90.0 | 100.0   | 77  | 33.3 | 100.0 | 30.9 | 77  | n/a | n/a | n/a |
| 78  | 82.2 | 99.4 | 61.2 | 78  | 100.0 | 90.0 | 100.0   | 78  | 33.3 | 100.0 | 29.7 | 78  | n/a | n/a | n/a |
| 79  | 82.2 | 99.4 | 59.8 | 79  | 100.0 | 90.0 | 100.0   | 79  | 33.3 | 100.0 | 28.5 | 79  | n/a | n/a | n/a |
| 80  | 82.2 | 99.4 | 58.3 | 80  | 100.0 | 90.0 | 100.0   | 80  | 33.3 | 100.0 | 27.3 | 80  | n/a | n/a | n/a |
| 81  | 82.2 | 99.4 | 56.7 | 81  | 100.0 | 90.0 | 100.0   | 81  | 33.3 | 100.0 | 26.0 | 81  | n/a | n/a | n/a |
| 82  | 82.2 | 99.4 | 55.1 | 82  | 100.0 | 90.0 | 100.0   | 82  | 33.3 | 100.0 | 24.8 | 82  | n/a | n/a | n/a |
| 83  | 82.2 | 99.4 | 53.4 | 83  | 100.0 | 90.0 | 100.0   | 83  | 33.3 | 100.0 | 23.5 | 83  | n/a | n/a | n/a |
| 84  | 82.2 | 99.4 | 51.6 | 84  | 100.0 | 90.0 | 100.0   | 84  | 33.3 | 100.0 | 22.2 | 84  | n/a | n/a | n/a |
| 85  | 82.2 | 99.4 | 49.7 | 85  | 100.0 | 90.0 | 100.0   | 85  | 33.3 | 100.0 | 20.9 | 85  | n/a | n/a | n/a |
| 86  | 82.2 | 99.4 | 47.6 | 86  | 100.0 | 90.0 | 100.0   | 86  | 33.3 | 100.0 | 19.6 | 86  | n/a | n/a | n/a |
| 87  | 82.2 | 99.4 | 45.5 | 87  | 100.0 | 90.0 | 100.0   | 87  | 33.3 | 100.0 | 18.3 | 87  | n/a | n/a | n/a |
| 88  | 82.2 | 99.4 | 43.2 | 88  | 100.0 | 90.0 | 100.0   | 88  | 33.3 | 100.0 | 17.0 | 88  | n/a | n/a | n/a |
| 89  | 82.2 | 99.4 | 40.9 | 89  | 100.0 | 90.0 | 100.0   | 89  | 33.3 | 100.0 | 15.6 | 89  | n/a | n/a | n/a |
| 90  | 82.2 | 99.4 | 38.3 | 90  | 100.0 | 90.0 | 100.0   | 90  | 33.3 | 100.0 | 14.3 | 90  | n/a | n/a | n/a |
| 91  | 82.2 | 99.4 | 35.6 | 91  | 100.0 | 90.0 | 100.0   | 91  | 33.3 | 100.0 | 12.9 | 91  | n/a | n/a | n/a |
| 92  | 82.2 | 99.4 | 32.7 | 92  | 100.0 | 90.0 | 100.0   | 92  | 33.3 | 100.0 | 11.5 | 92  | n/a | n/a | n/a |
| 93  | 82.2 | 99.4 | 29.6 | 93  | 100.0 | 90.0 | 100.0   | 93  | 33.3 | 100.0 | 10.1 | 93  | n/a | n/a | n/a |
| 94  | 82.2 | 99.4 | 26.3 | 94  | 100.0 | 90.0 | 100.0   | 94  | 33.3 | 100.0 | 8.7  | 94  | n/a | n/a | n/a |
| 95  | 82.2 | 99.4 | 22.7 | 95  | 100.0 | 90.0 | 100.0   | 95  | 33.3 | 100.0 | 7.3  | 95  | n/a | n/a | n/a |
| 96  | 82.2 | 99.4 | 18.9 | 96  | 100.0 | 90.0 | 100.0   | 96  | 33.3 | 100.0 | 5.9  | 96  | n/a | n/a | n/a |
| 97  | 82.2 | 99.4 | 14.7 | 97  | 100.0 | 90.0 | 100.0   | 97  | 33.3 | 100.0 | 4.4  | 97  | n/a | n/a | n/a |
| 98  | 82.2 | 99.4 | 10.2 | 98  | 100.0 | 90.0 | 100.0   | 98  | 33.3 | 100.0 | 3.0  | 98  | n/a | n/a | n/a |
| 99  | 82.2 | 99.4 | 5.3  | 99  | 100.0 | 90.0 | 100.0   | 99  | 33.3 | 100.0 | 1.5  | 99  | n/a | n/a | n/a |
| 100 | 82.2 | 99.4 | 0.0  | 100 | 100.0 | 90.0 | #DIV/0! | 100 | 33.3 | 100.0 | 0.0  | 100 | n/a | n/a | n/a |

| Prevalence of rifampicin resistance | <u>R-SS</u> |             |                           | Prevalence of rifampicin resistance | <u>R-RS</u> |             |                           | Prevalence of rifampicin resistance | <u>R-SR</u> |             |                           | Prevalence of rifampicin resistance | <u>R-RR</u> |             |                           |
|-------------------------------------|-------------|-------------|---------------------------|-------------------------------------|-------------|-------------|---------------------------|-------------------------------------|-------------|-------------|---------------------------|-------------------------------------|-------------|-------------|---------------------------|
|                                     | Sensitivity | Specificity | Negative Predictive Value |                                     | Sensitivity | Specificity | Negative Predictive Value |                                     | Sensitivity | Specificity | Negative Predictive Value |                                     | Sensitivity | Specificity | Negative Predictive Value |
| 1                                   | 95.9        | 95.9        | 100.0                     | 1                                   | 98.4        | 86.2        | 100.0                     | 1                                   | 98.2        | 74.1        | 100.0                     | 1                                   | 99.7        | 23.1        | 100.0                     |
| 2                                   | 95.9        | 95.9        | 99.9                      | 2                                   | 98.4        | 86.2        | 100.0                     | 2                                   | 98.2        | 74.1        | 100.0                     | 2                                   | 99.7        | 23.1        | 100.0                     |
| 3                                   | 95.9        | 95.9        | 99.9                      | 3                                   | 98.4        | 86.2        | 99.9                      | 3                                   | 98.2        | 74.1        | 99.9                      | 3                                   | 99.7        | 23.1        | 100.0                     |
| 4                                   | 95.9        | 95.9        | 99.8                      | 4                                   | 98.4        | 86.2        | 99.9                      | 4                                   | 98.2        | 74.1        | 99.9                      | 4                                   | 99.7        | 23.1        | 99.9                      |
| 5                                   | 95.9        | 95.9        | 99.8                      | 5                                   | 98.4        | 86.2        | 99.9                      | 5                                   | 98.2        | 74.1        | 99.9                      | 5                                   | 99.7        | 23.1        | 99.9                      |
| 6                                   | 95.9        | 95.9        | 99.7                      | 6                                   | 98.4        | 86.2        | 99.9                      | 6                                   | 98.2        | 74.1        | 99.8                      | 6                                   | 99.7        | 23.1        | 99.9                      |
| 7                                   | 95.9        | 95.9        | 99.7                      | 7                                   | 98.4        | 86.2        | 99.9                      | 7                                   | 98.2        | 74.1        | 99.8                      | 7                                   | 99.7        | 23.1        | 99.9                      |
| 8                                   | 95.9        | 95.9        | 99.6                      | 8                                   | 98.4        | 86.2        | 99.8                      | 8                                   | 98.2        | 74.1        | 99.8                      | 8                                   | 99.7        | 23.1        | 99.9                      |
| 9                                   | 95.9        | 95.9        | 99.6                      | 9                                   | 98.4        | 86.2        | 99.8                      | 9                                   | 98.2        | 74.1        | 99.8                      | 9                                   | 99.7        | 23.1        | 99.9                      |
| 10                                  | 95.9        | 95.9        | 99.5                      | 10                                  | 98.4        | 86.2        | 99.8                      | 10                                  | 98.2        | 74.1        | 99.7                      | 10                                  | 99.7        | 23.1        | 99.9                      |
| 11                                  | 95.9        | 95.9        | 99.5                      | 11                                  | 98.4        | 86.2        | 99.8                      | 11                                  | 98.2        | 74.1        | 99.7                      | 11                                  | 99.7        | 23.1        | 99.8                      |
| 12                                  | 95.9        | 95.9        | 99.4                      | 12                                  | 98.4        | 86.2        | 99.7                      | 12                                  | 98.2        | 74.1        | 99.7                      | 12                                  | 99.7        | 23.1        | 99.8                      |
| 13                                  | 95.9        | 95.9        | 99.4                      | 13                                  | 98.4        | 86.2        | 99.7                      | 13                                  | 98.2        | 74.1        | 99.6                      | 13                                  | 99.7        | 23.1        | 99.8                      |
| 14                                  | 95.9        | 95.9        | 99.3                      | 14                                  | 98.4        | 86.2        | 99.7                      | 14                                  | 98.2        | 74.1        | 99.6                      | 14                                  | 99.7        | 23.1        | 99.8                      |
| 15                                  | 95.9        | 95.9        | 99.2                      | 15                                  | 98.4        | 86.2        | 99.7                      | 15                                  | 98.2        | 74.1        | 99.6                      | 15                                  | 99.7        | 23.1        | 99.8                      |
| 16                                  | 95.9        | 95.9        | 99.2                      | 16                                  | 98.4        | 86.2        | 99.6                      | 16                                  | 98.2        | 74.1        | 99.5                      | 16                                  | 99.7        | 23.1        | 99.8                      |
| 17                                  | 95.9        | 95.9        | 99.1                      | 17                                  | 98.4        | 86.2        | 99.6                      | 17                                  | 98.2        | 74.1        | 99.5                      | 17                                  | 99.7        | 23.1        | 99.7                      |
| 18                                  | 95.9        | 95.9        | 99.1                      | 18                                  | 98.4        | 86.2        | 99.6                      | 18                                  | 98.2        | 74.1        | 99.5                      | 18                                  | 99.7        | 23.1        | 99.7                      |
| 19                                  | 95.9        | 95.9        | 99.0                      | 19                                  | 98.4        | 86.2        | 99.6                      | 19                                  | 98.2        | 74.1        | 99.4                      | 19                                  | 99.7        | 23.1        | 99.7                      |
| 20                                  | 95.9        | 95.9        | 98.9                      | 20                                  | 98.4        | 86.2        | 99.5                      | 20                                  | 98.2        | 74.1        | 99.4                      | 20                                  | 99.7        | 23.1        | 99.7                      |
| 21                                  | 95.9        | 95.9        | 98.9                      | 21                                  | 98.4        | 86.2        | 99.5                      | 21                                  | 98.2        | 74.1        | 99.4                      | 21                                  | 99.7        | 23.1        | 99.7                      |
| 22                                  | 95.9        | 95.9        | 98.8                      | 22                                  | 98.4        | 86.2        | 99.5                      | 22                                  | 98.2        | 74.1        | 99.3                      | 22                                  | 99.7        | 23.1        | 99.6                      |
| 23                                  | 95.9        | 95.9        | 98.7                      | 23                                  | 98.4        | 86.2        | 99.4                      | 23                                  | 98.2        | 74.1        | 99.3                      | 23                                  | 99.7        | 23.1        | 99.6                      |
| 24                                  | 95.9        | 95.9        | 98.7                      | 24                                  | 98.4        | 86.2        | 99.4                      | 24                                  | 98.2        | 74.1        | 99.2                      | 24                                  | 99.7        | 23.1        | 99.6                      |
| 25                                  | 95.9        | 95.9        | 98.6                      | 25                                  | 98.4        | 86.2        | 99.4                      | 25                                  | 98.2        | 74.1        | 99.2                      | 25                                  | 99.7        | 23.1        | 99.6                      |
| 26                                  | 95.9        | 95.9        | 98.5                      | 26                                  | 98.4        | 86.2        | 99.3                      | 26                                  | 98.2        | 74.1        | 99.2                      | 26                                  | 99.7        | 23.1        | 99.5                      |
| 27                                  | 95.9        | 95.9        | 98.4                      | 27                                  | 98.4        | 86.2        | 99.3                      | 27                                  | 98.2        | 74.1        | 99.1                      | 27                                  | 99.7        | 23.1        | 99.5                      |
| 28                                  | 95.9        | 95.9        | 98.4                      | 28                                  | 98.4        | 86.2        | 99.3                      | 28                                  | 98.2        | 74.1        | 99.1                      | 28                                  | 99.7        | 23.1        | 99.5                      |
| 29                                  | 95.9        | 95.9        | 98.3                      | 29                                  | 98.4        | 86.2        | 99.2                      | 29                                  | 98.2        | 74.1        | 99.0                      | 29                                  | 99.7        | 23.1        | 99.5                      |
| 30                                  | 95.9        | 95.9        | 98.2                      | 30                                  | 98.4        | 86.2        | 99.2                      | 30                                  | 98.2        | 74.1        | 99.0                      | 30                                  | 99.7        | 23.1        | 99.4                      |
| 31                                  | 95.9        | 95.9        | 98.1                      | 31                                  | 98.4        | 86.2        | 99.2                      | 31                                  | 98.2        | 74.1        | 98.9                      | 31                                  | 99.7        | 23.1        | 99.4                      |
| 32                                  | 95.9        | 95.9        | 98.0                      | 32                                  | 98.4        | 86.2        | 99.1                      | 32                                  | 98.2        | 74.1        | 98.9                      | 32                                  | 99.7        | 23.1        | 99.4                      |
| 33                                  | 95.9        | 95.9        | 97.9                      | 33                                  | 98.4        | 86.2        | 99.1                      | 33                                  | 98.2        | 74.1        | 98.8                      | 33                                  | 99.7        | 23.1        | 99.4                      |
| 34                                  | 95.9        | 95.9        | 97.8                      | 34                                  | 98.4        | 86.2        | 99.0                      | 34                                  | 98.2        | 74.1        | 98.8                      | 34                                  | 99.7        | 23.1        | 99.3                      |
| 35                                  | 95.9        | 95.9        | 97.7                      | 35                                  | 98.4        | 86.2        | 99.0                      | 35                                  | 98.2        | 74.1        | 98.7                      | 35                                  | 99.7        | 23.1        | 99.3                      |
| 36                                  | 95.9        | 95.9        | 97.6                      | 36                                  | 98.4        | 86.2        | 99.0                      | 36                                  | 98.2        | 74.1        | 98.7                      | 36                                  | 99.7        | 23.1        | 99.3                      |
| 37                                  | 95.9        | 95.9        | 97.5                      | 37                                  | 98.4        | 86.2        | 98.9                      | 37                                  | 98.2        | 74.1        | 98.6                      | 37                                  | 99.7        | 23.1        | 99.2                      |
| 38                                  | 95.9        | 95.9        | 97.4                      | 38                                  | 98.4        | 86.2        | 98.9                      | 38                                  | 98.2        | 74.1        | 98.5                      | 38                                  | 99.7        | 23.1        | 99.2                      |
| 39                                  | 95.9        | 95.9        | 97.3                      | 39                                  | 98.4        | 86.2        | 98.8                      | 39                                  | 98.2        | 74.1        | 98.5                      | 39                                  | 99.7        | 23.1        | 99.2                      |
| 40                                  | 95.9        | 95.9        | 97.2                      | 40                                  | 98.4        | 86.2        | 98.8                      | 40                                  | 98.2        | 74.1        | 98.4                      | 40                                  | 99.7        | 23.1        | 99.1                      |
| 41                                  | 95.9        | 95.9        | 97.1                      | 41                                  | 98.4        | 86.2        | 98.7                      | 41                                  | 98.2        | 74.1        | 98.3                      | 41                                  | 99.7        | 23.1        | 99.1                      |
| 42                                  | 95.9        | 95.9        | 97.0                      | 42                                  | 98.4        | 86.2        | 98.7                      | 42                                  | 98.2        | 74.1        | 98.3                      | 42                                  | 99.7        | 23.1        | 99.1                      |
| 43                                  | 95.9        | 95.9        | 96.9                      | 43                                  | 98.4        | 86.2        | 98.6                      | 43                                  | 98.2        | 74.1        | 98.2                      | 43                                  | 99.7        | 23.1        | 99.0                      |
| 44                                  | 95.9        | 95.9        | 96.7                      | 44                                  | 98.4        | 86.2        | 98.5                      | 44                                  | 98.2        | 74.1        | 98.1                      | 44                                  | 99.7        | 23.1        | 99.0                      |
| 45                                  | 95.9        | 95.9        | 96.6                      | 45                                  | 98.4        | 86.2        | 98.5                      | 45                                  | 98.2        | 74.1        | 98.0                      | 45                                  | 99.7        | 23.1        | 98.9                      |
| 46                                  | 95.9        | 95.9        | 96.5                      | 46                                  | 98.4        | 86.2        | 98.4                      | 46                                  | 98.2        | 74.1        | 98.0                      | 46                                  | 99.7        | 23.1        | 98.9                      |
| 47                                  | 95.9        | 95.9        | 96.3                      | 47                                  | 98.4        | 86.2        | 98.4                      | 47                                  | 98.2        | 74.1        | 97.9                      | 47                                  | 99.7        | 23.1        | 98.9                      |
| 48                                  | 95.9        | 95.9        | 96.2                      | 48                                  | 98.4        | 86.2        | 98.3                      | 48                                  | 98.2        | 74.1        | 97.8                      | 48                                  | 99.7        | 23.1        | 98.8                      |
| 49                                  | 95.9        | 95.9        | 96.0                      | 49                                  | 98.4        | 86.2        | 98.2                      | 49                                  | 98.2        | 74.1        | 97.7                      | 49                                  | 99.7        | 23.1        | 98.8                      |
| 50                                  | 95.9        | 95.9        | 95.9                      | 50                                  | 98.4        | 86.2        | 98.2                      | 50                                  | 98.2        | 74.1        | 97.6                      | 50                                  | 99.7        | 23.1        | 98.7                      |
| 51                                  | 95.9        | 95.9        | 95.7                      | 51                                  | 98.4        | 86.2        | 98.1                      | 51                                  | 98.2        | 74.1        | 97.5                      | 51                                  | 99.7        | 23.1        | 98.7                      |
| 52                                  | 95.9        | 95.9        | 95.5                      | 52                                  | 98.4        | 86.2        | 98.0                      | 52                                  | 98.2        | 74.1        | 97.4                      | 52                                  | 99.7        | 23.1        | 98.6                      |
| 53                                  | 95.9        | 95.9        | 95.4                      | 53                                  | 98.4        | 86.2        | 97.9                      | 53                                  | 98.2        | 74.1        | 97.3                      | 53                                  | 99.7        | 23.1        | 98.6                      |
| 54                                  | 95.9        | 95.9        | 95.2                      | 54                                  | 98.4        | 86.2        | 97.8                      | 54                                  | 98.2        | 74.1        | 97.2                      | 54                                  | 99.7        | 23.1        | 98.5                      |
| 55                                  | 95.9        | 95.9        | 95.0                      | 55                                  | 98.4        | 86.2        | 97.7                      | 55                                  | 98.2        | 74.1        | 97.1                      | 55                                  | 99.7        | 23.1        | 98.4                      |
| 56                                  | 95.9        | 95.9        | 94.8                      | 56                                  | 98.4        | 86.2        | 97.7                      | 56                                  | 98.2        | 74.1        | 97.0                      | 56                                  | 99.7        | 23.1        | 98.4                      |
| 57                                  | 95.9        | 95.9        | 94.6                      | 57                                  | 98.4        | 86.2        | 97.6                      | 57                                  | 98.2        | 74.1        | 96.9                      | 57                                  | 99.7        | 23.1        | 98.3                      |
| 58                                  | 95.9        | 95.9        | 94.4                      | 58                                  | 98.4        | 86.2        | 97.5                      | 58                                  | 98.2        | 74.1        | 96.8                      | 58                                  | 99.7        | 23.1        | 98.2                      |
| 59                                  | 95.9        | 95.9        | 94.2                      | 59                                  | 98.4        | 86.2        | 97.4                      | 59                                  | 98.2        | 74.1        | 96.6                      | 59                                  | 99.7        | 23.1        | 98.2                      |
| 60                                  | 95.9        | 95.9        | 93.9                      | 60                                  | 98.4        | 86.2        | 97.3                      | 60                                  | 98.2        | 74.1        | 96.5                      | 60                                  | 99.7        |             |                           |

|     |      |      |      |     |      |      |      |     |      |      |      |     |      |      |      |
|-----|------|------|------|-----|------|------|------|-----|------|------|------|-----|------|------|------|
| 65  | 95.9 | 95.9 | 92.6 | 65  | 98.4 | 86.2 | 96.6 | 65  | 98.2 | 74.1 | 95.7 | 65  | 99.7 | 23.1 | 97.6 |
| 66  | 95.9 | 95.9 | 92.3 | 66  | 98.4 | 86.2 | 96.5 | 66  | 98.2 | 74.1 | 95.5 | 66  | 99.7 | 23.1 | 97.5 |
| 67  | 95.9 | 95.9 | 92.0 | 67  | 98.4 | 86.2 | 96.3 | 67  | 98.2 | 74.1 | 95.3 | 67  | 99.7 | 23.1 | 97.4 |
| 68  | 95.9 | 95.9 | 91.6 | 68  | 98.4 | 86.2 | 96.2 | 68  | 98.2 | 74.1 | 95.1 | 68  | 99.7 | 23.1 | 97.3 |
| 69  | 95.9 | 95.9 | 91.3 | 69  | 98.4 | 86.2 | 96.0 | 69  | 98.2 | 74.1 | 94.9 | 69  | 99.7 | 23.1 | 97.2 |
| 70  | 95.9 | 95.9 | 90.9 | 70  | 98.4 | 86.2 | 95.8 | 70  | 98.2 | 74.1 | 94.6 | 70  | 99.7 | 23.1 | 97.1 |
| 71  | 95.9 | 95.9 | 90.5 | 71  | 98.4 | 86.2 | 95.6 | 71  | 98.2 | 74.1 | 94.4 | 71  | 99.7 | 23.1 | 96.9 |
| 72  | 95.9 | 95.9 | 90.0 | 72  | 98.4 | 86.2 | 95.4 | 72  | 98.2 | 74.1 | 94.1 | 72  | 99.7 | 23.1 | 96.8 |
| 73  | 95.9 | 95.9 | 89.6 | 73  | 98.4 | 86.2 | 95.2 | 73  | 98.2 | 74.1 | 93.8 | 73  | 99.7 | 23.1 | 96.6 |
| 74  | 95.9 | 95.9 | 89.1 | 74  | 98.4 | 86.2 | 94.9 | 74  | 98.2 | 74.1 | 93.5 | 74  | 99.7 | 23.1 | 96.4 |
| 75  | 95.9 | 95.9 | 88.6 | 75  | 98.4 | 86.2 | 94.7 | 75  | 98.2 | 74.1 | 93.2 | 75  | 99.7 | 23.1 | 96.2 |
| 76  | 95.9 | 95.9 | 88.0 | 76  | 98.4 | 86.2 | 94.4 | 76  | 98.2 | 74.1 | 92.8 | 76  | 99.7 | 23.1 | 96.0 |
| 77  | 95.9 | 95.9 | 87.4 | 77  | 98.4 | 86.2 | 94.1 | 77  | 98.2 | 74.1 | 92.5 | 77  | 99.7 | 23.1 | 95.8 |
| 78  | 95.9 | 95.9 | 86.8 | 78  | 98.4 | 86.2 | 93.7 | 78  | 98.2 | 74.1 | 92.1 | 78  | 99.7 | 23.1 | 95.6 |
| 79  | 95.9 | 95.9 | 86.1 | 79  | 98.4 | 86.2 | 93.4 | 79  | 98.2 | 74.1 | 91.6 | 79  | 99.7 | 23.1 | 95.3 |
| 80  | 95.9 | 95.9 | 85.3 | 80  | 98.4 | 86.2 | 93.0 | 80  | 98.2 | 74.1 | 91.1 | 80  | 99.7 | 23.1 | 95.1 |
| 81  | 95.9 | 95.9 | 84.5 | 81  | 98.4 | 86.2 | 92.6 | 81  | 98.2 | 74.1 | 90.6 | 81  | 99.7 | 23.1 | 94.8 |
| 82  | 95.9 | 95.9 | 83.6 | 82  | 98.4 | 86.2 | 92.1 | 82  | 98.2 | 74.1 | 90.0 | 82  | 99.7 | 23.1 | 94.4 |
| 83  | 95.9 | 95.9 | 82.6 | 83  | 98.4 | 86.2 | 91.6 | 83  | 98.2 | 74.1 | 89.4 | 83  | 99.7 | 23.1 | 94.0 |
| 84  | 95.9 | 95.9 | 81.6 | 84  | 98.4 | 86.2 | 91.0 | 84  | 98.2 | 74.1 | 88.7 | 84  | 99.7 | 23.1 | 93.6 |
| 85  | 95.9 | 95.9 | 80.4 | 85  | 98.4 | 86.2 | 90.4 | 85  | 98.2 | 74.1 | 87.9 | 85  | 99.7 | 23.1 | 93.1 |
| 86  | 95.9 | 95.9 | 79.1 | 86  | 98.4 | 86.2 | 89.6 | 86  | 98.2 | 74.1 | 87.0 | 86  | 99.7 | 23.1 | 92.6 |
| 87  | 95.9 | 95.9 | 77.6 | 87  | 98.4 | 86.2 | 88.8 | 87  | 98.2 | 74.1 | 86.0 | 87  | 99.7 | 23.1 | 92.0 |
| 88  | 95.9 | 95.9 | 76.0 | 88  | 98.4 | 86.2 | 87.9 | 88  | 98.2 | 74.1 | 84.9 | 88  | 99.7 | 23.1 | 91.3 |
| 89  | 95.9 | 95.9 | 74.2 | 89  | 98.4 | 86.2 | 86.8 | 89  | 98.2 | 74.1 | 83.6 | 89  | 99.7 | 23.1 | 90.5 |
| 90  | 95.9 | 95.9 | 72.1 | 90  | 98.4 | 86.2 | 85.5 | 90  | 98.2 | 74.1 | 82.0 | 90  | 99.7 | 23.1 | 89.5 |
| 91  | 95.9 | 95.9 | 69.7 | 91  | 98.4 | 86.2 | 84.0 | 91  | 98.2 | 74.1 | 80.3 | 91  | 99.7 | 23.1 | 88.4 |
| 92  | 95.9 | 95.9 | 66.9 | 92  | 98.4 | 86.2 | 82.2 | 92  | 98.2 | 74.1 | 78.1 | 92  | 99.7 | 23.1 | 87.0 |
| 93  | 95.9 | 95.9 | 63.6 | 93  | 98.4 | 86.2 | 80.0 | 93  | 98.2 | 74.1 | 75.6 | 93  | 99.7 | 23.1 | 85.3 |
| 94  | 95.9 | 95.9 | 59.7 | 94  | 98.4 | 86.2 | 77.2 | 94  | 98.2 | 74.1 | 72.4 | 94  | 99.7 | 23.1 | 83.1 |
| 95  | 95.9 | 95.9 | 55.0 | 95  | 98.4 | 86.2 | 73.6 | 95  | 98.2 | 74.1 | 68.4 | 95  | 99.7 | 23.1 | 80.2 |
| 96  | 95.9 | 95.9 | 49.2 | 96  | 98.4 | 86.2 | 68.9 | 96  | 98.2 | 74.1 | 63.1 | 96  | 99.7 | 23.1 | 76.2 |
| 97  | 95.9 | 95.9 | 41.8 | 97  | 98.4 | 86.2 | 62.1 | 97  | 98.2 | 74.1 | 56.0 | 97  | 99.7 | 23.1 | 70.4 |
| 98  | 95.9 | 95.9 | 32.1 | 98  | 98.4 | 86.2 | 52.0 | 98  | 98.2 | 74.1 | 45.6 | 98  | 99.7 | 23.1 | 61.1 |
| 99  | 95.9 | 95.9 | 19.0 | 99  | 98.4 | 86.2 | 34.9 | 99  | 98.2 | 74.1 | 29.3 | 99  | 99.7 | 23.1 | 43.7 |
| 100 | 95.9 | 95.9 | 0.0  | 100 | 98.4 | 86.2 | 0.0  | 100 | 98.2 | 74.1 | 0.0  | 100 | 99.7 | 23.1 | 0.0  |

| <u>SS-S</u>                         |             |             |                           | <u>RS-S</u>                         |             |             |                           | <u>SR-S</u>                         |             |             |                           | <u>RR-S</u>                         |             |             |                           |
|-------------------------------------|-------------|-------------|---------------------------|-------------------------------------|-------------|-------------|---------------------------|-------------------------------------|-------------|-------------|---------------------------|-------------------------------------|-------------|-------------|---------------------------|
| Prevalence of ethambutol resistance | Sensitivity | Specificity | Negative Predictive Value | Prevalence of ethambutol resistance | Sensitivity | Specificity | Negative Predictive Value | Prevalence of ethambutol resistance | Sensitivity | Specificity | Negative Predictive Value | Prevalence of ethambutol resistance | Sensitivity | Specificity | Negative Predictive Value |
| 1                                   | 10.0        | 99.9        | 99.1                      | 1                                   | 80.8        | 92.4        | 99.8                      | 1                                   | 66.7        | 98.9        | 99.7                      | 1                                   | 94.9        | 54.3        | 99.9                      |
| 2                                   | 10.0        | 99.9        | 98.2                      | 2                                   | 80.8        | 92.4        | 99.6                      | 2                                   | 66.7        | 98.9        | 99.3                      | 2                                   | 94.9        | 54.3        | 99.8                      |
| 3                                   | 10.0        | 99.9        | 97.3                      | 3                                   | 80.8        | 92.4        | 99.4                      | 3                                   | 66.7        | 98.9        | 99.0                      | 3                                   | 94.9        | 54.3        | 99.7                      |
| 4                                   | 10.0        | 99.9        | 96.4                      | 4                                   | 80.8        | 92.4        | 99.1                      | 4                                   | 66.7        | 98.9        | 98.6                      | 4                                   | 94.9        | 54.3        | 99.6                      |
| 5                                   | 10.0        | 99.9        | 95.5                      | 5                                   | 80.8        | 92.4        | 98.9                      | 5                                   | 66.7        | 98.9        | 98.3                      | 5                                   | 94.9        | 54.3        | 99.5                      |
| 6                                   | 10.0        | 99.9        | 94.6                      | 6                                   | 80.8        | 92.4        | 98.7                      | 6                                   | 66.7        | 98.9        | 97.9                      | 6                                   | 94.9        | 54.3        | 99.4                      |
| 7                                   | 10.0        | 99.9        | 93.7                      | 7                                   | 80.8        | 92.4        | 98.5                      | 7                                   | 66.7        | 98.9        | 97.5                      | 7                                   | 94.9        | 54.3        | 99.3                      |
| 8                                   | 10.0        | 99.9        | 92.7                      | 8                                   | 80.8        | 92.4        | 98.2                      | 8                                   | 66.7        | 98.9        | 97.2                      | 8                                   | 94.9        | 54.3        | 99.2                      |
| 9                                   | 10.0        | 99.9        | 91.8                      | 9                                   | 80.8        | 92.4        | 98.0                      | 9                                   | 66.7        | 98.9        | 96.8                      | 9                                   | 94.9        | 54.3        | 99.1                      |
| 10                                  | 10.0        | 99.9        | 90.9                      | 10                                  | 80.8        | 92.4        | 97.7                      | 10                                  | 66.7        | 98.9        | 96.4                      | 10                                  | 94.9        | 54.3        | 99.0                      |
| 11                                  | 10.0        | 99.9        | 90.0                      | 11                                  | 80.8        | 92.4        | 97.5                      | 11                                  | 66.7        | 98.9        | 96.0                      | 11                                  | 94.9        | 54.3        | 98.9                      |
| 12                                  | 10.0        | 99.9        | 89.1                      | 12                                  | 80.8        | 92.4        | 97.2                      | 12                                  | 66.7        | 98.9        | 95.6                      | 12                                  | 94.9        | 54.3        | 98.7                      |
| 13                                  | 10.0        | 99.9        | 88.1                      | 13                                  | 80.8        | 92.4        | 97.0                      | 13                                  | 66.7        | 98.9        | 95.2                      | 13                                  | 94.9        | 54.3        | 98.6                      |
| 14                                  | 10.0        | 99.9        | 87.2                      | 14                                  | 80.8        | 92.4        | 96.7                      | 14                                  | 66.7        | 98.9        | 94.8                      | 14                                  | 94.9        | 54.3        | 98.5                      |
| 15                                  | 10.0        | 99.9        | 86.3                      | 15                                  | 80.8        | 92.4        | 96.5                      | 15                                  | 66.7        | 98.9        | 94.4                      | 15                                  | 94.9        | 54.3        | 98.4                      |
| 16                                  | 10.0        | 99.9        | 85.4                      | 16                                  | 80.8        | 92.4        | 96.2                      | 16                                  | 66.7        | 98.9        | 94.0                      | 16                                  | 94.9        | 54.3        | 98.3                      |
| 17                                  | 10.0        | 99.9        | 84.4                      | 17                                  | 80.8        | 92.4        | 95.9                      | 17                                  | 66.7        | 98.9        | 93.5                      | 17                                  | 94.9        | 54.3        | 98.1                      |
| 18                                  | 10.0        | 99.9        | 83.5                      | 18                                  | 80.8        | 92.4        | 95.6                      | 18                                  | 66.7        | 98.9        | 93.1                      | 18                                  | 94.9        | 54.3        | 98.0                      |
| 19                                  | 10.0        | 99.9        | 82.6                      | 19                                  | 80.8        | 92.4        | 95.3                      | 19                                  | 66.7        | 98.9        | 92.7                      | 19                                  | 94.9        | 54.3        | 97.9                      |
| 20                                  | 10.0        | 99.9        | 81.6                      | 20                                  | 80.8        | 92.4        | 95.1                      | 20                                  | 66.7        | 98.9        | 92.2                      | 20                                  | 94.9        | 54.3        | 97.7                      |
| 21                                  | 10.0        | 99.9        | 80.7                      | 21                                  | 80.8        | 92.4        | 94.8                      | 21                                  | 66.7        | 98.9        | 91.8                      | 21                                  | 94.9        | 54.3        | 97.6                      |
| 22                                  | 10.0        | 99.9        | 79.7                      | 22                                  | 80.8        | 92.4        | 94.5                      | 22                                  | 66.7        | 98.9        | 91.3                      | 22                                  | 94.9        | 54.3        | 97.4                      |
| 23                                  | 10.0        | 99.9        | 78.8                      | 23                                  | 80.8        | 92.4        | 94.1                      | 23                                  | 66.7        | 98.9        | 90.9                      | 23                                  | 94.9        | 54.3        | 97.3                      |
| 24                                  | 10.0        | 99.9        | 77.9                      | 24                                  | 80.8        | 92.4        | 93.8                      | 24                                  | 66.7        | 98.9        | 90.4                      | 24                                  | 94.9        | 54.3        | 97.1                      |
| 25                                  | 10.0        | 99.9        | 76.9                      | 25                                  | 80.8        | 92.4        | 93.5                      | 25                                  | 66.7        | 98.9        | 89.9                      | 25                                  | 94.9        | 54.3        | 97.0                      |
| 26                                  | 10.0        | 99.9        | 76.0                      | 26                                  | 80.8        | 92.4        | 93.2                      | 26                                  | 66.7        | 98.9        | 89.4                      | 26                                  | 94.9        | 54.3        | 96.8                      |
| 27                                  | 10.0        | 99.9        | 75.0                      | 27                                  | 80.8        | 92.4        | 92.9                      | 27                                  | 66.7        | 98.9        | 88.9                      | 27                                  | 94.9        | 54.3        | 96.7                      |
| 28                                  | 10.0        | 99.9        | 74.1                      | 28                                  | 80.8        | 92.4        | 92.5                      | 28                                  | 66.7        | 98.9        | 88.4                      | 28                                  | 94.9        | 54.3        | 96.5                      |
| 29                                  | 10.0        | 99.9        | 73.1                      | 29                                  | 80.8        | 92.4        | 92.2                      | 29                                  | 66.7        | 98.9        | 87.9                      | 29                                  | 94.9        | 54.3        | 96.3                      |
| 30                                  | 10.0        | 99.9        | 72.1                      | 30                                  | 80.8        | 92.4        | 91.8                      | 30                                  | 66.7        | 98.9        | 87.4                      | 30                                  | 94.9        | 54.3        | 96.2                      |
| 31                                  | 10.0        | 99.9        | 71.2                      | 31                                  | 80.8        | 92.4        | 91.4                      | 31                                  | 66.7        | 98.9        | 86.9                      | 31                                  | 94.9        | 54.3        | 96.0                      |
| 32                                  | 10.0        | 99.9        | 70.2                      | 32                                  | 80.8        | 92.4        | 91.1                      | 32                                  | 66.7        | 98.9        | 86.3                      | 32                                  | 94.9        | 54.3        | 95.8                      |
| 33                                  | 10.0        | 99.9        | 69.3                      | 33                                  | 80.8        | 92.4        | 90.7                      | 33                                  | 66.7        | 98.9        | 85.8                      | 33                                  | 94.9        | 54.3        | 95.6                      |
| 34                                  | 10.0        | 99.9        | 68.3                      | 34                                  | 80.8        | 92.4        | 90.3                      | 34                                  | 66.7        | 98.9        | 85.2                      | 34                                  | 94.9        | 54.3        | 95.4                      |
| 35                                  | 10.0        | 99.9        | 67.3                      | 35                                  | 80.8        | 92.4        | 89.9                      | 35                                  | 66.7        | 98.9        | 84.6                      | 35                                  | 94.9        | 54.3        | 95.2                      |
| 36                                  | 10.0        | 99.9        | 66.4                      | 36                                  | 80.8        | 92.4        | 89.5                      | 36                                  | 66.7        | 98.9        | 84.1                      | 36                                  | 94.9        | 54.3        | 95.0                      |
| 37                                  | 10.0        | 99.9        | 65.4                      | 37                                  | 80.8        | 92.4        | 89.1                      | 37                                  | 66.7        | 98.9        | 83.5                      | 37                                  | 94.9        | 54.3        | 94.8                      |
| 38                                  | 10.0        | 99.9        | 64.4                      | 38                                  | 80.8        | 92.4        | 88.7                      | 38                                  | 66.7        | 98.9        | 82.9                      | 38                                  | 94.9        | 54.3        | 94.6                      |
| 39                                  | 10.0        | 99.9        | 63.5                      | 39                                  | 80.8        | 92.4        | 88.3                      | 39                                  | 66.7        | 98.9        | 82.3                      | 39                                  | 94.9        | 54.3        | 94.4                      |
| 40                                  | 10.0        | 99.9        | 62.5                      | 40                                  | 80.8        | 92.4        | 87.8                      | 40                                  | 66.7        | 98.9        | 81.7                      | 40                                  | 94.9        | 54.3        | 94.1                      |
| 41                                  | 10.0        | 99.9        | 61.5                      | 41                                  | 80.8        | 92.4        | 87.4                      | 41                                  | 66.7        | 98.9        | 81.0                      | 41                                  | 94.9        | 54.3        | 93.9                      |
| 42                                  | 10.0        | 99.9        | 60.5                      | 42                                  | 80.8        | 92.4        | 86.9                      | 42                                  | 66.7        | 98.9        | 80.4                      | 42                                  | 94.9        | 54.3        | 93.7                      |
| 43                                  | 10.0        | 99.9        | 59.5                      | 43                                  | 80.8        | 92.4        | 86.4                      | 43                                  | 66.7        | 98.9        | 79.7                      | 43                                  | 94.9        | 54.3        | 93.4                      |
| 44                                  | 10.0        | 99.9        | 58.6                      | 44                                  | 80.8        | 92.4        | 85.9                      | 44                                  | 66.7        | 98.9        | 79.1                      | 44                                  | 94.9        | 54.3        | 93.2                      |
| 45                                  | 10.0        | 99.9        | 57.6                      | 45                                  | 80.8        | 92.4        | 85.4                      | 45                                  | 66.7        | 98.9        | 78.4                      | 45                                  | 94.9        | 54.3        | 92.9                      |
| 46                                  | 10.0        | 99.9        | 56.6                      | 46                                  | 80.8        | 92.4        | 84.9                      | 46                                  | 66.7        | 98.9        | 77.7                      | 46                                  | 94.9        | 54.3        | 92.6                      |
| 47                                  | 10.0        | 99.9        | 55.6                      | 47                                  | 80.8        | 92.4        | 84.4                      | 47                                  | 66.7        | 98.9        | 77.0                      | 47                                  | 94.9        | 54.3        | 92.4                      |
| 48                                  | 10.0        | 99.9        | 54.6                      | 48                                  | 80.8        | 92.4        | 83.9                      | 48                                  | 66.7        | 98.9        | 76.3                      | 48                                  | 94.9        | 54.3        | 92.1                      |
| 49                                  | 10.0        | 99.9        | 53.6                      | 49                                  | 80.8        | 92.4        | 83.3                      | 49                                  | 66.7        | 98.9        | 75.5                      | 49                                  | 94.9        | 54.3        | 91.8                      |
| 50                                  | 10.0        | 99.9        | 52.6                      | 50                                  | 80.8        | 92.4        | 82.8                      | 50                                  | 66.7        | 98.9        | 74.8                      | 50                                  |             |             |                           |



|     |      |      |      |     |      |      |      |     |      |      |      |     |      |      |      |
|-----|------|------|------|-----|------|------|------|-----|------|------|------|-----|------|------|------|
| 56  | 10.0 | 99.9 | 46.6 | 56  | 80.8 | 92.4 | 79.1 | 56  | 66.7 | 98.9 | 70.0 | 56  | 94.9 | 54.3 | 89.4 |
| 57  | 10.0 | 99.9 | 45.6 | 57  | 80.8 | 92.4 | 78.4 | 57  | 66.7 | 98.9 | 69.1 | 57  | 94.9 | 54.3 | 89.0 |
| 58  | 10.0 | 99.9 | 44.6 | 58  | 80.8 | 92.4 | 77.7 | 58  | 66.7 | 98.9 | 68.2 | 58  | 94.9 | 54.3 | 88.6 |
| 59  | 10.0 | 99.9 | 43.5 | 59  | 80.8 | 92.4 | 76.9 | 59  | 66.7 | 98.9 | 67.3 | 59  | 94.9 | 54.3 | 88.2 |
| 60  | 10.0 | 99.9 | 42.5 | 60  | 80.8 | 92.4 | 76.2 | 60  | 66.7 | 98.9 | 66.4 | 60  | 94.9 | 54.3 | 87.7 |
| 61  | 10.0 | 99.9 | 41.5 | 61  | 80.8 | 92.4 | 75.4 | 61  | 66.7 | 98.9 | 65.5 | 61  | 94.9 | 54.3 | 87.3 |
| 62  | 10.0 | 99.9 | 40.5 | 62  | 80.8 | 92.4 | 74.6 | 62  | 66.7 | 98.9 | 64.5 | 62  | 94.9 | 54.3 | 86.8 |
| 63  | 10.0 | 99.9 | 39.5 | 63  | 80.8 | 92.4 | 73.8 | 63  | 66.7 | 98.9 | 63.5 | 63  | 94.9 | 54.3 | 86.3 |
| 64  | 10.0 | 99.9 | 38.4 | 64  | 80.8 | 92.4 | 73.0 | 64  | 66.7 | 98.9 | 62.5 | 64  | 94.9 | 54.3 | 85.8 |
| 65  | 10.0 | 99.9 | 37.4 | 65  | 80.8 | 92.4 | 72.1 | 65  | 66.7 | 98.9 | 61.5 | 65  | 94.9 | 54.3 | 85.2 |
| 66  | 10.0 | 99.9 | 36.4 | 66  | 80.8 | 92.4 | 71.2 | 66  | 66.7 | 98.9 | 60.5 | 66  | 94.9 | 54.3 | 84.7 |
| 67  | 10.0 | 99.9 | 35.3 | 67  | 80.8 | 92.4 | 70.3 | 67  | 66.7 | 98.9 | 59.4 | 67  | 94.9 | 54.3 | 84.1 |
| 68  | 10.0 | 99.9 | 34.3 | 68  | 80.8 | 92.4 | 69.3 | 68  | 66.7 | 98.9 | 58.3 | 68  | 94.9 | 54.3 | 83.5 |
| 69  | 10.0 | 99.9 | 33.3 | 69  | 80.8 | 92.4 | 68.3 | 69  | 66.7 | 98.9 | 57.1 | 69  | 94.9 | 54.3 | 82.8 |
| 70  | 10.0 | 99.9 | 32.2 | 70  | 80.8 | 92.4 | 67.3 | 70  | 66.7 | 98.9 | 56.0 | 70  | 94.9 | 54.3 | 82.1 |
| 71  | 10.0 | 99.9 | 31.2 | 71  | 80.8 | 92.4 | 66.2 | 71  | 66.7 | 98.9 | 54.8 | 71  | 94.9 | 54.3 | 81.4 |
| 72  | 10.0 | 99.9 | 30.2 | 72  | 80.8 | 92.4 | 65.1 | 72  | 66.7 | 98.9 | 53.6 | 72  | 94.9 | 54.3 | 80.7 |
| 73  | 10.0 | 99.9 | 29.1 | 73  | 80.8 | 92.4 | 64.0 | 73  | 66.7 | 98.9 | 52.3 | 73  | 94.9 | 54.3 | 79.9 |
| 74  | 10.0 | 99.9 | 28.1 | 74  | 80.8 | 92.4 | 62.8 | 74  | 66.7 | 98.9 | 51.0 | 74  | 94.9 | 54.3 | 79.0 |
| 75  | 10.0 | 99.9 | 27.0 | 75  | 80.8 | 92.4 | 61.6 | 75  | 66.7 | 98.9 | 49.7 | 75  | 94.9 | 54.3 | 78.1 |
| 76  | 10.0 | 99.9 | 26.0 | 76  | 80.8 | 92.4 | 60.3 | 76  | 66.7 | 98.9 | 48.4 | 76  | 94.9 | 54.3 | 77.2 |
| 77  | 10.0 | 99.9 | 24.9 | 77  | 80.8 | 92.4 | 58.9 | 77  | 66.7 | 98.9 | 47.0 | 77  | 94.9 | 54.3 | 76.2 |
| 78  | 10.0 | 99.9 | 23.8 | 78  | 80.8 | 92.4 | 57.5 | 78  | 66.7 | 98.9 | 45.6 | 78  | 94.9 | 54.3 | 75.1 |
| 79  | 10.0 | 99.9 | 22.8 | 79  | 80.8 | 92.4 | 56.1 | 79  | 66.7 | 98.9 | 44.1 | 79  | 94.9 | 54.3 | 74.0 |
| 80  | 10.0 | 99.9 | 21.7 | 80  | 80.8 | 92.4 | 54.6 | 80  | 66.7 | 98.9 | 42.6 | 80  | 94.9 | 54.3 | 72.8 |
| 81  | 10.0 | 99.9 | 20.7 | 81  | 80.8 | 92.4 | 53.0 | 81  | 66.7 | 98.9 | 41.0 | 81  | 94.9 | 54.3 | 71.5 |
| 82  | 10.0 | 99.9 | 19.6 | 82  | 80.8 | 92.4 | 51.3 | 82  | 66.7 | 98.9 | 39.5 | 82  | 94.9 | 54.3 | 70.2 |
| 83  | 10.0 | 99.9 | 18.5 | 83  | 80.8 | 92.4 | 49.6 | 83  | 66.7 | 98.9 | 37.8 | 83  | 94.9 | 54.3 | 68.7 |
| 84  | 10.0 | 99.9 | 17.5 | 84  | 80.8 | 92.4 | 47.8 | 84  | 66.7 | 98.9 | 36.1 | 84  | 94.9 | 54.3 | 67.1 |
| 85  | 10.0 | 99.9 | 16.4 | 85  | 80.8 | 92.4 | 45.9 | 85  | 66.7 | 98.9 | 34.4 | 85  | 94.9 | 54.3 | 65.4 |
| 86  | 10.0 | 99.9 | 15.3 | 86  | 80.8 | 92.4 | 43.9 | 86  | 66.7 | 98.9 | 32.6 | 86  | 94.9 | 54.3 | 63.6 |
| 87  | 10.0 | 99.9 | 14.2 | 87  | 80.8 | 92.4 | 41.8 | 87  | 66.7 | 98.9 | 30.7 | 87  | 94.9 | 54.3 | 61.6 |
| 88  | 10.0 | 99.9 | 13.1 | 88  | 80.8 | 92.4 | 39.6 | 88  | 66.7 | 98.9 | 28.8 | 88  | 94.9 | 54.3 | 59.4 |
| 89  | 10.0 | 99.9 | 12.1 | 89  | 80.8 | 92.4 | 37.3 | 89  | 66.7 | 98.9 | 26.8 | 89  | 94.9 | 54.3 | 57.0 |
| 90  | 10.0 | 99.9 | 11.0 | 90  | 80.8 | 92.4 | 34.8 | 90  | 66.7 | 98.9 | 24.8 | 90  | 94.9 | 54.3 | 54.4 |
| 91  | 10.0 | 99.9 | 9.9  | 91  | 80.8 | 92.4 | 32.2 | 91  | 66.7 | 98.9 | 22.7 | 91  | 94.9 | 54.3 | 51.5 |
| 92  | 10.0 | 99.9 | 8.8  | 92  | 80.8 | 92.4 | 29.5 | 92  | 66.7 | 98.9 | 20.5 | 92  | 94.9 | 54.3 | 48.2 |
| 93  | 10.0 | 99.9 | 7.7  | 93  | 80.8 | 92.4 | 26.6 | 93  | 66.7 | 98.9 | 18.3 | 93  | 94.9 | 54.3 | 44.7 |
| 94  | 10.0 | 99.9 | 6.6  | 94  | 80.8 | 92.4 | 23.5 | 94  | 66.7 | 98.9 | 15.9 | 94  | 94.9 | 54.3 | 40.6 |
| 95  | 10.0 | 99.9 | 5.5  | 95  | 80.8 | 92.4 | 20.2 | 95  | 66.7 | 98.9 | 13.5 | 95  | 94.9 | 54.3 | 36.1 |
| 96  | 10.0 | 99.9 | 4.4  | 96  | 80.8 | 92.4 | 16.7 | 96  | 66.7 | 98.9 | 11.0 | 96  | 94.9 | 54.3 | 30.9 |
| 97  | 10.0 | 99.9 | 3.3  | 97  | 80.8 | 92.4 | 12.9 | 97  | 66.7 | 98.9 | 8.4  | 97  | 94.9 | 54.3 | 24.9 |
| 98  | 10.0 | 99.9 | 2.2  | 98  | 80.8 | 92.4 | 8.9  | 98  | 66.7 | 98.9 | 5.7  | 98  | 94.9 | 54.3 | 18.0 |
| 99  | 10.0 | 99.9 | 1.1  | 99  | 80.8 | 92.4 | 4.6  | 99  | 66.7 | 98.9 | 2.9  | 99  | 94.9 | 54.3 | 9.8  |
| 100 | 10.0 | 99.9 | 0.0  | 100 | 80.8 | 92.4 | 0.0  | 100 | 66.7 | 98.9 | 0.0  | 100 | 94.9 | 54.3 | 0.0  |

| <u>SS-R</u>                         |             |             |                           | <u>RS-R</u>                         |             |             |                           | <u>SR-R</u>                         |             |             |                           | <u>RR-R</u>                         |             |             |                           |
|-------------------------------------|-------------|-------------|---------------------------|-------------------------------------|-------------|-------------|---------------------------|-------------------------------------|-------------|-------------|---------------------------|-------------------------------------|-------------|-------------|---------------------------|
| Prevalence of ethambutol resistance | Sensitivity | Specificity | Negative Predictive Value | Prevalence of ethambutol resistance | Sensitivity | Specificity | Negative Predictive Value | Prevalence of ethambutol resistance | Sensitivity | Specificity | Negative Predictive Value | Prevalence of ethambutol resistance | Sensitivity | Specificity | Negative Predictive Value |
| 1                                   | n/a         | 98.8        | n/a                       | 1                                   | 85.7        | 74.1        | 99.8                      | 1                                   | n/a         | 100.0       | n/a                       | 1                                   | 98.6        | 25.0        | 99.9                      |
| 2                                   | n/a         | 98.8        | n/a                       | 2                                   | 85.7        | 74.1        | 99.6                      | 2                                   | n/a         | 100.0       | n/a                       | 2                                   | 98.6        | 25.0        | 99.9                      |
| 3                                   | n/a         | 98.8        | n/a                       | 3                                   | 85.7        | 74.1        | 99.4                      | 3                                   | n/a         | 100.0       | n/a                       | 3                                   | 98.6        | 25.0        | 99.8                      |
| 4                                   | n/a         | 98.8        | n/a                       | 4                                   | 85.7        | 74.1        | 99.2                      | 4                                   | n/a         | 100.0       | n/a                       | 4                                   | 98.6        | 25.0        | 99.8                      |
| 5                                   | n/a         | 98.8        | n/a                       | 5                                   | 85.7        | 74.1        | 99.0                      | 5                                   | n/a         | 100.0       | n/a                       | 5                                   | 98.6        | 25.0        | 99.7                      |
| 6                                   | n/a         | 98.8        | n/a                       | 6                                   | 85.7        | 74.1        | 98.8                      | 6                                   | n/a         | 100.0       | n/a                       | 6                                   | 98.6        | 25.0        | 99.6                      |
| 7                                   | n/a         | 98.8        | n/a                       | 7                                   | 85.7        | 74.1        | 98.6                      | 7                                   | n/a         | 100.0       | n/a                       | 7                                   | 98.6        | 25.0        | 99.6                      |
| 8                                   | n/a         | 98.8        | n/a                       | 8                                   | 85.7        | 74.1        | 98.4                      | 8                                   | n/a         | 100.0       | n/a                       | 8                                   | 98.6        | 25.0        | 99.5                      |
| 9                                   | n/a         | 98.8        | n/a                       | 9                                   | 85.7        | 74.1        | 98.1                      | 9                                   | n/a         | 100.0       | n/a                       | 9                                   | 98.6        | 25.0        | 99.4                      |
| 10                                  | n/a         | 98.8        | n/a                       | 10                                  | 85.7        | 74.1        | 97.9                      | 10                                  | n/a         | 100.0       | n/a                       | 10                                  | 98.6        | 25.0        | 99.4                      |
| 11                                  | n/a         | 98.8        | n/a                       | 11                                  | 85.7        | 74.1        | 97.7                      | 11                                  | n/a         | 100.0       | n/a                       | 11                                  | 98.6        | 25.0        | 99.3                      |
| 12                                  | n/a         | 98.8        | n/a                       | 12                                  | 85.7        | 74.1        | 97.4                      | 12                                  | n/a         | 100.0       | n/a                       | 12                                  | 98.6        | 25.0        | 99.2                      |
| 13                                  | n/a         | 98.8        | n/a                       | 13                                  | 85.7        | 74.1        | 97.2                      | 13                                  | n/a         | 100.0       | n/a                       | 13                                  | 98.6        | 25.0        | 99.2                      |
| 14                                  | n/a         | 98.8        | n/a                       | 14                                  | 85.7        | 74.1        | 97.0                      | 14                                  | n/a         | 100.0       | n/a                       | 14                                  | 98.6        | 25.0        | 99.1                      |
| 15                                  | n/a         | 98.8        | n/a                       | 15                                  | 85.7        | 74.1        | 96.7                      | 15                                  | n/a         | 100.0       | n/a                       | 15                                  | 98.6        | 25.0        | 99.0                      |
| 16                                  | n/a         | 98.8        | n/a                       | 16                                  | 85.7        | 74.1        | 96.5                      | 16                                  | n/a         | 100.0       | n/a                       | 16                                  | 98.6        | 25.0        | 98.9                      |
| 17                                  | n/a         | 98.8        | n/a                       | 17                                  | 85.7        | 74.1        | 96.2                      | 17                                  | n/a         | 100.0       | n/a                       | 17                                  | 98.6        | 25.0        | 98.9                      |
| 18                                  | n/a         | 98.8        | n/a                       | 18                                  | 85.7        | 74.1        | 95.9                      | 18                                  | n/a         | 100.0       | n/a                       | 18                                  | 98.6        | 25.0        | 98.8                      |
| 19                                  | n/a         | 98.8        | n/a                       | 19                                  | 85.7        | 74.1        | 95.7                      | 19                                  | n/a         | 100.0       | n/a                       | 19                                  | 98.6        | 25.0        | 98.7                      |
| 20                                  | n/a         | 98.8        | n/a                       | 20                                  | 85.7        | 74.1        | 95.4                      | 20                                  | n/a         | 100.0       | n/a                       | 20                                  | 98.6        | 25.0        | 98.6                      |
| 21                                  | n/a         | 98.8        | n/a                       | 21                                  | 85.7        | 74.1        | 95.1                      | 21                                  | n/a         | 100.0       | n/a                       | 21                                  | 98.6        | 25.0        | 98.5                      |
| 22                                  | n/a         | 98.8        | n/a                       | 22                                  | 85.7        | 74.1        | 94.8                      | 22                                  | n/a         | 100.0       | n/a                       | 22                                  | 98.6        | 25.0        | 98.4                      |
| 23                                  | n/a         | 98.8        | n/a                       | 23                                  | 85.7        | 74.1        | 94.6                      | 23                                  | n/a         | 100.0       | n/a                       | 23                                  | 98.6        | 25.0        | 98.3                      |
| 24                                  | n/a         | 98.8        | n/a                       | 24                                  | 85.7        | 74.1        | 94.3                      | 24                                  | n/a         | 100.0       | n/a                       | 24                                  | 98.6        | 25.0        | 98.2                      |
| 25                                  | n/a         | 98.8        | n/a                       | 25                                  | 85.7        | 74.1        | 94.0                      | 25                                  | n/a         | 100.0       | n/a                       | 25                                  | 98.6        | 25.0        | 98.1                      |
| 26                                  | n/a         | 98.8        | n/a                       | 26                                  | 85.7        | 74.1        | 93.7                      | 26                                  | n/a         | 100.0       | n/a                       | 26                                  | 98.6        | 25.0        | 98.0                      |
| 27                                  | n/a         | 98.8        | n/a                       | 27                                  | 85.7        | 74.1        | 93.3                      | 27                                  | n/a         | 100.0       | n/a                       | 27                                  | 98.6        | 25.0        | 97.9                      |
| 28                                  | n/a         | 98.8        | n/a                       | 28                                  | 85.7        | 74.1        | 93.0                      | 28                                  | n/a         | 100.0       | n/a                       | 28                                  | 98.6        | 25.0        | 97.8                      |
| 29                                  | n/a         | 98.8        | n/a                       | 29                                  | 85.7        | 74.1        | 92.7                      | 29                                  | n/a         | 100.0       | n/a                       | 29                                  | 98.6        | 25.0        | 97.7                      |
| 30                                  | n/a         | 98.8        | n/a                       | 30                                  | 85.7        | 74.1        | 92.4                      | 30                                  | n/a         | 100.0       | n/a                       | 30                                  | 98.6        | 25.0        | 97.6                      |
| 31                                  | n/a         | 98.8        | n/a                       | 31                                  | 85.7        | 74.1        | 92.0                      | 31                                  | n/a         | 100.0       | n/a                       | 31                                  | 98.6        | 25.0        | 97.5                      |
| 32                                  | n/a         | 98.8        | n/a                       | 32                                  | 85.7        | 74.1        | 91.7                      | 32                                  | n/a         | 100.0       | n/a                       | 32                                  | 98.6        | 25.0        | 97.4                      |
| 33                                  | n/a         | 98.8        | n/a                       | 33                                  | 85.7        | 74.1        | 91.3                      | 33                                  | n/a         | 100.0       | n/a                       | 33                                  | 98.6        | 25.0        | 97.3                      |
| 34                                  | n/a         | 98.8        | n/a                       | 34                                  | 85.7        | 74.1        | 91.0                      | 34                                  | n/a         | 100.0       | n/a                       | 34                                  | 98.6        | 25.0        | 97.2                      |
| 35                                  | n/a         | 98.8        | n/a                       | 35                                  | 85.7        | 74.1        | 90.6                      | 35                                  | n/a         | 100.0       | n/a                       | 35                                  | 98.6        | 25.0        | 97.0                      |
| 36                                  | n/a         | 98.8        | n/a                       | 36                                  | 85.7        | 74.1        | 90.2                      | 36                                  | n/a         | 100.0       | n/a                       | 36                                  | 98.6        | 25.0        | 96.9                      |
| 37                                  | n/a         | 98.8        | n/a                       | 37                                  | 85.7        | 74.1        | 89.8                      | 37                                  | n/a         | 100.0       | n/a                       | 37                                  | 98.6        | 25.0        | 96.8                      |
| 38                                  | n/a         | 98.8        | n/a                       | 38                                  | 85.7        | 74.1        | 89.4                      | 38                                  | n/a         | 100.0       | n/a                       | 38                                  | 98.6        | 25.0        | 96.6                      |
| 39                                  | n/a         | 98.8        | n/a                       | 39                                  | 85.7        | 74.1        | 89.0                      | 39                                  | n/a         | 100.0       | n/a                       | 39                                  | 98.6        | 25.0        | 96.5                      |
| 40                                  | n/a         | 98.8        | n/a                       | 40                                  | 85.7        | 74.1        | 88.6                      | 40                                  | n/a         | 100.0       | n/a                       | 40                                  | 98.6        | 25.0        | 96.4                      |
| 41                                  | n/a         | 98.8        | n/a                       | 41                                  | 85.7        | 74.1        | 88.2                      | 41                                  | n/a         | 100.0       | n/a                       | 41                                  | 98.6        | 25.0        | 96.2                      |
| 42                                  | n/a         | 98.8        | n/a                       | 42                                  | 85.7        | 74.1        | 87.7                      | 42                                  | n/a         | 100.0       | n/a                       | 42                                  | 98.6        | 25.0        | 96.1                      |
| 43                                  | n/a         | 98.8        | n/a                       | 43                                  | 85.7        | 74.1        | 87.3                      | 43                                  | n/a         | 100.0       | n/a                       | 43                                  | 98.6        | 25.0        | 95.9                      |
| 44                                  | n/a         | 98.8        | n/a                       | 44                                  | 85.7        | 74.1        | 86.8                      | 44                                  | n/a         | 100.0       | n/a                       | 44                                  | 98.6        | 25.0        | 95.7                      |
| 45                                  | n/a         | 98.8        | n/a                       | 45                                  | 85.7        |             |                           |                                     |             |             |                           |                                     |             |             |                           |

|     |     |      |     |     |      |      |      |     |     |       |     |     |      |      |      |
|-----|-----|------|-----|-----|------|------|------|-----|-----|-------|-----|-----|------|------|------|
| 47  | n/a | 98.8 | n/a | 47  | 85.7 | 74.1 | 85.4 | 47  | n/a | 100.0 | n/a | 47  | 98.6 | 25.0 | 95.2 |
| 48  | n/a | 98.8 | n/a | 48  | 85.7 | 74.1 | 84.9 | 48  | n/a | 100.0 | n/a | 48  | 98.6 | 25.0 | 95.0 |
| 49  | n/a | 98.8 | n/a | 49  | 85.7 | 74.1 | 84.4 | 49  | n/a | 100.0 | n/a | 49  | 98.6 | 25.0 | 94.8 |
| 50  | n/a | 98.8 | n/a | 50  | 85.7 | 74.1 | 83.8 | 50  | n/a | 100.0 | n/a | 50  | 98.6 | 25.0 | 94.6 |
| 51  | n/a | 98.8 | n/a | 51  | 85.7 | 74.1 | 83.3 | 51  | n/a | 100.0 | n/a | 51  | 98.6 | 25.0 | 94.4 |
| 52  | n/a | 98.8 | n/a | 52  | 85.7 | 74.1 | 82.7 | 52  | n/a | 100.0 | n/a | 52  | 98.6 | 25.0 | 94.2 |
| 53  | n/a | 98.8 | n/a | 53  | 85.7 | 74.1 | 82.1 | 53  | n/a | 100.0 | n/a | 53  | 98.6 | 25.0 | 94.0 |
| 54  | n/a | 98.8 | n/a | 54  | 85.7 | 74.1 | 81.5 | 54  | n/a | 100.0 | n/a | 54  | 98.6 | 25.0 | 93.8 |
| 55  | n/a | 98.8 | n/a | 55  | 85.7 | 74.1 | 80.9 | 55  | n/a | 100.0 | n/a | 55  | 98.6 | 25.0 | 93.5 |
| 56  | n/a | 98.8 | n/a | 56  | 85.7 | 74.1 | 80.3 | 56  | n/a | 100.0 | n/a | 56  | 98.6 | 25.0 | 93.3 |
| 57  | n/a | 98.8 | n/a | 57  | 85.7 | 74.1 | 79.6 | 57  | n/a | 100.0 | n/a | 57  | 98.6 | 25.0 | 93.0 |
| 58  | n/a | 98.8 | n/a | 58  | 85.7 | 74.1 | 79.0 | 58  | n/a | 100.0 | n/a | 58  | 98.6 | 25.0 | 92.7 |
| 59  | n/a | 98.8 | n/a | 59  | 85.7 | 74.1 | 78.3 | 59  | n/a | 100.0 | n/a | 59  | 98.6 | 25.0 | 92.4 |
| 60  | n/a | 98.8 | n/a | 60  | 85.7 | 74.1 | 77.6 | 60  | n/a | 100.0 | n/a | 60  | 98.6 | 25.0 | 92.2 |
| 61  | n/a | 98.8 | n/a | 61  | 85.7 | 74.1 | 76.8 | 61  | n/a | 100.0 | n/a | 61  | 98.6 | 25.0 | 91.8 |
| 62  | n/a | 98.8 | n/a | 62  | 85.7 | 74.1 | 76.1 | 62  | n/a | 100.0 | n/a | 62  | 98.6 | 25.0 | 91.5 |
| 63  | n/a | 98.8 | n/a | 63  | 85.7 | 74.1 | 75.3 | 63  | n/a | 100.0 | n/a | 63  | 98.6 | 25.0 | 91.2 |
| 64  | n/a | 98.8 | n/a | 64  | 85.7 | 74.1 | 74.5 | 64  | n/a | 100.0 | n/a | 64  | 98.6 | 25.0 | 90.8 |
| 65  | n/a | 98.8 | n/a | 65  | 85.7 | 74.1 | 73.6 | 65  | n/a | 100.0 | n/a | 65  | 98.6 | 25.0 | 90.5 |
| 66  | n/a | 98.8 | n/a | 66  | 85.7 | 74.1 | 72.8 | 66  | n/a | 100.0 | n/a | 66  | 98.6 | 25.0 | 90.1 |
| 67  | n/a | 98.8 | n/a | 67  | 85.7 | 74.1 | 71.9 | 67  | n/a | 100.0 | n/a | 67  | 98.6 | 25.0 | 89.7 |
| 68  | n/a | 98.8 | n/a | 68  | 85.7 | 74.1 | 70.9 | 68  | n/a | 100.0 | n/a | 68  | 98.6 | 25.0 | 89.2 |
| 69  | n/a | 98.8 | n/a | 69  | 85.7 | 74.1 | 70.0 | 69  | n/a | 100.0 | n/a | 69  | 98.6 | 25.0 | 88.8 |
| 70  | n/a | 98.8 | n/a | 70  | 85.7 | 74.1 | 69.0 | 70  | n/a | 100.0 | n/a | 70  | 98.6 | 25.0 | 88.3 |
| 71  | n/a | 98.8 | n/a | 71  | 85.7 | 74.1 | 67.9 | 71  | n/a | 100.0 | n/a | 71  | 98.6 | 25.0 | 87.8 |
| 72  | n/a | 98.8 | n/a | 72  | 85.7 | 74.1 | 66.8 | 72  | n/a | 100.0 | n/a | 72  | 98.6 | 25.0 | 87.3 |
| 73  | n/a | 98.8 | n/a | 73  | 85.7 | 74.1 | 65.7 | 73  | n/a | 100.0 | n/a | 73  | 98.6 | 25.0 | 86.7 |
| 74  | n/a | 98.8 | n/a | 74  | 85.7 | 74.1 | 64.6 | 74  | n/a | 100.0 | n/a | 74  | 98.6 | 25.0 | 86.1 |
| 75  | n/a | 98.8 | n/a | 75  | 85.7 | 74.1 | 63.3 | 75  | n/a | 100.0 | n/a | 75  | 98.6 | 25.0 | 85.4 |
| 76  | n/a | 98.8 | n/a | 76  | 85.7 | 74.1 | 62.1 | 76  | n/a | 100.0 | n/a | 76  | 98.6 | 25.0 | 84.8 |
| 77  | n/a | 98.8 | n/a | 77  | 85.7 | 74.1 | 60.8 | 77  | n/a | 100.0 | n/a | 77  | 98.6 | 25.0 | 84.0 |
| 78  | n/a | 98.8 | n/a | 78  | 85.7 | 74.1 | 59.4 | 78  | n/a | 100.0 | n/a | 78  | 98.6 | 25.0 | 83.2 |
| 79  | n/a | 98.8 | n/a | 79  | 85.7 | 74.1 | 58.0 | 79  | n/a | 100.0 | n/a | 79  | 98.6 | 25.0 | 82.4 |
| 80  | n/a | 98.8 | n/a | 80  | 85.7 | 74.1 | 56.5 | 80  | n/a | 100.0 | n/a | 80  | 98.6 | 25.0 | 81.5 |
| 81  | n/a | 98.8 | n/a | 81  | 85.7 | 74.1 | 54.9 | 81  | n/a | 100.0 | n/a | 81  | 98.6 | 25.0 | 80.5 |
| 82  | n/a | 98.8 | n/a | 82  | 85.7 | 74.1 | 53.2 | 82  | n/a | 100.0 | n/a | 82  | 98.6 | 25.0 | 79.4 |
| 83  | n/a | 98.8 | n/a | 83  | 85.7 | 74.1 | 51.5 | 83  | n/a | 100.0 | n/a | 83  | 98.6 | 25.0 | 78.3 |
| 84  | n/a | 98.8 | n/a | 84  | 85.7 | 74.1 | 49.7 | 84  | n/a | 100.0 | n/a | 84  | 98.6 | 25.0 | 77.0 |
| 85  | n/a | 98.8 | n/a | 85  | 85.7 | 74.1 | 47.8 | 85  | n/a | 100.0 | n/a | 85  | 98.6 | 25.0 | 75.7 |
| 86  | n/a | 98.8 | n/a | 86  | 85.7 | 74.1 | 45.8 | 86  | n/a | 100.0 | n/a | 86  | 98.6 | 25.0 | 74.1 |
| 87  | n/a | 98.8 | n/a | 87  | 85.7 | 74.1 | 43.7 | 87  | n/a | 100.0 | n/a | 87  | 98.6 | 25.0 | 72.5 |
| 88  | n/a | 98.8 | n/a | 88  | 85.7 | 74.1 | 41.4 | 88  | n/a | 100.0 | n/a | 88  | 98.6 | 25.0 | 70.6 |
| 89  | n/a | 98.8 | n/a | 89  | 85.7 | 74.1 | 39.1 | 89  | n/a | 100.0 | n/a | 89  | 98.6 | 25.0 | 68.5 |
| 90  | n/a | 98.8 | n/a | 90  | 85.7 | 74.1 | 36.6 | 90  | n/a | 100.0 | n/a | 90  | 98.6 | 25.0 | 66.2 |
| 91  | n/a | 98.8 | n/a | 91  | 85.7 | 74.1 | 33.9 | 91  | n/a | 100.0 | n/a | 91  | 98.6 | 25.0 | 63.5 |
| 92  | n/a | 98.8 | n/a | 92  | 85.7 | 74.1 | 31.1 | 92  | n/a | 100.0 | n/a | 92  | 98.6 | 25.0 | 60.5 |
| 93  | n/a | 98.8 | n/a | 93  | 85.7 | 74.1 | 28.1 | 93  | n/a | 100.0 | n/a | 93  | 98.6 | 25.0 | 57.0 |
| 94  | n/a | 98.8 | n/a | 94  | 85.7 | 74.1 | 24.9 | 94  | n/a | 100.0 | n/a | 94  | 98.6 | 25.0 | 52.9 |
| 95  | n/a | 98.8 | n/a | 95  | 85.7 | 74.1 | 21.4 | 95  | n/a | 100.0 | n/a | 95  | 98.6 | 25.0 | 48.1 |
| 96  | n/a | 98.8 | n/a | 96  | 85.7 | 74.1 | 17.8 | 96  | n/a | 100.0 | n/a | 96  | 98.6 | 25.0 | 42.3 |
| 97  | n/a | 98.8 | n/a | 97  | 85.7 | 74.1 | 13.8 | 97  | n/a | 100.0 | n/a | 97  | 98.6 | 25.0 | 35.3 |
| 98  | n/a | 98.8 | n/a | 98  | 85.7 | 74.1 | 9.6  | 98  | n/a | 100.0 | n/a | 98  | 98.6 | 25.0 | 26.4 |
| 99  | n/a | 98.8 | n/a | 99  | 85.7 | 74.1 | 5.0  | 99  | n/a | 100.0 | n/a | 99  | 98.6 | 25.0 | 15.1 |
| 100 | n/a | 98.8 | n/a | 100 | 85.7 | 74.1 | 0.0  | 100 | n/a | 100.0 | n/a | 100 | 98.6 | 25.0 | 0.0  |

| <u>SSS-</u>                           |             |             |                           | <u>RSS-</u>                           |             |             |                           | <u>RRS-</u>                           |             |             |                           | <u>SRS-</u>                           |             |             |                           |      |
|---------------------------------------|-------------|-------------|---------------------------|---------------------------------------|-------------|-------------|---------------------------|---------------------------------------|-------------|-------------|---------------------------|---------------------------------------|-------------|-------------|---------------------------|------|
| Prevalence of pyrazinamide resistance | Sensitivity | Specificity | Negative Predictive Value | Prevalence of pyrazinamide resistance | Sensitivity | Specificity | Negative Predictive Value | Prevalence of pyrazinamide resistance | Sensitivity | Specificity | Negative Predictive Value | Prevalence of pyrazinamide resistance | Sensitivity | Specificity | Negative Predictive Value |      |
| 1                                     |             | 72.5        | 99.8                      | 99.7                                  | 1           | 61.9        | 98.9                      | 99.6                                  | 1           | 86.9        | 88.4                      | 99.9                                  | 1           | 0.0         | 100.0                     | 99.0 |
| 2                                     |             | 72.5        | 99.8                      | 99.4                                  | 2           | 61.9        | 98.9                      | 99.2                                  | 2           | 86.9        | 88.4                      | 99.7                                  | 2           | 0.0         | 100.0                     | 98.0 |
| 3                                     |             | 72.5        | 99.8                      | 99.2                                  | 3           | 61.9        | 98.9                      | 98.8                                  | 3           | 86.9        | 88.4                      | 99.5                                  | 3           | 0.0         | 100.0                     | 97.0 |
| 4                                     |             | 72.5        | 99.8                      | 98.9                                  | 4           | 61.9        | 98.9                      | 98.4                                  | 4           | 86.9        | 88.4                      | 99.4                                  | 4           | 0.0         | 100.0                     | 96.0 |
| 5                                     |             | 72.5        | 99.8                      | 98.6                                  | 5           | 61.9        | 98.9                      | 98.0                                  | 5           | 86.9        | 88.4                      | 99.2                                  | 5           | 0.0         | 100.0                     | 95.0 |
| 6                                     |             | 72.5        | 99.8                      | 98.3                                  | 6           | 61.9        | 98.9                      | 97.6                                  | 6           | 86.9        | 88.4                      | 99.1                                  | 6           | 0.0         | 100.0                     | 94.0 |
| 7                                     |             | 72.5        | 99.8                      | 98.0                                  | 7           | 61.9        | 98.9                      | 97.2                                  | 7           | 86.9        | 88.4                      | 98.9                                  | 7           | 0.0         | 100.0                     | 93.0 |
| 8                                     |             | 72.5        | 99.8                      | 97.7                                  | 8           | 61.9        | 98.9                      | 96.8                                  | 8           | 86.9        | 88.4                      | 98.7                                  | 8           | 0.0         | 100.0                     | 92.0 |
| 9                                     |             | 72.5        | 99.8                      | 97.4                                  | 9           | 61.9        | 98.9                      | 96.3                                  | 9           | 86.9        | 88.4                      | 98.6                                  | 9           | 0.0         | 100.0                     | 91.0 |
| 10                                    |             | 72.5        | 99.8                      | 97.0                                  | 10          | 61.9        | 98.9                      | 95.9                                  | 10          | 86.9        | 88.4                      | 98.4                                  | 10          | 0.0         | 100.0                     | 90.0 |
| 11                                    |             | 72.5        | 99.8                      | 96.7                                  | 11          | 61.9        | 98.9                      | 95.5                                  | 11          | 86.9        | 88.4                      | 98.2                                  | 11          | 0.0         | 100.0                     | 89.0 |
| 12                                    |             | 72.5        | 99.8                      | 96.4                                  | 12          | 61.9        | 98.9                      | 95.0                                  | 12          | 86.9        | 88.4                      | 98.0                                  | 12          | 0.0         | 100.0                     | 88.0 |
| 13                                    |             | 72.5        | 99.8                      | 96.1                                  | 13          | 61.9        | 98.9                      | 94.6                                  | 13          | 86.9        | 88.4                      | 97.8                                  | 13          | 0.0         | 100.0                     | 87.0 |
| 14                                    |             | 72.5        | 99.8                      | 95.7                                  | 14          | 61.9        | 98.9                      | 94.1                                  | 14          | 86.9        | 88.4                      | 97.6                                  | 14          | 0.0         | 100.0                     | 86.0 |
| 15                                    |             | 72.5        | 99.8                      | 95.4                                  | 15          | 61.9        | 98.9                      | 93.6                                  | 15          | 86.9        | 88.4                      | 97.5                                  | 15          | 0.0         | 100.0                     | 85.0 |
| 16                                    |             | 72.5        | 99.8                      | 95.0                                  | 16          | 61.9        | 98.9                      | 93.2                                  | 16          | 86.9        | 88.4                      | 97.3                                  | 16          | 0.0         | 100.0                     | 84.0 |
| 17                                    |             | 72.5        | 99.8                      | 94.7                                  | 17          | 61.9        | 98.9                      | 92.7                                  | 17          | 86.9        | 88.4                      | 97.1                                  | 17          | 0.0         | 100.0                     | 83.0 |
| 18                                    |             | 72.5        | 99.8                      | 94.3                                  | 18          | 61.9        | 98.9                      | 92.2                                  | 18          | 86.9        | 88.4                      | 96.9                                  | 18          | 0.0         | 100.0                     | 82.0 |
| 19                                    |             | 72.5        | 99.8                      | 93.9                                  | 19          | 61.9        | 98.9                      | 91.7                                  | 19          | 86.9        | 88.4                      | 96.6                                  | 19          | 0.0         | 100.0                     | 81.0 |
| 20                                    |             | 72.5        | 99.8                      | 93.6                                  | 20          | 61.9        | 98.9                      | 91.2                                  | 20          | 86.9        | 88.4                      | 96.4                                  | 20          | 0.0         | 100.0                     | 80.0 |
| 21                                    |             | 72.5        | 99.8                      | 93.2                                  | 21          | 61.9        | 98.9                      | 90.7                                  | 21          | 86.9        | 88.4                      | 96.2                                  | 21          | 0.0         | 100.0                     | 79.0 |
| 22                                    |             | 72.5        | 99.8                      | 92.8                                  | 22          | 61.9        | 98.9                      | 90.2                                  | 22          | 86.9        | 88.4                      | 96.0                                  | 22          | 0.0         | 100.0                     | 78.0 |
| 23                                    |             | 72.5        | 99.8                      | 92.4                                  | 23          | 61.9        | 98.9                      | 89.7                                  | 23          | 86.9        | 88.4                      | 95.8                                  | 23          | 0.0         | 100.0                     | 77.0 |
| 24                                    |             | 72.5        | 99.8                      | 92.0                                  | 24          | 61.9        | 98.9                      | 89.2                                  | 24          | 86.9        | 88.4                      | 95.5                                  | 24          | 0.0         | 100.0                     | 76.0 |
| 25                                    |             | 72.5        | 99.8                      | 91.6                                  | 25          | 61.9        | 98.9                      | 88.6                                  | 25          | 86.9        | 88.4                      | 95.3                                  | 25          | 0.0         | 100.0                     | 75.0 |
| 26                                    |             | 72.5        | 99.8                      | 91.2                                  | 26          | 61.9        | 98.9                      | 88.1                                  | 26          | 86.9        | 88.4                      | 95.1                                  | 26          | 0.0         | 100.0                     | 74.0 |
| 27                                    |             | 72.5        | 99.8                      | 90.8                                  | 27          | 61.9        | 98.9                      | 87.5                                  | 27          | 86.9        | 88.4                      | 94.8                                  | 27          | 0.0         | 100.0                     | 73.0 |
| 28                                    |             | 72.5        | 99.8                      | 90.3                                  | 28          | 61.9        | 98.9                      | 87.0                                  | 28          | 86.9        | 88.4                      | 94.6                                  | 28          | 0.0         | 100.0                     | 72.0 |
| 29                                    |             | 72.5        | 99.8                      | 89.9                                  | 29          | 61.9        | 98.9                      | 86.4                                  | 29          | 86.9        | 88.4                      | 94.3                                  | 29          | 0.0         | 100.0                     | 71.0 |
| 30                                    |             | 72.5        | 99.8                      | 89.5                                  | 30          | 61.9        | 98.9                      | 85.8                                  | 30          | 86.9        | 88.4                      | 94.0                                  | 30          | 0.0         | 100.0                     | 70.0 |
| 31                                    |             | 72.5        | 99.8                      | 89.0                                  | 31          | 61.9        | 98.9                      | 85.2                                  | 31          | 86.9        | 88.4                      | 93.8                                  | 31          | 0.0         | 100.0                     | 69.0 |
| 32                                    |             | 72.5        | 99.8                      | 88.5                                  | 32          | 61.9        | 98.9                      | 84.6                                  | 32          | 86.9        | 88.4                      | 93.5                                  | 32          | 0.0         | 100.0                     | 68.0 |
| 33                                    |             | 72.5        | 99.8                      | 88.1                                  | 33          | 61.9        | 98.9                      | 84.0                                  | 33          | 86.9        | 88.4                      | 93.2                                  | 33          | 0.0         | 100.0                     | 67.0 |
| 34                                    |             | 72.5        | 99.8                      | 87.6                                  | 34          | 61.9        | 98.9                      | 83.4                                  | 34          | 86.9        | 88.4                      | 92.9                                  | 34          | 0.0         | 100.0                     | 66.0 |
| 35                                    |             | 72.5        | 99.8                      | 87.1                                  | 35          | 61.9        | 98.9                      | 82.8                                  | 35          | 86.9        | 88.4                      | 92.6                                  | 35          | 0.0         | 100.0                     | 65.0 |

|     |      |      |      |     |      |      |      |     |      |      |      |     |     |       |      |
|-----|------|------|------|-----|------|------|------|-----|------|------|------|-----|-----|-------|------|
| 37  | 72.5 | 99.8 | 86.1 | 37  | 61.9 | 98.9 | 81.5 | 37  | 86.9 | 88.4 | 92.0 | 37  | 0.0 | 100.0 | 63.0 |
| 38  | 72.5 | 99.8 | 85.6 | 38  | 61.9 | 98.9 | 80.9 | 38  | 86.9 | 88.4 | 91.7 | 38  | 0.0 | 100.0 | 62.0 |
| 39  | 72.5 | 99.8 | 85.0 | 39  | 61.9 | 98.9 | 80.2 | 39  | 86.9 | 88.4 | 91.4 | 39  | 0.0 | 100.0 | 61.0 |
| 40  | 72.5 | 99.8 | 84.5 | 40  | 61.9 | 98.9 | 79.6 | 40  | 86.9 | 88.4 | 91.0 | 40  | 0.0 | 100.0 | 60.0 |
| 41  | 72.5 | 99.8 | 83.9 | 41  | 61.9 | 98.9 | 78.9 | 41  | 86.9 | 88.4 | 90.7 | 41  | 0.0 | 100.0 | 59.0 |
| 42  | 72.5 | 99.8 | 83.4 | 42  | 61.9 | 98.9 | 78.2 | 42  | 86.9 | 88.4 | 90.3 | 42  | 0.0 | 100.0 | 58.0 |
| 43  | 72.5 | 99.8 | 82.8 | 43  | 61.9 | 98.9 | 77.5 | 43  | 86.9 | 88.4 | 90.0 | 43  | 0.0 | 100.0 | 57.0 |
| 44  | 72.5 | 99.8 | 82.2 | 44  | 61.9 | 98.9 | 76.8 | 44  | 86.9 | 88.4 | 89.6 | 44  | 0.0 | 100.0 | 56.0 |
| 45  | 72.5 | 99.8 | 81.6 | 45  | 61.9 | 98.9 | 76.0 | 45  | 86.9 | 88.4 | 89.2 | 45  | 0.0 | 100.0 | 55.0 |
| 46  | 72.5 | 99.8 | 81.0 | 46  | 61.9 | 98.9 | 75.3 | 46  | 86.9 | 88.4 | 88.8 | 46  | 0.0 | 100.0 | 54.0 |
| 47  | 72.5 | 99.8 | 80.4 | 47  | 61.9 | 98.9 | 74.5 | 47  | 86.9 | 88.4 | 88.4 | 47  | 0.0 | 100.0 | 53.0 |
| 48  | 72.5 | 99.8 | 79.7 | 48  | 61.9 | 98.9 | 73.8 | 48  | 86.9 | 88.4 | 88.0 | 48  | 0.0 | 100.0 | 52.0 |
| 49  | 72.5 | 99.8 | 79.1 | 49  | 61.9 | 98.9 | 73.0 | 49  | 86.9 | 88.4 | 87.5 | 49  | 0.0 | 100.0 | 51.0 |
| 50  | 72.5 | 99.8 | 78.4 | 50  | 61.9 | 98.9 | 72.2 | 50  | 86.9 | 88.4 | 87.1 | 50  | 0.0 | 100.0 | 50.0 |
| 51  | 72.5 | 99.8 | 77.7 | 51  | 61.9 | 98.9 | 71.4 | 51  | 86.9 | 88.4 | 86.6 | 51  | 0.0 | 100.0 | 49.0 |
| 52  | 72.5 | 99.8 | 77.0 | 52  | 61.9 | 98.9 | 70.5 | 52  | 86.9 | 88.4 | 86.2 | 52  | 0.0 | 100.0 | 48.0 |
| 53  | 72.5 | 99.8 | 76.3 | 53  | 61.9 | 98.9 | 69.7 | 53  | 86.9 | 88.4 | 85.7 | 53  | 0.0 | 100.0 | 47.0 |
| 54  | 72.5 | 99.8 | 75.6 | 54  | 61.9 | 98.9 | 68.9 | 54  | 86.9 | 88.4 | 85.2 | 54  | 0.0 | 100.0 | 46.0 |
| 55  | 72.5 | 99.8 | 74.8 | 55  | 61.9 | 98.9 | 68.0 | 55  | 86.9 | 88.4 | 84.7 | 55  | 0.0 | 100.0 | 45.0 |
| 56  | 72.5 | 99.8 | 74.1 | 56  | 61.9 | 98.9 | 67.1 | 56  | 86.9 | 88.4 | 84.1 | 56  | 0.0 | 100.0 | 44.0 |
| 57  | 72.5 | 99.8 | 73.3 | 57  | 61.9 | 98.9 | 66.2 | 57  | 86.9 | 88.4 | 83.6 | 57  | 0.0 | 100.0 | 43.0 |
| 58  | 72.5 | 99.8 | 72.5 | 58  | 61.9 | 98.9 | 65.3 | 58  | 86.9 | 88.4 | 83.0 | 58  | 0.0 | 100.0 | 42.0 |
| 59  | 72.5 | 99.8 | 71.6 | 59  | 61.9 | 98.9 | 64.3 | 59  | 86.9 | 88.4 | 82.4 | 59  | 0.0 | 100.0 | 41.0 |
| 60  | 72.5 | 99.8 | 70.8 | 60  | 61.9 | 98.9 | 63.4 | 60  | 86.9 | 88.4 | 81.8 | 60  | 0.0 | 100.0 | 40.0 |
| 61  | 72.5 | 99.8 | 69.9 | 61  | 61.9 | 98.9 | 62.4 | 61  | 86.9 | 88.4 | 81.2 | 61  | 0.0 | 100.0 | 39.0 |
| 62  | 72.5 | 99.8 | 69.0 | 62  | 61.9 | 98.9 | 61.4 | 62  | 86.9 | 88.4 | 80.5 | 62  | 0.0 | 100.0 | 38.0 |
| 63  | 72.5 | 99.8 | 68.1 | 63  | 61.9 | 98.9 | 60.4 | 63  | 86.9 | 88.4 | 79.9 | 63  | 0.0 | 100.0 | 37.0 |
| 64  | 72.5 | 99.8 | 67.1 | 64  | 61.9 | 98.9 | 59.3 | 64  | 86.9 | 88.4 | 79.2 | 64  | 0.0 | 100.0 | 36.0 |
| 65  | 72.5 | 99.8 | 66.2 | 65  | 61.9 | 98.9 | 58.3 | 65  | 86.9 | 88.4 | 78.4 | 65  | 0.0 | 100.0 | 35.0 |
| 66  | 72.5 | 99.8 | 65.2 | 66  | 61.9 | 98.9 | 57.2 | 66  | 86.9 | 88.4 | 77.7 | 66  | 0.0 | 100.0 | 34.0 |
| 67  | 72.5 | 99.8 | 64.2 | 67  | 61.9 | 98.9 | 56.1 | 67  | 86.9 | 88.4 | 76.9 | 67  | 0.0 | 100.0 | 33.0 |
| 68  | 72.5 | 99.8 | 63.1 | 68  | 61.9 | 98.9 | 55.0 | 68  | 86.9 | 88.4 | 76.1 | 68  | 0.0 | 100.0 | 32.0 |
| 69  | 72.5 | 99.8 | 62.0 | 69  | 61.9 | 98.9 | 53.8 | 69  | 86.9 | 88.4 | 75.2 | 69  | 0.0 | 100.0 | 31.0 |
| 70  | 72.5 | 99.8 | 60.9 | 70  | 61.9 | 98.9 | 52.7 | 70  | 86.9 | 88.4 | 74.3 | 70  | 0.0 | 100.0 | 30.0 |
| 71  | 72.5 | 99.8 | 59.7 | 71  | 61.9 | 98.9 | 51.5 | 71  | 86.9 | 88.4 | 73.4 | 71  | 0.0 | 100.0 | 29.0 |
| 72  | 72.5 | 99.8 | 58.6 | 72  | 61.9 | 98.9 | 50.2 | 72  | 86.9 | 88.4 | 72.4 | 72  | 0.0 | 100.0 | 28.0 |
| 73  | 72.5 | 99.8 | 57.3 | 73  | 61.9 | 98.9 | 49.0 | 73  | 86.9 | 88.4 | 71.4 | 73  | 0.0 | 100.0 | 27.0 |
| 74  | 72.5 | 99.8 | 56.1 | 74  | 61.9 | 98.9 | 47.7 | 74  | 86.9 | 88.4 | 70.4 | 74  | 0.0 | 100.0 | 26.0 |
| 75  | 72.5 | 99.8 | 54.8 | 75  | 61.9 | 98.9 | 46.4 | 75  | 86.9 | 88.4 | 69.2 | 75  | 0.0 | 100.0 | 25.0 |
| 76  | 72.5 | 99.8 | 53.4 | 76  | 61.9 | 98.9 | 45.0 | 76  | 86.9 | 88.4 | 68.1 | 76  | 0.0 | 100.0 | 24.0 |
| 77  | 72.5 | 99.8 | 52.0 | 77  | 61.9 | 98.9 | 43.7 | 77  | 86.9 | 88.4 | 66.9 | 77  | 0.0 | 100.0 | 23.0 |
| 78  | 72.5 | 99.8 | 50.6 | 78  | 61.9 | 98.9 | 42.3 | 78  | 86.9 | 88.4 | 65.6 | 78  | 0.0 | 100.0 | 22.0 |
| 79  | 72.5 | 99.8 | 49.1 | 79  | 61.9 | 98.9 | 40.8 | 79  | 86.9 | 88.4 | 64.2 | 79  | 0.0 | 100.0 | 21.0 |
| 80  | 72.5 | 99.8 | 47.6 | 80  | 61.9 | 98.9 | 39.3 | 80  | 86.9 | 88.4 | 62.8 | 80  | 0.0 | 100.0 | 20.0 |
| 81  | 72.5 | 99.8 | 46.0 | 81  | 61.9 | 98.9 | 37.8 | 81  | 86.9 | 88.4 | 61.3 | 81  | 0.0 | 100.0 | 19.0 |
| 82  | 72.5 | 99.8 | 44.4 | 82  | 61.9 | 98.9 | 36.3 | 82  | 86.9 | 88.4 | 59.7 | 82  | 0.0 | 100.0 | 18.0 |
| 83  | 72.5 | 99.8 | 42.7 | 83  | 61.9 | 98.9 | 34.7 | 83  | 86.9 | 88.4 | 58.0 | 83  | 0.0 | 100.0 | 17.0 |
| 84  | 72.5 | 99.8 | 40.9 | 84  | 61.9 | 98.9 | 33.1 | 84  | 86.9 | 88.4 | 56.3 | 84  | 0.0 | 100.0 | 16.0 |
| 85  | 72.5 | 99.8 | 39.1 | 85  | 61.9 | 98.9 | 31.4 | 85  | 86.9 | 88.4 | 54.4 | 85  | 0.0 | 100.0 | 15.0 |
| 86  | 72.5 | 99.8 | 37.2 | 86  | 61.9 | 98.9 | 29.7 | 86  | 86.9 | 88.4 | 52.4 | 86  | 0.0 | 100.0 | 14.0 |
| 87  | 72.5 | 99.8 | 35.2 | 87  | 61.9 | 98.9 | 27.9 | 87  | 86.9 | 88.4 | 50.2 | 87  | 0.0 | 100.0 | 13.0 |
| 88  | 72.5 | 99.8 | 33.1 | 88  | 61.9 | 98.9 | 26.1 | 88  | 86.9 | 88.4 | 47.9 | 88  | 0.0 | 100.0 | 12.0 |
| 89  | 72.5 | 99.8 | 31.0 | 89  | 61.9 | 98.9 | 24.3 | 89  | 86.9 | 88.4 | 45.5 | 89  | 0.0 | 100.0 | 11.0 |
| 90  | 72.5 | 99.8 | 28.8 | 90  | 61.9 | 98.9 | 22.4 | 90  | 86.9 | 88.4 | 42.9 | 90  | 0.0 | 100.0 | 10.0 |
| 91  | 72.5 | 99.8 | 26.4 | 91  | 61.9 | 98.9 | 20.4 | 91  | 86.9 | 88.4 | 40.1 | 91  | 0.0 | 100.0 | 9.0  |
| 92  | 72.5 | 99.8 | 24.0 | 92  | 61.9 | 98.9 | 18.4 | 92  | 86.9 | 88.4 | 37.0 | 92  | 0.0 | 100.0 | 8.0  |
| 93  | 72.5 | 99.8 | 21.5 | 93  | 61.9 | 98.9 | 16.3 | 93  | 86.9 | 88.4 | 33.7 | 93  | 0.0 | 100.0 | 7.0  |
| 94  | 72.5 | 99.8 | 18.8 | 94  | 61.9 | 98.9 | 14.2 | 94  | 86.9 | 88.4 | 30.1 | 94  | 0.0 | 100.0 | 6.0  |
| 95  | 72.5 | 99.8 | 16.1 | 95  | 61.9 | 98.9 | 12.0 | 95  | 86.9 | 88.4 | 26.2 | 95  | 0.0 | 100.0 | 5.0  |
| 96  | 72.5 | 99.8 | 13.1 | 96  | 61.9 | 98.9 | 9.8  | 96  | 86.9 | 88.4 | 22.0 | 96  | 0.0 | 100.0 | 4.0  |
| 97  | 72.5 | 99.8 | 10.1 | 97  | 61.9 | 98.9 | 7.4  | 97  | 86.9 | 88.4 | 17.3 | 97  | 0.0 | 100.0 | 3.0  |
| 98  | 72.5 | 99.8 | 6.9  | 98  | 61.9 | 98.9 | 5.0  | 98  | 86.9 | 88.4 | 12.1 | 98  | 0.0 | 100.0 | 2.0  |
| 99  | 72.5 | 99.8 | 3.5  | 99  | 61.9 | 98.9 | 2.6  | 99  | 86.9 | 88.4 | 6.4  | 99  | 0.0 | 100.0 | 1.0  |
| 100 | 72.5 | 99.8 | 0.0  | 100 | 61.9 | 98.9 | 0.0  | 100 | 86.9 | 88.4 | 0.0  | 100 | 0.0 | 100.0 | 0.0  |

**RRR-**

| Prevalence of pyrazinamide resistance | Sensitivity | Specificity | Negative Predictive Value |
|---------------------------------------|-------------|-------------|---------------------------|
| 1                                     | 97.3        | 66.9        | 100.0                     |
| 2                                     | 97.3        | 66.9        | 99.9                      |
| 3                                     | 97.3        | 66.9        | 99.9                      |
| 4                                     | 97.3        | 66.9        | 99.8                      |
| 5                                     | 97.3        | 66.9        | 99.8                      |
| 6                                     | 97.3        | 66.9        | 99.7                      |
| 7                                     | 97.3        | 66.9        | 99.7                      |
| 8                                     | 97.3        | 66.9        | 99.6                      |
| 9                                     | 97.3        | 66.9        | 99.6                      |
| 10                                    | 97.3        | 66.9        | 99.5                      |
| 11                                    | 97.3        | 66.9        | 99.5                      |
| 12                                    | 97.3        | 66.9        | 99.4                      |
| 13                                    | 97.3        | 66.9        | 99.4                      |
| 14                                    | 97.3        | 66.9        | 99.3                      |
| 15                                    | 97.3        | 66.9        | 99.3                      |
| 16                                    | 97.3        | 66.9        | 99.2                      |
| 17                                    | 97.3        | 66.9        | 99.2                      |
| 18                                    | 97.3        | 66.9        | 99.1                      |
| 19                                    | 97.3        | 66.9        | 99.0                      |
| 20                                    | 97.3        | 66.9        | 99.0                      |
| 21                                    | 97.3        | 66.9        | 98.9                      |
| 22                                    | 97.3        | 66.9        | 98.9                      |
| 23                                    | 97.3        | 66.9        | 98.8                      |
| 24                                    | 97.3        | 66.9        | 98.7                      |
| 25                                    | 97.3        | 66.9        | 98.7                      |
| 26                                    | 97.3        | 66.9        | 98.6                      |

**SRR-**

| Prevalence of pyrazinamide resistance | Sensitivity | Specificity | Negative Predictive Value |
|---------------------------------------|-------------|-------------|---------------------------|
| 1                                     | n/a         | 100.0       | n/a                       |
| 2                                     | n/a         | 100.0       | n/a                       |
| 3                                     | n/a         | 100.0       | n/a                       |
| 4                                     | n/a         | 100.0       | n/a                       |
| 5                                     | n/a         | 100.0       | n/a                       |
| 6                                     | n/a         | 100.0       | n/a                       |
| 7                                     | n/a         | 100.0       | n/a                       |
| 8                                     | n/a         | 100.0       | n/a                       |
| 9                                     | n/a         | 100.0       | n/a                       |
| 10                                    | n/a         | 100.0       | n/a                       |
| 11                                    | n/a         | 100.0       | n/a                       |
| 12                                    | n/a         | 100.0       | n/a                       |
| 13                                    | n/a         | 100.0       | n/a                       |
| 14                                    | n/a         | 100.0       | n/a                       |
| 15                                    | n/a         | 100.0       | n/a                       |
| 16                                    | n/a         | 100.0       | n/a                       |
| 17                                    | n/a         | 100.0       | n/a                       |
| 18                                    | n/a         | 100.0       | n/a                       |
| 19                                    | n/a         | 100.0       | n/a                       |
| 20                                    | n/a         | 100.0       | n/a                       |
| 21                                    | n/a         | 100.0       | n/a                       |
| 22                                    | n/a         | 100.0       | n/a                       |
| 23                                    | n/a         | 100.0       | n/a                       |
| 24                                    | n/a         | 100.0       | n/a                       |
| 25                                    | n/a         | 100.0       | n/a                       |
| 26                                    | n/a         | 100.0       | n/a                       |

**RSR-**

| Prevalence of pyrazinamide resistance | Sensitivity | Specificity | Negative Predictive Value |
|---------------------------------------|-------------|-------------|---------------------------|
| 1                                     | 83.3        | 100.0       | 99.8                      |
| 2                                     | 83.3        | 100.0       | 99.7                      |
| 3                                     | 83.3        | 100.0       | 99.5                      |
| 4                                     | 83.3        | 100.0       | 99.3                      |
| 5                                     | 83.3        | 100.0       | 99.1                      |
| 6                                     | 83.3        | 100.0       | 98.9                      |
| 7                                     | 83.3        | 100.0       | 98.8                      |
| 8                                     | 83.3        | 100.0       | 98.6                      |
| 9                                     | 83.3        | 100.0       | 98.4                      |
| 10                                    | 83.3        | 100.0       | 98.2                      |
| 11                                    | 83.3        | 100.0       | 98.0                      |
| 12                                    | 83.3        | 100.0       | 97.8                      |
| 13                                    | 83.3        | 100.0       | 97.6                      |
| 14                                    | 83.3        | 100.0       | 97.4                      |
| 15                                    | 83.3        | 100.0       | 97.1                      |
| 16                                    | 83.3        | 100.0       | 96.9                      |
| 17                                    | 83.3        | 100.0       | 96.7                      |
| 18                                    | 83.3        | 100.0       | 96.5                      |
| 19                                    | 83.3        | 100.0       | 96.2                      |
| 20                                    | 83.3        | 100.0       | 96.0                      |
| 21                                    | 83.3        | 100.0       | 95.8                      |
| 22                                    | 83.3        | 100.0       | 95.5                      |
| 23                                    | 83.3        | 100.0       | 95.3                      |
| 24                                    | 83.3        | 100.0       | 95.0                      |
| 25                                    | 83.3        | 100.0       | 94.7                      |
| 26                                    | 83.3        | 100.0       |                           |

|     |      |      |      |     |     |       |     |     |      |       |      |     |     |       |     |
|-----|------|------|------|-----|-----|-------|-----|-----|------|-------|------|-----|-----|-------|-----|
| 27  | 97.3 | 66.9 | 98.5 | 27  | n/a | 100.0 | n/a | 27  | 83.3 | 100.0 | 94.2 | 27  | n/a | 100.0 | n/a |
| 28  | 97.3 | 66.9 | 98.4 | 28  | n/a | 100.0 | n/a | 28  | 83.3 | 100.0 | 93.9 | 28  | n/a | 100.0 | n/a |
| 29  | 97.3 | 66.9 | 98.4 | 29  | n/a | 100.0 | n/a | 29  | 83.3 | 100.0 | 93.6 | 29  | n/a | 100.0 | n/a |
| 30  | 97.3 | 66.9 | 98.3 | 30  | n/a | 100.0 | n/a | 30  | 83.3 | 100.0 | 93.3 | 30  | n/a | 100.0 | n/a |
| 31  | 97.3 | 66.9 | 98.2 | 31  | n/a | 100.0 | n/a | 31  | 83.3 | 100.0 | 93.0 | 31  | n/a | 100.0 | n/a |
| 32  | 97.3 | 66.9 | 98.1 | 32  | n/a | 100.0 | n/a | 32  | 83.3 | 100.0 | 92.7 | 32  | n/a | 100.0 | n/a |
| 33  | 97.3 | 66.9 | 98.0 | 33  | n/a | 100.0 | n/a | 33  | 83.3 | 100.0 | 92.4 | 33  | n/a | 100.0 | n/a |
| 34  | 97.3 | 66.9 | 97.9 | 34  | n/a | 100.0 | n/a | 34  | 83.3 | 100.0 | 92.1 | 34  | n/a | 100.0 | n/a |
| 35  | 97.3 | 66.9 | 97.8 | 35  | n/a | 100.0 | n/a | 35  | 83.3 | 100.0 | 91.8 | 35  | n/a | 100.0 | n/a |
| 36  | 97.3 | 66.9 | 97.7 | 36  | n/a | 100.0 | n/a | 36  | 83.3 | 100.0 | 91.4 | 36  | n/a | 100.0 | n/a |
| 37  | 97.3 | 66.9 | 97.6 | 37  | n/a | 100.0 | n/a | 37  | 83.3 | 100.0 | 91.1 | 37  | n/a | 100.0 | n/a |
| 38  | 97.3 | 66.9 | 97.5 | 38  | n/a | 100.0 | n/a | 38  | 83.3 | 100.0 | 90.7 | 38  | n/a | 100.0 | n/a |
| 39  | 97.3 | 66.9 | 97.4 | 39  | n/a | 100.0 | n/a | 39  | 83.3 | 100.0 | 90.4 | 39  | n/a | 100.0 | n/a |
| 40  | 97.3 | 66.9 | 97.3 | 40  | n/a | 100.0 | n/a | 40  | 83.3 | 100.0 | 90.0 | 40  | n/a | 100.0 | n/a |
| 41  | 97.3 | 66.9 | 97.2 | 41  | n/a | 100.0 | n/a | 41  | 83.3 | 100.0 | 89.6 | 41  | n/a | 100.0 | n/a |
| 42  | 97.3 | 66.9 | 97.1 | 42  | n/a | 100.0 | n/a | 42  | 83.3 | 100.0 | 89.2 | 42  | n/a | 100.0 | n/a |
| 43  | 97.3 | 66.9 | 97.0 | 43  | n/a | 100.0 | n/a | 43  | 83.3 | 100.0 | 88.8 | 43  | n/a | 100.0 | n/a |
| 44  | 97.3 | 66.9 | 96.9 | 44  | n/a | 100.0 | n/a | 44  | 83.3 | 100.0 | 88.4 | 44  | n/a | 100.0 | n/a |
| 45  | 97.3 | 66.9 | 96.8 | 45  | n/a | 100.0 | n/a | 45  | 83.3 | 100.0 | 88.0 | 45  | n/a | 100.0 | n/a |
| 46  | 97.3 | 66.9 | 96.6 | 46  | n/a | 100.0 | n/a | 46  | 83.3 | 100.0 | 87.6 | 46  | n/a | 100.0 | n/a |
| 47  | 97.3 | 66.9 | 96.5 | 47  | n/a | 100.0 | n/a | 47  | 83.3 | 100.0 | 87.1 | 47  | n/a | 100.0 | n/a |
| 48  | 97.3 | 66.9 | 96.4 | 48  | n/a | 100.0 | n/a | 48  | 83.3 | 100.0 | 86.7 | 48  | n/a | 100.0 | n/a |
| 49  | 97.3 | 66.9 | 96.2 | 49  | n/a | 100.0 | n/a | 49  | 83.3 | 100.0 | 86.2 | 49  | n/a | 100.0 | n/a |
| 50  | 97.3 | 66.9 | 96.1 | 50  | n/a | 100.0 | n/a | 50  | 83.3 | 100.0 | 85.7 | 50  | n/a | 100.0 | n/a |
| 51  | 97.3 | 66.9 | 95.9 | 51  | n/a | 100.0 | n/a | 51  | 83.3 | 100.0 | 85.2 | 51  | n/a | 100.0 | n/a |
| 52  | 97.3 | 66.9 | 95.7 | 52  | n/a | 100.0 | n/a | 52  | 83.3 | 100.0 | 84.7 | 52  | n/a | 100.0 | n/a |
| 53  | 97.3 | 66.9 | 95.6 | 53  | n/a | 100.0 | n/a | 53  | 83.3 | 100.0 | 84.2 | 53  | n/a | 100.0 | n/a |
| 54  | 97.3 | 66.9 | 95.4 | 54  | n/a | 100.0 | n/a | 54  | 83.3 | 100.0 | 83.6 | 54  | n/a | 100.0 | n/a |
| 55  | 97.3 | 66.9 | 95.2 | 55  | n/a | 100.0 | n/a | 55  | 83.3 | 100.0 | 83.1 | 55  | n/a | 100.0 | n/a |
| 56  | 97.3 | 66.9 | 95.0 | 56  | n/a | 100.0 | n/a | 56  | 83.3 | 100.0 | 82.5 | 56  | n/a | 100.0 | n/a |
| 57  | 97.3 | 66.9 | 94.8 | 57  | n/a | 100.0 | n/a | 57  | 83.3 | 100.0 | 81.9 | 57  | n/a | 100.0 | n/a |
| 58  | 97.3 | 66.9 | 94.6 | 58  | n/a | 100.0 | n/a | 58  | 83.3 | 100.0 | 81.3 | 58  | n/a | 100.0 | n/a |
| 59  | 97.3 | 66.9 | 94.4 | 59  | n/a | 100.0 | n/a | 59  | 83.3 | 100.0 | 80.7 | 59  | n/a | 100.0 | n/a |
| 60  | 97.3 | 66.9 | 94.2 | 60  | n/a | 100.0 | n/a | 60  | 83.3 | 100.0 | 80.0 | 60  | n/a | 100.0 | n/a |
| 61  | 97.3 | 66.9 | 94.0 | 61  | n/a | 100.0 | n/a | 61  | 83.3 | 100.0 | 79.3 | 61  | n/a | 100.0 | n/a |
| 62  | 97.3 | 66.9 | 93.7 | 62  | n/a | 100.0 | n/a | 62  | 83.3 | 100.0 | 78.6 | 62  | n/a | 100.0 | n/a |
| 63  | 97.3 | 66.9 | 93.5 | 63  | n/a | 100.0 | n/a | 63  | 83.3 | 100.0 | 77.9 | 63  | n/a | 100.0 | n/a |
| 64  | 97.3 | 66.9 | 93.2 | 64  | n/a | 100.0 | n/a | 64  | 83.3 | 100.0 | 77.1 | 64  | n/a | 100.0 | n/a |
| 65  | 97.3 | 66.9 | 92.9 | 65  | n/a | 100.0 | n/a | 65  | 83.3 | 100.0 | 76.4 | 65  | n/a | 100.0 | n/a |
| 66  | 97.3 | 66.9 | 92.6 | 66  | n/a | 100.0 | n/a | 66  | 83.3 | 100.0 | 75.6 | 66  | n/a | 100.0 | n/a |
| 67  | 97.3 | 66.9 | 92.3 | 67  | n/a | 100.0 | n/a | 67  | 83.3 | 100.0 | 74.7 | 67  | n/a | 100.0 | n/a |
| 68  | 97.3 | 66.9 | 92.0 | 68  | n/a | 100.0 | n/a | 68  | 83.3 | 100.0 | 73.8 | 68  | n/a | 100.0 | n/a |
| 69  | 97.3 | 66.9 | 91.6 | 69  | n/a | 100.0 | n/a | 69  | 83.3 | 100.0 | 72.9 | 69  | n/a | 100.0 | n/a |
| 70  | 97.3 | 66.9 | 91.3 | 70  | n/a | 100.0 | n/a | 70  | 83.3 | 100.0 | 72.0 | 70  | n/a | 100.0 | n/a |
| 71  | 97.3 | 66.9 | 90.9 | 71  | n/a | 100.0 | n/a | 71  | 83.3 | 100.0 | 71.0 | 71  | n/a | 100.0 | n/a |
| 72  | 97.3 | 66.9 | 90.5 | 72  | n/a | 100.0 | n/a | 72  | 83.3 | 100.0 | 70.0 | 72  | n/a | 100.0 | n/a |
| 73  | 97.3 | 66.9 | 90.0 | 73  | n/a | 100.0 | n/a | 73  | 83.3 | 100.0 | 68.9 | 73  | n/a | 100.0 | n/a |
| 74  | 97.3 | 66.9 | 89.5 | 74  | n/a | 100.0 | n/a | 74  | 83.3 | 100.0 | 67.8 | 74  | n/a | 100.0 | n/a |
| 75  | 97.3 | 66.9 | 89.0 | 75  | n/a | 100.0 | n/a | 75  | 83.3 | 100.0 | 66.7 | 75  | n/a | 100.0 | n/a |
| 76  | 97.3 | 66.9 | 88.5 | 76  | n/a | 100.0 | n/a | 76  | 83.3 | 100.0 | 65.5 | 76  | n/a | 100.0 | n/a |
| 77  | 97.3 | 66.9 | 87.9 | 77  | n/a | 100.0 | n/a | 77  | 83.3 | 100.0 | 64.2 | 77  | n/a | 100.0 | n/a |
| 78  | 97.3 | 66.9 | 87.3 | 78  | n/a | 100.0 | n/a | 78  | 83.3 | 100.0 | 62.9 | 78  | n/a | 100.0 | n/a |
| 79  | 97.3 | 66.9 | 86.6 | 79  | n/a | 100.0 | n/a | 79  | 83.3 | 100.0 | 61.5 | 79  | n/a | 100.0 | n/a |
| 80  | 97.3 | 66.9 | 85.9 | 80  | n/a | 100.0 | n/a | 80  | 83.3 | 100.0 | 60.0 | 80  | n/a | 100.0 | n/a |
| 81  | 97.3 | 66.9 | 85.1 | 81  | n/a | 100.0 | n/a | 81  | 83.3 | 100.0 | 58.5 | 81  | n/a | 100.0 | n/a |
| 82  | 97.3 | 66.9 | 84.3 | 82  | n/a | 100.0 | n/a | 82  | 83.3 | 100.0 | 56.8 | 82  | n/a | 100.0 | n/a |
| 83  | 97.3 | 66.9 | 83.3 | 83  | n/a | 100.0 | n/a | 83  | 83.3 | 100.0 | 55.1 | 83  | n/a | 100.0 | n/a |
| 84  | 97.3 | 66.9 | 82.3 | 84  | n/a | 100.0 | n/a | 84  | 83.3 | 100.0 | 53.3 | 84  | n/a | 100.0 | n/a |
| 85  | 97.3 | 66.9 | 81.1 | 85  | n/a | 100.0 | n/a | 85  | 83.3 | 100.0 | 51.4 | 85  | n/a | 100.0 | n/a |
| 86  | 97.3 | 66.9 | 79.9 | 86  | n/a | 100.0 | n/a | 86  | 83.3 | 100.0 | 49.4 | 86  | n/a | 100.0 | n/a |
| 87  | 97.3 | 66.9 | 78.5 | 87  | n/a | 100.0 | n/a | 87  | 83.3 | 100.0 | 47.3 | 87  | n/a | 100.0 | n/a |
| 88  | 97.3 | 66.9 | 76.9 | 88  | n/a | 100.0 | n/a | 88  | 83.3 | 100.0 | 45.0 | 88  | n/a | 100.0 | n/a |
| 89  | 97.3 | 66.9 | 75.1 | 89  | n/a | 100.0 | n/a | 89  | 83.3 | 100.0 | 42.6 | 89  | n/a | 100.0 | n/a |
| 90  | 97.3 | 66.9 | 73.0 | 90  | n/a | 100.0 | n/a | 90  | 83.3 | 100.0 | 40.0 | 90  | n/a | 100.0 | n/a |
| 91  | 97.3 | 66.9 | 70.7 | 91  | n/a | 100.0 | n/a | 91  | 83.3 | 100.0 | 37.2 | 91  | n/a | 100.0 | n/a |
| 92  | 97.3 | 66.9 | 68.0 | 92  | n/a | 100.0 | n/a | 92  | 83.3 | 100.0 | 34.3 | 92  | n/a | 100.0 | n/a |
| 93  | 97.3 | 66.9 | 64.7 | 93  | n/a | 100.0 | n/a | 93  | 83.3 | 100.0 | 31.1 | 93  | n/a | 100.0 | n/a |
| 94  | 97.3 | 66.9 | 60.9 | 94  | n/a | 100.0 | n/a | 94  | 83.3 | 100.0 | 27.7 | 94  | n/a | 100.0 | n/a |
| 95  | 97.3 | 66.9 | 56.2 | 95  | n/a | 100.0 | n/a | 95  | 83.3 | 100.0 | 24.0 | 95  | n/a | 100.0 | n/a |
| 96  | 97.3 | 66.9 | 50.4 | 96  | n/a | 100.0 | n/a | 96  | 83.3 | 100.0 | 20.0 | 96  | n/a | 100.0 | n/a |
| 97  | 97.3 | 66.9 | 43.0 | 97  | n/a | 100.0 | n/a | 97  | 83.3 | 100.0 | 15.7 | 97  | n/a | 100.0 | n/a |
| 98  | 97.3 | 66.9 | 33.2 | 98  | n/a | 100.0 | n/a | 98  | 83.3 | 100.0 | 10.9 | 98  | n/a | 100.0 | n/a |
| 99  | 97.3 | 66.9 | 19.8 | 99  | n/a | 100.0 | n/a | 99  | 83.3 | 100.0 | 5.7  | 99  | n/a | 100.0 | n/a |
| 100 | 97.3 | 66.9 | 0.0  | 100 | n/a | 100.0 | n/a | 100 | 83.3 | 100.0 | 0.0  | 100 | n/a | 100.0 | n/a |

S4

|                                                | Resistant phenotype, n (%) |    |     |    |       | Susceptible phenotype, n (%) |       |     |     |       | PPV, (%) | NPV, (%) | Sensitivity (predicitons only) (%) | Sensitivity (all) (%) | Specificity (predicitons only) (%) | Specificity (all), (%) | No genotypic prediction made, (%) | Resistance prevalence (all) (%) | Resistance prevalence (predictions only) (%) | Difference in sensitivity vs. non deduplicated results (p-value) | Difference in specificity vs. non deduplicated results (p-value) |
|------------------------------------------------|----------------------------|----|-----|----|-------|------------------------------|-------|-----|-----|-------|----------|----------|------------------------------------|-----------------------|------------------------------------|------------------------|-----------------------------------|---------------------------------|----------------------------------------------|------------------------------------------------------------------|------------------------------------------------------------------|
|                                                | R                          | S  | U   | F  | Total | R                            | S     | U   | F   | Total |          |          |                                    |                       |                                    |                        |                                   |                                 |                                              |                                                                  |                                                                  |
| Deduplicated for genomically identical samples |                            |    |     |    |       |                              |       |     |     |       |          |          |                                    |                       |                                    |                        |                                   |                                 |                                              |                                                                  |                                                                  |
| Isoniazid                                      | 2,672                      | 84 | 84  | 32 | 2,872 | 61                           | 5,502 | 203 | 108 | 5,874 | 97.8     | 98.5     | 97.0                               | 93.0                  | 98.9                               | 93.7                   | 4.9                               | 32.8                            | 33.1                                         | 0.7                                                              | 0.7                                                              |
| Rifampicin                                     | 2,388                      | 65 | 6   | 68 | 2,527 | 77                           | 5,935 | 190 | 137 | 6,339 | 96.9     | 98.9     | 97.4                               | 94.5                  | 98.7                               | 93.6                   | 4.5                               | 28.5                            | 29.0                                         | 0.7                                                              | 0.9                                                              |
| Ethambutol                                     | 1,226                      | 73 | 86  | 39 | 1,424 | 409                          | 5,979 | 709 | 64  | 7,161 | 75.0     | 98.8     | 94.4                               | 86.1                  | 93.6                               | 83.5                   | 10.5                              | 16.6                            | 16.9                                         | 0.9                                                              | 1.0                                                              |
| Pyrazinamide                                   | 740                        | 77 | 105 | 59 | 981   | 168                          | 5,436 | 170 | 86  | 5,860 | 81.5     | 98.6     | 90.6                               | 75.4                  | 97.0                               | 92.8                   | 6.1                               | 14.3                            | 12.7                                         | 0.6                                                              | 0.5                                                              |
| Deduplicated for isolates within 5 SNPs        |                            |    |     |    |       |                              |       |     |     |       |          |          |                                    |                       |                                    |                        |                                   |                                 |                                              |                                                                  |                                                                  |
| Isoniazid                                      | 2,112                      | 77 | 75  | 24 | 2,288 | 34                           | 4,741 | 181 | 102 | 5,058 | 98.4     | 98.4     | 96.5                               | 92.3                  | 99.3                               | 93.7                   | 5.2                               | 31.1                            | 31.4                                         | 0.2                                                              | 0.1                                                              |
| Rifampicin                                     | 1,868                      | 56 | 5   | 54 | 1,983 | 61                           | 5,145 | 144 | 116 | 5,466 | 96.8     | 98.9     | 97.1                               | 94.2                  | 98.8                               | 94.1                   | 4.3                               | 26.6                            | 27.0                                         | 0.4                                                              | 0.8                                                              |
| Ethambutol                                     | 907                        | 67 | 69  | 31 | 1,074 | 309                          | 5,156 | 627 | 50  | 6,142 | 74.6     | 98.7     | 93.1                               | 84.5                  | 94.3                               | 83.9                   | 10.8                              | 14.9                            | 15.1                                         | 0.1                                                              | 0.1                                                              |
| Pyrazinamide                                   | 575                        | 67 | 72  | 48 | 762   | 140                          | 4,770 | 89  | 66  | 5,065 | 80.4     | 98.6     | 89.6                               | 75.5                  | 97.1                               | 94.2                   | 4.7                               | 13.1                            | 11.6                                         | 0.3                                                              | 0.3                                                              |

## S5

S5: Drug profile predictions for isolates with complete profiles

| Phenotype | Prediction |      |      |      |      |      |      |      |      |      |      |      |      |       | Total |     |
|-----------|------------|------|------|------|------|------|------|------|------|------|------|------|------|-------|-------|-----|
|           | RRRR       | RRRS | RRSR | RRSS | RSRR | RSRS | RSSR | RSSS | SRRR | SRRS | SRSS | SSRS | SSSR | SSSS  |       |     |
| RRRR      | 488        | 10   | 6    | 0    | 0    | 1    | 0    | 0    | 1    | 0    | 0    | 0    | 0    | 0     | 0     | 506 |
| RRRS      | 95         | 158  | 3    | 10   | 0    | 4    | 1    | 1    | 0    | 0    | 1    | 0    | 0    | 0     | 0     | 273 |
| RRSR      | 105        | 12   | 33   | 5    | 0    | 0    | 2    | 1    | 0    | 0    | 0    | 0    | 0    | 0     | 0     | 158 |
| RRSS      | 35         | 92   | 9    | 176  | 0    | 0    | 0    | 4    | 0    | 1    | 5    | 0    | 0    | 11    | 333   |     |
| RSRR      | 8          | 1    | 0    | 0    | 1    | 0    | 0    | 1    | 0    | 0    | 0    | 0    | 0    | 0     | 11    |     |
| RSRS      | 0          | 2    | 0    | 0    | 0    | 18   | 0    | 2    | 0    | 0    | 0    | 0    | 0    | 3     | 25    |     |
| RSSR      | 1          | 0    | 1    | 0    | 1    | 0    | 8    | 4    | 0    | 0    | 0    | 0    | 0    | 1     | 16    |     |
| RSSS      | 2          | 4    | 0    | 8    | 0    | 22   | 2    | 306  | 0    | 0    | 0    | 0    | 0    | 25    | 369   |     |
| SRRS      | 0          | 2    | 0    | 0    | 0    | 0    | 0    | 0    | 0    | 0    | 2    | 0    | 0    | 0     | 4     |     |
| SRRR      | 0          | 0    | 0    | 0    | 0    | 0    | 0    | 0    | 0    | 0    | 1    | 0    | 0    | 2     | 3     |     |
| SRSS      | 0          | 1    | 0    | 5    | 0    | 0    | 0    | 0    | 0    | 0    | 59   | 0    | 0    | 16    | 81    |     |
| SSRS      | 0          | 0    | 0    | 0    | 0    | 0    | 0    | 0    | 0    | 0    | 1    | 0    | 0    | 7     | 8     |     |
| SSSR      | 0          | 0    | 0    | 0    | 0    | 0    | 0    | 0    | 0    | 0    | 0    | 0    | 51   | 20    | 71    |     |
| SSSS      | 0          | 0    | 0    | 1    | 0    | 0    | 0    | 18   | 1    | 0    | 23   | 2    | 10   | 3,952 | 4,007 |     |
| Total     | 734        | 282  | 52   | 205  | 2    | 45   | 13   | 337  | 2    | 1    | 92   | 2    | 61   | 4,037 | 5,865 |     |

All profiles are presented in the following order: Isoniazid, Rifampicin, Ethambutol, Pyrazinamide, with S indicating susceptibility and R indicating resistance.

# S6

Result for isolates with full phenotypic drug profiles:

|              | Resistant phenotype, n (%) |    |     |    |       | Susceptible phenotype, n (%) |       |     |     |       | PPV, (%) | NPV, (%) | Sensitivity (predictions only) (%) | Sensitivity (all) (%) | Specificity (predictions only) (%) | Specificity (all) (%) | No genotypic prediction made, (%) | Resistance prevalence (all) (%) | Resistance prevalence (predictions only) (%) |
|--------------|----------------------------|----|-----|----|-------|------------------------------|-------|-----|-----|-------|----------|----------|------------------------------------|-----------------------|------------------------------------|-----------------------|-----------------------------------|---------------------------------|----------------------------------------------|
|              | R                          | S  | U   | F  | Total | R                            | S     | U   | F   | Total |          |          |                                    |                       |                                    |                       |                                   |                                 |                                              |
| All isolates |                            |    |     |    |       |                              |       |     |     |       |          |          |                                    |                       |                                    |                       |                                   |                                 |                                              |
| Isoniazid    | 2,214                      | 65 | 70  | 34 | 2,383 | 30                           | 4,848 | 147 | 108 | 5,133 | 98.7     | 98.7     | 97.1                               | 92.9                  | 99.4                               | 94.4                  | 4.8                               | 31.7                            | 31.8                                         |
| Rifampicin   | 1,852                      | 51 | 3   | 61 | 1,967 | 70                           | 5,213 | 133 | 133 | 5,549 | 96.4     | 99.0     | 97.3                               | 94.2                  | 98.7                               | 93.9                  | 4.4                               | 26.2                            | 26.5                                         |
| Ethambutol   | 1,038                      | 47 | 61  | 39 | 1,185 | 397                          | 5,263 | 611 | 60  | 6,331 | 72.3     | 99.1     | 95.7                               | 87.6                  | 93.0                               | 83.1                  | 10.3                              | 15.8                            | 16.1                                         |
| Pyrazinamide | 795                        | 81 | 110 | 74 | 1,060 | 173                          | 5,989 | 188 | 106 | 6,456 | 82.1     | 98.7     | 90.8                               | 75.0                  | 97.2                               | 92.8                  | 6.4                               | 14.1                            | 12.4                                         |

Result for isolates with full phenotypic profiles for the collections that are not enriched for resistance:

|              |     |   |   |   |     |    |       |     |     |       |      |       |       |       |      |      |      |     |     |
|--------------|-----|---|---|---|-----|----|-------|-----|-----|-------|------|-------|-------|-------|------|------|------|-----|-----|
| Isoniazid    | 268 | 7 | 9 | 4 | 288 | 15 | 3,639 | 101 | 86  | 3,841 | 94.7 | 99.8  | 97.5  | 93.1  | 99.6 | 94.7 | 4.8  | 7.0 | 7.0 |
| Rifampicin   | 91  | 0 | 0 | 8 | 99  | 28 | 3,794 | 100 | 108 | 4,030 | 76.5 | 100.0 | 100.0 | 91.9  | 99.3 | 94.1 | 5.2  | 2.4 | 2.3 |
| Ethambutol   | 59  | 0 | 0 | 0 | 59  | 39 | 3,566 | 431 | 34  | 4,070 | 60.2 | 100.0 | 100.0 | 100.0 | 98.9 | 87.6 | 11.3 | 1.4 | 1.6 |
| Pyrazinamide | 99  | 6 | 4 | 5 | 114 | 26 | 3,917 | 14  | 58  | 4,015 | 79.2 | 99.8  | 94.3  | 86.8  | 99.3 | 97.6 | 2.0  | 2.8 | 2.6 |

## S7

Drug profile predictions for collections from Germany, Italy, the Netherlands and the UK that are unenriched for resistance. Includes isolates with uncharacterised variants relevant to rifampicin, ethambutol or pyrazinamide.

| Prediction                                                                                                          | Genotypic drug profiles    |        |        |     | Phenotype       |                 | Sensitivity % | Specificity % | PPV % | NPV % | Predictions made % |
|---------------------------------------------------------------------------------------------------------------------|----------------------------|--------|--------|-----|-----------------|-----------------|---------------|---------------|-------|-------|--------------------|
|                                                                                                                     | Inh                        | Rif    | Emb    | Pza | Pan-susceptible | Some resistance |               |               |       |       |                    |
| (a) Predicted pan-susceptible                                                                                       | S                          | S      | S      | S   | 3,008           | 9               |               |               |       |       |                    |
| (b) Predicted pan-susceptible after inferring that 'U' mutations are consistent with susceptibility in this context | S                          | S      | S      | U   | 9               | 0               |               |               |       |       |                    |
|                                                                                                                     | S                          | S      | U      | S   | 331             | 2               |               |               |       |       |                    |
|                                                                                                                     | S                          | S      | U      | U   | 2               | 0               |               |               |       |       |                    |
|                                                                                                                     | S                          | U      | S      | S   | 64              | 0               |               |               |       |       |                    |
|                                                                                                                     | S                          | U      | U      | S   | 25              | 0               |               |               |       |       |                    |
|                                                                                                                     | Total                      |        |        |     | 3,439           | 11              |               |               |       |       |                    |
| (c) Predicted to have some phenotypic resistance                                                                    | R                          | S      | R or S |     | 12              | 145             |               |               |       |       |                    |
|                                                                                                                     | S                          | R or S |        |     | 25              | 47              |               |               |       |       |                    |
|                                                                                                                     | R                          | R      | R or S |     | 1               | 77              |               |               |       |       |                    |
|                                                                                                                     | Total                      |        |        |     | 38              | 269             |               |               |       |       |                    |
| Results for (a) and (c)                                                                                             |                            |        |        |     |                 |                 | 96.8          | 98.8          | 87.6  | 99.7  | 80.5               |
| Results for (a), (b) and (c)                                                                                        |                            |        |        |     |                 |                 | 96.1          | 98.9          | 87.6  | 99.7  | 91.0               |
| No prediction made (incomplete prediction)                                                                          | U                          | S or U |        |     | 91              | 6               |               |               |       |       |                    |
|                                                                                                                     | At least one F, no R       |        |        |     | 193             | 6               |               |               |       |       |                    |
|                                                                                                                     | At least one R and U, no F |        |        |     | 4               | 43              |               |               |       |       |                    |
|                                                                                                                     | At least one R and F, no U |        |        |     | 3               | 24              |               |               |       |       |                    |
|                                                                                                                     | At least one R, U, and F   |        |        |     | 0               | 2               |               |               |       |       |                    |
|                                                                                                                     | Total                      |        |        |     | 291             | 81              |               |               |       |       |                    |

PPV = Positive Predictive Value; NPV = Negative Predictive Value; Inh=Isoniazid; Rif=Rifampicin; Emb=Ethambutol; Pza=Pyrazinamide; R=resistant; S=susceptible; U=mutation of unknown association present; F=genotypic prediction failed due to missing data around a genomic resistance locus. Sensitivity, specificity, NPV and PPV are calculated including and excluding predictions of pan-susceptibility for isolates containing a 'U' mutation.



# S8

Isolates for which the phenotypes could be re-tested or cross-checked:

| Source               | Labnumber    | Drug         | Original reported phenotype | Mutation               | Phenotype after re-testing | Results of cross-checking source database                                                                                  |
|----------------------|--------------|--------------|-----------------------------|------------------------|----------------------------|----------------------------------------------------------------------------------------------------------------------------|
| University of Sydney | S2           | Ethambutol   | S                           | embB_G406D             | Not growing                |                                                                                                                            |
| University of Sydney | S3           | Ethambutol   | S                           | embB_M306V             | R                          |                                                                                                                            |
| University of Sydney | S7           | Ethambutol   | S                           | embB_M306V             | R                          |                                                                                                                            |
| University of Sydney | S8           | Ethambutol   | S                           | embB_M306I             | R                          |                                                                                                                            |
| University of Sydney | S11          | Ethambutol   | S                           | embB_M306I, embB_G406S | R                          |                                                                                                                            |
| University of Sydney | S15          | Ethambutol   | S                           | embB_M306I             | S                          |                                                                                                                            |
| University of Sydney | S20          | Ethambutol   | S                           | embB_M306V             | Contaminated with Bacillus |                                                                                                                            |
| University of Sydney | S23          | Ethambutol   | S                           | embB_G406D             | Could not be tested        |                                                                                                                            |
| University of Sydney | S30          | Ethambutol   | S                           | embB_D354A             | R                          |                                                                                                                            |
| University of Sydney | S33          | Ethambutol   | S                           | embB_M306V             | R                          |                                                                                                                            |
| University of Sydney | S41          | Ethambutol   | S                           | embB_G406A             | R                          |                                                                                                                            |
| Harvard              | NLA000016764 | Ethambutol   | R                           |                        |                            | Clerical error - no phenotype was done for Ethambutol                                                                      |
| Harvard              | NLA000801694 | Isoniazid    | R                           |                        |                            | Clerical error - was tested as susceptible                                                                                 |
| Harvard              | NLA000801697 | Isoniazid    | R                           |                        |                            | Clerical error - was tested as susceptible                                                                                 |
| Harvard              | NLA000801694 | Rifampicin   | R                           |                        |                            | Clerical error - was tested as susceptible                                                                                 |
| Harvard              | NLA000801697 | Rifampicin   | R                           |                        |                            | Clerical error - was tested as susceptible                                                                                 |
| Netherlands          | NL491        | Ethambutol   | R                           |                        |                            | Clerical error - this was reported as susceptible by MGIT, resistant by MIC plate (10 mg/l)                                |
| Netherlands          | NL294        | Ethambutol   | S                           | embB_M306I             |                            | Susceptible by MGIT, resistant by MIC plate (10 mg/l)                                                                      |
| Netherlands          | NL241        | Ethambutol   | S                           | embB_M306V             |                            | Susceptible by MGIT, resistant by MIC plate (10 mg/l)                                                                      |
| Netherlands          | NL294        | Pyrazinamide | S                           | pncA_F58L              |                            | Susceptible in MGIT at 100mh/l (x3) but resistant at 25mg/l (x1) and 50mg/l (x1), therefore can be considered intermediate |
| Peru                 | 14722_6_10   | Rifampicin   | R                           |                        | S                          |                                                                                                                            |
| Peru                 | 14722_6_13   | Isoniazid    | S                           | fabG1_C-15T            | S                          |                                                                                                                            |
| Peru                 | 14722_6_21   | Isoniazid    | R                           |                        | S                          |                                                                                                                            |
| Peru                 | 14722_6_36   | Rifampicin   | S                           | rpoB_D435F             | R                          |                                                                                                                            |
| Peru                 | 14722_6_38   | Isoniazid    | S                           | fabG1_C-15T            | S                          |                                                                                                                            |
| Peru                 | 14722_6_41   | Rifampicin   | S                           | rpoB_D435F             | R                          |                                                                                                                            |
| Peru                 | 14722_6_59   | Isoniazid    | S                           | fabG1_G-17T            | S                          |                                                                                                                            |
| Peru                 | 14722_6_86   | Isoniazid    | S                           | fabG1_C-15T            | S                          |                                                                                                                            |
| Peru                 | 14892_2_37   | Rifampicin   | S                           | rpoB_D435V             | R                          |                                                                                                                            |
| Peru                 | 14892_2_59   | Isoniazid    | S                           | fabG1_G-17T            | S                          |                                                                                                                            |
| Peru                 | 14893_2_23   | Isoniazid    | S                           | fabG1_C-15T            | S                          |                                                                                                                            |
| Peru                 | 14893_2_45   | Isoniazid    | S                           | fabG1_C-15T            | S                          |                                                                                                                            |
| Peru                 | 14893_2_48   | Isoniazid    | S                           | fabG1_C-15T            | S                          |                                                                                                                            |
| Peru                 | 14893_2_52   | Isoniazid    | S                           | fabG1_G-17T            | S                          |                                                                                                                            |
| Peru                 | 14893_2_64   | Isoniazid    | R                           |                        | R                          |                                                                                                                            |
| Peru                 | 15277_3_57   | Isoniazid    | S                           | fabG1_C-15T            | S                          |                                                                                                                            |

**Performance over whole data set of variants consistent with susceptibility that were present in phenotypically resistant isolates. Variants only shown where they feature as the only variant relevant to a drug in an isolate**

| Drug         | Variant     | Phenotypically resistant | Phenotypically susceptible |
|--------------|-------------|--------------------------|----------------------------|
| Isoniazid    | ahpC_C-52T  | 1                        | 0                          |
| Isoniazid    | fabG1_S126N | 1                        | 5                          |
| Isoniazid    | inhA_C-40T  | 1                        | 208                        |
| Isoniazid    | katG_C-85T  | 3                        | 63                         |
| Isoniazid    | katG_T475I  | 1                        | 10                         |
| Ethambutol   | embA_G-43C  | 3                        | 4                          |
| Ethambutol   | embB_D1024N | 5                        | 5                          |
| Ethambutol   | embB_D328H  | 2                        | 3                          |
| Ethambutol   | embB_E504D  | 2                        | 0                          |
| Ethambutol   | embB_G-6A   | 1                        | 26                         |
| Ethambutol   | embB_H1002R | 7                        | 7                          |
| Ethambutol   | embB_Q497P  | 2                        | 3                          |
| Ethambutol   | embB_T1082A | 1                        | 18                         |
| Ethambutol   | embC_A774S  | 1                        | 29                         |
| Pyrazinamide | pncA_D63A   | 2                        | 0                          |

**Performance over whole data set of resistance variants that were found in susceptible isolates. Variants only counted where they feature as the only resistant-variant relevant to a drug in an isolate**

| Drug         | Variant         | Phenotypically resistant | Phenotypically susceptible |
|--------------|-----------------|--------------------------|----------------------------|
| Isoniazid    | fabG1_C-15T     | 228                      | 21                         |
| Isoniazid    | fabG1_G-17T     | 7                        | 3                          |
| Isoniazid    | fabG1_L203L     | 55                       | 28                         |
| Isoniazid    | fabG1_T-8A      | 7                        | 3                          |
| Isoniazid    | fabG1_T-8C      | 4                        | 1                          |
| Isoniazid    | inhA_I21T       | 1                        | 1                          |
| Isoniazid    | inhA_S94A       | 4                        | 3                          |
| Isoniazid    | katG_1438_indel | 0                        | 1                          |
| Isoniazid    | katG_2005_indel | 2                        | 1                          |
| Isoniazid    | katG_606_indel  | 0                        | 1                          |
| Rifampicin   | rpoB_D435A      | 0                        | 1                          |
| Rifampicin   | rpoB_D435F      | 8                        | 2                          |
| Rifampicin   | rpoB_D435G      | 2                        | 2                          |
| Rifampicin   | rpoB_D435V      | 181                      | 2                          |
| Rifampicin   | rpoB_D435Y      | 29                       | 13                         |
| Rifampicin   | rpoB_D545E      | 0                        | 3                          |
| Rifampicin   | rpoB_H445N      | 9                        | 10                         |
| Rifampicin   | rpoB_H445R      | 24                       | 1                          |
| Rifampicin   | rpoB_H445Y      | 141                      | 2                          |
| Rifampicin   | rpoB_I491F      | 40                       | 7                          |
| Rifampicin   | rpoB_L430P      | 12                       | 22                         |
| Rifampicin   | rpoB_L452M      | 0                        | 1                          |
| Rifampicin   | rpoB_L452P      | 39                       | 9                          |
| Rifampicin   | rpoB_M434I      | 1                        | 0                          |
| Rifampicin   | rpoB_Q432P      | 6                        | 1                          |
| Rifampicin   | rpoB_S450W      | 56                       | 1                          |
| Rifampicin   | rpoB_V359A      | 0                        | 2                          |
| Ethambutol   | embA_C-12T      | 28                       | 24                         |
| Ethambutol   | embA_C-16G      | 22                       | 3                          |
| Ethambutol   | embA_C-16T      | 12                       | 7                          |
| Ethambutol   | embB_D328Y      | 8                        | 2                          |
| Ethambutol   | embB_D354A      | 107                      | 93                         |
| Ethambutol   | embB_G406A      | 53                       | 21                         |
| Ethambutol   | embB_G406D      | 36                       | 38                         |
| Ethambutol   | embB_G406S      | 19                       | 3                          |
| Ethambutol   | embB_M306I      | 320                      | 130                        |
| Ethambutol   | embB_M306L      | 26                       | 10                         |
| Ethambutol   | embB_M306V      | 512                      | 98                         |
| Ethambutol   | embB_Q497K      | 15                       | 6                          |
| Ethambutol   | embB_Q497R      | 122                      | 28                         |
| Pyrazinamide | pncA_-30_indel  | 0                        | 1                          |
| Pyrazinamide | pncA_-3_indel   | 0                        | 3                          |
| Pyrazinamide | pncA_-5_indel   | 7                        | 4                          |
| Pyrazinamide | pncA_-79_indel  | 1                        | 1                          |
| Pyrazinamide | pncA_-868_indel | 0                        | 1                          |
| Pyrazinamide | pncA_189_indel  | 0                        | 1                          |
| Pyrazinamide | pncA_193_indel  | 2                        | 1                          |
| Pyrazinamide | pncA_220_indel  | 0                        | 1                          |
| Pyrazinamide | pncA_256_indel  | 1                        | 1                          |
| Pyrazinamide | pncA_303_indel  | 0                        | 1                          |
| Pyrazinamide | pncA_382_indel  | 1                        | 1                          |
| Pyrazinamide | pncA_386_indel  | 3                        | 1                          |
| Pyrazinamide | pncA_391_indel  | 19                       | 1                          |
| Pyrazinamide | pncA_407_indel  | 4                        | 1                          |
| Pyrazinamide | pncA_408_indel  | 1                        | 2                          |
| Pyrazinamide | pncA_417_indel  | 3                        | 1                          |
| Pyrazinamide | pncA_478_indel  | 0                        | 1                          |
| Pyrazinamide | pncA_501_indel  | 0                        | 1                          |
| Pyrazinamide | pncA_62_indel   | 0                        | 1                          |
| Pyrazinamide | pncA_80_indel   | 0                        | 1                          |
| Pyrazinamide | pncA_A-11G      | 38                       | 14                         |
| Pyrazinamide | pncA_A102P      | 3                        | 1                          |
| Pyrazinamide | pncA_A134V      | 4                        | 1                          |
| Pyrazinamide | pncA_A143D      | 1                        | 1                          |
| Pyrazinamide | pncA_A146T      | 1                        | 1                          |
| Pyrazinamide | pncA_A171E      | 0                        | 1                          |
| Pyrazinamide | pncA_A171T      | 1                        | 5                          |
| Pyrazinamide | pncA_A46V       | 2                        | 1                          |
| Pyrazinamide | pncA_C14R       | 6                        | 2                          |
| Pyrazinamide | pncA_D12A       | 4                        | 9                          |
| Pyrazinamide | pncA_D12E       | 2                        | 1                          |
| Pyrazinamide | pncA_D12G       | 3                        | 1                          |
| Pyrazinamide | pncA_D136N      | 0                        | 2                          |
| Pyrazinamide | pncA_D49G       | 3                        | 1                          |
| Pyrazinamide | pncA_D63G       | 0                        | 4                          |
| Pyrazinamide | pncA_D63H       | 1                        | 1                          |

|                         |    |   |
|-------------------------|----|---|
| Pyrazinamide pncA_D8G   | 6  | 1 |
| Pyrazinamide pncA_D8N   | 2  | 1 |
| Pyrazinamide pncA_F13V  | 0  | 2 |
| Pyrazinamide pncA_F58L  | 3  | 3 |
| Pyrazinamide pncA_F81S  | 0  | 2 |
| Pyrazinamide pncA_F81V  | 0  | 2 |
| Pyrazinamide pncA_F94C  | 2  | 1 |
| Pyrazinamide pncA_F94L  | 2  | 3 |
| Pyrazinamide pncA_G108R | 2  | 1 |
| Pyrazinamide pncA_G124S | 0  | 1 |
| Pyrazinamide pncA_G132A | 4  | 2 |
| Pyrazinamide pncA_G17D  | 1  | 1 |
| Pyrazinamide pncA_G24D  | 4  | 1 |
| Pyrazinamide pncA_G78C  | 0  | 1 |
| Pyrazinamide pncA_G97D  | 24 | 4 |
| Pyrazinamide pncA_H51R  | 12 | 1 |
| Pyrazinamide pncA_H57D  | 70 | 3 |
| Pyrazinamide pncA_H71R  | 2  | 4 |
| Pyrazinamide pncA_H71Y  | 17 | 3 |
| Pyrazinamide pncA_I31T  | 0  | 1 |
| Pyrazinamide pncA_I5T   | 0  | 1 |
| Pyrazinamide pncA_K48E  | 1  | 1 |
| Pyrazinamide pncA_K48T  | 6  | 8 |
| Pyrazinamide pncA_K96Q  | 0  | 2 |
| Pyrazinamide pncA_K96R  | 8  | 2 |
| Pyrazinamide pncA_L116P | 2  | 1 |
| Pyrazinamide pncA_L151S | 8  | 4 |
| Pyrazinamide pncA_L172P | 5  | 1 |
| Pyrazinamide pncA_L182S | 1  | 3 |
| Pyrazinamide pncA_L19P  | 3  | 1 |
| Pyrazinamide pncA_L27P  | 4  | 2 |
| Pyrazinamide pncA_L35P  | 2  | 4 |
| Pyrazinamide pncA_L4S   | 20 | 5 |
| Pyrazinamide pncA_L4W   | 1  | 3 |
| Pyrazinamide pncA_L85P  | 3  | 1 |
| Pyrazinamide pncA_L85R  | 5  | 2 |
| Pyrazinamide pncA_M175I | 0  | 2 |
| Pyrazinamide pncA_M175V | 4  | 2 |
| Pyrazinamide pncA_P54L  | 19 | 3 |
| Pyrazinamide pncA_P62S  | 1  | 3 |
| Pyrazinamide pncA_P69S  | 0  | 1 |
| Pyrazinamide pncA_S104R | 3  | 2 |
| Pyrazinamide pncA_S65P  | 0  | 1 |
| Pyrazinamide pncA_S67P  | 8  | 1 |
| Pyrazinamide pncA_T135I | 0  | 1 |
| Pyrazinamide pncA_T135P | 15 | 1 |
| Pyrazinamide pncA_T135S | 0  | 1 |
| Pyrazinamide pncA_T142M | 3  | 1 |
| Pyrazinamide pncA_T168S | 0  | 2 |
| Pyrazinamide pncA_T47A  | 1  | 3 |
| Pyrazinamide pncA_T47I  | 0  | 2 |
| Pyrazinamide pncA_V125F | 0  | 2 |
| Pyrazinamide pncA_V128G | 9  | 2 |
| Pyrazinamide pncA_V139A | 8  | 8 |
| Pyrazinamide pncA_V139G | 5  | 1 |
| Pyrazinamide pncA_V139L | 2  | 1 |
| Pyrazinamide pncA_V21A  | 0  | 1 |
| Pyrazinamide pncA_V7A   | 0  | 1 |
| Pyrazinamide pncA_V7F   | 2  | 1 |
| Pyrazinamide pncA_V7G   | 13 | 2 |
| Pyrazinamide pncA_V7L   | 1  | 1 |
| Pyrazinamide pncA_W119R | 2  | 2 |
| Pyrazinamide pncA_W68G  | 14 | 1 |
| Pyrazinamide pncA_W68R  | 6  | 1 |
| Pyrazinamide pncA_Y103* | 12 | 2 |
| Pyrazinamide pncA_Y41*  | 0  | 1 |

# S10

For each of isoniazid and rifampicin, calculate the expected mislabelling rate based on isolates with mutations (rpoB S450L or katG S315T) but a susceptible phenotype. For these calculations, the collection from Russia was excluded for isoniazid as the katG S315T mutations with a susceptible phenotype had already been excluded at source (in a previous publication). The isolates included below include all those that were excluded from the main analysis after being identified as likely mislabelling errors.

Expected:  
 (Total number of isolates with a susceptible phenotype x number with the mutation and a susceptible phenotype) / (sum of isolates with the mutation) x ((1-prevalence of resistance)/prevalence of resistance)

The ratio of expected to observed errors was then taken as the proportion of discrepant isolates likely to be due to mislabelling

| Drug          | Source (see S1)                                                              | Phenotypes |             |                          | Where a katG_S315T or rpoB_S450L mutation is present |                       | Among the susceptible phenotypes |                     | Errors (predicted resistant but phenotypically susceptible) |                 | Ratio (expected / observed) |
|---------------|------------------------------------------------------------------------------|------------|-------------|--------------------------|------------------------------------------------------|-----------------------|----------------------------------|---------------------|-------------------------------------------------------------|-----------------|-----------------------------|
|               |                                                                              | Resistant  | Susceptible | Prevalence of resistance | Resistant phenotype                                  | Susceptible phenotype | Predicted susceptible            | Predicted resistant | Expected errors                                             | Observed errors |                             |
| Isoniazid     | University of Sydney                                                         | 42         | 0           | 100.00                   | 31                                                   | 0                     | 0                                | 0                   | .                                                           | 0               |                             |
| Rifampicin    | University of Sydney                                                         | 38         | 4           | 90.48                    | 21                                                   | 0                     | 4                                | 0                   | 0.00                                                        | 0               |                             |
| Isoniazid     | Genoscreen (isolates from Belgium)                                           | 100        | 135         | 42.55                    | 86                                                   | 0                     | 127                              | 0                   | 0.00                                                        | 0               |                             |
| Rifampicin    | Genoscreen (isolates from Belgium)                                           | 98         | 137         | 41.70                    | 74                                                   | 0                     | 128                              | 1                   | 0.00                                                        | 1               |                             |
| Isoniazid     | Birmingham                                                                   | 259        | 3,115       | 7.68                     | 168                                                  | 9                     | 2,953                            | 19                  | 13.17                                                       | 19              |                             |
| Rifampicin    | Birmingham                                                                   | 100        | 3,295       | 2.95                     | 58                                                   | 1                     | 3,088                            | 29                  | 1.69                                                        | 29              |                             |
| Isoniazid     | British Columbia Centre for Disease Control                                  | 189        | 1,152       | 14.09                    | 70                                                   | 0                     | 1,080                            | 19                  | 0.00                                                        | 19              |                             |
| Rifampicin    | British Columbia Centre for Disease Control                                  | 38         | 1,304       | 2.83                     | 18                                                   | 0                     | 1,208                            | 4                   | 0.00                                                        | 4               |                             |
| Isoniazid     | Hamburg                                                                      | 23         | 253         | 8.33                     | 17                                                   | 2                     | 241                              | 6                   | 2.42                                                        | 6               |                             |
| Rifampicin    | Hamburg                                                                      | 15         | 261         | 5.43                     | 12                                                   | 0                     | 254                              | 3                   | 0.00                                                        | 3               |                             |
| Isoniazid     | Italy                                                                        | 130        | 0           | 100.00                   | 121                                                  | 0                     | 0                                | 0                   | .                                                           | 0               |                             |
| Rifampicin    | Italy                                                                        | 128        | 2           | 98.46                    | 91                                                   | 0                     | 2                                | 0                   | 0.00                                                        | 0               |                             |
| Isoniazid     | Italy_MGITstudy                                                              | 11         | 84          | 11.58                    | 7                                                    | 0                     | 74                               | 0                   | 0.00                                                        | 0               |                             |
| Rifampicin    | Italy_MGITstudy                                                              | 4          | 91          | 4.21                     | 2                                                    | 0                     | 79                               | 0                   | 0.00                                                        | 0               |                             |
| Isoniazid     | Leeds                                                                        | 3          | 28          | 9.68                     | 3                                                    | 0                     | 25                               | 0                   | 0.00                                                        | 0               |                             |
| Rifampicin    | Leeds                                                                        | 3          | 28          | 9.68                     | 3                                                    | 0                     | 25                               | 0                   | 0.00                                                        | 0               |                             |
| Isoniazid     | London                                                                       | 358        | 21          | 94.46                    | 312                                                  | 0                     | 17                               | 0                   | 0.00                                                        | 0               |                             |
| Rifampicin    | London                                                                       | 350        | 23          | 93.83                    | 248                                                  | 0                     | 20                               | 0                   | 0.00                                                        | 0               |                             |
| Isoniazid     | Harvard (isolates from the Netherlands)                                      | 302        | 38          | 88.82                    | 218                                                  | 1                     | 34                               | 1                   | 1.38                                                        | 1               |                             |
| Rifampicin    | Harvard (isolates from the Netherlands)                                      | 292        | 47          | 86.14                    | 171                                                  | 1                     | 38                               | 8                   | 1.70                                                        | 8               |                             |
| Isoniazid     | Netherlands                                                                  | 36         | 484         | 6.92                     | 33                                                   | 1                     | 456                              | 2                   | 1.06                                                        | 2               |                             |
| Rifampicin    | Netherlands                                                                  | 14         | 514         | 2.65                     | 13                                                   | 0                     | 490                              | 2                   | 0.00                                                        | 2               |                             |
| Isoniazid     | Oxford                                                                       | 6          | 29          | 17.14                    | 2                                                    | 0                     | 23                               | 0                   | 0.00                                                        | 0               |                             |
| Rifampicin    | Oxford                                                                       | 2          | 33          | 5.71                     | 2                                                    | 0                     | 30                               | 0                   | 0.00                                                        | 0               |                             |
| Isoniazid     | Pakistan                                                                     | 357        | 62          | 85.20                    | 273                                                  | 3                     | 54                               | 5                   | 3.88                                                        | 5               |                             |
| Rifampicin    | Pakistan                                                                     | 352        | 67          | 84.01                    | 201                                                  | 1                     | 57                               | 8                   | 1.74                                                        | 8               |                             |
| Isoniazid     | Peru                                                                         | 85         | 32          | 72.65                    | 78                                                   | 2                     | 18                               | 12                  | 2.13                                                        | 12              |                             |
| Rifampicin    | Peru                                                                         | 64         | 53          | 54.70                    | 40                                                   | 0                     | 45                               | 4                   | 0.00                                                        | 4               |                             |
| Isoniazid     | Serbia                                                                       | 107        | 0           | 100.00                   | 85                                                   | 0                     | 0                                | 0                   | .                                                           | 0               |                             |
| Rifampicin    | Serbia                                                                       | 107        | 0           | 100.00                   | 59                                                   | 0                     | 0                                | 0                   | .                                                           | 0               |                             |
| Isoniazid     | Yang et. al. Lancet Infect Dis. 2017 Mar;17(3):275-284 (isolates from China) | 121        | 0           | 100.00                   | 102                                                  | 0                     | 0                                | 0                   | .                                                           | 0               |                             |
| Rifampicin    | Yang et. al. Lancet Infect Dis. 2017 Mar;17(3):275-284 (isolates from China) | 121        | 0           | 100.00                   | 72                                                   | 0                     | 0                                | 0                   | .                                                           | 0               |                             |
| Isoniazid     | South Africa                                                                 | 197        | 701         | 21.94                    | 110                                                  | 7                     | 655                              | 13                  | 11.79                                                       | 13              |                             |
| Rifampicin    | South Africa                                                                 | 337        | 670         | 33.47                    | 182                                                  | 2                     | 629                              | 12                  | 3.66                                                        | 12              |                             |
| Isoniazid     | Spain                                                                        | 13         | 51          | 20.31                    | 7                                                    | 0                     | 50                               | 0                   | 0.00                                                        | 0               |                             |
| Rifampicin    | Spain                                                                        | 10         | 54          | 15.63                    | 7                                                    | 0                     | 52                               | 0                   | 0.00                                                        | 0               |                             |
| Isoniazid     | MSF (isolates from Swaziland)                                                | 137        | 136         | 50.18                    | 115                                                  | 0                     | 121                              | 8                   | 0.00                                                        | 8               |                             |
| Rifampicin    | MSF (isolates from Swaziland)                                                | 120        | 146         | 45.11                    | 57                                                   | 0                     | 143                              | 2                   | 0.00                                                        | 2               |                             |
| Isoniazid     | Thailand                                                                     | 199        | 58          | 77.43                    | 157                                                  | 1                     | 53                               | 1                   | 1.26                                                        | 1               |                             |
| Rifampicin    | Thailand                                                                     | 196        | 61          | 76.26                    | 89                                                   | 0                     | 56                               | 1                   | 0.00                                                        | 1               |                             |
| Isoniazid     | Zhang et. al. Nat Genet. 2013 Oct;45(10):1255-60 (isolates from China)       | 117        | 44          | 72.67                    | 65                                                   | 0                     | 40                               | 0                   | 0.00                                                        | 0               |                             |
| Rifampicin    | Zhang et. al. Nat Genet. 2013 Oct;45(10):1255-60 (isolates from China)       | 117        | 44          | 72.67                    | 56                                                   | 0                     | 43                               | 1                   | 0.00                                                        | 1               |                             |
| <b>Totals</b> |                                                                              |            |             |                          |                                                      |                       |                                  |                     | <b>Expected</b>                                             | <b>Observed</b> | <b>Ratio (%)</b>            |
| Isoniazid     |                                                                              |            |             |                          |                                                      |                       |                                  |                     | 37.08                                                       | 86              | 43.12                       |
| Rifampicin    |                                                                              |            |             |                          |                                                      |                       |                                  |                     | 8.80                                                        | 75              | 11.73                       |

Isolates from Russia (from Casali et. al. Nat Genet. 2014 Mar;46(3):279-86) were excluded from the calculation as isolates with a katG\_S315T mutation and a susceptible phenotype for isoniazid were excluded from the publication from which these isolates were derived.
